# Supplementary material for: An integrative genomic and chemical similarity approach linking fungal secondary metabolites and biosynthetic gene clusters
Source: bioRxiv preprint, doi:10.1101/2025.05.08.652894, version 2 (2025-05-09)
Supplement: Supplementary Tables [file 652894_file03.xlsx]

## Sheet: Table 1
SM group #	feature (SM)	BGC link	BGC present	confidence	Reference	#	comment
1	Ilicicolin E B	BGC0001923, BGC0001924 (New BGC 1)	no	predicted	(Araki et al. 2019)	43
2	(3β,22E)-Ergosta-4,6,8(14),22-tetraene-3-ol A	(primary metabolism)	–	–		60
3	Fumagillol B	BGC0001067	yes	reported	(Lin et al. 2013)	30
4	Brevianamide A/B B	BGC0001084, BGC0000816 (New BGC 2)	no	predicted		48
4	Brevianamide C/D B	BGC0001084, BGC0000816 (New BGC 2)	no	predicted		49
5	Brevianamide Q B	BGC0000442 (New BGC 3)	no	predicted		54
5	Brevianamide R B	BGC0000442 (New BGC 3)	no	predicted		55
5	Brevianamide T B	BGC0000442 (New BGC 3)	no	predicted		56
5	Brevianamide U B	BGC0000442 (New BGC 3)	no	predicted		57		The point of having tanimoto similarity as absolute measure and clustering is that
5	Brevianamide V/W B	BGC0000356 (New BGC 3)	no	predicted		58		with Tanimoto similarity you get the abslute measure
5	Brevianamide K B	BGC0000442 (New BGC 3)	no	predicted		59		but clustering helps to group copmpounds and gives intuition about putatively linked compounds.
6	Cottoquinazoline E A	BGC0000355	putative	predicted	(O’Hanlon et al. 2012; Ames et al. 2011)	8		This can be either several compounds blowning to the same BGC despite potentially different closest matches by Tanimoto, or identifying new BGCs.
6	Cottoquinazoline F A	BGC0000355	putative	predicted	(O’Hanlon et al. 2012; Ames et al. 2011)	9		Maybe do add distribution plot in supplement
6	Cottoquinazoline G A	BGC0000355	putative	predicted	(O’Hanlon et al. 2012; Ames et al. 2011)	10
7	Fumitremorgin F B	BGC0001142, BGC0000355 (New BGC 4)	no	predicted	(Gao et al., 2011)	31
7	Fumitremorgin G/L B	BGC0001142, BGC0000355 (New BGC 4)	no	predicted	(Gao et al., 2011)	32
8	4-Hydroxyaszonalenin B	BGC0000293, (BGC0002272)	yes	predicted	(Yin et al. 2009)	5
8	Acetylaszonalenin A	BGC0000293, (BGC0002272)	yes	reported	(Yin et al. 2009)	6
8	Aszonalenin A	BGC0000293, (BGC0002272)	yes	reported	(Yin et al. 2009), (Wakana et al., 2006)	7
9	Isoroquefortine C B	BGC0000420	yes	reported	(Shangguan et al. 2008; García-Estrada et al. 2011)	25
9	Roquefortine C B	BGC0000420	yes	reported	(Shangguan et al. 2008; García-Estrada et al. 2011)	26
10	Brevianamide E B	BGC0002272, BGC0002617	no	predicted		53
11	13-O-prenylfumitremorgin B A	BGC0000356	yes	predicted	(Maiya et al. 2006; Grundmann et al. 2008)	11
11	Brevianamide F B	BGC0000356	yes	reported	(Maiya et al. 2006; Grundmann et al. 2008)	12
11	Deoxybrevianamide E B	BGC0000356	yes	predicted	(Maiya et al. 2006; Grundmann et al. 2008)	13
11	Fumitremorgin A A	BGC0000356	yes	(reported)	(Maiya et al. 2006; Grundmann et al. 2008), via satellite gene (Mundt et al. 2012)	14
11	Fumitremorgin B A	BGC0000356	yes	reported	(Maiya et al. 2006; Grundmann et al. 2008)	15
11	Fumitremorgin C A	BGC0000356	yes	reported	(Maiya et al. 2006; Grundmann et al. 2008)	16
11	spiro[5H,10H-dipyrrolo-[1,2-a:1′,2′-d]pyrazine-2-(3H),2′-[2H]-indole]-3′,5,10(1′H)trione A	BGC0000356	yes	predicted	(Tsunematsu et al. 2013)	17
11	Tryprostatin B B	BGC0000356	yes	reported	(Maiya et al. 2006; Grundmann et al. 2008)	18
11	Tryprostatin C/D B	BGC0000356	yes	predicted	(Maiya et al. 2006; Grundmann et al. 2008)	19
11	Verruculogen B	BGC0000356	yes	reported	(Maiya et al. 2006; Grundmann et al. 2008)	20
12	hexadehydroastechrome (monomer) B	BGC0000372	yes	reported	Yin, Baccile, et al. 2013)	23
12	Trihistatin A	BGC0000420, BGC0000372	yes	predicted	(Yin, Baccile, et al. 2013)	24
13	16-O-deacetyl helvolic acid 21,16-lactone B	BGC0000686	yes	predicted	(Lv et al. 2017)	27
13	Helvolic acid A	BGC0000686	yes	reported	(Lv et al. 2017)	28
14	Pyripyropene F B	BGC0000129, BGC0001068	yes	predicted	(Itoh et al. 2010)	1
14	Pyripyropene H B	BGC0000129, BGC0001068	yes	predicted	(Itoh et al. 2010)	2
14	Pyripyropene I B	BGC0000129, BGC0001068	yes	predicted	(Itoh et al. 2010)	3
14	Pyripyropene O B	BGC0000129, BGC0001068	yes	predicted	(Itoh et al. 2010)	4
15	Azonapyrone A A	BGC0002604	yes	predicted	(Wang et al. 2019)	51
15	Sartorypyrone A A	BGC0002604	yes	reported	(Wang et al. 2019)	52
16	Circumdatin C A	BGC0000355, BGC0001652, BGC0000448, BGC0000409, BGC0000303 (New BGC 5)	no	predicted		40	should this be new BGC 1?
16	Dimetoxycircumdatin C A	BGC0000355, BGC0001652, BGC0000448, BGC0000409, BGC0000303 (New BGC 5)	no	predicted		41
17	Betaenone E B	BGC0002165, BGC0001264 (New BGC 6)	no	predicted	(Li et al. 2019)	37
17	Betaenone G/I/J B	BGC0002165, BGC0001264 (New BGC 6)	no	predicted	(Li et al. 2019)	38
17	Betaenone H B	BGC0002165, BGC0001264 (New BGC 6)	no	predicted	(Li et al. 2019)	39
18	Clavaric acid B	BGC0001248	yes	reported	(Godio, Fouces, and Martín 2007; Godio and Martín 2009)	36
19	Chaetoglobosin 542 B	BGC0002539, BGC0000968, BGC0001182	yes	predicted	(Perlatti et al. 20202)	29
20	Neosartoricin B	BGC0001144	yes	reported	(Yin, Chooi, et al. 2013; Chooi et al. 2013)	33
20	Neosartoricin C B	BGC0001144	yes	reported	(Yin, Chooi, et al. 2013; Chooi et al. 2013)	34
20	Neosartoricin D B	BGC0001144	yes	reported	(Yin, Chooi, et al. 2013; Chooi et al. 2013)	35
21	Brevianamide L B	BGC0002208, BGC0002242 (New BGC 7)	no	predicted	(Zheng et al. 2021)	45
21	Brevianamide O B	BGC0002208, BGC0002242 (New BGC 7)	no	predicted	(Zheng et al. 2021)	46
21	Brevianamide P B	BGC0002208, BGC0002242 (New BGC 7)	no	predicted	(Zheng et al. 2021)	47
22	Secalonic acids (A/ B/ C/ D/ E/ F/ F1/ G; 4,4'-Secalonic acid E) B	BGC0002063, BGC0001886, BGC0001988	yes	reported	(Neubauer et al. 2016)	42
23	Nidiascin C A	BGC0002275, BGC0002171 (New BGC 8)	no	predicted		50
24	Neosartorin A	BGC0001988	yes	reported	(Matsuda, Gotfredsen, and Larsen 2018)	44
25	Bisdethiobis(methylthio)gliotoxin A	BGC0000361	yes	reported	(Dolan et al. 2015)	21
25	Gliotoxin A	BGC0000361	yes	reported	(Dolan et al. 2015)	22

## Sheet: Table S1 extended Table 1
		Tab 2: SM-BGC pairs as suggested by compound clustering. Column 'confidence' is 'reported' when the SM is known from the BGC it's attributed to and 'predicted' if no BGC is known for the SM.
putative SMs/feature	#	feature (SM)	compound group #	BGC link	BGC present	confidence	Reference	MIBIG' or 'primary literature'/'new' (completely new BGC) or 'additional' (compound to existing BGC) or 'known' (known BGC–SM link)	estimate of prediction quality	comment
1	43	Ilicicolin E 3	1	BGC0001923, BGC0001924 (New BGC 1)	no	predicted	(Araki et al. 2019)	–/new	iii	New BGC. high structural similarity between ilicicolin E and ascochlorin. BGC0001923 (8 genes) not present, no tentative regions. BGC0001924 (3 genes) not present, no tentative regions.
1	60	(3β,22E)-Ergosta-4,6,8(14),22-tetraene-3-ol 2	2	(primary metabolism)						sterol putatively produced via primary metabolism
1	30	Fumagillol 3	3	BGC0001067	yes	reported	(Lin et al. 2013)	MIBiG/known	correct
2	48	Brevianamide A/B 3	4	BGC0001084, BGC0000816 (New BGC 2)	no	predicted		–/new	iii	New BGC. BGC0002254 (18 genes) not present but regions of interest exits (the same as for previous BGCs, matching a putative NRPS: DTO10_FUN_003576~QKG86306.1, DTO10_FUN_003580~QKG86306.1, DTO10_FUN_003582~QKG86310.1, DTO10_FUN_003583~QKG86306.1), but also (DTO10_FUN_006746~WaiD|QKG86316.1, DTO10_FUN_006747~QKG86315.1, DTO10_FUN_006748~ribosomal_protein_L31|QKG86314.1, DTO10_FUN_006749~ lysophosp…
2	49	Brevianamide C/D 3	4	BGC0001084, BGC0000816 (New BGC 2)	no	predicted		–/new	iii	New BGC. BGC0002254 (18 genes) not present but regions of interest exits (the same as for previous BGCs, matching a putative NRPS: DTO10_FUN_003576~QKG86306.1, DTO10_FUN_003580~QKG86306.1, DTO10_FUN_003582~QKG86310.1, DTO10_FUN_003583~QKG86306.1), but also (DTO10_FUN_006746~WaiD|QKG86316.1, DTO10_FUN_006747~QKG86315.1, DTO10_FUN_006748~ribosomal_protein_L31|QKG86314.1, DTO10_FUN_006749~ lysophosp…
1	54	Brevianamide Q 3	5	BGC0000442 (New BGC 3)	no	predicted		–/new	iii
1	55	Brevianamide R 3	5	BGC0000442 (New BGC 3)	no	predicted		–/new	iii
1	56	Brevianamide T 3	5	BGC0000442 (New BGC 3)	no	predicted		–/new	iii
1	57	Brevianamide U 3	5	BGC0000442 (New BGC 3)	no	predicted		–/new	iii
2	58	Brevianamide V/W 3	5	BGC0000356 (New BGC 3)	no	predicted		–/new	iii
1	59	Brevianamide K 3	5	BGC0000442 (New BGC 3)	no	predicted		–/new	iii
1	8	Cottoquinazoline E 1	6	BGC0000355	putative	predicted	(O’Hanlon et al. 2012; Ames et al. 2011)	–/additional	ii	high structural similarity between Cottoquinazoline EFG and fumiquinazoline CD
1	9	Cottoquinazoline F 1	6	BGC0000355	putative	predicted	(O’Hanlon et al. 2012; Ames et al. 2011)	–/additional	ii	high structural similarity between Cottoquinazoline EFG and fumiquinazoline CD
1	10	Cottoquinazoline G 1	6	BGC0000355	putative	predicted	(O’Hanlon et al. 2012; Ames et al. 2011)	–/additional	ii	high structural similarity between Cottoquinazoline EFG and fumiquinazoline CD
1	31	Fumitremorgin F 3	7	BGC0001142, BGC0000355 (New BGC 4)	no	predicted	(Gao et al., 2011)	MIBiG/known	ii	BGC0001142 (22 genes) not present but runs of several genes matching several BCG genes exist (eg DTO10_FUN_006044 to DTO10_FUN_006051, region not previously classified as BGC). BGC0000355 present putatively.
2	32	Fumitremorgin G/L 3	7	BGC0001142, BGC0000355 (New BGC 4)	no	predicted	(Gao et al., 2011)	MIBiG/known	ii	BGC0001142 (22 genes) not present but runs of several genes matching several BCG genes exist (eg DTO10_FUN_006044 to DTO10_FUN_006051, region not previously classified as BGC). BGC0000355 present putatively.
1	5	4-Hydroxyaszonalenin 3	8	BGC0000293, (BGC0002272)	yes	predicted	(Yin et al. 2009)	–/additional	i	high structural similarity between 4-Hydroxyaszonalenin and other compounds in the BGC
1	6	Acetylaszonalenin 1	8	BGC0000293, (BGC0002272)	yes	reported	(Yin et al. 2009)	MIBiG/known	correct
1	7	Aszonalenin 1	8	BGC0000293, (BGC0002272)	yes	reported	(Yin et al. 2009), (Wakana et al., 2006)	primlit/known	correct	hypothesis confirmed by primary literature
1	25	Isoroquefortine C 3	9	BGC0000420	yes	reported	(Shangguan et al. 2008; García-Estrada et al. 2011)	primlit/known	correct	isoroquefortin C is a known artefact
1	26	Roquefortine C 3	9	BGC0000420	yes	reported	(Shangguan et al. 2008; García-Estrada et al. 2011)	MIBiG/known	correct
1	53	Brevianamide E 3	10	BGC0002272, BGC0002617	no	predicted		MIBiG/additional	iii	not great match, 3-methylbut-1-ene; I think brevianamide E would fit better with compound cluster 4 or BGC0000356. BGC0002617 (3 genes) not present. Two of the genes (AMQ36132.1|PsyA and AMQ36134.1|PsyC frequently produce hits against the same gene), there are regions of interest (DTO13_FUN_008191, DTO13_FUN_008192, DTO13_FUN_008193, DTO13_FUN_008195 ~ AMQ36132.1|PsyA or AMQ36134.1|PsyC, region n…
1	11	13-O-prenylfumitremorgin B 1	11	BGC0000356	yes	predicted	(Maiya et al. 2006; Grundmann et al. 2008)	–/additional	i	high structural similarity between 13-O-prenylfumitremorgin B and fumitremorgin B
1	12	Brevianamide F 3	11	BGC0000356	yes	reported	(Maiya et al. 2006; Grundmann et al. 2008)	MIBiG/known	correct
1	13	Deoxybrevianamide E 3	11	BGC0000356	yes	predicted	(Maiya et al. 2006; Grundmann et al. 2008)	–/additional	i	not great match, see brevianamide E, none of the compounds in this BGC contain a 3-methylbut-1-ene sidechain (Does a 2-methylbut-2-ene=dimethylallyl DMAP transform to such a side chain? Apparently yes, DMAP isoprene units can have identity crisis/)
1	14	Fumitremorgin A 2	11	BGC0000356	yes	(reported)	Satellite (Mundt et al. 2012)	primlit/known	correct	gene known; FtmPT3 is a satellite gene to BGC0000356, not part of the core BGC
1	15	Fumitremorgin B 2	11	BGC0000356	yes	reported	(Maiya et al. 2006; Grundmann et al. 2008)	MIBiG/known	correct
1	16	Fumitremorgin C 2	11	BGC0000356	yes	reported	(Maiya et al. 2006; Grundmann et al. 2008)	MIBiG/known	correct
1	17	spiro[5H,10H-dipyrrolo-[1,2-a:1′,2′-d]pyrazine-2-(3H),2′-[2H]-indole]-3′,5,10(1′H)trione 2	11	BGC0000356	yes	predicted	(Tsunematsu et al. 2013)	–/additional	i	(Tsunematsu et al. 2013) specifically discusses spirotryprostatins highlighting that several genes can be corroborated to catalyze the spiro-ring formation (FtmG and FqzB). We have both those genes.
1	18	Tryprostatin B 3	11	BGC0000356	yes	reported	(Maiya et al. 2006; Grundmann et al. 2008)	MIBiG/known	correct
2	19	Tryprostatin C/D 3	11	BGC0000356	yes	predicted	(Maiya et al. 2006; Grundmann et al. 2008)	–/additional	i	high structural similarity between tryprostatin C/D and tryprostatin A
1	20	Verruculogen 3	11	BGC0000356	yes	reported	(Maiya et al. 2006; Grundmann et al. 2008)	MIBiG/known	correct
1	23	hexadehydroastechrome (monomer) 3	12	BGC0000372	yes	reported	Yin, Baccile, et al. 2013)	MIBiG/known	correct	Compounds from this BCG were split by the clustering algorithm, maybe due to Fe ?; similar BGC but unique NRPS with His; Trihistatin (N prenylated, vs C in Terezine D; and Pro instead of Ala?)
1	24	Trihistatin 1	12	BGC0000420, BGC0000372	yes	predicted	(Yin, Baccile, et al. 2013)	–/additional	i	Compounds from this BCG were split by the clustering algorithm, maybe due to Fe ?; similar BGC but unique NRPS with His; Trihistatin (N prenylated, vs C in Terezine D; and Pro instead of Ala?)
1	27	16-O-deacetyl helvolic acid 21,16-lactone 3	13	BGC0000686	yes	predicted	(Lv et al. 2017)	–/additional	i	high structural similarity between 16-O-deacetyl helvolic acid 21,16-lactone and compounds from this BGC
1	28	Helvolic acid 1	13	BGC0000686	yes	reported	(Lv et al. 2017)	MIBiG/known	correct
1	1	Pyripyropene F 3	14	BGC0000129, BGC0001068	yes	predicted	(Itoh et al. 2010)	–/additional	i	high structural similarity between Pyripyropene FHIO and pyripyropene A
1	2	Pyripyropene H 3	14	BGC0000129, BGC0001068	yes	predicted	(Itoh et al. 2010)	–/additional	i	high structural similarity between Pyripyropene FHIO and pyripyropene A
1	3	Pyripyropene I 3	14	BGC0000129, BGC0001068	yes	predicted	(Itoh et al. 2010)	–/additional	i	high structural similarity between Pyripyropene FHIO and pyripyropene A
1	4	Pyripyropene O 3	14	BGC0000129, BGC0001068	yes	predicted	(Itoh et al. 2010)	–/additional	i	high structural similarity between Pyripyropene FHIO and pyripyropene A
1	51	Azonapyrone A 2	15	BGC0002604	yes	predicted	(Wang et al. 2019)	–/additional	i	Azonapyrone A is a cyclised version of sartorypyrone A
1	52	Sartorypyrone A 1	15	BGC0002604	yes	reported	(Wang et al. 2019)	MIBiG/known	correct
1	40	Circumdatin C 1	16	BGC0000355, BGC0001652, BGC0000448, BGC0000409, BGC0000303 (New BGC 5)	no	predicted		–/new	iii	partial similarity of compounds with products of several BGCs. BGC0001652 (18 genes) not present, no tentative regions. BGC0000448 (17 genes) not present but region of 5 genes matching 2 BGC core synthesis genes exist (DTO10_FUN_006047, DTO10_FUN_006049, DTO10_FUN_006050, DTO10_FUN_006051 ~ ACN39014.1 tomA & ACN39015.1 tomB, region not previously classified as BGC), albeit with low identify. BGC0…
1	41	Dimetoxycircumdatin C 1	16	BGC0000355, BGC0001652, BGC0000448, BGC0000409, BGC0000303 (New BGC 5)	no	predicted		–/new	iii	partial similarity of compounds with products of several BGCs. BGC0001652 (18 genes) not present, no tentative regions. BGC0000448 (17 genes) not present but region of 5 genes matching 2 BGC core synthesis genes exist (DTO10_FUN_006047, DTO10_FUN_006049, DTO10_FUN_006050, DTO10_FUN_006051 ~ ACN39014.1 tomA & ACN39015.1 tomB, region not previously classified as BGC), albeit with low identify. BGC0…
1	37	Betaenone E 3	17	BGC0002165, BGC0001264 (New BGC 6)	no	predicted	(Li et al. 2019)	–/new	ii	New or very derived BGC (2); high structural similarity between betaenones EGHIJ and compounds from this BGC. BGC0001264 (8 genes) not present, no tentative regions. BGC0002165 (7 genes) not present but runs of several genes matching several BCG genes exist (SNOG_07866~DTO10_FUN_009035, SNOG_07864~DTO10_FUN_009036, SNOG_07861~DTO10_FUN_009039, region not previously classified as BGC).
3	38	Betaenone G/I/J 3	17	BGC0002165, BGC0001264 (New BGC 6)	no	predicted	(Li et al. 2019)	–/new	ii	New or very derived BGC (2); high structural similarity between betaenones EGHIJ and compounds from this BGC. BGC0001264 (8 genes) not present, no tentative regions. BGC0002165 (7 genes) not present but runs of several genes matching several BCG genes exist (SNOG_07866~DTO10_FUN_009035, SNOG_07864~DTO10_FUN_009036, SNOG_07861~DTO10_FUN_009039, region not previously classified as BGC).
1	39	Betaenone H 3	17	BGC0002165, BGC0001264 (New BGC 6)	no	predicted	(Li et al. 2019)	–/new	ii	New or very derived BGC (2); high structural similarity between betaenones EGHIJ and compounds from this BGC. BGC0001264 (8 genes) not present, no tentative regions. BGC0002165 (7 genes) not present but runs of several genes matching several BCG genes exist (SNOG_07866~DTO10_FUN_009035, SNOG_07864~DTO10_FUN_009036, SNOG_07861~DTO10_FUN_009039, region not previously classified as BGC).
1	36	Clavaric acid 3	18	BGC0001248	yes	reported	(Godio, Fouces, and Martín 2007; Godio and Martín 2009)	MIBiG/known	correct
1	29	Chaetoglobosin 542 3	19	BGC0002539, BGC0000968, BGC0001182	yes	predicted	(Perlatti et al. 20202)	MIBiG/additional	i	presence/absence pattern doesn't match BGC0000968; set of genes with second best match available; 6/8 of the BGCs on starships. BGC0000968 present but the presence/absence pattern of BGC and SM do not match.
1	33	Neosartoricin 3	20	BGC0001144	yes	reported	(Yin, Chooi, et al. 2013; Chooi et al. 2013)	MIBiG/known	correct
1	34	Neosartoricin C 3	20	BGC0001144	yes	reported	(Yin, Chooi, et al. 2013; Chooi et al. 2013)	primlit/additional*	correct	biosynthetic hypothesis reported in primary literature; this compound is likely a known artefact of neosartoricin B
1	35	Neosartoricin D 3	20	BGC0001144	yes	reported	(Yin, Chooi, et al. 2013; Chooi et al. 2013)	primlit/additional*	correct	biosynthetic hypothesis reported in primary literature; this compound is likely a known artefact of neosartoricin B
1	45	Brevianamide L 3	21	BGC0002208, BGC0002242 (New BGC 7)	no	predicted	(Zheng et al. 2021)	–/new	ii	High structural similarity between brevianamides LOP and oxepinamide F. BGC0002208 (6 genes) not present but several regions of interest exist (DTO10_FUN_003576, DTO10_FUN_003577, DTO10_FUN_003580, DTO10_FUN_003582, DTO10_FUN_003583 ~ HK57_00060 & HK57_00063 & HK57_00065, some genes putatively classified as BGC000355); (DTO10_FUN_006047-DTO10_FUN_006051 ~ HK57_00065, region not previously classif…
1	46	Brevianamide O 3	21	BGC0002208, BGC0002242 (New BGC 7)	no	predicted	(Zheng et al. 2021)	–/new	ii	High structural similarity between brevianamides LOP and oxepinamide F. BGC0002208 (6 genes) not present but several regions of interest exist (DTO10_FUN_003576, DTO10_FUN_003577, DTO10_FUN_003580, DTO10_FUN_003582, DTO10_FUN_003583 ~ HK57_00060 & HK57_00063 & HK57_00065, some genes putatively classified as BGC000355); (DTO10_FUN_006047-DTO10_FUN_006051 ~ HK57_00065, region not previously classif…
1	47	Brevianamide P 3	21	BGC0002208, BGC0002242 (New BGC 7)	no	predicted	(Zheng et al. 2021)	–/new	ii	High structural similarity between brevianamides LOP and oxepinamide F. BGC0002208 (6 genes) not present but several regions of interest exist (DTO10_FUN_003576, DTO10_FUN_003577, DTO10_FUN_003580, DTO10_FUN_003582, DTO10_FUN_003583 ~ HK57_00060 & HK57_00063 & HK57_00065, some genes putatively classified as BGC000355); (DTO10_FUN_006047-DTO10_FUN_006051 ~ HK57_00065, region not previously classif…
9	42	Secalonic acids (A/ B/ C/ D/ E/ F/ F1/ G; 4,4'-Secalonic acid E) 3	22	BGC0002063, BGC0001886, BGC0001988	yes	reported	(Neubauer et al. 2016)	primlit/known*	correct	MIBiG has the BGC entry but without structures of exact secalonic acid(s) produced; data in this work does not resolve structures either.
1	50	Nidiascin C 2	23	BGC0002275, BGC0002171 (New BGC 8)	no	predicted		–/new	iii	partial similarity of compound with products of several BGCs. BGC0002275 (2 genes) not present, one gene produces hits but none of reasonable identity and coverage. BGC0002171 (2 genes) not present, one gene produces hits but none of reasonable identity and coverage.
1	44	Neosartorin 2	24	BGC0001988	yes	reported	(Matsuda, Gotfredsen, and Larsen 2018)	MIBiG/known	correct
1	21	Bisdethiobis(methylthio)gliotoxin 2	25	BGC0000361	yes	reported	(Dolan et al. 2015)	primlit/known	correct	BGC not in MIBiG (3.1)
1	22	Gliotoxin 2	25	BGC0000361	yes	reported	(Dolan et al. 2015)	primlit/known	correct	BGC not in MIBiG (3.1)
	n.d.	Pseurotin		BGC0001037						Not previously reported in A. fischeri, BGC not detected.
	n.d.	Trypacidin		BGC0001403			(Mattern et al. 2015)			Previously reported in A. fischeri, BGC present.
	column 'feature (SM)': 1 compound was isolated and characterized by MS/MS and NMR; 2 compound identified by MS/MS and compared with a standard and in-house database (dereplication), both these categories are denoted by a superscript "A" in the main manuscript; 3 compound was putatively identified only by MS/MS analysis, denotes by a superscript "B" in the main manuscript.
	column 'BGC link' lists the closest BGCs in the hierarchical clustering. Where several BGCs listed, the one producing the highest Tanimoto similarity is underlined.
	column 'confidence': "reported" if there is evidence for the link in primary literature/MIBiG; "predicted" if there was no experimental evidence for the biosynthesis of this compound.
	column 'BGC present': classification of the BGC as "present" (all genes present, or partial presence with evidence from a linked SM (see this table)), or "present, putative" when the is no documented evidence for the link and the BGC is incomplete with more than 50% of the genes detected, "no" if the linked BGCs were not detected.
75	sum putative SMs		21	reported
60	total number of features		37	predicted
		of those predicted:	13	predicted with BGC (i)
			24	predicted w/o BGC (ii & iii)
			11	divereged BGC (ii)
			13	new BGC (iii)
				BGC present + putative	38	0.644068	%
				BGC not present	21	0.355932	%

## Sheet: Table S2 Similarity scores
ACHIRAL FINGERPRINT HIGHEST TANIMOTO SIMILARITY OF EXPERIMENTAL SM WITH MIBiG					CHIRAL FINGERPRINT HIGHEST TANIMOTO SIMILARITY OF EXPERIMENTAL SM WITH MIBiG
experimental SM	non-chiral closest match in MIBiG v3.1 with ties	achiral Tanimoto similarity			Experimental SM	Highest similarity match MIBiGv3.1	Tanimoto similarity chiral
Acetylaszonalenin	BGC0000293_acetylaszonalenin	1			chem_Acetylaszonalenin	BGC0000293_acetylaszonalenin	1
Acetylaszonalenin	BGC0002272_epi-aszonalenin A	1			chem_Brevianamide F	BGC0000356_brevianamide F	1
Brevianamide F	BGC0000356_brevianamide F	1			chem_Clavaric acid	BGC0001248_clavaric acid	1
Clavaric acid	BGC0001248_clavaric acid	1			chem_Fumagillol	BGC0001067_fumagillol	1
Fumagillol	BGC0001067_fumagillol	1			chem_Fumitremorgin B	BGC0000356_fumitremorgin B	1
Fumitremorgin B	BGC0000356_fumitremorgin B	1			chem_Fumitremorgin C	BGC0000356_fumitremorgin c	1
Fumitremorgin C	BGC0000356_fumitremorgin c	1			chem_Neosartorin	BGC0001988_neosartorin	1
Isoroquefortine C	BGC0000420_roquefortine C	1			chem_Roquefortine C	BGC0000420_roquefortine C	1
Neosartorin	BGC0001988_neosartorin	1			chem_Sartorypyrone A	BGC0002604_sartorypyrone A	1
Roquefortine C	BGC0000420_roquefortine C	1			chem_Tryprostatin B	BGC0000356_tryprostatin B	1
Sartorypyrone A	BGC0002604_sartorypyrone A	1			chem_Verruculogen	BGC0000356_verruculogen	1
Tryprostatin B	BGC0000356_tryprostatin B	1			chem_13-O-prenylfumitremorgin B	BGC0000356_fumitremorgin B	0.835616
Verruculogen	BGC0000356_verruculogen	1			chem_Pyripyropene I	BGC0000129_pyripyropene A	0.822785
13-O-prenylfumitremorgin B	BGC0000356_fumitremorgin B	0.849315			chem_Fumitremorgin A	BGC0000356_verruculogen	0.8125
Pyripyropene I	BGC0000129_pyripyropene A	0.82716			chem_hexadehydroastechrome monomer	BGC0000372_hexadehydroastechrome	0.787879
Pyripyropene I	BGC0001068_pyripyropene A	0.82716			chem_Betaenone E	BGC0002165_compound 6	0.76
Fumitremorgin A	BGC0000356_verruculogen	0.825			chem_Tryprostatin C	BGC0000356_tryprostatin A	0.714286
Betaenone H	BGC0002165_probetaenone I	0.788462			chem_Tryprostatin D	BGC0000356_tryprostatin A	0.714286
Betaenone H	BGC0002165_dehydroprobetaenone I	0.788462			chem_Betaenone H	BGC0002165_probetaenone I	0.690909
hexadehydroastechrome monomer	BGC0000372_hexadehydroastechrome	0.787879			chem_Aszonalenin	BGC0000293_acetylaszonalenin	0.677419
Brevianamide L	BGC0002208_oxepinamide F	0.784615			chem_Brevianamide L	BGC0002208_oxepinamide F	0.671429
Betaenone E	BGC0002165_betaenone C	0.77551			chem_Isoroquefortine C	BGC0000420_roquefortine C	0.666667
Betaenone E	BGC0002165_compound 4	0.77551			chem_Ilicicolin E	BGC0001923_ascochlorin	0.650794
Betaenone E	BGC0001264_betaenone C	0.77551			chem_Pyripyropene O	BGC0000129_pyripyropene A	0.647059
Tryprostatin C	BGC0000356_tryprostatin A	0.714286			chem_Deoxybrevianamide E	BGC0000356_tryprostatin B	0.646154
Tryprostatin D	BGC0000356_tryprostatin A	0.714286			chem_Neosartoricin	BGC0001144_neosartoricin B	0.625
Betaenone J	BGC0002165_probetaenone I	0.672727			chem_Fumitremorgin L	BGC0001142_tryptoquialanine	0.623377
Betaenone J	BGC0002165_dehydroprobetaenone I	0.672727			chem_Neosartoricin C	BGC0001144_neosartoricin B	0.614286
Aszonalenin	BGC0000293_acetylaszonalenin	0.666667			chem_Betaenone J	BGC0002165_probetaenone I	0.603448
Aszonalenin	BGC0002272_epi-aszonalenin A	0.666667			chem_Cottoquinazoline G	BGC0000355_fumiquinazoline C	0.6
Cottoquinazoline E	BGC0000355_fumiquinazoline D	0.661972			chem_Pyripyropene H	BGC0000129_pyripyropene A	0.597701
Neosartoricin	BGC0001144_neosartoricin B	0.661972			chem_Cottoquinazoline E	BGC0000355_fumiquinazoline D	0.586667
Cottoquinazoline G	BGC0000355_fumiquinazoline C	0.657534			chem_4-Hydroxyaszonalenin	BGC0000293_acetylaszonalenin	0.585714
Ilicicolin E	BGC0001923_ascochlorin	0.65625			chem_Secalonic acid F1	BGC0001988_neosartorin	0.580247
Deoxybrevianamide E	BGC0000356_tryprostatin B	0.646154			chem_Cottoquinazoline F	BGC0000355_fumiquinazoline C	0.578947
Pyripyropene O	BGC0000129_pyripyropene A	0.643678			chem_Brevianamide O	BGC0002242_oxepinamide D	0.571429
Pyripyropene O	BGC0001068_pyripyropene A	0.643678			chem_Betaenone I	BGC0002165_compound 6	0.566667
Fumitremorgin G	BGC0001142_tryptoquialanine	0.623377			chem_Fumitremorgin G	BGC0001142_tryptoquialanine	0.5625
Fumitremorgin L	BGC0001142_tryptoquialanine	0.623377			chem_Azonapyrone A	BGC0002604_sartorypyrone A	0.551282
Neosartoricin C	BGC0001144_neosartoricin B	0.614286			chem_Neosartoricin D	BGC0001144_neosartoricin B	0.54054
Cottoquinazoline F	BGC0000355_fumiquinazoline C	0.613333			chem_Secalonic acid D	BGC0001988_neosartorin	0.526316
Chaetoglobosin 542	BGC0002539_chaetoglobosin K	0.595745			chem_Secalonic acid B	BGC0001988_neosartorin	0.519481
Chaetoglobosin 542	BGC0000968_chaetoglobosin A	0.595745			chem_Secalonic acid F	BGC0001988_neosartorin	0.5
Chaetoglobosin 542	BGC0001182_chaetoglobosins	0.595745			chem_spiro[5H,10H-dipyrrolo-[1,2-a:1′,2′-d]pyrazine-2-(3H),2′-[2H]-indole]-3′,5,10(1′H)trione	BGC0000356_fumitremorgin B	0.488095
Pyripyropene H	BGC0000129_pyripyropene A	0.595506			chem_Fumitremorgin F	BGC0000355_fumiquinazoline C	0.487179
Pyripyropene H	BGC0001068_pyripyropene A	0.595506			chem_Chaetoglobosin 542	BGC0002539_chaetoglobosin K	0.485148
Fumitremorgin F	BGC0000355_fumiquinazoline C	0.589041			chem_Betaenone G	BGC0002165_probetaenone I	0.484375
Brevianamide O	BGC0002242_oxepinamide D	0.57971			chem_Brevianamide P	BGC0002242_oxepinamide D	0.472222
4-Hydroxyaszonalenin	BGC0000293_acetylaszonalenin	0.577465			chem_Pyripyropene F	BGC0000129_pyripyropene A	0.468085
4-Hydroxyaszonalenin	BGC0002272_epi-aszonalenin A	0.577465			chem_Secalonic acid C	BGC0001988_neosartorin	0.465116
Betaenone G	BGC0002165_probetaenone I	0.566667			chem_Nidiascin C	BGC0002171_pyrophen	0.439394
Betaenone G	BGC0002165_dehydroprobetaenone I	0.566667			chem_Helvolic acid	BGC0000686_helvolic acid	0.419355
Betaenone I	BGC0002165_probetaenone I	0.566667			chem_Secalonic acid A	BGC0002063_cryptosporioptide A	0.414286
Betaenone I	BGC0002165_compound 6	0.566667			chem_Secalonic acid E	BGC0002063_cryptosporioptide A	0.414286
Betaenone I	BGC0002165_dehydroprobetaenone I	0.566667			chem_Secalonic acid G	BGC0002063_cryptosporioptide A	0.391892
Betaenone I	BGC0001264_betaenone B	0.566667			chem_Circumdatin C	BGC0000355_fumiquinazoline A	0.383562
Azonapyrone A	BGC0002604_sartorypyrone A	0.558442			chem_Brevianamide V	BGC0000356_tryprostatin B	0.371795
Neosartoricin D	BGC0001144_neosartoricin B	0.540541			chem_4,4'-Secalonic acid E	BGC0001988_neosartorin	0.364706
spiro[5H,10H-dipyrrolo-[1,2-a:1′,2′-d]pyrazine-2-(3H),2′-[2H]-indole]-3′,5,10(1′H)trione	BGC0000356_fumitremorgin B	0.5			chem_Trihistatin	BGC0000420_roquefortine C	0.356322
Brevianamide A	BGC0001084_notoamide A	0.474359			chem_Gliotoxin	BGC0001044_sirodesmin PL	0.355263
Brevianamide A	BGC0000818_notoamide A	0.474359			chem_Brevianamide E	BGC0002272_asterrelenin	0.353658
Brevianamide A	BGC0002254_notoamide A	0.474359			chem_Brevianamide W	BGC0000356_demethoxyfumitremorgin C	0.333333
Brevianamide B	BGC0001084_notoamide A	0.474359			chem_Brevianamide U	BGC0000442_terrequinone A	0.325581
Brevianamide B	BGC0000818_notoamide A	0.474359			chem_Brevianamide T	BGC0000442_terrequinone A	0.325
Brevianamide B	BGC0002254_notoamide A	0.474359			chem_Brevianamide Q	BGC0000442_terrequinone A	0.317647
Brevianamide P	BGC0002242_oxepinamide D	0.465753			chem_16-O-deacetyl helvolic acid 21,16-lactone	BGC0000686_helvolic acid	0.316832
Pyripyropene F	BGC0000129_pyripyropene A	0.458333			chem_Brevianamide K	BGC0000442_terrequinone A	0.313253
Pyripyropene F	BGC0001068_pyripyropene A	0.458333			chem_Brevianamide R	BGC0000442_terrequinone A	0.298851
Nidiascin C	BGC0002171_pyrophen	0.446154			chem_Brevianamide A	BGC0001084_notoamide A	0.280899
Nidiascin C	BGC0002275_pyrophen	0.446154			chem_Brevianamide B	BGC0001084_notoamide A	0.280899
Helvolic acid	BGC0000686_helvolic acid	0.445652			chem_Dimetoxycircumdatin C	BGC0000355_fumiquinazoline A	0.26506
Circumdatin C	BGC0000355_fumiquinazoline A	0.378378			chem_Brevianamide C	BGC0002617_psychrophilin I	0.256098
Brevianamide V	BGC0000356_tryprostatin B	0.371795			chem_Brevianamide D	BGC0002617_psychrophilin I	0.256098
Brevianamide W	BGC0000356_tryprostatin B	0.371795			chem_(3β,22E)-Ergosta-4,6,8(14),22-tetraene-3-ol	BGC0000675_(+)-T-muurolol	0.230769
16-O-deacetyl helvolic acid 21,16-lactone	BGC0000686_helvolic acid	0.371134			chem_Bisdethiobis(methylthio)gliotoxin	BGC0000292_acetylaranotin	0.225352
Trihistatin	BGC0000420_roquefortine C	0.367816
Brevianamide U	BGC0001126_ambiguine C isonitrile	0.353659
Brevianamide E	BGC0000293_acetylaszonalenin	0.341463
Brevianamide E	BGC0002272_epi-aszonalenin A	0.341463
Brevianamide Q	BGC0001612_ambiguine H isonitrile	0.329268
Brevianamide Q	BGC0001126_ambiguine C isonitrile	0.329268
Brevianamide R	BGC0001612_ambiguine H isonitrile	0.325301
Brevianamide T	BGC0000442_terrequinone A	0.325
Brevianamide K	BGC0000442_terrequinone A	0.313253
Brevianamide C	BGC0001084_notoamide A	0.303371
Brevianamide C	BGC0000818_notoamide A	0.303371
Brevianamide C	BGC0002254_notoamide A	0.303371
Dimetoxycircumdatin C	BGC0000355_fumiquinazoline A	0.261905
Brevianamide D	BGC0002617_psychrophilin I	0.256098
(3β,22E)-Ergosta-4,6,8(14),22-tetraene-3-ol	BGC0000670_thalianol	0.21519
4,4'-Secalonic acid E
Bisdethiobis(methylthio)gliotoxin
Gliotoxin
Secalonic acid A
Secalonic acid B
Secalonic acid C
Secalonic acid D
Secalonic acid E
Secalonic acid F
Secalonic acid F1
Secalonic acid G

## Sheet: Table S3 BGCs in A. fischeri
	Tab S2: Classification of antiSMASH named, predicted BGCs.
#	candidate BGC accession	candidate BGC name	BGC classification across all A. fischeri genomes	BGC completeness	BGC certainty	sanity check	discovery	N genes in BGC	consistent or not	SM certain	SM putative	BGC group
1	BGC0000007	aflatoxin	absent	absent	absent	FP	antiSMASH v7	25	n			5
2	BGC0000129	pyripyropene A	present	complete	present	TP	antiSMASH v7	9	y		y	53
3	BGC0000161	isoterrein	absent	absent	absent	FP	antiSMASH v7	10	n			39
4	BGC0000293	acetylaszonalenin	present	complete	present	TP	antiSMASH v7	3	y	y		14
5	BGC0000307	AbT1	absent	absent	absent	FP	antiSMASH v7	1	n			39
6	BGC0000355	fumiquinazoline A	present	partial	putative	TP	other	4			y
7	BGC0000356	verruculogen	present	complete	present	TP	antiSMASH v7	9	y	y		56
8	BGC0000361	Gliotoxin	present	complete	present	TP	other	13		y
9	BGC0000372	hexadehydroastechrome	present	complete	present	TP	antiSMASH v7	8	y	y		7
10	BGC0000420	histidyl-tryptophanyl-diketopiperazine	present	partial	present	TP	antiSMASH v7	7	y	y		18
11	BGC0000667	PR-toxin	present	partial	putative	TP	antiSMASH v7	4	y			52
12	BGC0000673	pimara-8(14),15-diene	present	partial	putative	TP	other	3
13	BGC0000686	helvolic acid	present	complete	present	TP	antiSMASH v7	9	y	y		28
14	BGC0000959	aspyridone A	present	partial	putative	TP	antiSMASH v7	9	y			1
15	BGC0000968	chaetoglobosin A	present	complete	present	TP	antiSMASH v7	7	y			54
16	BGC0001067	fumagillin	present	partial	present	TP	antiSMASH v7	15	n	y		55
17	BGC0001118	endocrocin	present	complete	present	TP	antiSMASH v7	9	y			49
18	BGC0001144	neosartoricin B	present	complete	present	TP	other	5		y	y
19	BGC0001238	biotin	present	complete	present	TP	other	3
20	BGC0001239	biotin	present	complete	present	artifact: double	other	3
21	BGC0001248	clavaric acid	present	complete	present	TP	antiSMASH v7	1	y	y		20
22	BGC0001248	clavaric acid	present	complete	present	artifact: primary metabolism	antiSMASH v7	1	y	y		26
23	BGC0001252	UNII-YC2Q1O94PT	absent	absent	absent	FP	antiSMASH v7	1	n			11
24	BGC0001261	AM-toxin	absent	absent	absent	FP	antiSMASH v7	1	n			23
25	BGC0001290	emericellamide A	absent	absent	absent	FP	antiSMASH v7	5	n			39
26	BGC0001306	asperipin 2a	present	partial	putative	TP	antiSMASH v7	4	y			46
27	BGC0001358	leucinostatin A	absent	partial	absent	FP	antiSMASH v7	20	n			23
28	BGC0001403	trypacidin	present	complete	present	TP	antiSMASH v7	14	n			27
29	BGC0001405	chaetoviridin E	absent	absent	absent	FP	antiSMASH v7	18	n			59
30	BGC0001436	cornexistin	absent	partial	absent	FP	antiSMASH v7	21	n			2
31	BGC0001475	aspterric acid	present	complete	present	TP	antiSMASH v7	4	n			22 (22.1, 22.2, 22.3)
32	BGC0001609	gliovirin	present	complete	present	artifact: collision	other	8
33	BGC0001621	imizoquin A	present	partial	putative	TP	antiSMASH v7	10	n			30
34	BGC0001699	nidulanin A	present	complete	present	TP	antiSMASH v7	4	y			34
35	BGC0001839	squalestatin S1	present	partial	putative	TP	antiSMASH v7	5	y			35
36	BGC0001886	secalonic acids	present	partial	present	TP	other	16		y
37	BGC0001988	neosartorin	present	complete	present	TP	antiSMASH v7	19	y	y		63
38	BGC0001990	BU-4704	present	complete	present	TP	antiSMASH v7	7	y			21
39	BGC0002035	ilicicolin H	present	partial	putative	artifact: double	other	5
40	BGC0002093	ilicicolin H	present	partial	putative	TP	antiSMASH v7	8	y			62
41	BGC0002161	scytalone	present	partial	putative	TP	antiSMASH v7	5	n			29
42	BGC0002162	sesterfisherol	present	complete	present	TP	other	2
43	BGC0002164	peramine	absent	absent	absent	FP	antiSMASH v7	1	y			50
44	BGC0002175	YWA1	present	complete	present	TP	antiSMASH v7	1	n			29
45	BGC0002196	clavatol	absent	partial	absent	FP	antiSMASH v7	10	y			3
46	BGC0002222	zopfiellin	absent	partial	absent	FP	antiSMASH v7	12	n			2
47	BGC0002227	AKML B	present	complete	present	TP	antiSMASH v7	4	y			38
48	BGC0002264	hancockiamide E	present	partial	putative	TP	other	12
49	BGC0002267	azasperpyranone A	absent	partial	absent	FP	antiSMASH v7	16	n			4 (4.1, 4.2)
50	BGC0002276	choline	present	complete	present	TP	antiSMASH v7	1	y			19
51	BGC0002278	brasiliamide I	present	partial	putative	TP	antiSMASH v7	12	y			48
52	BGC0002604	sartorypyrone A	present	complete	present	TP	antiSMASH v7	6	y	y		42
53	BGC0002646	hancockinone A	present	partial	putative	artifact: collision	antiSMASH v7	6	y			37
54	BGC0002710	metachelin C	absent	absent	absent	FP	antiSMASH v7	8	n			6
55	BGC0002710	metachelin C	absent	absent	absent	FP	antiSMASH v7	8	y			31

## Sheet: Table S4 BGC information
qseqid	sseqid	pident	length	mismatch	gapopen	qstart	qend	sstart	send	evalue	bitscore	qcovhsp	qlen	slen	Strain	BGC_acc	Gene	IDX	Start	Stop	Contig	Strand	BGC_group	n_genes_BGC	BGC_classification	BGC_certainty	source	group_aS7	discovery
BGC0000959|c1|1-1964|-|ANIA_08408|Cytochrome_P450_monooxygenase_(Eurofung)|CBF80479.1	DTO10_FUN_010271-T1	83.9	248	35	1	245	492	1	243	1.22e-140	403	49.8	498	249	DTO10	BGC0000959	DTO10_FUN_010271	215811_1	146339	147884	scaffold_10	+	1	9	present	putative	verified	1	antiSMASH
BGC0000959|c1|1-1964|-|ANIA_08408|Cytochrome_P450_monooxygenase_(Eurofung)|CBF80479.1	DTO10_FUN_010270-T1	85.2	115	16	1	1	114	1	115	8.48e-60	191	22.9	498	124	DTO10	BGC0000959	DTO10_FUN_010270	215814_1	145273	145720	scaffold_10	+	1	9	present	putative	verified	1	antiSMASH
BGC0000959|c1|2331-3491|+|ANIA_08409|enoylreductase|CBF80481.1	DTO10_FUN_010269-T1	81.1	354	46	1	1	333	1	354	1.37e-211	580	100	333	354	DTO10	BGC0000959	DTO10_FUN_010269	215810_1	143779	144914	scaffold_10	-	1	9	present	putative	verified	1	antiSMASH
BGC0000959|c1|3694-5858|+|ANIA_08410|FAD-dependent_monooxygenase_(Eurofung)|CBF80483.1	DTO10_FUN_010268-T1	88.1	578	69	0	36	613	1	578	0	1056	92.6	624	580	DTO10	BGC0000959	DTO10_FUN_010268	215809_1	141575	143384	scaffold_10	-	1	9	present	putative	verified	1	antiSMASH
BGC0000959|c1|6974-8653|-|ANIA_08411|PKS-NRPS_hybrid|CBF80485.1	DTO10_FUN_010266-T1	85.1	268	22	1	22	289	92	341	5.72e-170	482	51.6	519	341	DTO10	BGC0000959	DTO10_FUN_010266	229235_1	138968	140103	scaffold_10	+	1	9	present	putative	verified	1	antiSMASH
BGC0000959|c1|6974-8653|-|ANIA_08411|PKS-NRPS_hybrid|CBF80485.1	DTO10_FUN_010267-T1	94	149	9	0	371	519	1	149	5.65e-102	301	28.7	519	149	DTO10	BGC0000959	DTO10_FUN_010267	215808_1	140344	140862	scaffold_10	+	1	9	present	putative	verified	1	antiSMASH
BGC0000959|c1|9129-21064|+|ANIA_08412|hybrid_PKS-NRPS_(Eurofung)|CBF80487.1	DTO10_FUN_010265-T1	83	2512	347	8	1	2459	1	2484	0	4094	62.6	3930	2484	DTO10	BGC0000959	DTO10_FUN_010265	229236_1	131178	138765	scaffold_10	-	1	9	present	putative	verified	1	antiSMASH
BGC0000959|c1|9129-21064|+|ANIA_08412|hybrid_PKS-NRPS_(Eurofung)|CBF80487.1	DTO10_FUN_010264-T1	85.8	1024	143	2	2504	3527	1	1022	0	1724	26.1	3930	1022	DTO10	BGC0000959	DTO10_FUN_010264	229237_1	128064	131132	scaffold_10	-	1	9	present	putative	verified	1	antiSMASH
BGC0000959|c1|9129-21064|+|ANIA_08412|hybrid_PKS-NRPS_(Eurofung)|CBF80487.1	DTO10_FUN_010263-T1	83.2	398	66	1	3533	3929	1	398	2.31e-209	642	10.1	3930	399	DTO10	BGC0000959	DTO10_FUN_010263	215804_1	126852	128051	scaffold_10	-	1	9	present	putative	verified	1	antiSMASH
BGC0000959|c1|21348-23552|-|ANIA_08413|Exporter_(Eurofung)|CBF80489.1	DTO10_FUN_010261-T1	94.6	410	22	0	1	410	1	410	2.39e-277	756	84.2	487	419	DTO10	BGC0000959	DTO10_FUN_010261	215802_1	123536	125195	scaffold_10	+	1	9	present	putative	verified	1	antiSMASH
BGC0000959|c1|1-1964|-|ANIA_08408|Cytochrome_P450_monooxygenase_(Eurofung)|CBF80479.1	DTO11_FUN_000114-T1	81.5	454	65	3	1	440	1	449	2.83e-258	711	88.4	498	477	DTO11	BGC0000959	DTO11_FUN_000114	215813_1	299623	301469	scaffold_1	+	1	9	present	putative	verified	1	antiSMASH
BGC0000959|c1|2331-3491|+|ANIA_08409|enoylreductase|CBF80481.1	DTO11_FUN_000113-T1	80.8	354	47	1	1	333	1	354	1.09e-210	578	100	333	354	DTO11	BGC0000959	DTO11_FUN_000113	215810_1	298127	299262	scaffold_1	-	1	9	present	putative	verified	1	antiSMASH
BGC0000959|c1|3694-5858|+|ANIA_08410|FAD-dependent_monooxygenase_(Eurofung)|CBF80483.1	DTO11_FUN_000112-T1	84.4	578	74	1	36	613	1	562	0	1001	92.6	624	564	DTO11	BGC0000959	DTO11_FUN_000112	215809_1	295922	297732	scaffold_1	-	1	9	present	putative	verified	1	antiSMASH
BGC0000959|c1|6974-8653|-|ANIA_08411|PKS-NRPS_hybrid|CBF80485.1	DTO11_FUN_000111-T1	89.2	381	41	0	1	381	2	382	3.01e-263	720	73.4	519	383	DTO11	BGC0000959	DTO11_FUN_000111	215807_1	293525	295166	scaffold_1	+	1	9	present	putative	verified	1	antiSMASH
BGC0000959|c1|9129-21064|+|ANIA_08412|hybrid_PKS-NRPS_(Eurofung)|CBF80487.1	DTO11_FUN_000110-T1	82.5	3580	518	10	1	3527	1	3526	0	5767	89.7	3930	3526	DTO11	BGC0000959	DTO11_FUN_000110	228060_1	282403	293111	scaffold_1	-	1	9	present	putative	verified	1	antiSMASH
BGC0000959|c1|9129-21064|+|ANIA_08412|hybrid_PKS-NRPS_(Eurofung)|CBF80487.1	DTO11_FUN_000109-T1	82.9	398	67	1	3533	3929	1	398	4.17e-209	641	10.1	3930	399	DTO11	BGC0000959	DTO11_FUN_000109	215804_1	281191	282390	scaffold_1	-	1	9	present	putative	verified	1	antiSMASH
BGC0000959|c1|21348-23552|-|ANIA_08413|Exporter_(Eurofung)|CBF80489.1	DTO11_FUN_000107-T1	94.9	410	21	0	1	410	1	410	5.73e-278	758	84.2	487	419	DTO11	BGC0000959	DTO11_FUN_000107	215802_1	277529	279626	scaffold_1	+	1	9	present	putative	verified	1	antiSMASH
BGC0000959|c1|24378-26666|+|ANIA_08414|Putative_Zn(II)2Cys6_transcription_factor_(Eurofung)|CBF80491.1	DTO11_FUN_000105-T1	80.8	531	69	3	1	498	1	531	3.88e-305	844	68.2	730	597	DTO11	BGC0000959	DTO11_FUN_000105	215800_1	271333	273126	scaffold_1	+	1	9	present	putative	verified	1	antiSMASH
BGC0000959|c1|1-1964|-|ANIA_08408|Cytochrome_P450_monooxygenase_(Eurofung)|CBF80479.1	DTO12_FUN_010126-T1	82.6	506	69	3	1	492	1	501	2.01e-296	808	98.8	498	507	DTO12	BGC0000959	DTO12_FUN_010126	215811_1	336233	338169	scaffold_12	+	1	9	present	putative	verified	1	antiSMASH
BGC0000959|c1|2331-3491|+|ANIA_08409|enoylreductase|CBF80481.1	DTO12_FUN_010125-T1	80.8	354	47	1	1	333	1	354	1.16e-210	578	100	333	354	DTO12	BGC0000959	DTO12_FUN_010125	215810_1	334737	335872	scaffold_12	-	1	9	present	putative	verified	1	antiSMASH
BGC0000959|c1|3694-5858|+|ANIA_08410|FAD-dependent_monooxygenase_(Eurofung)|CBF80483.1	DTO12_FUN_010124-T1	84.4	578	74	1	36	613	1	562	0	1001	92.6	624	564	DTO12	BGC0000959	DTO12_FUN_010124	215809_1	332532	334342	scaffold_12	-	1	9	present	putative	verified	1	antiSMASH
BGC0000959|c1|6974-8653|-|ANIA_08411|PKS-NRPS_hybrid|CBF80485.1	DTO12_FUN_010123-T1	85.3	463	68	0	1	463	2	464	2.47e-303	825	89.2	519	472	DTO12	BGC0000959	DTO12_FUN_010123	215807_1	330135	331913	scaffold_12	+	1	9	present	putative	verified	1	antiSMASH
BGC0000959|c1|9129-21064|+|ANIA_08412|hybrid_PKS-NRPS_(Eurofung)|CBF80487.1	DTO12_FUN_010122-T1	83.4	3580	513	8	1	3527	1	3552	0	5854	89.7	3930	3552	DTO12	BGC0000959	DTO12_FUN_010122	228060_1	319014	329721	scaffold_12	-	1	9	present	putative	verified	1	antiSMASH
BGC0000959|c1|9129-21064|+|ANIA_08412|hybrid_PKS-NRPS_(Eurofung)|CBF80487.1	DTO12_FUN_010121-T1	83.4	398	65	1	3533	3929	1	398	1.47e-210	645	10.1	3930	399	DTO12	BGC0000959	DTO12_FUN_010121	215804_1	317802	319001	scaffold_12	-	1	9	present	putative	verified	1	antiSMASH
BGC0000959|c1|21348-23552|-|ANIA_08413|Exporter_(Eurofung)|CBF80489.1	DTO12_FUN_010119-T1	94.6	410	22	0	1	410	1	410	1e-276	754	84.2	487	419	DTO12	BGC0000959	DTO12_FUN_010119	215802_1	313783	316208	scaffold_12	+	1	9	present	putative	verified	1	antiSMASH
BGC0000959|c1|24378-26666|+|ANIA_08414|Putative_Zn(II)2Cys6_transcription_factor_(Eurofung)|CBF80491.1	DTO12_FUN_010117-T1	80.6	531	70	3	1	498	1	531	2.73e-303	839	68.2	730	597	DTO12	BGC0000959	DTO12_FUN_010117	215800_1	307930	309723	scaffold_12	+	1	9	present	putative	verified	1	antiSMASH
BGC0000959|c1|1-1964|-|ANIA_08408|Cytochrome_P450_monooxygenase_(Eurofung)|CBF80479.1	DTO13_FUN_001887-T1	81.5	454	65	3	1	440	1	449	2.86e-258	711	88.4	498	477	DTO13	BGC0000959	DTO13_FUN_001887	215814_1	285911	287757	scaffold_2	+	1	9	present	putative	verified	1	antiSMASH
BGC0000959|c1|2331-3491|+|ANIA_08409|enoylreductase|CBF80481.1	DTO13_FUN_001886-T1	80.8	354	47	1	1	333	1	354	1.1e-210	578	100	333	354	DTO13	BGC0000959	DTO13_FUN_001886	215810_1	284415	285550	scaffold_2	-	1	9	present	putative	verified	1	antiSMASH
BGC0000959|c1|3694-5858|+|ANIA_08410|FAD-dependent_monooxygenase_(Eurofung)|CBF80483.1	DTO13_FUN_001885-T1	84.4	578	74	1	36	613	1	562	0	1001	92.6	624	564	DTO13	BGC0000959	DTO13_FUN_001885	215809_1	282210	284020	scaffold_2	-	1	9	present	putative	verified	1	antiSMASH
BGC0000959|c1|6974-8653|-|ANIA_08411|PKS-NRPS_hybrid|CBF80485.1	DTO13_FUN_001884-T1	85.3	463	68	0	1	463	2	464	2.35e-303	825	89.2	519	472	DTO13	BGC0000959	DTO13_FUN_001884	215807_1	279808	281487	scaffold_2	+	1	9	present	putative	verified	1	antiSMASH
BGC0000959|c1|9129-21064|+|ANIA_08412|hybrid_PKS-NRPS_(Eurofung)|CBF80487.1	DTO13_FUN_001883-T1	82.3	3580	524	11	1	3527	1	3524	0	5744	89.7	3930	3524	DTO13	BGC0000959	DTO13_FUN_001883	228060_1	268691	279399	scaffold_2	-	1	9	present	putative	verified	1	antiSMASH
BGC0000959|c1|9129-21064|+|ANIA_08412|hybrid_PKS-NRPS_(Eurofung)|CBF80487.1	DTO13_FUN_001882-T1	82.9	398	67	1	3533	3929	1	398	4.21e-209	641	10.1	3930	399	DTO13	BGC0000959	DTO13_FUN_001882	215804_1	267479	268678	scaffold_2	-	1	9	present	putative	verified	1	antiSMASH
BGC0000959|c1|21348-23552|-|ANIA_08413|Exporter_(Eurofung)|CBF80489.1	DTO13_FUN_001880-T1	94.9	410	21	0	1	410	1	410	5.78e-278	758	84.2	487	419	DTO13	BGC0000959	DTO13_FUN_001880	215802_1	263493	265904	scaffold_2	+	1	9	present	putative	verified	1	antiSMASH
BGC0000959|c1|24378-26666|+|ANIA_08414|Putative_Zn(II)2Cys6_transcription_factor_(Eurofung)|CBF80491.1	DTO13_FUN_001878-T1	80.8	531	69	3	1	498	1	531	3.91e-305	844	68.2	730	597	DTO13	BGC0000959	DTO13_FUN_001878	215800_1	257619	259412	scaffold_2	+	1	9	present	putative	verified	1	antiSMASH
BGC0000959|c1|1-1964|-|ANIA_08408|Cytochrome_P450_monooxygenase_(Eurofung)|CBF80479.1	DTO14_FUN_010716-T1	82.7	473	63	3	1	459	1	468	5.43e-275	753	92.2	498	477	DTO14	BGC0000959	DTO14_FUN_010716	215813_1	605306	607152	scaffold_11	-	1	9	present	putative	verified	1	antiSMASH
BGC0000959|c1|2331-3491|+|ANIA_08409|enoylreductase|CBF80481.1	DTO14_FUN_010717-T1	81.1	354	46	1	1	333	1	354	1.4e-211	580	100	333	354	DTO14	BGC0000959	DTO14_FUN_010717	215810_1	607511	608646	scaffold_11	+	1	9	present	putative	verified	1	antiSMASH
BGC0000959|c1|3694-5858|+|ANIA_08410|FAD-dependent_monooxygenase_(Eurofung)|CBF80483.1	DTO14_FUN_010718-T1	78.5	578	52	1	36	613	1	506	0	908	92.6	624	508	DTO14	BGC0000959	DTO14_FUN_010718	215809_1	609041	610634	scaffold_11	+	1	9	present	putative	verified	1	antiSMASH
BGC0000959|c1|6974-8653|-|ANIA_08411|PKS-NRPS_hybrid|CBF80485.1	DTO14_FUN_010719-T1	90.9	519	47	0	1	519	2	520	0	1000	100	519	520	DTO14	BGC0000959	DTO14_FUN_010719	215808_1	611346	613032	scaffold_11	-	1	9	present	putative	verified	1	antiSMASH
BGC0000959|c1|9129-21064|+|ANIA_08412|hybrid_PKS-NRPS_(Eurofung)|CBF80487.1	DTO14_FUN_010722-T1	82.2	2333	391	6	1206	3527	1	2320	0	3723	59.1	3930	2320	DTO14	BGC0000959	DTO14_FUN_010722	215805_1	617027	624117	scaffold_11	+	1	9	present	putative	verified	1	antiSMASH
BGC0000959|c1|9129-21064|+|ANIA_08412|hybrid_PKS-NRPS_(Eurofung)|CBF80487.1	DTO14_FUN_010720-T1	91.7	853	71	0	1	853	1	853	0	1579	21.7	3930	889	DTO14	BGC0000959	DTO14_FUN_010720	215806_1	613446	616115	scaffold_11	+	1	9	present	putative	verified	1	antiSMASH
BGC0000959|c1|9129-21064|+|ANIA_08412|hybrid_PKS-NRPS_(Eurofung)|CBF80487.1	DTO14_FUN_010721-T1	76.6	188	44	0	985	1172	25	212	7.71e-90	291	4.8	3930	226	DTO14	BGC0000959	DTO14_FUN_010721	230424_1	616299	616979	scaffold_11	+	1	9	present	putative	verified	1	antiSMASH
BGC0000959|c1|24378-26666|+|ANIA_08414|Putative_Zn(II)2Cys6_transcription_factor_(Eurofung)|CBF80491.1	DTO14_FUN_010723-T1	76.6	372	54	3	1	339	1	372	4.7e-194	553	46.4	730	372	DTO14	BGC0000959	DTO14_FUN_010723	215800_1	624722	625840	scaffold_11	-	1	9	present	putative	verified	1	antiSMASH
BGC0000959|c1|1-1964|-|ANIA_08408|Cytochrome_P450_monooxygenase_(Eurofung)|CBF80479.1	DTO15_FUN_011172-T1	82.7	473	63	3	1	459	1	468	5.4e-275	753	92.2	498	477	DTO15	BGC0000959	DTO15_FUN_011172	215813_1	603953	605799	scaffold_12	-	1	9	present	putative	verified	1	antiSMASH
BGC0000959|c1|2331-3491|+|ANIA_08409|enoylreductase|CBF80481.1	DTO15_FUN_011173-T1	81.1	354	46	1	1	333	1	354	1.39e-211	580	100	333	354	DTO15	BGC0000959	DTO15_FUN_011173	215810_1	606158	607293	scaffold_12	+	1	9	present	putative	verified	1	antiSMASH
BGC0000959|c1|3694-5858|+|ANIA_08410|FAD-dependent_monooxygenase_(Eurofung)|CBF80483.1	DTO15_FUN_011174-T1	78.5	578	52	1	36	613	1	506	0	908	92.6	624	508	DTO15	BGC0000959	DTO15_FUN_011174	215809_1	607688	609281	scaffold_12	+	1	9	present	putative	verified	1	antiSMASH
BGC0000959|c1|6974-8653|-|ANIA_08411|PKS-NRPS_hybrid|CBF80485.1	DTO15_FUN_011175-T1	90.9	519	47	0	1	519	2	520	0	1000	100	519	520	DTO15	BGC0000959	DTO15_FUN_011175	215808_1	609993	611679	scaffold_12	-	1	9	present	putative	verified	1	antiSMASH
BGC0000959|c1|9129-21064|+|ANIA_08412|hybrid_PKS-NRPS_(Eurofung)|CBF80487.1	DTO15_FUN_011178-T1	82.2	2333	391	6	1206	3527	1	2320	0	3723	59.1	3930	2320	DTO15	BGC0000959	DTO15_FUN_011178	215805_1	615674	622764	scaffold_12	+	1	9	present	putative	verified	1	antiSMASH
BGC0000959|c1|9129-21064|+|ANIA_08412|hybrid_PKS-NRPS_(Eurofung)|CBF80487.1	DTO15_FUN_011176-T1	91.7	853	71	0	1	853	1	853	0	1579	21.7	3930	889	DTO15	BGC0000959	DTO15_FUN_011176	215806_1	612093	614762	scaffold_12	+	1	9	present	putative	verified	1	antiSMASH
BGC0000959|c1|9129-21064|+|ANIA_08412|hybrid_PKS-NRPS_(Eurofung)|CBF80487.1	DTO15_FUN_011177-T1	76.6	188	44	0	985	1172	28	215	8.51e-90	291	4.8	3930	229	DTO15	BGC0000959	DTO15_FUN_011177	230424_1	614937	615626	scaffold_12	+	1	9	present	putative	verified	1	antiSMASH
BGC0000959|c1|24378-26666|+|ANIA_08414|Putative_Zn(II)2Cys6_transcription_factor_(Eurofung)|CBF80491.1	DTO15_FUN_011179-T1	76.6	372	54	3	1	339	1	372	4.67e-194	553	46.4	730	372	DTO15	BGC0000959	DTO15_FUN_011179	215800_1	623369	624487	scaffold_12	-	1	9	present	putative	verified	1	antiSMASH
BGC0000959|c1|1-1964|-|ANIA_08408|Cytochrome_P450_monooxygenase_(Eurofung)|CBF80479.1	DTO16_FUN_010215-T1	85.3	360	48	1	133	492	1	355	2.19e-217	602	72.3	498	361	DTO16	BGC0000959	DTO16_FUN_010215	215811_1	306279	307576	scaffold_9	+	1	9	present	putative	verified	1	antiSMASH
BGC0000959|c1|1-1964|-|ANIA_08408|Cytochrome_P450_monooxygenase_(Eurofung)|CBF80479.1	DTO16_FUN_010214-T1	85.2	115	16	1	1	114	1	115	8.32e-60	191	22.9	498	124	DTO16	BGC0000959	DTO16_FUN_010214	215812_1	305640	306087	scaffold_9	+	1	9	present	putative	verified	1	antiSMASH
BGC0000959|c1|2331-3491|+|ANIA_08409|enoylreductase|CBF80481.1	DTO16_FUN_010213-T1	81.1	354	46	1	1	333	1	354	1.34e-211	580	100	333	354	DTO16	BGC0000959	DTO16_FUN_010213	215810_1	304146	305281	scaffold_9	-	1	9	present	putative	verified	1	antiSMASH
BGC0000959|c1|3694-5858|+|ANIA_08410|FAD-dependent_monooxygenase_(Eurofung)|CBF80483.1	DTO16_FUN_010212-T1	88.1	578	69	0	36	613	1	578	0	1056	92.6	624	580	DTO16	BGC0000959	DTO16_FUN_010212	215809_1	301942	303751	scaffold_9	-	1	9	present	putative	verified	1	antiSMASH
BGC0000959|c1|6974-8653|-|ANIA_08411|PKS-NRPS_hybrid|CBF80485.1	DTO16_FUN_010211-T1	91.1	519	46	0	1	519	2	520	0	1003	100	519	520	DTO16	BGC0000959	DTO16_FUN_010211	215808_1	299544	301230	scaffold_9	+	1	9	present	putative	verified	1	antiSMASH
BGC0000959|c1|9129-21064|+|ANIA_08412|hybrid_PKS-NRPS_(Eurofung)|CBF80487.1	DTO16_FUN_010208-T1	79.5	1484	242	5	2095	3527	1	1473	0	2237	36.5	3930	1473	DTO16	BGC0000959	DTO16_FUN_010208	229237_1	288434	292855	scaffold_9	-	1	9	present	putative	verified	1	antiSMASH
BGC0000959|c1|9129-21064|+|ANIA_08412|hybrid_PKS-NRPS_(Eurofung)|CBF80487.1	DTO16_FUN_010210-T1	85.1	1175	133	3	1	1172	1	1136	0	1988	29.8	3930	1150	DTO16	BGC0000959	DTO16_FUN_010210	215806_1	295572	299130	scaffold_9	-	1	9	present	putative	verified	1	antiSMASH
BGC0000959|c1|9129-21064|+|ANIA_08412|hybrid_PKS-NRPS_(Eurofung)|CBF80487.1	DTO16_FUN_010209-T1	81.9	854	152	2	1206	2057	1	853	0	1391	21.7	3930	868	DTO16	BGC0000959	DTO16_FUN_010209	227706_1	292918	295524	scaffold_9	-	1	9	present	putative	verified	1	antiSMASH
BGC0000959|c1|9129-21064|+|ANIA_08412|hybrid_PKS-NRPS_(Eurofung)|CBF80487.1	DTO16_FUN_010207-T1	82.9	398	67	1	3533	3929	1	398	2.26e-209	642	10.1	3930	399	DTO16	BGC0000959	DTO16_FUN_010207	215804_1	287222	288421	scaffold_9	-	1	9	present	putative	verified	1	antiSMASH
BGC0000959|c1|21348-23552|-|ANIA_08413|Exporter_(Eurofung)|CBF80489.1	DTO16_FUN_010205-T1	94.9	410	21	0	1	410	1	410	5.77e-278	758	84.2	487	419	DTO16	BGC0000959	DTO16_FUN_010205	215802_1	283571	285628	scaffold_9	+	1	9	present	putative	verified	1	antiSMASH
BGC0000959|c1|24378-26666|+|ANIA_08414|Putative_Zn(II)2Cys6_transcription_factor_(Eurofung)|CBF80491.1	DTO16_FUN_010203-T1	80.8	531	69	3	1	498	1	531	3.91e-305	844	68.2	730	597	DTO16	BGC0000959	DTO16_FUN_010203	215800_1	277358	279151	scaffold_9	+	1	9	present	putative	verified	1	antiSMASH
BGC0000959|c1|1-1964|-|ANIA_08408|Cytochrome_P450_monooxygenase_(Eurofung)|CBF80479.1	DTO1_FUN_000101-T1	81.5	454	65	3	1	440	1	449	4.21e-258	710	88.4	498	477	DTO1	BGC0000959	DTO1_FUN_000101	215813_1	247628	249474	scaffold_1	+	1	9	present	putative	verified	1	antiSMASH
BGC0000959|c1|2331-3491|+|ANIA_08409|enoylreductase|CBF80481.1	DTO1_FUN_000100-T1	80.8	354	47	1	1	333	1	354	1.15e-210	578	100	333	354	DTO1	BGC0000959	DTO1_FUN_000100	215810_1	246132	247267	scaffold_1	-	1	9	present	putative	verified	1	antiSMASH
BGC0000959|c1|3694-5858|+|ANIA_08410|FAD-dependent_monooxygenase_(Eurofung)|CBF80483.1	DTO1_FUN_000099-T1	84.4	578	74	1	36	613	1	562	0	1001	92.6	624	564	DTO1	BGC0000959	DTO1_FUN_000099	215809_1	243927	245737	scaffold_1	-	1	9	present	putative	verified	1	antiSMASH
BGC0000959|c1|6974-8653|-|ANIA_08411|PKS-NRPS_hybrid|CBF80485.1	DTO1_FUN_000098-T1	85.3	463	68	0	1	463	2	464	2.44e-303	825	89.2	519	472	DTO1	BGC0000959	DTO1_FUN_000098	215807_1	241530	243295	scaffold_1	+	1	9	present	putative	verified	1	antiSMASH
BGC0000959|c1|9129-21064|+|ANIA_08412|hybrid_PKS-NRPS_(Eurofung)|CBF80487.1	DTO1_FUN_000096-T1	80.3	2697	450	8	884	3527	10	2678	0	4207	67.3	3930	2678	DTO1	BGC0000959	DTO1_FUN_000096	215805_1	230410	238495	scaffold_1	-	1	9	present	putative	verified	1	antiSMASH
BGC0000959|c1|9129-21064|+|ANIA_08412|hybrid_PKS-NRPS_(Eurofung)|CBF80487.1	DTO1_FUN_000097-T1	91.7	723	60	0	1	723	1	723	0	1331	18.4	3930	777	DTO1	BGC0000959	DTO1_FUN_000097	215806_1	238783	241116	scaffold_1	-	1	9	present	putative	verified	1	antiSMASH
BGC0000959|c1|9129-21064|+|ANIA_08412|hybrid_PKS-NRPS_(Eurofung)|CBF80487.1	DTO1_FUN_000095-T1	82.9	398	67	1	3533	3929	1	398	4.36e-209	641	10.1	3930	399	DTO1	BGC0000959	DTO1_FUN_000095	215804_1	229198	230397	scaffold_1	-	1	9	present	putative	verified	1	antiSMASH
BGC0000959|c1|21348-23552|-|ANIA_08413|Exporter_(Eurofung)|CBF80489.1	DTO1_FUN_000093-T1	93.3	300	16	1	115	410	1	300	2.22e-192	536	60.8	487	309	DTO1	BGC0000959	DTO1_FUN_000093	215802_1	225551	227808	scaffold_1	+	1	9	present	putative	verified	1	antiSMASH
BGC0000959|c1|24378-26666|+|ANIA_08414|Putative_Zn(II)2Cys6_transcription_factor_(Eurofung)|CBF80491.1	DTO1_FUN_000091-T1	80.6	531	70	3	1	498	1	531	2.7e-303	839	68.2	730	597	DTO1	BGC0000959	DTO1_FUN_000091	215800_1	219095	221753	scaffold_1	+	1	9	present	putative	verified	1	antiSMASH
BGC0000959|c1|1-1964|-|ANIA_08408|Cytochrome_P450_monooxygenase_(Eurofung)|CBF80479.1	DTO2_FUN_005130-T1	85.3	360	48	1	133	492	1	355	2.18e-217	602	72.3	498	361	DTO2	BGC0000959	DTO2_FUN_005130	215811_1	4399202	4400499	scaffold_3	-	1	9	present	putative	verified	1	antiSMASH
BGC0000959|c1|1-1964|-|ANIA_08408|Cytochrome_P450_monooxygenase_(Eurofung)|CBF80479.1	DTO2_FUN_005131-T1	85.2	115	16	1	1	114	1	115	8.29e-60	191	22.9	498	124	DTO2	BGC0000959	DTO2_FUN_005131	215812_1	4400691	4401138	scaffold_3	-	1	9	present	putative	verified	1	antiSMASH
BGC0000959|c1|2331-3491|+|ANIA_08409|enoylreductase|CBF80481.1	DTO2_FUN_005132-T1	80.8	354	47	1	1	333	1	354	1.1e-210	578	100	333	354	DTO2	BGC0000959	DTO2_FUN_005132	215810_1	4401497	4402632	scaffold_3	+	1	9	present	putative	verified	1	antiSMASH
BGC0000959|c1|3694-5858|+|ANIA_08410|FAD-dependent_monooxygenase_(Eurofung)|CBF80483.1	DTO2_FUN_005133-T1	90.8	295	27	0	36	330	1	295	1.31e-200	562	47.3	624	298	DTO2	BGC0000959	DTO2_FUN_005133	215809_1	4403027	4403990	scaffold_3	+	1	9	present	putative	verified	1	antiSMASH
BGC0000959|c1|3694-5858|+|ANIA_08410|FAD-dependent_monooxygenase_(Eurofung)|CBF80483.1	DTO2_FUN_005134-T1	83.9	242	39	0	372	613	1	242	9.8e-146	421	38.8	624	244	DTO2	BGC0000959	DTO2_FUN_005134	215809_2	4404085	4404819	scaffold_3	+	1	9	present	putative	verified	1	antiSMASH
BGC0000959|c1|6974-8653|-|ANIA_08411|PKS-NRPS_hybrid|CBF80485.1	DTO2_FUN_005136-T1	89.2	352	38	0	1	352	2	353	5.17e-245	673	67.8	519	353	DTO2	BGC0000959	DTO2_FUN_005136	215807_1	4406098	4407216	scaffold_3	-	1	9	present	putative	verified	1	antiSMASH
BGC0000959|c1|6974-8653|-|ANIA_08411|PKS-NRPS_hybrid|CBF80485.1	DTO2_FUN_005135-T1	61.1	149	35	1	371	519	1	126	4.88e-50	166	28.7	519	126	DTO2	BGC0000959	DTO2_FUN_005135	215807_2	4405531	4406046	scaffold_3	-	1	9	present	putative	verified	1	antiSMASH
BGC0000959|c1|9129-21064|+|ANIA_08412|hybrid_PKS-NRPS_(Eurofung)|CBF80487.1	DTO2_FUN_005139-T1	79.4	2262	393	7	1319	3527	1	2243	0	3454	56.2	3930	2243	DTO2	BGC0000959	DTO2_FUN_005139	215805_1	4411572	4418364	scaffold_3	+	1	9	present	putative	verified	1	antiSMASH
BGC0000959|c1|9129-21064|+|ANIA_08412|hybrid_PKS-NRPS_(Eurofung)|CBF80487.1	DTO2_FUN_005137-T1	89.6	1172	121	1	1	1172	1	1171	0	2118	29.8	3930	1185	DTO2	BGC0000959	DTO2_FUN_005137	215806_1	4407630	4411187	scaffold_3	+	1	9	present	putative	verified	1	antiSMASH
BGC0000959|c1|9129-21064|+|ANIA_08412|hybrid_PKS-NRPS_(Eurofung)|CBF80487.1	DTO2_FUN_005140-T1	83.2	398	66	1	3533	3929	1	398	6.55e-210	643	10.1	3930	399	DTO2	BGC0000959	DTO2_FUN_005140	215804_1	4418377	4419576	scaffold_3	+	1	9	present	putative	verified	1	antiSMASH
BGC0000959|c1|9129-21064|+|ANIA_08412|hybrid_PKS-NRPS_(Eurofung)|CBF80487.1	DTO2_FUN_005138-T1	82.8	87	15	0	1206	1292	1	87	3.77e-41	146	2.2	3930	96	DTO2	BGC0000959	DTO2_FUN_005138	227706_2	4411235	4411525	scaffold_3	+	1	9	present	putative	verified	1	antiSMASH
BGC0000959|c1|21348-23552|-|ANIA_08413|Exporter_(Eurofung)|CBF80489.1	DTO2_FUN_005142-T1	94.6	410	22	0	1	410	1	410	9.5e-277	754	84.2	487	419	DTO2	BGC0000959	DTO2_FUN_005142	215802_1	4421204	4423223	scaffold_3	-	1	9	present	putative	verified	1	antiSMASH
BGC0000959|c1|24378-26666|+|ANIA_08414|Putative_Zn(II)2Cys6_transcription_factor_(Eurofung)|CBF80491.1	DTO2_FUN_005144-T1	81	531	68	3	1	498	1	531	1.18e-306	848	68.2	730	597	DTO2	BGC0000959	DTO2_FUN_005144	215800_1	4427653	4429446	scaffold_3	-	1	9	present	putative	verified	1	antiSMASH
BGC0000959|c1|1-1964|-|ANIA_08408|Cytochrome_P450_monooxygenase_(Eurofung)|CBF80479.1	DTO3_FUN_001867-T1	85	360	49	1	133	492	1	355	6.28e-217	601	72.3	498	361	DTO3	BGC0000959	DTO3_FUN_001867	215811_1	257271	258568	scaffold_2	+	1	9	present	putative	verified	1	antiSMASH
BGC0000959|c1|1-1964|-|ANIA_08408|Cytochrome_P450_monooxygenase_(Eurofung)|CBF80479.1	DTO3_FUN_001866-T1	85.2	115	16	1	1	114	1	115	8.34e-60	191	22.9	498	124	DTO3	BGC0000959	DTO3_FUN_001866	215812_1	256632	257079	scaffold_2	+	1	9	present	putative	verified	1	antiSMASH
BGC0000959|c1|2331-3491|+|ANIA_08409|enoylreductase|CBF80481.1	DTO3_FUN_001865-T1	80.8	354	47	1	1	333	1	354	1.11e-210	578	100	333	354	DTO3	BGC0000959	DTO3_FUN_001865	215810_1	255136	256271	scaffold_2	-	1	9	present	putative	verified	1	antiSMASH
BGC0000959|c1|3694-5858|+|ANIA_08410|FAD-dependent_monooxygenase_(Eurofung)|CBF80483.1	DTO3_FUN_001864-T1	84.4	578	74	1	36	613	1	562	0	1001	92.6	624	564	DTO3	BGC0000959	DTO3_FUN_001864	215809_1	252836	254741	scaffold_2	-	1	9	present	putative	verified	1	antiSMASH
BGC0000959|c1|6974-8653|-|ANIA_08411|PKS-NRPS_hybrid|CBF80485.1	DTO3_FUN_001863-T1	81.5	519	73	1	1	519	2	497	2.91997737348635e-319	867	100	519	497	DTO3	BGC0000959	DTO3_FUN_001863	215807_1	250534	252219	scaffold_2	+	1	9	present	putative	verified	1	antiSMASH
BGC0000959|c1|9129-21064|+|ANIA_08412|hybrid_PKS-NRPS_(Eurofung)|CBF80487.1	DTO3_FUN_001862-T1	83.3	3580	516	8	1	3527	1	3552	0	5845	89.7	3930	3552	DTO3	BGC0000959	DTO3_FUN_001862	228060_1	239413	250120	scaffold_2	-	1	9	present	putative	verified	1	antiSMASH
BGC0000959|c1|9129-21064|+|ANIA_08412|hybrid_PKS-NRPS_(Eurofung)|CBF80487.1	DTO3_FUN_001861-T1	82.6	367	63	1	3564	3929	1	367	1.32e-191	589	9.3	3930	368	DTO3	BGC0000959	DTO3_FUN_001861	215804_1	238201	239307	scaffold_2	-	1	9	present	putative	verified	1	antiSMASH
BGC0000959|c1|21348-23552|-|ANIA_08413|Exporter_(Eurofung)|CBF80489.1	DTO3_FUN_001859-T1	94.1	410	24	0	1	410	1	410	7.84e-276	752	84.2	487	419	DTO3	BGC0000959	DTO3_FUN_001859	215802_1	234564	236559	scaffold_2	+	1	9	present	putative	verified	1	antiSMASH
BGC0000959|c1|24378-26666|+|ANIA_08414|Putative_Zn(II)2Cys6_transcription_factor_(Eurofung)|CBF80491.1	DTO3_FUN_001857-T1	81	531	68	3	1	498	1	531	5.89e-307	848	68.2	730	597	DTO3	BGC0000959	DTO3_FUN_001857	215800_1	228346	230139	scaffold_2	+	1	9	present	putative	verified	1	antiSMASH
BGC0000959|c1|1-1964|-|ANIA_08408|Cytochrome_P450_monooxygenase_(Eurofung)|CBF80479.1	DTO4_FUN_003387-T1	85	360	49	1	133	492	1	355	6.33e-217	601	72.3	498	361	DTO4	BGC0000959	DTO4_FUN_003387	215811_1	4450764	4452061	scaffold_2	-	1	9	present	putative	verified	1	antiSMASH
BGC0000959|c1|1-1964|-|ANIA_08408|Cytochrome_P450_monooxygenase_(Eurofung)|CBF80479.1	DTO4_FUN_003388-T1	85.2	115	16	1	1	114	1	115	8.41e-60	191	22.9	498	124	DTO4	BGC0000959	DTO4_FUN_003388	215812_1	4452253	4452700	scaffold_2	-	1	9	present	putative	verified	1	antiSMASH
BGC0000959|c1|2331-3491|+|ANIA_08409|enoylreductase|CBF80481.1	DTO4_FUN_003389-T1	80.8	354	47	1	1	333	1	354	1.11e-210	578	100	333	354	DTO4	BGC0000959	DTO4_FUN_003389	215810_1	4453061	4454196	scaffold_2	+	1	9	present	putative	verified	1	antiSMASH
BGC0000959|c1|3694-5858|+|ANIA_08410|FAD-dependent_monooxygenase_(Eurofung)|CBF80483.1	DTO4_FUN_003390-T1	84.4	578	74	1	36	613	1	562	0	1001	92.6	624	564	DTO4	BGC0000959	DTO4_FUN_003390	215809_1	4454591	4456401	scaffold_2	+	1	9	present	putative	verified	1	antiSMASH
BGC0000959|c1|6974-8653|-|ANIA_08411|PKS-NRPS_hybrid|CBF80485.1	DTO4_FUN_003391-T1	81.5	519	73	1	1	519	2	497	2.93998703214292e-319	867	100	519	497	DTO4	BGC0000959	DTO4_FUN_003391	215807_1	4457113	4458798	scaffold_2	-	1	9	present	putative	verified	1	antiSMASH
BGC0000959|c1|9129-21064|+|ANIA_08412|hybrid_PKS-NRPS_(Eurofung)|CBF80487.1	DTO4_FUN_003392-T1	83.3	3580	516	8	1	3527	1	3552	0	5845	89.7	3930	3552	DTO4	BGC0000959	DTO4_FUN_003392	228060_1	4459212	4469919	scaffold_2	+	1	9	present	putative	verified	1	antiSMASH
BGC0000959|c1|9129-21064|+|ANIA_08412|hybrid_PKS-NRPS_(Eurofung)|CBF80487.1	DTO4_FUN_003393-T1	82.6	367	63	1	3564	3929	1	367	1.33e-191	589	9.3	3930	368	DTO4	BGC0000959	DTO4_FUN_003393	215804_1	4470025	4471131	scaffold_2	+	1	9	present	putative	verified	1	antiSMASH
BGC0000959|c1|21348-23552|-|ANIA_08413|Exporter_(Eurofung)|CBF80489.1	DTO4_FUN_003395-T1	94.1	410	24	0	1	410	1	410	7.91e-276	752	84.2	487	419	DTO4	BGC0000959	DTO4_FUN_003395	215802_1	4472541	4474768	scaffold_2	-	1	9	present	putative	verified	1	antiSMASH
BGC0000959|c1|24378-26666|+|ANIA_08414|Putative_Zn(II)2Cys6_transcription_factor_(Eurofung)|CBF80491.1	DTO4_FUN_003397-T1	81	531	68	3	1	498	1	531	5.94e-307	848	68.2	730	597	DTO4	BGC0000959	DTO4_FUN_003397	215800_1	4479193	4480986	scaffold_2	-	1	9	present	putative	verified	1	antiSMASH
BGC0000959|c1|1-1964|-|ANIA_08408|Cytochrome_P450_monooxygenase_(Eurofung)|CBF80479.1	DTO5_FUN_001866-T1	82.4	506	70	3	1	492	1	501	5.48e-296	807	98.8	498	507	DTO5	BGC0000959	DTO5_FUN_001866	215811_1	257619	259555	scaffold_2	+	1	9	present	putative	verified	1	antiSMASH
BGC0000959|c1|2331-3491|+|ANIA_08409|enoylreductase|CBF80481.1	DTO5_FUN_001865-T1	80.8	354	47	1	1	333	1	354	1.1e-210	578	100	333	354	DTO5	BGC0000959	DTO5_FUN_001865	215810_1	256123	257258	scaffold_2	-	1	9	present	putative	verified	1	antiSMASH
BGC0000959|c1|3694-5858|+|ANIA_08410|FAD-dependent_monooxygenase_(Eurofung)|CBF80483.1	DTO5_FUN_001864-T1	84.4	578	74	1	36	613	1	562	0	1001	92.6	624	564	DTO5	BGC0000959	DTO5_FUN_001864	215809_1	253918	255728	scaffold_2	-	1	9	present	putative	verified	1	antiSMASH
BGC0000959|c1|6974-8653|-|ANIA_08411|PKS-NRPS_hybrid|CBF80485.1	DTO5_FUN_001863-T1	81.5	519	73	1	1	519	2	497	2.91997737348635e-319	867	100	519	497	DTO5	BGC0000959	DTO5_FUN_001863	215807_1	251521	253206	scaffold_2	+	1	9	present	putative	verified	1	antiSMASH
BGC0000959|c1|9129-21064|+|ANIA_08412|hybrid_PKS-NRPS_(Eurofung)|CBF80487.1	DTO5_FUN_001862-T1	83.3	3580	516	8	1	3527	1	3552	0	5845	89.7	3930	3552	DTO5	BGC0000959	DTO5_FUN_001862	228060_1	240400	251107	scaffold_2	-	1	9	present	putative	verified	1	antiSMASH
BGC0000959|c1|9129-21064|+|ANIA_08412|hybrid_PKS-NRPS_(Eurofung)|CBF80487.1	DTO5_FUN_001861-T1	82.6	367	63	1	3564	3929	1	367	1.32e-191	589	9.3	3930	368	DTO5	BGC0000959	DTO5_FUN_001861	215804_1	239188	240294	scaffold_2	-	1	9	present	putative	verified	1	antiSMASH
BGC0000959|c1|21348-23552|-|ANIA_08413|Exporter_(Eurofung)|CBF80489.1	DTO5_FUN_001859-T1	93.5	310	20	0	101	410	11	320	5.88e-202	561	63.7	487	329	DTO5	BGC0000959	DTO5_FUN_001859	215802_1	235551	237762	scaffold_2	+	1	9	present	putative	verified	1	antiSMASH
BGC0000959|c1|24378-26666|+|ANIA_08414|Putative_Zn(II)2Cys6_transcription_factor_(Eurofung)|CBF80491.1	DTO5_FUN_001857-T1	81	531	68	3	1	498	1	531	5.89e-307	848	68.2	730	597	DTO5	BGC0000959	DTO5_FUN_001857	215800_1	229333	231126	scaffold_2	+	1	9	present	putative	verified	1	antiSMASH
BGC0000959|c1|1-1964|-|ANIA_08408|Cytochrome_P450_monooxygenase_(Eurofung)|CBF80479.1	DTO6_FUN_001892-T1	82.4	506	70	3	1	492	1	501	5.53e-296	807	98.8	498	507	DTO6	BGC0000959	DTO6_FUN_001892	215811_1	264477	266413	scaffold_2	+	1	9	present	putative	verified	1	antiSMASH
BGC0000959|c1|2331-3491|+|ANIA_08409|enoylreductase|CBF80481.1	DTO6_FUN_001891-T1	80.8	354	47	1	1	333	1	354	1.11e-210	578	100	333	354	DTO6	BGC0000959	DTO6_FUN_001891	215810_1	262981	264116	scaffold_2	-	1	9	present	putative	verified	1	antiSMASH
BGC0000959|c1|3694-5858|+|ANIA_08410|FAD-dependent_monooxygenase_(Eurofung)|CBF80483.1	DTO6_FUN_001890-T1	84.4	578	74	1	36	613	1	562	0	1001	92.6	624	564	DTO6	BGC0000959	DTO6_FUN_001890	215809_1	260776	262586	scaffold_2	-	1	9	present	putative	verified	1	antiSMASH
BGC0000959|c1|6974-8653|-|ANIA_08411|PKS-NRPS_hybrid|CBF80485.1	DTO6_FUN_001889-T1	81.5	519	73	1	1	519	2	497	2.93998703214292e-319	867	100	519	497	DTO6	BGC0000959	DTO6_FUN_001889	215807_1	258379	260064	scaffold_2	+	1	9	present	putative	verified	1	antiSMASH
BGC0000959|c1|9129-21064|+|ANIA_08412|hybrid_PKS-NRPS_(Eurofung)|CBF80487.1	DTO6_FUN_001888-T1	83.3	3580	516	8	1	3527	1	3552	0	5845	89.7	3930	3552	DTO6	BGC0000959	DTO6_FUN_001888	228060_1	247258	257965	scaffold_2	-	1	9	present	putative	verified	1	antiSMASH
BGC0000959|c1|9129-21064|+|ANIA_08412|hybrid_PKS-NRPS_(Eurofung)|CBF80487.1	DTO6_FUN_001887-T1	82.6	367	63	1	3564	3929	1	367	1.33e-191	589	9.3	3930	368	DTO6	BGC0000959	DTO6_FUN_001887	215804_1	246046	247152	scaffold_2	-	1	9	present	putative	verified	1	antiSMASH
BGC0000959|c1|21348-23552|-|ANIA_08413|Exporter_(Eurofung)|CBF80489.1	DTO6_FUN_001885-T1	94.1	410	24	0	1	410	1	410	7.91e-276	752	84.2	487	419	DTO6	BGC0000959	DTO6_FUN_001885	215802_1	243033	244393	scaffold_2	+	1	9	present	putative	verified	1	antiSMASH
BGC0000959|c1|24378-26666|+|ANIA_08414|Putative_Zn(II)2Cys6_transcription_factor_(Eurofung)|CBF80491.1	DTO6_FUN_001882-T1	81	531	68	3	1	498	1	531	5.94e-307	848	68.2	730	597	DTO6	BGC0000959	DTO6_FUN_001882	215800_1	236191	237984	scaffold_2	+	1	9	present	putative	verified	1	antiSMASH
BGC0000959|c1|1-1964|-|ANIA_08408|Cytochrome_P450_monooxygenase_(Eurofung)|CBF80479.1	DTO7_FUN_003428-T1	82.2	506	71	3	1	492	1	501	7.46e-294	802	98.8	498	507	DTO7	BGC0000959	DTO7_FUN_003428	215811_1	4400818	4402754	scaffold_2	-	1	9	present	putative	verified	1	antiSMASH
BGC0000959|c1|2331-3491|+|ANIA_08409|enoylreductase|CBF80481.1	DTO7_FUN_003429-T1	80.5	354	48	1	1	333	1	354	9.11e-210	576	100	333	354	DTO7	BGC0000959	DTO7_FUN_003429	215810_1	4403113	4404248	scaffold_2	+	1	9	present	putative	verified	1	antiSMASH
BGC0000959|c1|3694-5858|+|ANIA_08410|FAD-dependent_monooxygenase_(Eurofung)|CBF80483.1	DTO7_FUN_003430-T1	88.2	578	68	0	36	613	1	578	0	1060	92.6	624	580	DTO7	BGC0000959	DTO7_FUN_003430	215809_1	4404643	4406452	scaffold_2	+	1	9	present	putative	verified	1	antiSMASH
BGC0000959|c1|6974-8653|-|ANIA_08411|PKS-NRPS_hybrid|CBF80485.1	DTO7_FUN_003431-T1	93	284	20	0	236	519	1	284	5.2e-202	561	54.7	519	284	DTO7	BGC0000959	DTO7_FUN_003431	215808_1	4406877	4408344	scaffold_2	-	1	9	present	putative	verified	1	antiSMASH
BGC0000959|c1|6974-8653|-|ANIA_08411|PKS-NRPS_hybrid|CBF80485.1	DTO7_FUN_003432-T1	91.6	155	13	0	42	196	12	166	1.23e-106	315	29.9	519	180	DTO7	BGC0000959	DTO7_FUN_003432	215807_1	4408161	4408851	scaffold_2	-	1	9	present	putative	verified	1	antiSMASH
BGC0000959|c1|9129-21064|+|ANIA_08412|hybrid_PKS-NRPS_(Eurofung)|CBF80487.1	DTO7_FUN_003433-T1	83.3	3580	517	8	1	3527	1	3552	0	5846	89.7	3930	3552	DTO7	BGC0000959	DTO7_FUN_003433	228060_1	4409265	4419972	scaffold_2	+	1	9	present	putative	verified	1	antiSMASH
BGC0000959|c1|9129-21064|+|ANIA_08412|hybrid_PKS-NRPS_(Eurofung)|CBF80487.1	DTO7_FUN_003434-T1	84.1	276	43	1	3655	3929	5	280	1.47e-143	447	7	3930	281	DTO7	BGC0000959	DTO7_FUN_003434	215804_1	4420340	4421185	scaffold_2	+	1	9	present	putative	verified	1	antiSMASH
BGC0000959|c1|21348-23552|-|ANIA_08413|Exporter_(Eurofung)|CBF80489.1	DTO7_FUN_003436-T1	94.9	410	21	0	1	410	1	410	5.81e-278	758	84.2	487	419	DTO7	BGC0000959	DTO7_FUN_003436	215802_1	4422742	4425164	scaffold_2	-	1	9	present	putative	verified	1	antiSMASH
BGC0000959|c1|24378-26666|+|ANIA_08414|Putative_Zn(II)2Cys6_transcription_factor_(Eurofung)|CBF80491.1	DTO7_FUN_003438-T1	81	531	68	3	1	498	1	531	2.4e-306	847	68.2	730	597	DTO7	BGC0000959	DTO7_FUN_003438	215800_1	4429245	4431038	scaffold_2	-	1	9	present	putative	verified	1	antiSMASH
BGC0000959|c1|1-1964|-|ANIA_08408|Cytochrome_P450_monooxygenase_(Eurofung)|CBF80479.1	DTO8_FUN_001647-T1	83.9	248	35	1	245	492	1	243	1.27e-140	403	49.8	498	249	DTO8	BGC0000959	DTO8_FUN_001647	215811_1	4544881	4545757	scaffold_1	-	1	9	present	putative	verified	1	antiSMASH
BGC0000959|c1|1-1964|-|ANIA_08408|Cytochrome_P450_monooxygenase_(Eurofung)|CBF80479.1	DTO8_FUN_001648-T1	85.2	115	16	1	1	114	1	115	8.8e-60	191	22.9	498	124	DTO8	BGC0000959	DTO8_FUN_001648	215812_1	4546376	4546823	scaffold_1	-	1	9	present	putative	verified	1	antiSMASH
BGC0000959|c1|2331-3491|+|ANIA_08409|enoylreductase|CBF80481.1	DTO8_FUN_001649-T1	81.1	354	46	1	1	333	1	354	1.42e-211	580	100	333	354	DTO8	BGC0000959	DTO8_FUN_001649	215810_1	4547182	4548317	scaffold_1	+	1	9	present	putative	verified	1	antiSMASH
BGC0000959|c1|3694-5858|+|ANIA_08410|FAD-dependent_monooxygenase_(Eurofung)|CBF80483.1	DTO8_FUN_001650-T1	88.1	578	69	0	36	613	1	578	0	1056	92.6	624	580	DTO8	BGC0000959	DTO8_FUN_001650	215809_1	4548712	4550521	scaffold_1	+	1	9	present	putative	verified	1	antiSMASH
BGC0000959|c1|6974-8653|-|ANIA_08411|PKS-NRPS_hybrid|CBF80485.1	DTO8_FUN_001652-T1	85.1	268	22	1	22	289	92	341	5.93e-170	482	51.6	519	341	DTO8	BGC0000959	DTO8_FUN_001652	229235_1	4551993	4553128	scaffold_1	-	1	9	present	putative	verified	1	antiSMASH
BGC0000959|c1|6974-8653|-|ANIA_08411|PKS-NRPS_hybrid|CBF80485.1	DTO8_FUN_001651-T1	94	149	9	0	371	519	1	149	5.86e-102	301	28.7	519	149	DTO8	BGC0000959	DTO8_FUN_001651	215808_1	4551234	4551752	scaffold_1	-	1	9	present	putative	verified	1	antiSMASH
BGC0000959|c1|9129-21064|+|ANIA_08412|hybrid_PKS-NRPS_(Eurofung)|CBF80487.1	DTO8_FUN_001653-T1	83	2512	347	8	1	2459	1	2484	0	4094	62.6	3930	2484	DTO8	BGC0000959	DTO8_FUN_001653	229236_1	4553331	4560834	scaffold_1	+	1	9	present	putative	verified	1	antiSMASH
BGC0000959|c1|9129-21064|+|ANIA_08412|hybrid_PKS-NRPS_(Eurofung)|CBF80487.1	DTO8_FUN_001654-T1	85.8	1024	143	2	2504	3527	1	1022	0	1724	26.1	3930	1022	DTO8	BGC0000959	DTO8_FUN_001654	229237_1	4560964	4564032	scaffold_1	+	1	9	present	putative	verified	1	antiSMASH
BGC0000959|c1|9129-21064|+|ANIA_08412|hybrid_PKS-NRPS_(Eurofung)|CBF80487.1	DTO8_FUN_001655-T1	83.2	398	66	1	3533	3929	1	398	2.39e-209	642	10.1	3930	399	DTO8	BGC0000959	DTO8_FUN_001655	215804_1	4564045	4565244	scaffold_1	+	1	9	present	putative	verified	1	antiSMASH
BGC0000959|c1|21348-23552|-|ANIA_08413|Exporter_(Eurofung)|CBF80489.1	DTO8_FUN_001657-T1	94.6	410	22	0	1	410	1	410	2.48e-277	756	84.2	487	419	DTO8	BGC0000959	DTO8_FUN_001657	215802_1	4566901	4568261	scaffold_1	-	1	9	present	putative	verified	1	antiSMASH
BGC0000959|c1|1-1964|-|ANIA_08408|Cytochrome_P450_monooxygenase_(Eurofung)|CBF80479.1	DTO9_FUN_005183-T1	81.9	454	63	3	1	440	1	449	1.24e-259	714	88.4	498	477	DTO9	BGC0000959	DTO9_FUN_005183	215814_1	4483172	4485018	scaffold_3	-	1	9	present	putative	verified	1	antiSMASH
BGC0000959|c1|2331-3491|+|ANIA_08409|enoylreductase|CBF80481.1	DTO9_FUN_005184-T1	80.5	354	48	1	1	333	1	354	6.49e-210	576	100	333	354	DTO9	BGC0000959	DTO9_FUN_005184	215810_1	4485379	4486514	scaffold_3	+	1	9	present	putative	verified	1	antiSMASH
BGC0000959|c1|3694-5858|+|ANIA_08410|FAD-dependent_monooxygenase_(Eurofung)|CBF80483.1	DTO9_FUN_005185-T1	84.4	578	74	1	36	613	1	562	0	1001	92.6	624	564	DTO9	BGC0000959	DTO9_FUN_005185	215809_1	4486909	4488719	scaffold_3	+	1	9	present	putative	verified	1	antiSMASH
BGC0000959|c1|6974-8653|-|ANIA_08411|PKS-NRPS_hybrid|CBF80485.1	DTO9_FUN_005186-T1	85.3	463	68	0	1	463	2	464	2.39e-303	825	89.2	519	472	DTO9	BGC0000959	DTO9_FUN_005186	215807_1	4489437	4491116	scaffold_3	-	1	9	present	putative	verified	1	antiSMASH
BGC0000959|c1|9129-21064|+|ANIA_08412|hybrid_PKS-NRPS_(Eurofung)|CBF80487.1	DTO9_FUN_005187-T1	83.3	3580	516	8	1	3527	1	3552	0	5847	89.7	3930	3552	DTO9	BGC0000959	DTO9_FUN_005187	228060_1	4491530	4502237	scaffold_3	+	1	9	present	putative	verified	1	antiSMASH
BGC0000959|c1|9129-21064|+|ANIA_08412|hybrid_PKS-NRPS_(Eurofung)|CBF80487.1	DTO9_FUN_005188-T1	83.2	398	66	1	3533	3929	1	398	6.7e-210	643	10.1	3930	399	DTO9	BGC0000959	DTO9_FUN_005188	215804_1	4502250	4503449	scaffold_3	+	1	9	present	putative	verified	1	antiSMASH
BGC0000959|c1|21348-23552|-|ANIA_08413|Exporter_(Eurofung)|CBF80489.1	DTO9_FUN_005190-T1	93.3	300	16	1	115	410	1	300	2.18e-192	536	60.8	487	309	DTO9	BGC0000959	DTO9_FUN_005190	215802_1	4504965	4507112	scaffold_3	-	1	9	present	putative	verified	1	antiSMASH
BGC0000959|c1|24378-26666|+|ANIA_08414|Putative_Zn(II)2Cys6_transcription_factor_(Eurofung)|CBF80491.1	DTO9_FUN_005192-T1	80.8	531	69	3	1	498	1	531	3.98e-305	844	68.2	730	597	DTO9	BGC0000959	DTO9_FUN_005192	215800_1	4511528	4513321	scaffold_3	-	1	9	present	putative	verified	1	antiSMASH
BGC0000372|c1|1-1288|-|AFUA_3G12890|C6_transcription_factor|EAL92294.1	DTO10_FUN_007569-T1	93.9	411	22	2	1	411	1	408	1.35e-279	758	100	411	408	DTO10	BGC0000372	DTO10_FUN_007569	217337_1	877784	879881	scaffold_6	+	7	8	present	present	verified	7	antiSMASH
BGC0000372|c1|2582-4062|+|AFUA_3G12900|MFS_transporter,_putative|EAL92293.2	DTO10_FUN_007568-T1	96.2	449	17	0	1	449	1	449	0	873	100	449	449	DTO10	BGC0000372	DTO10_FUN_007568	217338_1	875700	877554	scaffold_6	-	7	8	present	present	verified	7	antiSMASH
BGC0000372|c1|4632-5993|-|AFUA_3G12910|O-methyltransferase|EAL92292.1	DTO10_FUN_007567-T1	96.8	433	14	0	1	433	1	433	2.23000000061609e-315	850	100	433	433	DTO10	BGC0000372	DTO10_FUN_007567	217339_1	873693	875470	scaffold_6	+	7	8	present	present	verified	7	antiSMASH
BGC0000372|c1|6329-13058|+|AFUA_3G12920|nonribosomal_peptide_synthtease|EAL92291.2	DTO10_FUN_007566-T1	93.6	2202	140	0	1	2202	1	2202	0	4068	100	2202	2202	DTO10	BGC0000372	DTO10_FUN_007566	217340_1	866814	873538	scaffold_6	-	7	8	present	present	verified	7	antiSMASH
BGC0000372|c1|13752-15223|+|AFUA_3G12930|dimethylallyl_tryptophan_synthase|EAL92290.2	DTO10_FUN_007565-T1	95.3	472	22	0	1	472	1	472	0	929	100	472	472	DTO10	BGC0000372	DTO10_FUN_007565	217341_1	864661	866132	scaffold_6	-	7	8	present	present	verified	7	antiSMASH
BGC0000372|c1|15446-17952|-|AFUA_3G12940|C6_transcription_factor|EAL92289.2	DTO10_FUN_007564-T1	96	754	29	1	1	754	1	753	0	1438	100	754	753	DTO10	BGC0000372	DTO10_FUN_007564	217342_1	861951	864451	scaffold_6	+	7	8	present	present	verified	7	antiSMASH
BGC0000372|c1|18429-19995|-|AFUA_3G12950|FAD_binding_domain_protein|EAL92288.1	DTO10_FUN_007563-T1	95.5	468	21	0	1	468	15	482	0	912	100	468	482	DTO10	BGC0000372	DTO10_FUN_007563	217343_1	859871	861479	scaffold_6	+	7	8	present	present	verified	7	antiSMASH
BGC0000372|c1|20339-22264|-|AFUA_3G12960|cytochrome_P450_monooxigenase|EAL92287.1	DTO10_FUN_007562-T1	92.3	532	30	1	19	550	1	521	0	991	96.7	550	521	DTO10	BGC0000372	DTO10_FUN_007562	217344_1	857705	859572	scaffold_6	+	7	8	present	present	verified	7	antiSMASH
BGC0000372|c1|1-1288|-|AFUA_3G12890|C6_transcription_factor|EAL92294.1	DTO11_FUN_001456-T1	93.7	411	23	2	1	411	1	408	3.76e-279	757	100	411	408	DTO11	BGC0000372	DTO11_FUN_001456	217337_1	3984468	3986575	scaffold_1	-	7	8	present	present	verified	7	antiSMASH
BGC0000372|c1|2582-4062|+|AFUA_3G12900|MFS_transporter,_putative|EAL92293.2	DTO11_FUN_001457-T1	96.2	449	17	0	1	449	1	449	0	873	100	449	449	DTO11	BGC0000372	DTO11_FUN_001457	217338_1	3986818	3988700	scaffold_1	+	7	8	present	present	verified	7	antiSMASH
BGC0000372|c1|4632-5993|-|AFUA_3G12910|O-methyltransferase|EAL92292.1	DTO11_FUN_001458-T1	96.5	433	15	0	1	433	1	433	6.22000000211721e-315	849	100	433	433	DTO11	BGC0000372	DTO11_FUN_001458	217339_1	3989047	3990601	scaffold_1	-	7	8	present	present	verified	7	antiSMASH
BGC0000372|c1|6329-13058|+|AFUA_3G12920|nonribosomal_peptide_synthtease|EAL92291.2	DTO11_FUN_001459-T1	93.7	2202	139	0	1	2202	1	2202	0	4070	100	2202	2202	DTO11	BGC0000372	DTO11_FUN_001459	217340_1	3990862	3997635	scaffold_1	+	7	8	present	present	verified	7	antiSMASH
BGC0000372|c1|13752-15223|+|AFUA_3G12930|dimethylallyl_tryptophan_synthase|EAL92290.2	DTO11_FUN_001460-T1	95.3	472	22	0	1	472	1	472	0	929	100	472	472	DTO11	BGC0000372	DTO11_FUN_001460	217341_1	3998268	3999739	scaffold_1	+	7	8	present	present	verified	7	antiSMASH
BGC0000372|c1|15446-17952|-|AFUA_3G12940|C6_transcription_factor|EAL92289.2	DTO11_FUN_001461-T1	96	754	29	1	1	754	1	753	0	1438	100	754	753	DTO11	BGC0000372	DTO11_FUN_001461	217342_1	3997670	4002704	scaffold_1	-	7	8	present	present	verified	7	antiSMASH
BGC0000372|c1|18429-19995|-|AFUA_3G12950|FAD_binding_domain_protein|EAL92288.1	DTO11_FUN_001462-T1	95.5	468	21	0	1	468	1	468	0	912	100	468	468	DTO11	BGC0000372	DTO11_FUN_001462	217343_1	4002922	4004488	scaffold_1	-	7	8	present	present	verified	7	antiSMASH
BGC0000372|c1|20339-22264|-|AFUA_3G12960|cytochrome_P450_monooxigenase|EAL92287.1	DTO11_FUN_001463-T1	92.3	532	30	1	19	550	1	521	0	991	96.7	550	521	DTO11	BGC0000372	DTO11_FUN_001463	217344_1	4004830	4006697	scaffold_1	-	7	8	present	present	verified	7	antiSMASH
BGC0000372|c1|1-1288|-|AFUA_3G12890|C6_transcription_factor|EAL92294.1	DTO12_FUN_005310-T1	93.7	411	23	2	1	411	1	408	3.98e-279	757	100	411	408	DTO12	BGC0000372	DTO12_FUN_005310	217337_1	789149	790426	scaffold_5	+	7	8	present	present	verified	7	antiSMASH
BGC0000372|c1|2582-4062|+|AFUA_3G12900|MFS_transporter,_putative|EAL92293.2	DTO12_FUN_005309-T1	96.2	449	17	0	1	449	1	449	0	873	100	449	449	DTO12	BGC0000372	DTO12_FUN_005309	217338_1	786353	788206	scaffold_5	-	7	8	present	present	verified	7	antiSMASH
BGC0000372|c1|4632-5993|-|AFUA_3G12910|O-methyltransferase|EAL92292.1	DTO12_FUN_005308-T1	96.5	433	15	0	1	433	1	433	6.58000000117536e-315	849	100	433	433	DTO12	BGC0000372	DTO12_FUN_005308	217339_1	784446	786072	scaffold_5	+	7	8	present	present	verified	7	antiSMASH
BGC0000372|c1|6329-13058|+|AFUA_3G12920|nonribosomal_peptide_synthtease|EAL92291.2	DTO12_FUN_005307-T1	93.7	2202	138	0	1	2202	1	2202	0	4072	100	2202	2202	DTO12	BGC0000372	DTO12_FUN_005307	217340_1	777465	784189	scaffold_5	-	7	8	present	present	verified	7	antiSMASH
BGC0000372|c1|13752-15223|+|AFUA_3G12930|dimethylallyl_tryptophan_synthase|EAL92290.2	DTO12_FUN_005306-T1	95.3	472	22	0	1	472	1	472	0	929	100	472	472	DTO12	BGC0000372	DTO12_FUN_005306	217341_1	775312	776783	scaffold_5	-	7	8	present	present	verified	7	antiSMASH
BGC0000372|c1|15446-17952|-|AFUA_3G12940|C6_transcription_factor|EAL92289.2	DTO12_FUN_005305-T1	96	754	29	1	1	754	1	753	0	1438	100	754	753	DTO12	BGC0000372	DTO12_FUN_005305	217342_1	772602	775102	scaffold_5	+	7	8	present	present	verified	7	antiSMASH
BGC0000372|c1|18429-19995|-|AFUA_3G12950|FAD_binding_domain_protein|EAL92288.1	DTO12_FUN_005304-T1	95.5	468	21	0	1	468	1	468	0	912	100	468	468	DTO12	BGC0000372	DTO12_FUN_005304	217343_1	770563	772129	scaffold_5	+	7	8	present	present	verified	7	antiSMASH
BGC0000372|c1|20339-22264|-|AFUA_3G12960|cytochrome_P450_monooxigenase|EAL92287.1	DTO12_FUN_005303-T1	92.3	532	30	1	19	550	1	521	0	991	96.7	550	521	DTO12	BGC0000372	DTO12_FUN_005303	217344_1	768354	770221	scaffold_5	+	7	8	present	present	verified	7	antiSMASH
BGC0000372|c1|1-1288|-|AFUA_3G12890|C6_transcription_factor|EAL92294.1	DTO13_FUN_003211-T1	93.9	411	22	2	1	411	1	408	1.32e-279	758	100	411	408	DTO13	BGC0000372	DTO13_FUN_003211	217337_1	3942343	3944346	scaffold_2	-	7	8	present	present	verified	7	antiSMASH
BGC0000372|c1|2582-4062|+|AFUA_3G12900|MFS_transporter,_putative|EAL92293.2	DTO13_FUN_003212-T1	96.2	449	17	0	1	449	1	449	0	873	100	449	449	DTO13	BGC0000372	DTO13_FUN_003212	217338_1	3944875	3946361	scaffold_2	+	7	8	present	present	verified	7	antiSMASH
BGC0000372|c1|4632-5993|-|AFUA_3G12910|O-methyltransferase|EAL92292.1	DTO13_FUN_003213-T1	96.5	433	15	0	1	433	1	433	6.26999999882987e-315	849	100	433	433	DTO13	BGC0000372	DTO13_FUN_003213	217339_1	3946697	3948403	scaffold_2	-	7	8	present	present	verified	7	antiSMASH
BGC0000372|c1|6329-13058|+|AFUA_3G12920|nonribosomal_peptide_synthtease|EAL92291.2	DTO13_FUN_003214-T1	93.7	2202	138	0	1	2202	1	2202	0	4072	100	2202	2202	DTO13	BGC0000372	DTO13_FUN_003214	217340_1	3948519	3955361	scaffold_2	+	7	8	present	present	verified	7	antiSMASH
BGC0000372|c1|13752-15223|+|AFUA_3G12930|dimethylallyl_tryptophan_synthase|EAL92290.2	DTO13_FUN_003215-T1	95.3	472	22	0	1	472	1	472	0	929	100	472	472	DTO13	BGC0000372	DTO13_FUN_003215	217341_1	3955484	3957546	scaffold_2	+	7	8	present	present	verified	7	antiSMASH
BGC0000372|c1|15446-17952|-|AFUA_3G12940|C6_transcription_factor|EAL92289.2	DTO13_FUN_003216-T1	96	754	29	1	1	754	1	753	0	1438	100	754	753	DTO13	BGC0000372	DTO13_FUN_003216	217342_1	3957712	3960212	scaffold_2	-	7	8	present	present	verified	7	antiSMASH
BGC0000372|c1|18429-19995|-|AFUA_3G12950|FAD_binding_domain_protein|EAL92288.1	DTO13_FUN_003217-T1	95.5	468	21	0	1	468	1	468	0	912	100	468	468	DTO13	BGC0000372	DTO13_FUN_003217	217343_1	3960685	3962251	scaffold_2	-	7	8	present	present	verified	7	antiSMASH
BGC0000372|c1|20339-22264|-|AFUA_3G12960|cytochrome_P450_monooxigenase|EAL92287.1	DTO13_FUN_003218-T1	92.3	532	30	1	19	550	1	521	0	991	96.7	550	521	DTO13	BGC0000372	DTO13_FUN_003218	217344_1	3962593	3964460	scaffold_2	-	7	8	present	present	verified	7	antiSMASH
BGC0000372|c1|1-1288|-|AFUA_3G12890|C6_transcription_factor|EAL92294.1	DTO14_FUN_003837-T1	93.9	411	22	2	1	411	1	408	1.38e-279	758	100	411	408	DTO14	BGC0000372	DTO14_FUN_003837	217337_1	817582	818859	scaffold_3	+	7	8	present	present	verified	7	antiSMASH
BGC0000372|c1|2582-4062|+|AFUA_3G12900|MFS_transporter,_putative|EAL92293.2	DTO14_FUN_003836-T1	96.2	449	17	0	1	449	1	449	0	873	100	449	449	DTO14	BGC0000372	DTO14_FUN_003836	217338_1	814785	816650	scaffold_3	-	7	8	present	present	verified	7	antiSMASH
BGC0000372|c1|4632-5993|-|AFUA_3G12910|O-methyltransferase|EAL92292.1	DTO14_FUN_003835-T1	96.5	433	15	0	1	433	1	433	6.52999999952205e-315	849	100	433	433	DTO14	BGC0000372	DTO14_FUN_003835	217339_1	812878	814564	scaffold_3	+	7	8	present	present	verified	7	antiSMASH
BGC0000372|c1|6329-13058|+|AFUA_3G12920|nonribosomal_peptide_synthtease|EAL92291.2	DTO14_FUN_003834-T1	93.7	2202	138	0	1	2202	1	2202	0	4072	100	2202	2202	DTO14	BGC0000372	DTO14_FUN_003834	217340_1	805898	812622	scaffold_3	-	7	8	present	present	verified	7	antiSMASH
BGC0000372|c1|13752-15223|+|AFUA_3G12930|dimethylallyl_tryptophan_synthase|EAL92290.2	DTO14_FUN_003833-T1	95.3	472	22	0	1	472	1	472	0	929	100	472	472	DTO14	BGC0000372	DTO14_FUN_003833	217341_1	803636	805216	scaffold_3	-	7	8	present	present	verified	7	antiSMASH
BGC0000372|c1|15446-17952|-|AFUA_3G12940|C6_transcription_factor|EAL92289.2	DTO14_FUN_003832-T1	96	754	29	1	1	754	1	753	0	1438	100	754	753	DTO14	BGC0000372	DTO14_FUN_003832	217342_1	801035	803535	scaffold_3	+	7	8	present	present	verified	7	antiSMASH
BGC0000372|c1|18429-19995|-|AFUA_3G12950|FAD_binding_domain_protein|EAL92288.1	DTO14_FUN_003831-T1	95.5	468	21	0	1	468	1	468	0	912	100	468	468	DTO14	BGC0000372	DTO14_FUN_003831	217343_1	798996	800562	scaffold_3	+	7	8	present	present	verified	7	antiSMASH
BGC0000372|c1|20339-22264|-|AFUA_3G12960|cytochrome_P450_monooxigenase|EAL92287.1	DTO14_FUN_003830-T1	92.4	550	31	1	1	550	1	539	0	1026	100	550	539	DTO14	BGC0000372	DTO14_FUN_003830	217344_1	796733	798654	scaffold_3	+	7	8	present	present	verified	7	antiSMASH
BGC0000372|c1|1-1288|-|AFUA_3G12890|C6_transcription_factor|EAL92294.1	DTO15_FUN_003878-T1	93.9	411	22	2	1	411	1	408	1.37e-279	758	100	411	408	DTO15	BGC0000372	DTO15_FUN_003878	217337_1	804998	806275	scaffold_3	+	7	8	present	present	verified	7	antiSMASH
BGC0000372|c1|2582-4062|+|AFUA_3G12900|MFS_transporter,_putative|EAL92293.2	DTO15_FUN_003877-T1	96.2	449	17	0	1	449	1	449	0	873	100	449	449	DTO15	BGC0000372	DTO15_FUN_003877	217338_1	802302	803788	scaffold_3	-	7	8	present	present	verified	7	antiSMASH
BGC0000372|c1|4632-5993|-|AFUA_3G12910|O-methyltransferase|EAL92292.1	DTO15_FUN_003876-T1	96.5	433	15	0	1	433	1	433	6.49999999754193e-315	849	100	433	433	DTO15	BGC0000372	DTO15_FUN_003876	217339_1	800293	801952	scaffold_3	+	7	8	present	present	verified	7	antiSMASH
BGC0000372|c1|6329-13058|+|AFUA_3G12920|nonribosomal_peptide_synthtease|EAL92291.2	DTO15_FUN_003875-T1	93.7	2202	138	0	1	2202	1	2202	0	4072	100	2202	2202	DTO15	BGC0000372	DTO15_FUN_003875	217340_1	793314	800038	scaffold_3	-	7	8	present	present	verified	7	antiSMASH
BGC0000372|c1|13752-15223|+|AFUA_3G12930|dimethylallyl_tryptophan_synthase|EAL92290.2	DTO15_FUN_003874-T1	95.3	472	22	0	1	472	1	472	0	929	100	472	472	DTO15	BGC0000372	DTO15_FUN_003874	217341_1	791161	792632	scaffold_3	-	7	8	present	present	verified	7	antiSMASH
BGC0000372|c1|15446-17952|-|AFUA_3G12940|C6_transcription_factor|EAL92289.2	DTO15_FUN_003873-T1	96	754	29	1	1	754	1	753	0	1438	100	754	753	DTO15	BGC0000372	DTO15_FUN_003873	217342_1	788451	790951	scaffold_3	+	7	8	present	present	verified	7	antiSMASH
BGC0000372|c1|18429-19995|-|AFUA_3G12950|FAD_binding_domain_protein|EAL92288.1	DTO15_FUN_003872-T1	95.5	468	21	0	1	468	1	468	0	912	100	468	468	DTO15	BGC0000372	DTO15_FUN_003872	217343_1	786412	787978	scaffold_3	+	7	8	present	present	verified	7	antiSMASH
BGC0000372|c1|20339-22264|-|AFUA_3G12960|cytochrome_P450_monooxigenase|EAL92287.1	DTO15_FUN_003871-T1	92.3	532	30	1	19	550	1	521	0	991	96.7	550	521	DTO15	BGC0000372	DTO15_FUN_003871	217344_1	784203	786070	scaffold_3	+	7	8	present	present	verified	7	antiSMASH
BGC0000372|c1|1-1288|-|AFUA_3G12890|C6_transcription_factor|EAL92294.1	DTO16_FUN_006651-T1	93.9	411	22	2	1	411	1	408	1.32e-279	758	100	411	408	DTO16	BGC0000372	DTO16_FUN_006651	217337_1	763426	765604	scaffold_5	+	7	8	present	present	verified	7	antiSMASH
BGC0000372|c1|2582-4062|+|AFUA_3G12900|MFS_transporter,_putative|EAL92293.2	DTO16_FUN_006650-T1	96.2	449	17	0	1	449	1	449	0	873	100	449	449	DTO16	BGC0000372	DTO16_FUN_006650	217338_1	761369	763235	scaffold_5	-	7	8	present	present	verified	7	antiSMASH
BGC0000372|c1|4632-5993|-|AFUA_3G12910|O-methyltransferase|EAL92292.1	DTO16_FUN_006649-T1	96.5	433	15	0	1	433	1	433	6.26999999882987e-315	849	100	433	433	DTO16	BGC0000372	DTO16_FUN_006649	217339_1	759466	761136	scaffold_5	+	7	8	present	present	verified	7	antiSMASH
BGC0000372|c1|6329-13058|+|AFUA_3G12920|nonribosomal_peptide_synthtease|EAL92291.2	DTO16_FUN_006648-T1	93.7	2202	139	0	1	2202	1	2202	0	4070	100	2202	2202	DTO16	BGC0000372	DTO16_FUN_006648	217340_1	752483	759207	scaffold_5	-	7	8	present	present	verified	7	antiSMASH
BGC0000372|c1|13752-15223|+|AFUA_3G12930|dimethylallyl_tryptophan_synthase|EAL92290.2	DTO16_FUN_006647-T1	95.3	472	22	0	1	472	1	472	0	929	100	472	472	DTO16	BGC0000372	DTO16_FUN_006647	217341_1	750330	751801	scaffold_5	-	7	8	present	present	verified	7	antiSMASH
BGC0000372|c1|15446-17952|-|AFUA_3G12940|C6_transcription_factor|EAL92289.2	DTO16_FUN_006646-T1	96	754	29	1	1	754	1	753	0	1438	100	754	753	DTO16	BGC0000372	DTO16_FUN_006646	217342_1	747364	750193	scaffold_5	+	7	8	present	present	verified	7	antiSMASH
BGC0000372|c1|18429-19995|-|AFUA_3G12950|FAD_binding_domain_protein|EAL92288.1	DTO16_FUN_006645-T1	95.5	468	21	0	1	468	1	468	0	912	100	468	468	DTO16	BGC0000372	DTO16_FUN_006645	217343_1	745581	747147	scaffold_5	+	7	8	present	present	verified	7	antiSMASH
BGC0000372|c1|20339-22264|-|AFUA_3G12960|cytochrome_P450_monooxigenase|EAL92287.1	DTO16_FUN_006644-T1	92.3	532	30	1	19	550	1	521	0	991	96.7	550	521	DTO16	BGC0000372	DTO16_FUN_006644	217344_1	743372	745239	scaffold_5	+	7	8	present	present	verified	7	antiSMASH
BGC0000372|c1|1-1288|-|AFUA_3G12890|C6_transcription_factor|EAL92294.1	DTO1_FUN_001487-T1	93.9	411	22	2	1	411	1	408	1.37e-279	758	100	411	408	DTO1	BGC0000372	DTO1_FUN_001487	217337_1	4035802	4037079	scaffold_1	-	7	8	present	present	verified	7	antiSMASH
BGC0000372|c1|2582-4062|+|AFUA_3G12900|MFS_transporter,_putative|EAL92293.2	DTO1_FUN_001488-T1	96.2	449	17	0	1	449	1	449	0	873	100	449	449	DTO1	BGC0000372	DTO1_FUN_001488	217338_1	4038020	4039877	scaffold_1	+	7	8	present	present	verified	7	antiSMASH
BGC0000372|c1|4632-5993|-|AFUA_3G12910|O-methyltransferase|EAL92292.1	DTO1_FUN_001489-T1	96.5	433	15	0	1	433	1	433	6.50999999984885e-315	849	100	433	433	DTO1	BGC0000372	DTO1_FUN_001489	217339_1	4040097	4041793	scaffold_1	-	7	8	present	present	verified	7	antiSMASH
BGC0000372|c1|6329-13058|+|AFUA_3G12920|nonribosomal_peptide_synthtease|EAL92291.2	DTO1_FUN_001490-T1	93.7	2202	139	0	1	2202	1	2202	0	4070	100	2202	2202	DTO1	BGC0000372	DTO1_FUN_001490	217340_1	4042039	4048763	scaffold_1	+	7	8	present	present	verified	7	antiSMASH
BGC0000372|c1|13752-15223|+|AFUA_3G12930|dimethylallyl_tryptophan_synthase|EAL92290.2	DTO1_FUN_001491-T1	95.3	472	22	0	1	472	1	472	0	929	100	472	472	DTO1	BGC0000372	DTO1_FUN_001491	217341_1	4049445	4050916	scaffold_1	+	7	8	present	present	verified	7	antiSMASH
BGC0000372|c1|15446-17952|-|AFUA_3G12940|C6_transcription_factor|EAL92289.2	DTO1_FUN_001492-T1	96	754	29	1	1	754	1	753	0	1438	100	754	753	DTO1	BGC0000372	DTO1_FUN_001492	217342_1	4051126	4053626	scaffold_1	-	7	8	present	present	verified	7	antiSMASH
BGC0000372|c1|18429-19995|-|AFUA_3G12950|FAD_binding_domain_protein|EAL92288.1	DTO1_FUN_001493-T1	95.5	468	21	0	1	468	1	468	0	912	100	468	468	DTO1	BGC0000372	DTO1_FUN_001493	217343_1	4054099	4055665	scaffold_1	-	7	8	present	present	verified	7	antiSMASH
BGC0000372|c1|20339-22264|-|AFUA_3G12960|cytochrome_P450_monooxigenase|EAL92287.1	DTO1_FUN_001494-T1	92.3	532	30	1	19	550	1	521	0	991	96.7	550	521	DTO1	BGC0000372	DTO1_FUN_001494	217344_1	4056007	4057874	scaffold_1	-	7	8	present	present	verified	7	antiSMASH
BGC0000372|c1|1-1288|-|AFUA_3G12890|C6_transcription_factor|EAL92294.1	DTO2_FUN_003824-T1	93.9	411	22	2	1	411	1	408	1.32e-279	758	100	411	408	DTO2	BGC0000372	DTO2_FUN_003824	217337_1	802070	804105	scaffold_3	+	7	8	present	present	verified	7	antiSMASH
BGC0000372|c1|2582-4062|+|AFUA_3G12900|MFS_transporter,_putative|EAL92293.2	DTO2_FUN_003823-T1	96.2	449	17	0	1	449	1	449	0	873	100	449	449	DTO2	BGC0000372	DTO2_FUN_003823	217338_1	799984	801863	scaffold_3	-	7	8	present	present	verified	7	antiSMASH
BGC0000372|c1|4632-5993|-|AFUA_3G12910|O-methyltransferase|EAL92292.1	DTO2_FUN_003822-T1	96.8	433	14	0	1	433	1	433	2.17999999896277e-315	850	100	433	433	DTO2	BGC0000372	DTO2_FUN_003822	217339_1	798078	799687	scaffold_3	+	7	8	present	present	verified	7	antiSMASH
BGC0000372|c1|6329-13058|+|AFUA_3G12920|nonribosomal_peptide_synthtease|EAL92291.2	DTO2_FUN_003821-T1	93.6	2202	140	0	1	2202	1	2202	0	4069	100	2202	2202	DTO2	BGC0000372	DTO2_FUN_003821	217340_1	791098	797855	scaffold_3	-	7	8	present	present	verified	7	antiSMASH
BGC0000372|c1|13752-15223|+|AFUA_3G12930|dimethylallyl_tryptophan_synthase|EAL92290.2	DTO2_FUN_003820-T1	95.3	472	22	0	1	472	1	472	0	929	100	472	472	DTO2	BGC0000372	DTO2_FUN_003820	217341_1	788811	790942	scaffold_3	-	7	8	present	present	verified	7	antiSMASH
BGC0000372|c1|15446-17952|-|AFUA_3G12940|C6_transcription_factor|EAL92289.2	DTO2_FUN_003819-T1	96	754	29	1	1	754	1	753	0	1438	100	754	753	DTO2	BGC0000372	DTO2_FUN_003819	217342_1	785994	790942	scaffold_3	+	7	8	present	present	verified	7	antiSMASH
BGC0000372|c1|18429-19995|-|AFUA_3G12950|FAD_binding_domain_protein|EAL92288.1	DTO2_FUN_003818-T1	95.5	468	21	0	1	468	15	482	0	912	100	468	482	DTO2	BGC0000372	DTO2_FUN_003818	217343_1	784154	785762	scaffold_3	+	7	8	present	present	verified	7	antiSMASH
BGC0000372|c1|20339-22264|-|AFUA_3G12960|cytochrome_P450_monooxigenase|EAL92287.1	DTO2_FUN_003817-T1	92.3	532	30	1	19	550	1	521	0	991	96.7	550	521	DTO2	BGC0000372	DTO2_FUN_003817	217344_1	781988	783855	scaffold_3	+	7	8	present	present	verified	7	antiSMASH
BGC0000372|c1|1-1288|-|AFUA_3G12890|C6_transcription_factor|EAL92294.1	DTO3_FUN_003190-T1	93.7	411	23	2	1	411	1	408	3.8e-279	757	100	411	408	DTO3	BGC0000372	DTO3_FUN_003190	217337_1	3921142	3923229	scaffold_2	-	7	8	present	present	verified	7	antiSMASH
BGC0000372|c1|2582-4062|+|AFUA_3G12900|MFS_transporter,_putative|EAL92293.2	DTO3_FUN_003191-T1	96.2	449	17	0	1	449	1	449	0	873	100	449	449	DTO3	BGC0000372	DTO3_FUN_003191	217338_1	3923422	3925277	scaffold_2	+	7	8	present	present	verified	7	antiSMASH
BGC0000372|c1|4632-5993|-|AFUA_3G12910|O-methyltransferase|EAL92292.1	DTO3_FUN_003192-T1	96.5	433	15	0	1	433	1	433	6.28000000113679e-315	849	100	433	433	DTO3	BGC0000372	DTO3_FUN_003192	217339_1	3925523	3927190	scaffold_2	-	7	8	present	present	verified	7	antiSMASH
BGC0000372|c1|6329-13058|+|AFUA_3G12920|nonribosomal_peptide_synthtease|EAL92291.2	DTO3_FUN_003193-T1	93.7	2202	138	0	1	2202	1	2202	0	4072	100	2202	2202	DTO3	BGC0000372	DTO3_FUN_003193	217340_1	3927409	3934165	scaffold_2	+	7	8	present	present	verified	7	antiSMASH
BGC0000372|c1|13752-15223|+|AFUA_3G12930|dimethylallyl_tryptophan_synthase|EAL92290.2	DTO3_FUN_003194-T1	95.3	472	22	0	1	472	1	472	0	929	100	472	472	DTO3	BGC0000372	DTO3_FUN_003194	217341_1	3934379	3936316	scaffold_2	+	7	8	present	present	verified	7	antiSMASH
BGC0000372|c1|15446-17952|-|AFUA_3G12940|C6_transcription_factor|EAL92289.2	DTO3_FUN_003195-T1	96	754	29	1	1	754	1	753	0	1438	100	754	753	DTO3	BGC0000372	DTO3_FUN_003195	217342_1	3934660	3939082	scaffold_2	-	7	8	present	present	verified	7	antiSMASH
BGC0000372|c1|18429-19995|-|AFUA_3G12950|FAD_binding_domain_protein|EAL92288.1	DTO3_FUN_003196-T1	95.5	468	21	0	1	468	1	468	0	912	100	468	468	DTO3	BGC0000372	DTO3_FUN_003196	217343_1	3939499	3941065	scaffold_2	-	7	8	present	present	verified	7	antiSMASH
BGC0000372|c1|20339-22264|-|AFUA_3G12960|cytochrome_P450_monooxigenase|EAL92287.1	DTO3_FUN_003197-T1	92.3	532	30	1	19	550	1	521	0	991	96.7	550	521	DTO3	BGC0000372	DTO3_FUN_003197	217344_1	3941407	3943274	scaffold_2	-	7	8	present	present	verified	7	antiSMASH
BGC0000372|c1|1-1288|-|AFUA_3G12890|C6_transcription_factor|EAL92294.1	DTO4_FUN_002068-T1	93.7	411	23	2	1	411	1	408	3.83e-279	757	100	411	408	DTO4	BGC0000372	DTO4_FUN_002068	217337_1	786213	788174	scaffold_2	+	7	8	present	present	verified	7	antiSMASH
BGC0000372|c1|2582-4062|+|AFUA_3G12900|MFS_transporter,_putative|EAL92293.2	DTO4_FUN_002067-T1	96.2	449	17	0	1	449	1	449	0	873	100	449	449	DTO4	BGC0000372	DTO4_FUN_002067	217338_1	784051	785929	scaffold_2	-	7	8	present	present	verified	7	antiSMASH
BGC0000372|c1|4632-5993|-|AFUA_3G12910|O-methyltransferase|EAL92292.1	DTO4_FUN_002066-T1	96.5	433	15	0	1	433	1	433	6.34000000015638e-315	849	100	433	433	DTO4	BGC0000372	DTO4_FUN_002066	217339_1	782140	783761	scaffold_2	+	7	8	present	present	verified	7	antiSMASH
BGC0000372|c1|6329-13058|+|AFUA_3G12920|nonribosomal_peptide_synthtease|EAL92291.2	DTO4_FUN_002065-T1	93.7	2202	138	0	1	2202	1	2202	0	4072	100	2202	2202	DTO4	BGC0000372	DTO4_FUN_002065	217340_1	775113	781911	scaffold_2	-	7	8	present	present	verified	7	antiSMASH
BGC0000372|c1|13752-15223|+|AFUA_3G12930|dimethylallyl_tryptophan_synthase|EAL92290.2	DTO4_FUN_002064-T1	95.3	472	22	0	1	472	1	472	0	929	100	472	472	DTO4	BGC0000372	DTO4_FUN_002064	217341_1	772865	774901	scaffold_2	-	7	8	present	present	verified	7	antiSMASH
BGC0000372|c1|15446-17952|-|AFUA_3G12940|C6_transcription_factor|EAL92289.2	DTO4_FUN_002063-T1	96	754	29	1	1	754	1	753	0	1438	100	754	753	DTO4	BGC0000372	DTO4_FUN_002063	217342_1	770036	772847	scaffold_2	+	7	8	present	present	verified	7	antiSMASH
BGC0000372|c1|18429-19995|-|AFUA_3G12950|FAD_binding_domain_protein|EAL92288.1	DTO4_FUN_002062-T1	95.5	468	21	0	1	468	1	468	0	912	100	468	468	DTO4	BGC0000372	DTO4_FUN_002062	217343_1	768259	769825	scaffold_2	+	7	8	present	present	verified	7	antiSMASH
BGC0000372|c1|20339-22264|-|AFUA_3G12960|cytochrome_P450_monooxigenase|EAL92287.1	DTO4_FUN_002061-T1	92.3	532	30	1	19	550	1	521	0	991	96.7	550	521	DTO4	BGC0000372	DTO4_FUN_002061	217344_1	766050	767917	scaffold_2	+	7	8	present	present	verified	7	antiSMASH
BGC0000372|c1|1-1288|-|AFUA_3G12890|C6_transcription_factor|EAL92294.1	DTO5_FUN_003194-T1	93.7	411	23	2	1	411	1	408	3.8e-279	757	100	411	408	DTO5	BGC0000372	DTO5_FUN_003194	217337_1	3922143	3924232	scaffold_2	-	7	8	present	present	verified	7	antiSMASH
BGC0000372|c1|2582-4062|+|AFUA_3G12900|MFS_transporter,_putative|EAL92293.2	DTO5_FUN_003195-T1	96.2	449	17	0	1	449	1	449	0	873	100	449	449	DTO5	BGC0000372	DTO5_FUN_003195	217338_1	3924419	3926279	scaffold_2	+	7	8	present	present	verified	7	antiSMASH
BGC0000372|c1|4632-5993|-|AFUA_3G12910|O-methyltransferase|EAL92292.1	DTO5_FUN_003196-T1	96.5	433	15	0	1	433	1	433	6.28000000113679e-315	849	100	433	433	DTO5	BGC0000372	DTO5_FUN_003196	217339_1	3926544	3928188	scaffold_2	-	7	8	present	present	verified	7	antiSMASH
BGC0000372|c1|6329-13058|+|AFUA_3G12920|nonribosomal_peptide_synthtease|EAL92291.2	DTO5_FUN_003197-T1	93.8	2185	135	0	18	2202	1	2185	0	4047	99.2	2202	2185	DTO5	BGC0000372	DTO5_FUN_003197	217340_1	3928492	3935165	scaffold_2	+	7	8	present	present	verified	7	antiSMASH
BGC0000372|c1|13752-15223|+|AFUA_3G12930|dimethylallyl_tryptophan_synthase|EAL92290.2	DTO5_FUN_003198-T1	95.3	472	22	0	1	472	1	472	0	929	100	472	472	DTO5	BGC0000372	DTO5_FUN_003198	217341_1	3935847	3937318	scaffold_2	+	7	8	present	present	verified	7	antiSMASH
BGC0000372|c1|15446-17952|-|AFUA_3G12940|C6_transcription_factor|EAL92289.2	DTO5_FUN_003199-T1	96	754	29	1	1	754	1	753	0	1438	100	754	753	DTO5	BGC0000372	DTO5_FUN_003199	217342_1	3935486	3940084	scaffold_2	-	7	8	present	present	verified	7	antiSMASH
BGC0000372|c1|18429-19995|-|AFUA_3G12950|FAD_binding_domain_protein|EAL92288.1	DTO5_FUN_003200-T1	95.5	468	21	0	1	468	1	468	0	912	100	468	468	DTO5	BGC0000372	DTO5_FUN_003200	217343_1	3940501	3942067	scaffold_2	-	7	8	present	present	verified	7	antiSMASH
BGC0000372|c1|20339-22264|-|AFUA_3G12960|cytochrome_P450_monooxigenase|EAL92287.1	DTO5_FUN_003201-T1	92.3	532	30	1	19	550	1	521	0	991	96.7	550	521	DTO5	BGC0000372	DTO5_FUN_003201	217344_1	3942409	3944276	scaffold_2	-	7	8	present	present	verified	7	antiSMASH
BGC0000372|c1|1-1288|-|AFUA_3G12890|C6_transcription_factor|EAL92294.1	DTO6_FUN_003249-T1	93.7	411	23	2	1	411	1	408	3.83e-279	757	100	411	408	DTO6	BGC0000372	DTO6_FUN_003249	217337_1	3929042	3930319	scaffold_2	-	7	8	present	present	verified	7	antiSMASH
BGC0000372|c1|2582-4062|+|AFUA_3G12900|MFS_transporter,_putative|EAL92293.2	DTO6_FUN_003250-T1	96.2	449	17	0	1	449	1	449	0	873	100	449	449	DTO6	BGC0000372	DTO6_FUN_003250	217338_1	3931461	3933117	scaffold_2	+	7	8	present	present	verified	7	antiSMASH
BGC0000372|c1|4632-5993|-|AFUA_3G12910|O-methyltransferase|EAL92292.1	DTO6_FUN_003251-T1	96.5	433	15	0	1	433	1	433	6.34000000015638e-315	849	100	433	433	DTO6	BGC0000372	DTO6_FUN_003251	217339_1	3933352	3935023	scaffold_2	-	7	8	present	present	verified	7	antiSMASH
BGC0000372|c1|6329-13058|+|AFUA_3G12920|nonribosomal_peptide_synthtease|EAL92291.2	DTO6_FUN_003252-T1	93.8	2185	135	0	18	2202	1	2185	0	4047	99.2	2202	2185	DTO6	BGC0000372	DTO6_FUN_003252	217340_1	3935330	3942003	scaffold_2	+	7	8	present	present	verified	7	antiSMASH
BGC0000372|c1|13752-15223|+|AFUA_3G12930|dimethylallyl_tryptophan_synthase|EAL92290.2	DTO6_FUN_003253-T1	95.3	472	22	0	1	472	1	472	0	929	100	472	472	DTO6	BGC0000372	DTO6_FUN_003253	217341_1	3942685	3944156	scaffold_2	+	7	8	present	present	verified	7	antiSMASH
BGC0000372|c1|15446-17952|-|AFUA_3G12940|C6_transcription_factor|EAL92289.2	DTO6_FUN_003254-T1	96	754	29	1	1	754	1	753	0	1438	100	754	753	DTO6	BGC0000372	DTO6_FUN_003254	217342_1	3944366	3946866	scaffold_2	-	7	8	present	present	verified	7	antiSMASH
BGC0000372|c1|18429-19995|-|AFUA_3G12950|FAD_binding_domain_protein|EAL92288.1	DTO6_FUN_003255-T1	95.5	468	21	0	1	468	1	468	0	912	100	468	468	DTO6	BGC0000372	DTO6_FUN_003255	217343_1	3947339	3948905	scaffold_2	-	7	8	present	present	verified	7	antiSMASH
BGC0000372|c1|20339-22264|-|AFUA_3G12960|cytochrome_P450_monooxigenase|EAL92287.1	DTO6_FUN_003256-T1	92.3	532	30	1	19	550	1	521	0	991	96.7	550	521	DTO6	BGC0000372	DTO6_FUN_003256	217344_1	3949247	3951114	scaffold_2	-	7	8	present	present	verified	7	antiSMASH
BGC0000372|c1|1-1288|-|AFUA_3G12890|C6_transcription_factor|EAL92294.1	DTO7_FUN_002119-T1	93.9	411	22	2	1	411	1	408	1.33e-279	758	100	411	408	DTO7	BGC0000372	DTO7_FUN_002119	217337_1	816765	819095	scaffold_2	+	7	8	present	present	verified	7	antiSMASH
BGC0000372|c1|2582-4062|+|AFUA_3G12900|MFS_transporter,_putative|EAL92293.2	DTO7_FUN_002118-T1	96.2	449	17	0	1	449	1	449	0	873	100	449	449	DTO7	BGC0000372	DTO7_FUN_002118	217338_1	814695	816578	scaffold_2	-	7	8	present	present	verified	7	antiSMASH
BGC0000372|c1|4632-5993|-|AFUA_3G12910|O-methyltransferase|EAL92292.1	DTO7_FUN_002117-T1	98.4	308	5	0	126	433	1	308	3.14e-227	622	71.1	433	308	DTO7	BGC0000372	DTO7_FUN_002117	217339_1	812768	814476	scaffold_2	+	7	8	present	present	verified	7	antiSMASH
BGC0000372|c1|6329-13058|+|AFUA_3G12920|nonribosomal_peptide_synthtease|EAL92291.2	DTO7_FUN_002116-T1	93.6	2202	140	0	1	2202	1	2202	0	4067	100	2202	2202	DTO7	BGC0000372	DTO7_FUN_002116	217340_1	805810	812584	scaffold_2	-	7	8	present	present	verified	7	antiSMASH
BGC0000372|c1|13752-15223|+|AFUA_3G12930|dimethylallyl_tryptophan_synthase|EAL92290.2	DTO7_FUN_002115-T1	95.3	472	22	0	1	472	1	472	0	929	100	472	472	DTO7	BGC0000372	DTO7_FUN_002115	217341_1	803657	805128	scaffold_2	-	7	8	present	present	verified	7	antiSMASH
BGC0000372|c1|15446-17952|-|AFUA_3G12940|C6_transcription_factor|EAL92289.2	DTO7_FUN_002114-T1	96	754	29	1	1	754	1	753	0	1438	100	754	753	DTO7	BGC0000372	DTO7_FUN_002114	217342_1	800687	803774	scaffold_2	+	7	8	present	present	verified	7	antiSMASH
BGC0000372|c1|18429-19995|-|AFUA_3G12950|FAD_binding_domain_protein|EAL92288.1	DTO7_FUN_002113-T1	95.3	468	22	0	1	468	15	482	0	912	100	468	482	DTO7	BGC0000372	DTO7_FUN_002113	217343_1	798866	800474	scaffold_2	+	7	8	present	present	verified	7	antiSMASH
BGC0000372|c1|20339-22264|-|AFUA_3G12960|cytochrome_P450_monooxigenase|EAL92287.1	DTO7_FUN_002112-T1	92.3	532	30	1	19	550	1	521	0	991	96.7	550	521	DTO7	BGC0000372	DTO7_FUN_002112	217344_1	796700	798567	scaffold_2	+	7	8	present	present	verified	7	antiSMASH
BGC0000372|c1|1-1288|-|AFUA_3G12890|C6_transcription_factor|EAL92294.1	DTO8_FUN_000324-T1	93.9	411	22	2	1	411	1	408	1.4e-279	758	100	411	408	DTO8	BGC0000372	DTO8_FUN_000324	217337_1	882472	884739	scaffold_1	+	7	8	present	present	verified	7	antiSMASH
BGC0000372|c1|2582-4062|+|AFUA_3G12900|MFS_transporter,_putative|EAL92293.2	DTO8_FUN_000323-T1	96.2	449	17	0	1	449	1	449	0	873	100	449	449	DTO8	BGC0000372	DTO8_FUN_000323	217338_1	880518	882651	scaffold_1	-	7	8	present	present	verified	7	antiSMASH
BGC0000372|c1|4632-5993|-|AFUA_3G12910|O-methyltransferase|EAL92292.1	DTO8_FUN_000322-T1	96.8	433	14	0	1	433	1	433	2.30999999930886e-315	850	100	433	433	DTO8	BGC0000372	DTO8_FUN_000322	217339_1	878592	880279	scaffold_1	+	7	8	present	present	verified	7	antiSMASH
BGC0000372|c1|6329-13058|+|AFUA_3G12920|nonribosomal_peptide_synthtease|EAL92291.2	DTO8_FUN_000321-T1	93.6	2202	140	0	1	2202	1	2202	0	4068	100	2202	2202	DTO8	BGC0000372	DTO8_FUN_000321	217340_1	871583	878396	scaffold_1	-	7	8	present	present	verified	7	antiSMASH
BGC0000372|c1|13752-15223|+|AFUA_3G12930|dimethylallyl_tryptophan_synthase|EAL92290.2	DTO8_FUN_000320-T1	95.3	472	22	0	1	472	1	472	0	929	100	472	472	DTO8	BGC0000372	DTO8_FUN_000320	217341_1	869457	871372	scaffold_1	-	7	8	present	present	verified	7	antiSMASH
BGC0000372|c1|15446-17952|-|AFUA_3G12940|C6_transcription_factor|EAL92289.2	DTO8_FUN_000319-T1	96	754	29	1	1	754	1	753	0	1438	100	754	753	DTO8	BGC0000372	DTO8_FUN_000319	217342_1	866729	871372	scaffold_1	+	7	8	present	present	verified	7	antiSMASH
BGC0000372|c1|18429-19995|-|AFUA_3G12950|FAD_binding_domain_protein|EAL92288.1	DTO8_FUN_000318-T1	95.5	468	21	0	1	468	15	482	0	912	100	468	482	DTO8	BGC0000372	DTO8_FUN_000318	217343_1	864689	866297	scaffold_1	+	7	8	present	present	verified	7	antiSMASH
BGC0000372|c1|20339-22264|-|AFUA_3G12960|cytochrome_P450_monooxigenase|EAL92287.1	DTO8_FUN_000317-T1	91.5	480	30	1	1	480	1	469	0	883	87.3	550	478	DTO8	BGC0000372	DTO8_FUN_000317	217344_1	862076	864400	scaffold_1	+	7	8	present	present	verified	7	antiSMASH
BGC0000372|c1|1-1288|-|AFUA_3G12890|C6_transcription_factor|EAL92294.1	DTO9_FUN_003827-T1	93.9	411	22	2	1	411	1	408	1.35e-279	758	100	411	408	DTO9	BGC0000372	DTO9_FUN_003827	217337_1	757340	758617	scaffold_3	+	7	8	present	present	verified	7	antiSMASH
BGC0000372|c1|2582-4062|+|AFUA_3G12900|MFS_transporter,_putative|EAL92293.2	DTO9_FUN_003826-T1	96.2	449	17	0	1	449	1	449	0	873	100	449	449	DTO9	BGC0000372	DTO9_FUN_003826	217338_1	754542	756395	scaffold_3	-	7	8	present	present	verified	7	antiSMASH
BGC0000372|c1|4632-5993|-|AFUA_3G12910|O-methyltransferase|EAL92292.1	DTO9_FUN_003825-T1	96.5	433	15	0	1	433	1	433	6.39000000180969e-315	849	100	433	433	DTO9	BGC0000372	DTO9_FUN_003825	217339_1	752578	754309	scaffold_3	+	7	8	present	present	verified	7	antiSMASH
BGC0000372|c1|6329-13058|+|AFUA_3G12920|nonribosomal_peptide_synthtease|EAL92291.2	DTO9_FUN_003824-T1	93.7	2202	139	0	1	2202	1	2202	0	4070	100	2202	2202	DTO9	BGC0000372	DTO9_FUN_003824	217340_1	745656	752380	scaffold_3	-	7	8	present	present	verified	7	antiSMASH
BGC0000372|c1|13752-15223|+|AFUA_3G12930|dimethylallyl_tryptophan_synthase|EAL92290.2	DTO9_FUN_003823-T1	95.3	472	22	0	1	472	1	472	0	929	100	472	472	DTO9	BGC0000372	DTO9_FUN_003823	217341_1	743503	744974	scaffold_3	-	7	8	present	present	verified	7	antiSMASH
BGC0000372|c1|15446-17952|-|AFUA_3G12940|C6_transcription_factor|EAL92289.2	DTO9_FUN_003822-T1	96.1	741	28	1	1	741	1	740	0	1409	98.3	754	762	DTO9	BGC0000372	DTO9_FUN_003822	217342_1	740793	743268	scaffold_3	+	7	8	present	present	verified	7	antiSMASH
BGC0000372|c1|18429-19995|-|AFUA_3G12950|FAD_binding_domain_protein|EAL92288.1	DTO9_FUN_003821-T1	95.5	468	21	0	1	468	1	468	0	912	100	468	468	DTO9	BGC0000372	DTO9_FUN_003821	217343_1	738754	740320	scaffold_3	+	7	8	present	present	verified	7	antiSMASH
BGC0000372|c1|20339-22264|-|AFUA_3G12960|cytochrome_P450_monooxigenase|EAL92287.1	DTO9_FUN_003820-T1	92.3	532	30	1	19	550	1	521	0	991	96.7	550	521	DTO9	BGC0000372	DTO9_FUN_003820	217344_1	736545	738412	scaffold_3	+	7	8	present	present	verified	7	antiSMASH
BGC0000293|c1|1-7132|-|NFIA_055290|nonribosomal_peptide_synthase,_putative|EAW16180.1	DTO10_FUN_003898-T1	99.2	2354	20	0	6	2359	1	2354	0	4667	99.8	2359	2354	DTO10	BGC0000293	DTO10_FUN_003898	218616_1	1684707	1691873	scaffold_3	+	14	3	present	present	verified	14	antiSMASH
BGC0000293|c1|9058-10422|+|NFIA_055300|dimethylallyl_tryptophan_synthase,_putative|EAW16181.1	DTO10_FUN_003897-T1	100	437	0	0	1	437	1	437	0	874	100	437	437	DTO10	BGC0000293	DTO10_FUN_003897	218617_1	1681291	1682828	scaffold_3	-	14	3	present	present	verified	14	antiSMASH
BGC0000293|c1|11236-12765|+|NFIA_055310|transferase_family_protein|EAW16182.1	DTO10_FUN_003896-T1	100	509	0	0	1	509	1	509	0	1030	100	509	509	DTO10	BGC0000293	DTO10_FUN_003896	218618_1	1679065	1680625	scaffold_3	-	14	3	present	present	verified	14	antiSMASH
BGC0000293|c1|1-7132|-|NFIA_055290|nonribosomal_peptide_synthase,_putative|EAW16180.1	DTO11_FUN_007723-T1	100	2354	0	0	6	2359	1	2354	0	4713	99.8	2359	2354	DTO11	BGC0000293	DTO11_FUN_007723	218616_1	1593852	1600968	scaffold_6	+	14	3	present	present	verified	14	antiSMASH
BGC0000293|c1|9058-10422|+|NFIA_055300|dimethylallyl_tryptophan_synthase,_putative|EAW16181.1	DTO11_FUN_007722-T1	100	437	0	0	1	437	1	437	0	874	100	437	437	DTO11	BGC0000293	DTO11_FUN_007722	218617_1	1590513	1591911	scaffold_6	-	14	3	present	present	verified	14	antiSMASH
BGC0000293|c1|11236-12765|+|NFIA_055310|transferase_family_protein|EAW16182.1	DTO11_FUN_007721-T1	100	509	0	0	1	509	1	509	0	1030	100	509	509	DTO11	BGC0000293	DTO11_FUN_007721	218618_1	1588204	1589733	scaffold_6	-	14	3	present	present	verified	14	antiSMASH
BGC0000293|c1|1-7132|-|NFIA_055290|nonribosomal_peptide_synthase,_putative|EAW16180.1	DTO12_FUN_006657-T1	100	2354	0	0	6	2359	1	2354	0	4713	99.8	2359	2354	DTO12	BGC0000293	DTO12_FUN_006657	218616_1	1622655	1629771	scaffold_6	+	14	3	present	present	verified	14	antiSMASH
BGC0000293|c1|9058-10422|+|NFIA_055300|dimethylallyl_tryptophan_synthase,_putative|EAW16181.1	DTO12_FUN_006656-T1	100	437	0	0	1	437	1	437	0	874	100	437	437	DTO12	BGC0000293	DTO12_FUN_006656	218617_1	1619203	1620790	scaffold_6	-	14	3	present	present	verified	14	antiSMASH
BGC0000293|c1|11236-12765|+|NFIA_055310|transferase_family_protein|EAW16182.1	DTO12_FUN_006655-T1	100	509	0	0	1	509	1	509	0	1030	100	509	509	DTO12	BGC0000293	DTO12_FUN_006655	218618_1	1617007	1618678	scaffold_6	-	14	3	present	present	verified	14	antiSMASH
BGC0000293|c1|1-7132|-|NFIA_055290|nonribosomal_peptide_synthase,_putative|EAW16180.1	DTO13_FUN_007599-T1	99.9	2359	2	0	1	2359	1	2359	0	4719	100	2359	2359	DTO13	BGC0000293	DTO13_FUN_007599	218616_1	2398129	2405260	scaffold_5	-	14	3	present	present	verified	14	antiSMASH
BGC0000293|c1|9058-10422|+|NFIA_055300|dimethylallyl_tryptophan_synthase,_putative|EAW16181.1	DTO13_FUN_007600-T1	98.4	437	7	0	1	437	1	437	0	863	100	437	437	DTO13	BGC0000293	DTO13_FUN_007600	218617_1	2407186	2408550	scaffold_5	+	14	3	present	present	verified	14	antiSMASH
BGC0000293|c1|11236-12765|+|NFIA_055310|transferase_family_protein|EAW16182.1	DTO13_FUN_007601-T1	100	509	0	0	1	509	1	509	0	1030	100	509	509	DTO13	BGC0000293	DTO13_FUN_007601	218618_1	2409364	2410893	scaffold_5	+	14	3	present	present	verified	14	antiSMASH
BGC0000293|c1|1-7132|-|NFIA_055290|nonribosomal_peptide_synthase,_putative|EAW16180.1	DTO14_FUN_006929-T1	99.9	2359	2	0	1	2359	1	2359	0	4719	100	2359	2359	DTO14	BGC0000293	DTO14_FUN_006929	218616_1	2440723	2447854	scaffold_5	-	14	3	present	present	verified	14	antiSMASH
BGC0000293|c1|9058-10422|+|NFIA_055300|dimethylallyl_tryptophan_synthase,_putative|EAW16181.1	DTO14_FUN_006930-T1	98.4	437	7	0	1	437	1	437	0	863	100	437	437	DTO14	BGC0000293	DTO14_FUN_006930	218617_1	2449672	2451254	scaffold_5	+	14	3	present	present	verified	14	antiSMASH
BGC0000293|c1|11236-12765|+|NFIA_055310|transferase_family_protein|EAW16182.1	DTO14_FUN_006931-T1	100	509	0	0	1	509	1	509	0	1030	100	509	509	DTO14	BGC0000293	DTO14_FUN_006931	218618_1	2451958	2453487	scaffold_5	+	14	3	present	present	verified	14	antiSMASH
BGC0000293|c1|1-7132|-|NFIA_055290|nonribosomal_peptide_synthase,_putative|EAW16180.1	DTO15_FUN_006314-T1	99.9	2091	2	0	269	2359	1	2091	0	4190	88.6	2359	2091	DTO15	BGC0000293	DTO15_FUN_006314	218616_1	657558	664791	scaffold_5	+	14	3	present	present	verified	14	antiSMASH
BGC0000293|c1|9058-10422|+|NFIA_055300|dimethylallyl_tryptophan_synthase,_putative|EAW16181.1	DTO15_FUN_006313-T1	98.4	437	7	0	1	437	1	437	0	863	100	437	437	DTO15	BGC0000293	DTO15_FUN_006313	218617_1	654090	655761	scaffold_5	-	14	3	present	present	verified	14	antiSMASH
BGC0000293|c1|11236-12765|+|NFIA_055310|transferase_family_protein|EAW16182.1	DTO15_FUN_006312-T1	100	509	0	0	1	509	1	509	0	1030	100	509	509	DTO15	BGC0000293	DTO15_FUN_006312	218618_1	651976	653505	scaffold_5	-	14	3	present	present	verified	14	antiSMASH
BGC0000293|c1|1-7132|-|NFIA_055290|nonribosomal_peptide_synthase,_putative|EAW16180.1	DTO16_FUN_005800-T1	99.1	2359	21	0	1	2359	1	2359	0	4679	100	2359	2359	DTO16	BGC0000293	DTO16_FUN_005800	218616_1	2511042	2518300	scaffold_4	-	14	3	present	present	verified	14	antiSMASH
BGC0000293|c1|9058-10422|+|NFIA_055300|dimethylallyl_tryptophan_synthase,_putative|EAW16181.1	DTO16_FUN_005801-T1	98.4	437	7	0	1	437	1	437	0	863	100	437	437	DTO16	BGC0000293	DTO16_FUN_005801	218617_1	2520149	2521755	scaffold_4	+	14	3	present	present	verified	14	antiSMASH
BGC0000293|c1|11236-12765|+|NFIA_055310|transferase_family_protein|EAW16182.1	DTO16_FUN_005802-T1	100	509	0	0	1	509	1	509	0	1030	100	509	509	DTO16	BGC0000293	DTO16_FUN_005802	218618_1	2522404	2523933	scaffold_4	+	14	3	present	present	verified	14	antiSMASH
BGC0000293|c1|1-7132|-|NFIA_055290|nonribosomal_peptide_synthase,_putative|EAW16180.1	DTO1_FUN_002704-T1	99.7	2359	7	0	1	2359	1	2359	0	4705	100	2359	2359	DTO1	BGC0000293	DTO1_FUN_002704	218616_1	2553804	2560935	scaffold_2	-	14	3	present	present	verified	14	antiSMASH
BGC0000293|c1|9058-10422|+|NFIA_055300|dimethylallyl_tryptophan_synthase,_putative|EAW16181.1	DTO1_FUN_002705-T1	98.4	437	7	0	1	437	1	437	0	863	100	437	437	DTO1	BGC0000293	DTO1_FUN_002705	218617_1	2562770	2564334	scaffold_2	+	14	3	present	present	verified	14	antiSMASH
BGC0000293|c1|11236-12765|+|NFIA_055310|transferase_family_protein|EAW16182.1	DTO1_FUN_002706-T1	100	509	0	0	1	509	1	509	0	1030	100	509	509	DTO1	BGC0000293	DTO1_FUN_002706	218618_1	2565039	2566568	scaffold_2	+	14	3	present	present	verified	14	antiSMASH
BGC0000293|c1|1-7132|-|NFIA_055290|nonribosomal_peptide_synthase,_putative|EAW16180.1	DTO2_FUN_007284-T1	99.4	2354	15	0	6	2359	1	2354	0	4683	99.8	2359	2354	DTO2	BGC0000293	DTO2_FUN_007284	218616_1	1574811	1581927	scaffold_5	+	14	3	present	present	verified	14	antiSMASH
BGC0000293|c1|9058-10422|+|NFIA_055300|dimethylallyl_tryptophan_synthase,_putative|EAW16181.1	DTO2_FUN_007283-T1	100	437	0	0	1	437	1	437	0	874	100	437	437	DTO2	BGC0000293	DTO2_FUN_007283	218617_1	1571506	1572870	scaffold_5	-	14	3	present	present	verified	14	antiSMASH
BGC0000293|c1|11236-12765|+|NFIA_055310|transferase_family_protein|EAW16182.1	DTO2_FUN_007282-T1	99.8	509	1	0	1	509	1	509	0	1027	100	509	509	DTO2	BGC0000293	DTO2_FUN_007282	218618_1	1569163	1570748	scaffold_5	-	14	3	present	present	verified	14	antiSMASH
BGC0000293|c1|1-7132|-|NFIA_055290|nonribosomal_peptide_synthase,_putative|EAW16180.1	DTO3_FUN_007430-T1	100	2359	0	0	1	2359	1	2359	0	4722	100	2359	2359	DTO3	BGC0000293	DTO3_FUN_007430	218616_1	2493977	2501125	scaffold_5	-	14	3	present	present	verified	14	antiSMASH
BGC0000293|c1|9058-10422|+|NFIA_055300|dimethylallyl_tryptophan_synthase,_putative|EAW16181.1	DTO3_FUN_007431-T1	100	437	0	0	1	437	1	437	0	874	100	437	437	DTO3	BGC0000293	DTO3_FUN_007431	218617_1	2502978	2504513	scaffold_5	+	14	3	present	present	verified	14	antiSMASH
BGC0000293|c1|11236-12765|+|NFIA_055310|transferase_family_protein|EAW16182.1	DTO3_FUN_007432-T1	100	509	0	0	1	509	1	509	0	1030	100	509	509	DTO3	BGC0000293	DTO3_FUN_007432	218618_1	2505212	2506741	scaffold_5	+	14	3	present	present	verified	14	antiSMASH
BGC0000293|c1|1-7132|-|NFIA_055290|nonribosomal_peptide_synthase,_putative|EAW16180.1	DTO4_FUN_007119-T1	100	2359	0	0	1	2359	1	2359	0	4722	100	2359	2359	DTO4	BGC0000293	DTO4_FUN_007119	218616_1	1595308	1602486	scaffold_5	+	14	3	present	present	verified	14	antiSMASH
BGC0000293|c1|9058-10422|+|NFIA_055300|dimethylallyl_tryptophan_synthase,_putative|EAW16181.1	DTO4_FUN_007118-T1	100	437	0	0	1	437	1	437	0	874	100	437	437	DTO4	BGC0000293	DTO4_FUN_007118	218617_1	1592065	1593475	scaffold_5	-	14	3	present	present	verified	14	antiSMASH
BGC0000293|c1|11236-12765|+|NFIA_055310|transferase_family_protein|EAW16182.1	DTO4_FUN_007117-T1	100	509	0	0	1	509	1	509	0	1030	100	509	509	DTO4	BGC0000293	DTO4_FUN_007117	218618_1	1589722	1591251	scaffold_5	-	14	3	present	present	verified	14	antiSMASH
BGC0000293|c1|1-7132|-|NFIA_055290|nonribosomal_peptide_synthase,_putative|EAW16180.1	DTO5_FUN_007433-T1	100	2359	0	0	1	2359	1	2359	0	4722	100	2359	2359	DTO5	BGC0000293	DTO5_FUN_007433	218616_1	2495419	2503139	scaffold_5	-	14	3	present	present	verified	14	antiSMASH
BGC0000293|c1|9058-10422|+|NFIA_055300|dimethylallyl_tryptophan_synthase,_putative|EAW16181.1	DTO5_FUN_007434-T1	100	437	0	0	1	437	1	437	0	874	100	437	437	DTO5	BGC0000293	DTO5_FUN_007434	218617_1	2505065	2506429	scaffold_5	+	14	3	present	present	verified	14	antiSMASH
BGC0000293|c1|11236-12765|+|NFIA_055310|transferase_family_protein|EAW16182.1	DTO5_FUN_007435-T1	100	509	0	0	1	509	1	509	0	1030	100	509	509	DTO5	BGC0000293	DTO5_FUN_007435	218618_1	2507243	2508846	scaffold_5	+	14	3	present	present	verified	14	antiSMASH
BGC0000293|c1|1-7132|-|NFIA_055290|nonribosomal_peptide_synthase,_putative|EAW16180.1	DTO6_FUN_007218-T1	100	2354	0	0	6	2359	1	2354	0	4713	99.8	2359	2354	DTO6	BGC0000293	DTO6_FUN_007218	218616_1	1544307	1551492	scaffold_5	+	14	3	present	present	verified	14	antiSMASH
BGC0000293|c1|9058-10422|+|NFIA_055300|dimethylallyl_tryptophan_synthase,_putative|EAW16181.1	DTO6_FUN_007217-T1	100	437	0	0	1	437	1	437	0	874	100	437	437	DTO6	BGC0000293	DTO6_FUN_007217	218617_1	1540935	1542421	scaffold_5	-	14	3	present	present	verified	14	antiSMASH
BGC0000293|c1|11236-12765|+|NFIA_055310|transferase_family_protein|EAW16182.1	DTO6_FUN_007216-T1	100	509	0	0	1	509	1	509	0	1030	100	509	509	DTO6	BGC0000293	DTO6_FUN_007216	218618_1	1538659	1540188	scaffold_5	-	14	3	present	present	verified	14	antiSMASH
BGC0000293|c1|1-7132|-|NFIA_055290|nonribosomal_peptide_synthase,_putative|EAW16180.1	DTO7_FUN_007474-T1	99.2	2359	19	0	1	2359	1	2359	0	4680	100	2359	2359	DTO7	BGC0000293	DTO7_FUN_007474	218616_1	2152735	2159866	scaffold_5	-	14	3	present	present	verified	14	antiSMASH
BGC0000293|c1|9058-10422|+|NFIA_055300|dimethylallyl_tryptophan_synthase,_putative|EAW16181.1	DTO7_FUN_007475-T1	99.5	437	2	0	1	437	1	437	0	870	100	437	437	DTO7	BGC0000293	DTO7_FUN_007475	218617_1	2161730	2163217	scaffold_5	+	14	3	present	present	verified	14	antiSMASH
BGC0000293|c1|11236-12765|+|NFIA_055310|transferase_family_protein|EAW16182.1	DTO7_FUN_007476-T1	99.8	509	1	0	1	509	1	509	0	1027	100	509	509	DTO7	BGC0000293	DTO7_FUN_007476	218618_1	2163964	2165493	scaffold_5	+	14	3	present	present	verified	14	antiSMASH
BGC0000293|c1|1-7132|-|NFIA_055290|nonribosomal_peptide_synthase,_putative|EAW16180.1	DTO8_FUN_005597-T1	99.2	2359	20	0	1	2359	1	2359	0	4675	100	2359	2359	DTO8	BGC0000293	DTO8_FUN_005597	218616_1	1690988	1698119	scaffold_4	+	14	3	present	present	verified	14	antiSMASH
BGC0000293|c1|9058-10422|+|NFIA_055300|dimethylallyl_tryptophan_synthase,_putative|EAW16181.1	DTO8_FUN_005596-T1	100	437	0	0	1	437	1	437	0	874	100	437	437	DTO8	BGC0000293	DTO8_FUN_005596	218617_1	1687657	1689176	scaffold_4	-	14	3	present	present	verified	14	antiSMASH
BGC0000293|c1|11236-12765|+|NFIA_055310|transferase_family_protein|EAW16182.1	DTO8_FUN_005595-T1	100	509	0	0	1	509	1	509	0	1030	100	509	509	DTO8	BGC0000293	DTO8_FUN_005595	218618_1	1685361	1686896	scaffold_4	-	14	3	present	present	verified	14	antiSMASH
BGC0000293|c1|1-7132|-|NFIA_055290|nonribosomal_peptide_synthase,_putative|EAW16180.1	DTO9_FUN_007673-T1	99.1	2359	21	0	1	2359	1	2359	0	4679	100	2359	2359	DTO9	BGC0000293	DTO9_FUN_007673	218616_1	2429081	2436212	scaffold_5	-	14	3	present	present	verified	14	antiSMASH
BGC0000293|c1|9058-10422|+|NFIA_055300|dimethylallyl_tryptophan_synthase,_putative|EAW16181.1	DTO9_FUN_007675-T1	98.4	437	7	0	1	437	1	437	0	863	100	437	437	DTO9	BGC0000293	DTO9_FUN_007675	218617_1	2438047	2439630	scaffold_5	+	14	3	present	present	verified	14	antiSMASH
BGC0000293|c1|11236-12765|+|NFIA_055310|transferase_family_protein|EAW16182.1	DTO9_FUN_007676-T1	100	509	0	0	1	509	1	509	0	1030	100	509	509	DTO9	BGC0000293	DTO9_FUN_007676	218618_1	2440278	2441926	scaffold_5	+	14	3	present	present	verified	14	antiSMASH
BGC0000420|c1|2640-3978|+|PCH_Pc21g15430|dimethylallyltryptophan_synthase|CAP96440.1	DTO10_FUN_002003-T1	67.1	392	124	4	1	390	1	389	1.21e-190	533	92.4	422	390	DTO10	BGC0000420	DTO10_FUN_002003	219456_1	694169	696488	scaffold_2	+	18	7	present	present	verified	18	antiSMASH
BGC0000420|c1|11020-12665|-|PCH_Pc21g15470|cytochrome_P450_oxidoreductase|CAP96444.1	DTO10_FUN_002004-T1	60.9	527	178	6	1	511	5	519	5.15e-213	598	100	511	519	DTO10	BGC0000420	DTO10_FUN_002004	219457_1	696842	698520	scaffold_2	-	18	7	present	present	verified	18	antiSMASH
BGC0000420|c1|13202-20659|+|PCH_Pc21g15480|NRPS|CAP96445.1	DTO10_FUN_002005-T1	58.6	1894	728	20	173	2054	1	1850	0	2117	79.3	2372	1864	DTO10	BGC0000420	DTO10_FUN_002005	219458_1	699874	705530	scaffold_2	+	18	7	present	present	verified	18	antiSMASH
BGC0000420|c1|13202-20659|+|PCH_Pc21g15480|NRPS|CAP96445.1	DTO10_FUN_002006-T1	54.5	290	121	2	2080	2361	1	287	1.46e-94	307	11.9	2372	295	DTO10	BGC0000420	DTO10_FUN_002006	229315_1	705569	706520	scaffold_2	+	18	7	present	present	verified	18	antiSMASH
BGC0000420|c1|2640-3978|+|PCH_Pc21g15430|dimethylallyltryptophan_synthase|CAP96440.1	DTO11_FUN_003703-T1	67.1	392	124	4	1	390	1	389	1.17e-190	533	92.4	422	390	DTO11	BGC0000420	DTO11_FUN_003703	219456_1	574167	576272	scaffold_3	+	18	7	present	present	verified	18	antiSMASH
BGC0000420|c1|11020-12665|-|PCH_Pc21g15470|cytochrome_P450_oxidoreductase|CAP96444.1	DTO11_FUN_003704-T1	60.9	527	178	6	1	511	5	519	1.01e-212	597	100	511	519	DTO11	BGC0000420	DTO11_FUN_003704	219457_1	576705	578383	scaffold_3	-	18	7	present	present	verified	18	antiSMASH
BGC0000420|c1|13202-20659|+|PCH_Pc21g15480|NRPS|CAP96445.1	DTO11_FUN_003705-T1	59.9	2207	843	17	173	2361	1	2184	0	2571	92.3	2372	2192	DTO11	BGC0000420	DTO11_FUN_003705	219458_1	579738	586819	scaffold_3	+	18	7	present	present	verified	18	antiSMASH
BGC0000420|c1|2640-3978|+|PCH_Pc21g15430|dimethylallyltryptophan_synthase|CAP96440.1	DTO12_FUN_001289-T1	67.1	392	124	4	1	390	1	389	1.24e-190	533	92.4	422	390	DTO12	BGC0000420	DTO12_FUN_001289	219456_1	3478412	3479960	scaffold_1	-	18	7	present	present	verified	18	antiSMASH
BGC0000420|c1|11020-12665|-|PCH_Pc21g15470|cytochrome_P450_oxidoreductase|CAP96444.1	DTO12_FUN_001288-T1	60.9	527	178	6	1	511	5	519	1.07e-212	597	100	511	519	DTO12	BGC0000420	DTO12_FUN_001288	219457_1	3476306	3477984	scaffold_1	+	18	7	present	present	verified	18	antiSMASH
BGC0000420|c1|13202-20659|+|PCH_Pc21g15480|NRPS|CAP96445.1	DTO12_FUN_001287-T1	59.9	2207	843	17	173	2361	1	2184	0	2571	92.3	2372	2192	DTO12	BGC0000420	DTO12_FUN_001287	219458_1	3468309	3474951	scaffold_1	-	18	7	present	present	verified	18	antiSMASH
BGC0000420|c1|2640-3978|+|PCH_Pc21g15430|dimethylallyltryptophan_synthase|CAP96440.1	DTO13_FUN_006491-T1	67.6	426	131	5	1	422	1	423	1.35e-209	582	100	422	423	DTO13	BGC0000420	DTO13_FUN_006491	219456_1	3524810	3526133	scaffold_4	-	18	7	present	present	verified	18	antiSMASH
BGC0000420|c1|11020-12665|-|PCH_Pc21g15470|cytochrome_P450_oxidoreductase|CAP96444.1	DTO13_FUN_006490-T1	60.9	527	178	6	1	511	5	519	1.02e-212	597	100	511	519	DTO13	BGC0000420	DTO13_FUN_006490	219457_1	3522477	3524155	scaffold_4	+	18	7	present	present	verified	18	antiSMASH
BGC0000420|c1|13202-20659|+|PCH_Pc21g15480|NRPS|CAP96445.1	DTO13_FUN_006489-T1	59.9	2207	843	17	173	2361	1	2184	0	2571	92.3	2372	2192	DTO13	BGC0000420	DTO13_FUN_006489	219458_1	3514480	3521122	scaffold_4	-	18	7	present	present	verified	18	antiSMASH
BGC0000420|c1|2640-3978|+|PCH_Pc21g15430|dimethylallyltryptophan_synthase|CAP96440.1	DTO14_FUN_008029-T1	67.6	426	131	5	1	422	1	423	1.4e-209	582	100	422	423	DTO14	BGC0000420	DTO14_FUN_008029	219456_1	2304462	2305958	scaffold_6	-	18	7	present	present	verified	18	antiSMASH
BGC0000420|c1|11020-12665|-|PCH_Pc21g15470|cytochrome_P450_oxidoreductase|CAP96444.1	DTO14_FUN_008028-T1	69.9	385	111	2	132	511	1	385	1.05e-191	539	74.4	511	385	DTO14	BGC0000420	DTO14_FUN_008028	219457_1	2302431	2304125	scaffold_6	+	18	7	present	present	verified	18	antiSMASH
BGC0000420|c1|13202-20659|+|PCH_Pc21g15480|NRPS|CAP96445.1	DTO14_FUN_008027-T1	59.9	2207	844	17	173	2361	1	2184	0	2568	92.3	2372	2192	DTO14	BGC0000420	DTO14_FUN_008027	219458_1	2294305	2300947	scaffold_6	-	18	7	present	present	verified	18	antiSMASH
BGC0000420|c1|2640-3978|+|PCH_Pc21g15430|dimethylallyltryptophan_synthase|CAP96440.1	DTO15_FUN_007440-T1	67.1	392	124	4	1	390	1	389	1.23e-190	533	92.4	422	390	DTO15	BGC0000420	DTO15_FUN_007440	219456_1	571931	574160	scaffold_6	+	18	7	present	present	verified	18	antiSMASH
BGC0000420|c1|11020-12665|-|PCH_Pc21g15470|cytochrome_P450_oxidoreductase|CAP96444.1	DTO15_FUN_007441-T1	60.9	527	178	6	1	511	5	519	1.05e-212	597	100	511	519	DTO15	BGC0000420	DTO15_FUN_007441	219457_1	574591	576269	scaffold_6	-	18	7	present	present	verified	18	antiSMASH
BGC0000420|c1|13202-20659|+|PCH_Pc21g15480|NRPS|CAP96445.1	DTO15_FUN_007442-T1	59.8	2169	831	17	173	2323	1	2146	0	2512	90.7	2372	2155	DTO15	BGC0000420	DTO15_FUN_007442	219458_1	576160	584702	scaffold_6	+	18	7	present	present	verified	18	antiSMASH
BGC0000420|c1|2640-3978|+|PCH_Pc21g15430|dimethylallyltryptophan_synthase|CAP96440.1	DTO16_FUN_004690-T1	67.6	426	131	5	1	422	1	423	1.34e-209	582	100	422	423	DTO16	BGC0000420	DTO16_FUN_004690	219456_1	3559297	3560620	scaffold_3	-	18	7	present	present	verified	18	antiSMASH
BGC0000420|c1|11020-12665|-|PCH_Pc21g15470|cytochrome_P450_oxidoreductase|CAP96444.1	DTO16_FUN_004689-T1	69.9	385	111	2	132	511	1	385	1.01e-191	539	74.4	511	385	DTO16	BGC0000420	DTO16_FUN_004689	219457_1	3556168	3558714	scaffold_3	+	18	7	present	present	verified	18	antiSMASH
BGC0000420|c1|13202-20659|+|PCH_Pc21g15480|NRPS|CAP96445.1	DTO16_FUN_004688-T1	59.9	2207	843	17	173	2361	1	2184	0	2571	92.3	2372	2192	DTO16	BGC0000420	DTO16_FUN_004688	219458_1	3548967	3555966	scaffold_3	-	18	7	present	present	verified	18	antiSMASH
BGC0000420|c1|2640-3978|+|PCH_Pc21g15430|dimethylallyltryptophan_synthase|CAP96440.1	DTO1_FUN_003517-T1	67.4	426	132	5	1	422	1	423	1.14e-208	580	100	422	423	DTO1	BGC0000420	DTO1_FUN_003517	219456_1	576460	578056	scaffold_3	+	18	7	present	present	verified	18	antiSMASH
BGC0000420|c1|11020-12665|-|PCH_Pc21g15470|cytochrome_P450_oxidoreductase|CAP96444.1	DTO1_FUN_003518-T1	60.9	527	178	6	1	511	5	519	1.05e-212	597	100	511	519	DTO1	BGC0000420	DTO1_FUN_003518	219457_1	578479	580157	scaffold_3	-	18	7	present	present	verified	18	antiSMASH
BGC0000420|c1|13202-20659|+|PCH_Pc21g15480|NRPS|CAP96445.1	DTO1_FUN_003519-T1	59.8	2169	830	17	173	2323	1	2146	0	2515	90.7	2372	2155	DTO1	BGC0000420	DTO1_FUN_003519	219458_1	581512	588592	scaffold_3	+	18	7	present	present	verified	18	antiSMASH
BGC0000420|c1|2640-3978|+|PCH_Pc21g15430|dimethylallyltryptophan_synthase|CAP96440.1	DTO2_FUN_005476-T1	67.6	426	131	5	1	422	1	423	1.34e-209	582	100	422	423	DTO2	BGC0000420	DTO2_FUN_005476	219456_1	569359	570762	scaffold_4	+	18	7	present	present	verified	18	antiSMASH
BGC0000420|c1|11020-12665|-|PCH_Pc21g15470|cytochrome_P450_oxidoreductase|CAP96444.1	DTO2_FUN_005477-T1	69.9	385	111	2	132	511	1	385	4.99e-192	540	74.4	511	385	DTO2	BGC0000420	DTO2_FUN_005477	219457_1	571416	573089	scaffold_4	-	18	7	present	present	verified	18	antiSMASH
BGC0000420|c1|13202-20659|+|PCH_Pc21g15480|NRPS|CAP96445.1	DTO2_FUN_005478-T1	59.9	2207	843	17	173	2361	1	2184	0	2572	92.3	2372	2192	DTO2	BGC0000420	DTO2_FUN_005478	219458_1	574448	581520	scaffold_4	+	18	7	present	present	verified	18	antiSMASH
BGC0000420|c1|2640-3978|+|PCH_Pc21g15430|dimethylallyltryptophan_synthase|CAP96440.1	DTO3_FUN_006305-T1	67.6	426	131	5	1	422	1	423	1.35e-209	582	100	422	423	DTO3	BGC0000420	DTO3_FUN_006305	219456_1	3575955	3577335	scaffold_4	-	18	7	present	present	verified	18	antiSMASH
BGC0000420|c1|11020-12665|-|PCH_Pc21g15470|cytochrome_P450_oxidoreductase|CAP96444.1	DTO3_FUN_006304-T1	60.9	527	178	6	1	511	5	519	1.02e-212	597	100	511	519	DTO3	BGC0000420	DTO3_FUN_006304	219457_1	3573490	3575418	scaffold_4	+	18	7	present	present	verified	18	antiSMASH
BGC0000420|c1|13202-20659|+|PCH_Pc21g15480|NRPS|CAP96445.1	DTO3_FUN_006303-T1	59.9	2207	843	17	173	2361	1	2184	0	2571	92.3	2372	2192	DTO3	BGC0000420	DTO3_FUN_006303	219458_1	3565186	3572267	scaffold_4	-	18	7	present	present	verified	18	antiSMASH
BGC0000420|c1|2640-3978|+|PCH_Pc21g15430|dimethylallyltryptophan_synthase|CAP96440.1	DTO4_FUN_006317-T1	67.6	426	131	5	1	422	1	423	1.36e-209	582	100	422	423	DTO4	BGC0000420	DTO4_FUN_006317	219456_1	3578144	3579467	scaffold_4	-	18	7	present	present	verified	18	antiSMASH
BGC0000420|c1|11020-12665|-|PCH_Pc21g15470|cytochrome_P450_oxidoreductase|CAP96444.1	DTO4_FUN_006316-T1	69.9	385	111	2	132	511	1	385	1.02e-191	539	74.4	511	385	DTO4	BGC0000420	DTO4_FUN_006316	219457_1	3576332	3577489	scaffold_4	+	18	7	present	present	verified	18	antiSMASH
BGC0000420|c1|13202-20659|+|PCH_Pc21g15480|NRPS|CAP96445.1	DTO4_FUN_006314-T1	59.9	2207	843	17	173	2361	1	2184	0	2571	92.3	2372	2192	DTO4	BGC0000420	DTO4_FUN_006314	219458_1	3567747	3574543	scaffold_4	-	18	7	present	present	verified	18	antiSMASH
BGC0000420|c1|2640-3978|+|PCH_Pc21g15430|dimethylallyltryptophan_synthase|CAP96440.1	DTO5_FUN_006316-T1	67.6	426	131	5	1	422	1	423	1.35e-209	582	100	422	423	DTO5	BGC0000420	DTO5_FUN_006316	219456_1	3576472	3577795	scaffold_4	-	18	7	present	present	verified	18	antiSMASH
BGC0000420|c1|11020-12665|-|PCH_Pc21g15470|cytochrome_P450_oxidoreductase|CAP96444.1	DTO5_FUN_006315-T1	60.9	527	178	6	1	511	5	519	1.02e-212	597	100	511	519	DTO5	BGC0000420	DTO5_FUN_006315	219457_1	3574139	3575817	scaffold_4	+	18	7	present	present	verified	18	antiSMASH
BGC0000420|c1|13202-20659|+|PCH_Pc21g15480|NRPS|CAP96445.1	DTO5_FUN_006314-T1	59.9	2207	843	17	173	2361	1	2184	0	2571	92.3	2372	2192	DTO5	BGC0000420	DTO5_FUN_006314	219458_1	3566142	3572920	scaffold_4	-	18	7	present	present	verified	18	antiSMASH
BGC0000420|c1|2640-3978|+|PCH_Pc21g15430|dimethylallyltryptophan_synthase|CAP96440.1	DTO6_FUN_005356-T1	67.6	426	131	5	1	422	1	423	1.36e-209	582	100	422	423	DTO6	BGC0000420	DTO6_FUN_005356	219456_1	567338	569732	scaffold_4	+	18	7	present	present	verified	18	antiSMASH
BGC0000420|c1|11020-12665|-|PCH_Pc21g15470|cytochrome_P450_oxidoreductase|CAP96444.1	DTO6_FUN_005357-T1	60.9	527	178	6	1	511	5	519	1.03e-212	597	100	511	519	DTO6	BGC0000420	DTO6_FUN_005357	219457_1	569929	571607	scaffold_4	-	18	7	present	present	verified	18	antiSMASH
BGC0000420|c1|13202-20659|+|PCH_Pc21g15480|NRPS|CAP96445.1	DTO6_FUN_005358-T1	59.9	2207	843	17	173	2361	1	2184	0	2571	92.3	2372	2192	DTO6	BGC0000420	DTO6_FUN_005358	219458_1	571479	580044	scaffold_4	+	18	7	present	present	verified	18	antiSMASH
BGC0000420|c1|2640-3978|+|PCH_Pc21g15430|dimethylallyltryptophan_synthase|CAP96440.1	DTO7_FUN_005504-T1	67.6	426	131	5	1	422	1	423	1.35e-209	582	100	422	423	DTO7	BGC0000420	DTO7_FUN_005504	219456_1	624194	625613	scaffold_4	+	18	7	present	present	verified	18	antiSMASH
BGC0000420|c1|11020-12665|-|PCH_Pc21g15470|cytochrome_P450_oxidoreductase|CAP96444.1	DTO7_FUN_005505-T1	60.9	527	178	6	1	511	5	519	5.08e-213	598	100	511	519	DTO7	BGC0000420	DTO7_FUN_005505	219457_1	626268	627946	scaffold_4	-	18	7	present	present	verified	18	antiSMASH
BGC0000420|c1|13202-20659|+|PCH_Pc21g15480|NRPS|CAP96445.1	DTO7_FUN_005506-T1	59.9	2169	829	17	173	2323	1	2146	0	2516	90.7	2372	2155	DTO7	BGC0000420	DTO7_FUN_005506	219458_1	629300	636370	scaffold_4	+	18	7	present	present	verified	18	antiSMASH
BGC0000420|c1|2640-3978|+|PCH_Pc21g15430|dimethylallyltryptophan_synthase|CAP96440.1	DTO8_FUN_004762-T1	67.6	426	131	5	1	422	1	423	1.42e-209	582	100	422	423	DTO8	BGC0000420	DTO8_FUN_004762	219456_1	3630973	3632626	scaffold_3	-	18	7	present	present	verified	18	antiSMASH
BGC0000420|c1|11020-12665|-|PCH_Pc21g15470|cytochrome_P450_oxidoreductase|CAP96444.1	DTO8_FUN_004761-T1	60.9	527	178	6	1	511	5	519	5.34e-213	598	100	511	519	DTO8	BGC0000420	DTO8_FUN_004761	219457_1	3628907	3630585	scaffold_3	+	18	7	present	present	verified	18	antiSMASH
BGC0000420|c1|13202-20659|+|PCH_Pc21g15480|NRPS|CAP96445.1	DTO8_FUN_004760-T1	59.5	1894	707	17	173	2054	1	1846	0	2172	79.3	2372	1860	DTO8	BGC0000420	DTO8_FUN_004760	219458_1	3621897	3627553	scaffold_3	-	18	7	present	present	verified	18	antiSMASH
BGC0000420|c1|13202-20659|+|PCH_Pc21g15480|NRPS|CAP96445.1	DTO8_FUN_004759-T1	54.5	290	121	2	2080	2361	1	287	1.51e-94	307	11.9	2372	295	DTO8	BGC0000420	DTO8_FUN_004759	229315_1	3620907	3621858	scaffold_3	-	18	7	present	present	verified	18	antiSMASH
BGC0000420|c1|2640-3978|+|PCH_Pc21g15430|dimethylallyltryptophan_synthase|CAP96440.1	DTO9_FUN_006559-T1	67.6	426	131	5	1	422	1	423	1.37e-209	582	100	422	423	DTO9	BGC0000420	DTO9_FUN_006559	219456_1	3467651	3468974	scaffold_4	-	18	7	present	present	verified	18	antiSMASH
BGC0000420|c1|11020-12665|-|PCH_Pc21g15470|cytochrome_P450_oxidoreductase|CAP96444.1	DTO9_FUN_006558-T1	60.7	527	179	6	1	511	5	519	2.95e-212	596	100	511	519	DTO9	BGC0000420	DTO9_FUN_006558	219457_1	3465318	3466996	scaffold_4	+	18	7	present	present	verified	18	antiSMASH
BGC0000420|c1|13202-20659|+|PCH_Pc21g15480|NRPS|CAP96445.1	DTO9_FUN_006557-T1	60	2207	842	17	173	2361	1	2184	0	2573	92.3	2372	2192	DTO9	BGC0000420	DTO9_FUN_006557	219458_1	3456886	3464464	scaffold_4	-	18	7	present	present	verified	18	antiSMASH
BGC0002276|c1|1-3813|+|AN5318.2|hypothetical_protein|EAA62478.1	DTO10_FUN_002309-T1	80.1	1274	248	4	1	1270	1	1273	0	2042	100	1270	1273	DTO10	BGC0002276	DTO10_FUN_002309	219781_1	1471882	1475703	scaffold_2	-	19	1	present	present	verified	19	antiSMASH
BGC0002276|c1|1-3813|+|AN5318.2|hypothetical_protein|EAA62478.1	DTO11_FUN_004007-T1	80.2	1274	247	4	1	1270	1	1273	0	2046	100	1270	1273	DTO11	BGC0002276	DTO11_FUN_004007	219781_1	1346500	1350321	scaffold_3	-	19	1	present	present	verified	19	antiSMASH
BGC0002276|c1|1-3813|+|AN5318.2|hypothetical_protein|EAA62478.1	DTO12_FUN_000978-T1	80.2	1274	247	4	1	1270	1	1273	0	2046	100	1270	1273	DTO12	BGC0002276	DTO12_FUN_000978	219781_1	2704803	2709098	scaffold_1	+	19	1	present	present	verified	19	antiSMASH
BGC0002276|c1|1-3813|+|AN5318.2|hypothetical_protein|EAA62478.1	DTO13_FUN_006186-T1	80.2	1274	247	4	1	1270	1	1273	0	2046	100	1270	1273	DTO13	BGC0002276	DTO13_FUN_006186	219781_1	2751165	2754986	scaffold_4	+	19	1	present	present	verified	19	antiSMASH
BGC0002276|c1|1-3813|+|AN5318.2|hypothetical_protein|EAA62478.1	DTO14_FUN_007722-T1	80.1	1274	248	4	1	1270	1	1273	0	2043	100	1270	1273	DTO14	BGC0002276	DTO14_FUN_007722	219781_1	1524795	1529131	scaffold_6	+	19	1	present	present	verified	19	antiSMASH
BGC0002276|c1|1-3813|+|AN5318.2|hypothetical_protein|EAA62478.1	DTO15_FUN_007755-T1	80.1	1274	248	4	1	1270	1	1273	0	2043	100	1270	1273	DTO15	BGC0002276	DTO15_FUN_007755	219781_1	1349499	1353320	scaffold_6	-	19	1	present	present	verified	19	antiSMASH
BGC0002276|c1|1-3813|+|AN5318.2|hypothetical_protein|EAA62478.1	DTO16_FUN_004391-T1	80.2	1274	247	4	1	1270	1	1273	0	2046	100	1270	1273	DTO16	BGC0002276	DTO16_FUN_004391	219781_1	2783066	2787538	scaffold_3	+	19	1	present	present	verified	19	antiSMASH
BGC0002276|c1|1-3813|+|AN5318.2|hypothetical_protein|EAA62478.1	DTO1_FUN_003829-T1	80.2	1274	247	4	1	1270	1	1273	0	2046	100	1270	1273	DTO1	BGC0002276	DTO1_FUN_003829	219781_1	1348958	1352779	scaffold_3	-	19	1	present	present	verified	19	antiSMASH
BGC0002276|c1|1-3813|+|AN5318.2|hypothetical_protein|EAA62478.1	DTO2_FUN_005776-T1	80.1	1274	248	4	1	1270	1	1273	0	2042	100	1270	1273	DTO2	BGC0002276	DTO2_FUN_005776	219781_1	1341908	1345729	scaffold_4	-	19	1	present	present	verified	19	antiSMASH
BGC0002276|c1|1-3813|+|AN5318.2|hypothetical_protein|EAA62478.1	DTO3_FUN_006004-T1	80.1	1274	248	4	1	1270	1	1273	0	2042	100	1270	1273	DTO3	BGC0002276	DTO3_FUN_006004	219781_1	2801664	2805854	scaffold_4	+	19	1	present	present	verified	19	antiSMASH
BGC0002276|c1|1-3813|+|AN5318.2|hypothetical_protein|EAA62478.1	DTO4_FUN_006014-T1	80.1	1274	248	4	1	1270	1	1273	0	2042	100	1270	1273	DTO4	BGC0002276	DTO4_FUN_006014	219781_1	2803635	2808048	scaffold_4	+	19	1	present	present	verified	19	antiSMASH
BGC0002276|c1|1-3813|+|AN5318.2|hypothetical_protein|EAA62478.1	DTO5_FUN_006015-T1	80.1	1274	248	4	1	1270	1	1273	0	2042	100	1270	1273	DTO5	BGC0002276	DTO5_FUN_006015	219781_1	2802092	2806479	scaffold_4	+	19	1	present	present	verified	19	antiSMASH
BGC0002276|c1|1-3813|+|AN5318.2|hypothetical_protein|EAA62478.1	DTO6_FUN_005666-T1	80.1	1274	248	4	1	1270	1	1273	0	2042	100	1270	1273	DTO6	BGC0002276	DTO6_FUN_005666	219781_1	1339400	1343727	scaffold_4	-	19	1	present	present	verified	19	antiSMASH
BGC0002276|c1|1-3813|+|AN5318.2|hypothetical_protein|EAA62478.1	DTO7_FUN_005803-T1	80.1	1274	249	4	1	1270	1	1273	0	2039	100	1270	1273	DTO7	BGC0002276	DTO7_FUN_005803	219781_1	1399116	1403398	scaffold_4	-	19	1	present	present	verified	19	antiSMASH
BGC0002276|c1|1-3813|+|AN5318.2|hypothetical_protein|EAA62478.1	DTO8_FUN_004459-T1	80.1	1274	248	4	1	1270	1	1273	0	2042	100	1270	1273	DTO8	BGC0002276	DTO8_FUN_004459	219781_1	2851335	2855660	scaffold_3	+	19	1	present	present	verified	19	antiSMASH
BGC0002276|c1|1-3813|+|AN5318.2|hypothetical_protein|EAA62478.1	DTO9_FUN_006248-T1	80.2	1274	247	4	1	1270	1	1273	0	2046	100	1270	1273	DTO9	BGC0002276	DTO9_FUN_006248	219781_1	2693785	2698062	scaffold_4	+	19	1	present	present	verified	19	antiSMASH
BGC0001248|c1|1353-4192|+|ACF70484.1|oxidosqualene_clavarinone_cyclase|ACF70484.1	DTO10_FUN_002871-T1	51	722	341	5	8	721	19	735	3.88e-269	758	99	721	735	DTO10	BGC0001248	DTO10_FUN_002871	220341_1	3122832	3125513	scaffold_2	-	20	1	present	present	verified	20	antiSMASH
BGC0001248|c1|1353-4192|+|ACF70484.1|oxidosqualene_clavarinone_cyclase|ACF70484.1	DTO11_FUN_006524-T1	51	722	341	5	8	721	19	735	3.78e-269	758	99	721	735	DTO11	BGC0001248	DTO11_FUN_006524	220341_1	1146362	1149019	scaffold_5	+	20	1	present	present	verified	20	antiSMASH
BGC0001248|c1|1353-4192|+|ACF70484.1|oxidosqualene_clavarinone_cyclase|ACF70484.1	DTO12_FUN_000405-T1	51	722	341	5	8	721	19	735	4e-269	758	99	721	735	DTO12	BGC0001248	DTO12_FUN_000405	220341_1	1076320	1078999	scaffold_1	+	20	1	present	present	verified	20	antiSMASH
BGC0001248|c1|1353-4192|+|ACF70484.1|oxidosqualene_clavarinone_cyclase|ACF70484.1	DTO13_FUN_005624-T1	51	722	341	5	8	721	19	735	3.81e-269	758	99	721	735	DTO13	BGC0001248	DTO13_FUN_005624	220341_1	1126016	1128670	scaffold_4	+	20	1	present	present	verified	20	antiSMASH
BGC0001248|c1|1353-4192|+|ACF70484.1|oxidosqualene_clavarinone_cyclase|ACF70484.1	DTO14_FUN_010081-T1	51	722	341	5	8	721	19	735	3.97e-269	758	99	721	735	DTO14	BGC0001248	DTO14_FUN_010081	220341_1	1132980	1135650	scaffold_9	+	20	1	present	present	verified	20	antiSMASH
BGC0001248|c1|1353-4192|+|ACF70484.1|oxidosqualene_clavarinone_cyclase|ACF70484.1	DTO15_FUN_010541-T1	51	722	341	5	8	721	19	735	3.95e-269	758	99	721	735	DTO15	BGC0001248	DTO15_FUN_010541	220341_1	1127697	1130358	scaffold_10	+	20	1	present	present	verified	20	antiSMASH
BGC0001248|c1|1353-4192|+|ACF70484.1|oxidosqualene_clavarinone_cyclase|ACF70484.1	DTO16_FUN_003844-T1	51	722	341	5	8	721	19	735	3.81e-269	758	99	721	735	DTO16	BGC0001248	DTO16_FUN_003844	220341_1	1147006	1149537	scaffold_3	+	20	1	present	present	verified	20	antiSMASH
BGC0001248|c1|1353-4192|+|ACF70484.1|oxidosqualene_clavarinone_cyclase|ACF70484.1	DTO1_FUN_004384-T1	51	722	341	5	8	721	19	735	3.96e-269	758	99	721	735	DTO1	BGC0001248	DTO1_FUN_004384	220341_1	2966687	2969362	scaffold_3	-	20	1	present	present	verified	20	antiSMASH
BGC0001248|c1|1353-4192|+|ACF70484.1|oxidosqualene_clavarinone_cyclase|ACF70484.1	DTO2_FUN_006331-T1	50.1	722	337	6	8	721	19	725	2.31e-260	735	99	721	725	DTO2	BGC0001248	DTO2_FUN_006331	220341_1	3012504	3015184	scaffold_4	-	20	1	present	present	verified	20	antiSMASH
BGC0001248|c1|1353-4192|+|ACF70484.1|oxidosqualene_clavarinone_cyclase|ACF70484.1	DTO3_FUN_005460-T1	51	722	341	5	8	721	19	735	3.82e-269	758	99	721	735	DTO3	BGC0001248	DTO3_FUN_005460	220341_1	1171400	1173971	scaffold_4	+	20	1	present	present	verified	20	antiSMASH
BGC0001248|c1|1353-4192|+|ACF70484.1|oxidosqualene_clavarinone_cyclase|ACF70484.1	DTO4_FUN_005474-T1	51	722	341	5	8	721	19	735	3.85e-269	758	99	721	735	DTO4	BGC0001248	DTO4_FUN_005474	220341_1	1173569	1176162	scaffold_4	+	20	1	present	present	verified	20	antiSMASH
BGC0001248|c1|1353-4192|+|ACF70484.1|oxidosqualene_clavarinone_cyclase|ACF70484.1	DTO5_FUN_005463-T1	51	722	341	5	8	721	19	735	3.82e-269	758	99	721	735	DTO5	BGC0001248	DTO5_FUN_005463	220341_1	1171887	1174555	scaffold_4	+	20	1	present	present	verified	20	antiSMASH
BGC0001248|c1|1353-4192|+|ACF70484.1|oxidosqualene_clavarinone_cyclase|ACF70484.1	DTO6_FUN_006221-T1	51	722	341	5	8	721	19	735	3.85e-269	758	99	721	735	DTO6	BGC0001248	DTO6_FUN_006221	220341_1	2971208	2973878	scaffold_4	-	20	1	present	present	verified	20	antiSMASH
BGC0001248|c1|1353-4192|+|ACF70484.1|oxidosqualene_clavarinone_cyclase|ACF70484.1	DTO7_FUN_006349-T1	50.8	722	342	5	8	721	19	735	2.19e-268	756	99	721	735	DTO7	BGC0001248	DTO7_FUN_006349	220341_1	2980121	2982801	scaffold_4	-	20	1	present	present	verified	20	antiSMASH
BGC0001248|c1|1353-4192|+|ACF70484.1|oxidosqualene_clavarinone_cyclase|ACF70484.1	DTO8_FUN_003907-T1	51	722	341	5	8	721	19	735	4.03e-269	758	99	721	735	DTO8	BGC0001248	DTO8_FUN_003907	220341_1	1201897	1204577	scaffold_3	+	20	1	present	present	verified	20	antiSMASH
BGC0001248|c1|1353-4192|+|ACF70484.1|oxidosqualene_clavarinone_cyclase|ACF70484.1	DTO9_FUN_005695-T1	51	722	341	5	8	721	19	735	2.74e-269	758	99	721	735	DTO9	BGC0001248	DTO9_FUN_005695	220341_1	1075255	1077935	scaffold_4	+	20	1	present	present	verified	20	antiSMASH
BGC0001990|c1|131-1814|-|AFUA_5G02620|P450_family_sporulation-specific_N-formyltyrosine_oxidase_Dit2,_putative|XP_748080.1	DTO10_FUN_003026-T1	98.3	481	8	0	44	524	1	481	0	961	89.4	538	507	DTO10	BGC0001990	DTO10_FUN_003026	220492_1	3532459	3534096	scaffold_2	+	21	7	present	present	verified	21	antiSMASH
BGC0001990|c1|2040-2779|+|AFUA_5G02630|conserved_hypothetical_protein|XP_748079.1	DTO10_FUN_003025-T1	94.7	226	12	0	1	226	1	226	3.83e-155	428	100	226	226	DTO10	BGC0001990	DTO10_FUN_003025	220491_1	3531152	3532211	scaffold_2	-	21	7	present	present	verified	21	antiSMASH
BGC0001990|c1|3346-4834|+|AFUA_5G02640|O-methyltransferase,_putative|XP_748078.1	DTO10_FUN_003024-T1	95.1	431	21	0	1	431	1	431	4.6e-307	829	100	431	431	DTO10	BGC0001990	DTO10_FUN_003024	220490_1	3529344	3530826	scaffold_2	-	21	7	present	present	verified	21	antiSMASH
BGC0001990|c1|5098-5751|-|AFUA_5G02650|hypothetical_protein|XP_001481489.1	DTO10_FUN_003023-T1	82.4	176	11	1	1	156	1	176	1.31e-98	280	100	156	176	DTO10	BGC0001990	DTO10_FUN_003023	220489_1	3528430	3529083	scaffold_2	+	21	7	present	present	verified	21	antiSMASH
BGC0001990|c1|7911-8988|+|AFUA_5G02655|conserved_hypothetical_protein|XP_001481490.1	DTO10_FUN_003022-T1	91.5	318	27	0	1	318	1	318	2.53e-199	547	100	318	318	DTO10	BGC0001990	DTO10_FUN_003022	220488_1	3525231	3526307	scaffold_2	-	21	7	present	present	verified	21	antiSMASH
BGC0001990|c1|9515-11850|-|AFUA_5G02660|pyoverdine/dityrosine_biosynthesis_protein,_putative|XP_748076.2	DTO10_FUN_003021-T1	88.6	761	82	1	1	761	1	756	0	1337	100	761	756	DTO10	BGC0001990	DTO10_FUN_003021	220487_1	3522385	3524703	scaffold_2	+	21	7	present	present	verified	21	antiSMASH
BGC0001990|c1|12936-13646|-|AFUA_5G02670|ThiJ/PfpI_family_protein|XP_748075.1	DTO10_FUN_003020-T1	97	236	7	0	1	236	1	236	5.88e-164	451	100	236	236	DTO10	BGC0001990	DTO10_FUN_003020	220486_1	3520607	3521317	scaffold_2	+	21	7	present	present	verified	21	antiSMASH
BGC0001990|c1|131-1814|-|AFUA_5G02620|P450_family_sporulation-specific_N-formyltyrosine_oxidase_Dit2,_putative|XP_748080.1	DTO11_FUN_006379-T1	98.1	481	9	0	44	524	1	481	0	959	89.4	538	507	DTO11	BGC0001990	DTO11_FUN_006379	220492_1	748938	750575	scaffold_5	-	21	7	present	present	verified	21	antiSMASH
BGC0001990|c1|2040-2779|+|AFUA_5G02630|conserved_hypothetical_protein|XP_748079.1	DTO11_FUN_006380-T1	94.7	226	12	0	1	226	1	226	4.98e-155	428	100	226	234	DTO11	BGC0001990	DTO11_FUN_006380	220491_1	750922	751737	scaffold_5	+	21	7	present	present	verified	21	antiSMASH
BGC0001990|c1|3346-4834|+|AFUA_5G02640|O-methyltransferase,_putative|XP_748078.1	DTO11_FUN_006381-T1	95.1	431	21	0	1	431	1	431	1.56e-307	830	100	431	431	DTO11	BGC0001990	DTO11_FUN_006381	220490_1	752149	753690	scaffold_5	+	21	7	present	present	verified	21	antiSMASH
BGC0001990|c1|5098-5751|-|AFUA_5G02650|hypothetical_protein|XP_001481489.1	DTO11_FUN_006382-T1	82.4	176	11	1	1	156	1	176	1.28e-98	280	100	156	176	DTO11	BGC0001990	DTO11_FUN_006382	220489_1	753951	754602	scaffold_5	-	21	7	present	present	verified	21	antiSMASH
BGC0001990|c1|7911-8988|+|AFUA_5G02655|conserved_hypothetical_protein|XP_001481490.1	DTO11_FUN_006383-T1	91.5	318	27	0	1	318	1	318	2.46e-199	547	100	318	318	DTO11	BGC0001990	DTO11_FUN_006383	220488_1	756738	757814	scaffold_5	+	21	7	present	present	verified	21	antiSMASH
BGC0001990|c1|9515-11850|-|AFUA_5G02660|pyoverdine/dityrosine_biosynthesis_protein,_putative|XP_748076.2	DTO11_FUN_006384-T1	88.6	761	82	1	1	761	1	756	0	1337	100	761	756	DTO11	BGC0001990	DTO11_FUN_006384	220487_1	758339	760657	scaffold_5	-	21	7	present	present	verified	21	antiSMASH
BGC0001990|c1|12936-13646|-|AFUA_5G02670|ThiJ/PfpI_family_protein|XP_748075.1	DTO11_FUN_006385-T1	97	236	7	0	1	236	1	236	5.73e-164	451	100	236	236	DTO11	BGC0001990	DTO11_FUN_006385	220486_1	761725	762435	scaffold_5	-	21	7	present	present	verified	21	antiSMASH
BGC0001990|c1|131-1814|-|AFUA_5G02620|P450_family_sporulation-specific_N-formyltyrosine_oxidase_Dit2,_putative|XP_748080.1	DTO12_FUN_000256-T1	98.1	481	9	0	44	524	1	481	0	959	89.4	538	507	DTO12	BGC0001990	DTO12_FUN_000256	220492_1	675078	676715	scaffold_1	-	21	7	present	present	verified	21	antiSMASH
BGC0001990|c1|2040-2779|+|AFUA_5G02630|conserved_hypothetical_protein|XP_748079.1	DTO12_FUN_000257-T1	94.7	226	12	0	1	226	1	226	5.27e-155	428	100	226	234	DTO12	BGC0001990	DTO12_FUN_000257	220491_1	677062	677877	scaffold_1	+	21	7	present	present	verified	21	antiSMASH
BGC0001990|c1|3346-4834|+|AFUA_5G02640|O-methyltransferase,_putative|XP_748078.1	DTO12_FUN_000258-T1	95.1	431	21	0	1	431	1	431	1.65e-307	830	100	431	431	DTO12	BGC0001990	DTO12_FUN_000258	220490_1	678348	679830	scaffold_1	+	21	7	present	present	verified	21	antiSMASH
BGC0001990|c1|5098-5751|-|AFUA_5G02650|hypothetical_protein|XP_001481489.1	DTO12_FUN_000259-T1	96	100	4	0	1	100	1	100	1.83e-66	197	64.1	156	133	DTO12	BGC0001990	DTO12_FUN_000259	220489_1	679955	680909	scaffold_1	-	21	7	present	present	verified	21	antiSMASH
BGC0001990|c1|7911-8988|+|AFUA_5G02655|conserved_hypothetical_protein|XP_001481490.1	DTO12_FUN_000260-T1	91.2	318	28	0	1	318	1	318	1.06e-198	546	100	318	318	DTO12	BGC0001990	DTO12_FUN_000260	220488_1	682879	683955	scaffold_1	+	21	7	present	present	verified	21	antiSMASH
BGC0001990|c1|9515-11850|-|AFUA_5G02660|pyoverdine/dityrosine_biosynthesis_protein,_putative|XP_748076.2	DTO12_FUN_000261-T1	88.4	761	83	1	1	761	1	756	0	1335	100	761	756	DTO12	BGC0001990	DTO12_FUN_000261	220487_1	684480	687306	scaffold_1	-	21	7	present	present	verified	21	antiSMASH
BGC0001990|c1|12936-13646|-|AFUA_5G02670|ThiJ/PfpI_family_protein|XP_748075.1	DTO12_FUN_000262-T1	97	236	7	0	1	236	1	236	6.06e-164	451	100	236	236	DTO12	BGC0001990	DTO12_FUN_000262	220486_1	687866	688576	scaffold_1	-	21	7	present	present	verified	21	antiSMASH
BGC0001990|c1|131-1814|-|AFUA_5G02620|P450_family_sporulation-specific_N-formyltyrosine_oxidase_Dit2,_putative|XP_748080.1	DTO13_FUN_005478-T1	98.1	481	9	0	44	524	1	481	0	959	89.4	538	507	DTO13	BGC0001990	DTO13_FUN_005478	220492_1	724655	726292	scaffold_4	-	21	7	present	present	verified	21	antiSMASH
BGC0001990|c1|2040-2779|+|AFUA_5G02630|conserved_hypothetical_protein|XP_748079.1	DTO13_FUN_005479-T1	94.7	226	12	0	1	226	1	226	5.02e-155	428	100	226	234	DTO13	BGC0001990	DTO13_FUN_005479	220491_1	726639	727454	scaffold_4	+	21	7	present	present	verified	21	antiSMASH
BGC0001990|c1|3346-4834|+|AFUA_5G02640|O-methyltransferase,_putative|XP_748078.1	DTO13_FUN_005480-T1	95.1	431	21	0	1	431	1	431	1.58e-307	830	100	431	431	DTO13	BGC0001990	DTO13_FUN_005480	220490_1	727850	729433	scaffold_4	+	21	7	present	present	verified	21	antiSMASH
BGC0001990|c1|5098-5751|-|AFUA_5G02650|hypothetical_protein|XP_001481489.1	DTO13_FUN_005481-T1	82.4	176	11	1	1	156	1	176	1.29e-98	280	100	156	176	DTO13	BGC0001990	DTO13_FUN_005481	220489_1	729532	730557	scaffold_4	-	21	7	present	present	verified	21	antiSMASH
BGC0001990|c1|7911-8988|+|AFUA_5G02655|conserved_hypothetical_protein|XP_001481490.1	DTO13_FUN_005482-T1	91.5	318	27	0	1	318	1	318	2.48e-199	547	100	318	318	DTO13	BGC0001990	DTO13_FUN_005482	220488_1	732455	733531	scaffold_4	+	21	7	present	present	verified	21	antiSMASH
BGC0001990|c1|9515-11850|-|AFUA_5G02660|pyoverdine/dityrosine_biosynthesis_protein,_putative|XP_748076.2	DTO13_FUN_005483-T1	88.6	761	82	1	1	761	1	756	0	1337	100	761	756	DTO13	BGC0001990	DTO13_FUN_005483	220487_1	734056	736374	scaffold_4	-	21	7	present	present	verified	21	antiSMASH
BGC0001990|c1|12936-13646|-|AFUA_5G02670|ThiJ/PfpI_family_protein|XP_748075.1	DTO13_FUN_005484-T1	97	236	7	0	1	236	1	236	5.78e-164	451	100	236	236	DTO13	BGC0001990	DTO13_FUN_005484	220486_1	737442	738152	scaffold_4	-	21	7	present	present	verified	21	antiSMASH
BGC0001990|c1|131-1814|-|AFUA_5G02620|P450_family_sporulation-specific_N-formyltyrosine_oxidase_Dit2,_putative|XP_748080.1	DTO14_FUN_009935-T1	98.1	481	9	0	44	524	1	481	0	959	89.4	538	507	DTO14	BGC0001990	DTO14_FUN_009935	220492_1	736038	737675	scaffold_9	-	21	7	present	present	verified	21	antiSMASH
BGC0001990|c1|2040-2779|+|AFUA_5G02630|conserved_hypothetical_protein|XP_748079.1	DTO14_FUN_009936-T1	94.7	226	12	0	1	226	1	226	5.23e-155	428	100	226	234	DTO14	BGC0001990	DTO14_FUN_009936	220491_1	738022	738837	scaffold_9	+	21	7	present	present	verified	21	antiSMASH
BGC0001990|c1|3346-4834|+|AFUA_5G02640|O-methyltransferase,_putative|XP_748078.1	DTO14_FUN_009937-T1	95.1	431	21	0	1	431	1	431	1.64e-307	830	100	431	431	DTO14	BGC0001990	DTO14_FUN_009937	220490_1	739308	740790	scaffold_9	+	21	7	present	present	verified	21	antiSMASH
BGC0001990|c1|5098-5751|-|AFUA_5G02650|hypothetical_protein|XP_001481489.1	DTO14_FUN_009938-T1	82.4	176	11	1	1	156	1	176	1.34e-98	280	100	156	176	DTO14	BGC0001990	DTO14_FUN_009938	220489_1	741051	741702	scaffold_9	-	21	7	present	present	verified	21	antiSMASH
BGC0001990|c1|7911-8988|+|AFUA_5G02655|conserved_hypothetical_protein|XP_001481490.1	DTO14_FUN_009939-T1	91.5	318	27	0	1	318	1	318	2.59e-199	547	100	318	318	DTO14	BGC0001990	DTO14_FUN_009939	220488_1	743839	744915	scaffold_9	+	21	7	present	present	verified	21	antiSMASH
BGC0001990|c1|9515-11850|-|AFUA_5G02660|pyoverdine/dityrosine_biosynthesis_protein,_putative|XP_748076.2	DTO14_FUN_009940-T1	88.6	761	82	1	1	761	1	756	0	1337	100	761	756	DTO14	BGC0001990	DTO14_FUN_009940	220487_1	745239	748347	scaffold_9	-	21	7	present	present	verified	21	antiSMASH
BGC0001990|c1|12936-13646|-|AFUA_5G02670|ThiJ/PfpI_family_protein|XP_748075.1	DTO14_FUN_009941-T1	97	236	7	0	1	236	1	236	6.02e-164	451	100	236	236	DTO14	BGC0001990	DTO14_FUN_009941	220486_1	748826	749536	scaffold_9	-	21	7	present	present	verified	21	antiSMASH
BGC0001990|c1|131-1814|-|AFUA_5G02620|P450_family_sporulation-specific_N-formyltyrosine_oxidase_Dit2,_putative|XP_748080.1	DTO15_FUN_010397-T1	97.8	320	7	0	44	363	1	320	5.81e-231	637	59.5	538	336	DTO15	BGC0001990	DTO15_FUN_010397	220492_1	731369	732379	scaffold_10	-	21	7	present	present	verified	21	antiSMASH
BGC0001990|c1|131-1814|-|AFUA_5G02620|P450_family_sporulation-specific_N-formyltyrosine_oxidase_Dit2,_putative|XP_748080.1	DTO15_FUN_010396-T1	96.5	113	4	0	420	532	1	113	1.16e-76	236	21	538	131	DTO15	BGC0001990	DTO15_FUN_010396	220492_2	730789	731184	scaffold_10	-	21	7	present	present	verified	21	antiSMASH
BGC0001990|c1|2040-2779|+|AFUA_5G02630|conserved_hypothetical_protein|XP_748079.1	DTO15_FUN_010398-T1	94.7	226	12	0	1	226	1	226	3.9e-155	428	100	226	226	DTO15	BGC0001990	DTO15_FUN_010398	220491_1	732539	733662	scaffold_10	+	21	7	present	present	verified	21	antiSMASH
BGC0001990|c1|3346-4834|+|AFUA_5G02640|O-methyltransferase,_putative|XP_748078.1	DTO15_FUN_010399-T1	95.1	431	21	0	1	431	1	431	1.63e-307	830	100	431	431	DTO15	BGC0001990	DTO15_FUN_010399	220490_1	734012	735494	scaffold_10	+	21	7	present	present	verified	21	antiSMASH
BGC0001990|c1|5098-5751|-|AFUA_5G02650|hypothetical_protein|XP_001481489.1	DTO15_FUN_010400-T1	82.4	176	11	1	1	156	1	176	1.34e-98	280	100	156	176	DTO15	BGC0001990	DTO15_FUN_010400	220489_1	735755	736406	scaffold_10	-	21	7	present	present	verified	21	antiSMASH
BGC0001990|c1|7911-8988|+|AFUA_5G02655|conserved_hypothetical_protein|XP_001481490.1	DTO15_FUN_010401-T1	91.5	318	27	0	1	318	1	318	2.57e-199	547	100	318	318	DTO15	BGC0001990	DTO15_FUN_010401	220488_1	738543	739619	scaffold_10	+	21	7	present	present	verified	21	antiSMASH
BGC0001990|c1|9515-11850|-|AFUA_5G02660|pyoverdine/dityrosine_biosynthesis_protein,_putative|XP_748076.2	DTO15_FUN_010402-T1	88.6	761	82	1	1	761	1	756	0	1337	100	761	756	DTO15	BGC0001990	DTO15_FUN_010402	220487_1	740144	742462	scaffold_10	-	21	7	present	present	verified	21	antiSMASH
BGC0001990|c1|12936-13646|-|AFUA_5G02670|ThiJ/PfpI_family_protein|XP_748075.1	DTO15_FUN_010403-T1	97	236	7	0	1	236	1	236	5.98e-164	451	100	236	236	DTO15	BGC0001990	DTO15_FUN_010403	220486_1	743530	744240	scaffold_10	-	21	7	present	present	verified	21	antiSMASH
BGC0001990|c1|131-1814|-|AFUA_5G02620|P450_family_sporulation-specific_N-formyltyrosine_oxidase_Dit2,_putative|XP_748080.1	DTO16_FUN_003701-T1	98.1	481	9	0	44	524	1	481	0	959	89.4	538	507	DTO16	BGC0001990	DTO16_FUN_003701	220492_1	742070	743707	scaffold_3	-	21	7	present	present	verified	21	antiSMASH
BGC0001990|c1|2040-2779|+|AFUA_5G02630|conserved_hypothetical_protein|XP_748079.1	DTO16_FUN_003702-T1	94.7	226	12	0	1	226	1	226	5.02e-155	428	100	226	234	DTO16	BGC0001990	DTO16_FUN_003702	220491_1	744023	744908	scaffold_3	+	21	7	present	present	verified	21	antiSMASH
BGC0001990|c1|3346-4834|+|AFUA_5G02640|O-methyltransferase,_putative|XP_748078.1	DTO16_FUN_003703-T1	95.1	431	21	0	1	431	1	431	1.58e-307	830	100	431	431	DTO16	BGC0001990	DTO16_FUN_003703	220490_1	745340	746822	scaffold_3	+	21	7	present	present	verified	21	antiSMASH
BGC0001990|c1|5098-5751|-|AFUA_5G02650|hypothetical_protein|XP_001481489.1	DTO16_FUN_003704-T1	82.4	176	11	1	1	156	1	176	1.29e-98	280	100	156	176	DTO16	BGC0001990	DTO16_FUN_003704	220489_1	746947	747836	scaffold_3	-	21	7	present	present	verified	21	antiSMASH
BGC0001990|c1|7911-8988|+|AFUA_5G02655|conserved_hypothetical_protein|XP_001481490.1	DTO16_FUN_003705-T1	91.5	318	27	0	1	318	1	318	2.48e-199	547	100	318	318	DTO16	BGC0001990	DTO16_FUN_003705	220488_1	749870	750946	scaffold_3	+	21	7	present	present	verified	21	antiSMASH
BGC0001990|c1|9515-11850|-|AFUA_5G02660|pyoverdine/dityrosine_biosynthesis_protein,_putative|XP_748076.2	DTO16_FUN_003706-T1	88.6	761	82	1	1	761	1	756	0	1337	100	761	756	DTO16	BGC0001990	DTO16_FUN_003706	220487_1	751471	754062	scaffold_3	-	21	7	present	present	verified	21	antiSMASH
BGC0001990|c1|12936-13646|-|AFUA_5G02670|ThiJ/PfpI_family_protein|XP_748075.1	DTO16_FUN_003707-T1	97	236	7	0	1	236	1	236	5.77e-164	451	100	236	236	DTO16	BGC0001990	DTO16_FUN_003707	220486_1	754733	755708	scaffold_3	-	21	7	present	present	verified	21	antiSMASH
BGC0001990|c1|131-1814|-|AFUA_5G02620|P450_family_sporulation-specific_N-formyltyrosine_oxidase_Dit2,_putative|XP_748080.1	DTO1_FUN_004534-T1	98.1	481	9	0	44	524	1	481	0	959	89.4	538	507	DTO1	BGC0001990	DTO1_FUN_004534	220492_1	3369030	3370667	scaffold_3	+	21	7	present	present	verified	21	antiSMASH
BGC0001990|c1|2040-2779|+|AFUA_5G02630|conserved_hypothetical_protein|XP_748079.1	DTO1_FUN_004533-T1	94.7	226	12	0	1	226	1	226	3.9e-155	428	100	226	226	DTO1	BGC0001990	DTO1_FUN_004533	220491_1	3367798	3368719	scaffold_3	-	21	7	present	present	verified	21	antiSMASH
BGC0001990|c1|3346-4834|+|AFUA_5G02640|O-methyltransferase,_putative|XP_748078.1	DTO1_FUN_004532-T1	95.1	431	21	0	1	431	1	431	1.64e-307	830	100	431	431	DTO1	BGC0001990	DTO1_FUN_004532	220490_1	3365915	3367397	scaffold_3	-	21	7	present	present	verified	21	antiSMASH
BGC0001990|c1|5098-5751|-|AFUA_5G02650|hypothetical_protein|XP_001481489.1	DTO1_FUN_004531-T1	82.4	176	11	1	1	156	1	176	1.34e-98	280	100	156	176	DTO1	BGC0001990	DTO1_FUN_004531	220489_1	3365003	3365654	scaffold_3	+	21	7	present	present	verified	21	antiSMASH
BGC0001990|c1|7911-8988|+|AFUA_5G02655|conserved_hypothetical_protein|XP_001481490.1	DTO1_FUN_004530-T1	91.5	318	27	0	1	318	1	318	2.58e-199	547	100	318	318	DTO1	BGC0001990	DTO1_FUN_004530	220488_1	3361791	3362867	scaffold_3	-	21	7	present	present	verified	21	antiSMASH
BGC0001990|c1|9515-11850|-|AFUA_5G02660|pyoverdine/dityrosine_biosynthesis_protein,_putative|XP_748076.2	DTO1_FUN_004529-T1	88.6	761	82	1	1	761	1	756	0	1337	100	761	756	DTO1	BGC0001990	DTO1_FUN_004529	220487_1	3358722	3361266	scaffold_3	+	21	7	present	present	verified	21	antiSMASH
BGC0001990|c1|12936-13646|-|AFUA_5G02670|ThiJ/PfpI_family_protein|XP_748075.1	DTO1_FUN_004528-T1	97	236	7	0	1	236	1	236	5.99e-164	451	100	236	236	DTO1	BGC0001990	DTO1_FUN_004528	220486_1	3357170	3357880	scaffold_3	+	21	7	present	present	verified	21	antiSMASH
BGC0001990|c1|131-1814|-|AFUA_5G02620|P450_family_sporulation-specific_N-formyltyrosine_oxidase_Dit2,_putative|XP_748080.1	DTO2_FUN_006478-T1	97.9	481	10	0	44	524	1	481	0	956	89.4	538	507	DTO2	BGC0001990	DTO2_FUN_006478	220492_1	3412418	3414168	scaffold_4	+	21	7	present	present	verified	21	antiSMASH
BGC0001990|c1|2040-2779|+|AFUA_5G02630|conserved_hypothetical_protein|XP_748079.1	DTO2_FUN_006477-T1	94.7	226	12	0	1	226	1	226	5e-155	428	100	226	234	DTO2	BGC0001990	DTO2_FUN_006477	220491_1	3411368	3412238	scaffold_4	-	21	7	present	present	verified	21	antiSMASH
BGC0001990|c1|3346-4834|+|AFUA_5G02640|O-methyltransferase,_putative|XP_748078.1	DTO2_FUN_006476-T1	95.1	431	21	0	1	431	1	431	1.57e-307	830	100	431	431	DTO2	BGC0001990	DTO2_FUN_006476	220490_1	3409415	3410897	scaffold_4	-	21	7	present	present	verified	21	antiSMASH
BGC0001990|c1|5098-5751|-|AFUA_5G02650|hypothetical_protein|XP_001481489.1	DTO2_FUN_006475-T1	82.4	176	11	1	1	156	1	176	1.28e-98	280	100	156	176	DTO2	BGC0001990	DTO2_FUN_006475	220489_1	3408401	3409290	scaffold_4	+	21	7	present	present	verified	21	antiSMASH
BGC0001990|c1|7911-8988|+|AFUA_5G02655|conserved_hypothetical_protein|XP_001481490.1	DTO2_FUN_006474-T1	91.5	318	27	0	1	318	1	318	2.47e-199	547	100	318	318	DTO2	BGC0001990	DTO2_FUN_006474	220488_1	3405291	3406367	scaffold_4	-	21	7	present	present	verified	21	antiSMASH
BGC0001990|c1|9515-11850|-|AFUA_5G02660|pyoverdine/dityrosine_biosynthesis_protein,_putative|XP_748076.2	DTO2_FUN_006473-T1	88.6	761	82	1	1	761	1	756	0	1337	100	761	756	DTO2	BGC0001990	DTO2_FUN_006473	220487_1	3402334	3404766	scaffold_4	+	21	7	present	present	verified	21	antiSMASH
BGC0001990|c1|12936-13646|-|AFUA_5G02670|ThiJ/PfpI_family_protein|XP_748075.1	DTO2_FUN_006472-T1	97	236	7	0	1	236	1	236	5.75e-164	451	100	236	236	DTO2	BGC0001990	DTO2_FUN_006472	220486_1	3398969	3401544	scaffold_4	+	21	7	present	present	verified	21	antiSMASH
BGC0001990|c1|131-1814|-|AFUA_5G02620|P450_family_sporulation-specific_N-formyltyrosine_oxidase_Dit2,_putative|XP_748080.1	DTO3_FUN_005315-T1	98.1	481	9	0	44	524	1	481	0	959	89.4	538	507	DTO3	BGC0001990	DTO3_FUN_005315	220492_1	770153	771790	scaffold_4	-	21	7	present	present	verified	21	antiSMASH
BGC0001990|c1|2040-2779|+|AFUA_5G02630|conserved_hypothetical_protein|XP_748079.1	DTO3_FUN_005316-T1	94.2	226	13	0	1	226	1	226	5.87e-154	425	100	226	234	DTO3	BGC0001990	DTO3_FUN_005316	220491_1	772137	772952	scaffold_4	+	21	7	present	present	verified	21	antiSMASH
BGC0001990|c1|3346-4834|+|AFUA_5G02640|O-methyltransferase,_putative|XP_748078.1	DTO3_FUN_005317-T1	95.1	431	21	0	1	431	1	431	1.58e-307	830	100	431	431	DTO3	BGC0001990	DTO3_FUN_005317	220490_1	773391	774905	scaffold_4	+	21	7	present	present	verified	21	antiSMASH
BGC0001990|c1|5098-5751|-|AFUA_5G02650|hypothetical_protein|XP_001481489.1	DTO3_FUN_005318-T1	82.4	176	11	1	1	156	1	176	1.29e-98	280	100	156	176	DTO3	BGC0001990	DTO3_FUN_005318	220489_1	775166	775817	scaffold_4	-	21	7	present	present	verified	21	antiSMASH
BGC0001990|c1|7911-8988|+|AFUA_5G02655|conserved_hypothetical_protein|XP_001481490.1	DTO3_FUN_005319-T1	91.5	318	27	0	1	318	1	318	2.49e-199	547	100	318	318	DTO3	BGC0001990	DTO3_FUN_005319	220488_1	777954	779030	scaffold_4	+	21	7	present	present	verified	21	antiSMASH
BGC0001990|c1|9515-11850|-|AFUA_5G02660|pyoverdine/dityrosine_biosynthesis_protein,_putative|XP_748076.2	DTO3_FUN_005320-T1	88.4	761	83	1	1	761	1	756	0	1335	100	761	756	DTO3	BGC0001990	DTO3_FUN_005320	220487_1	779555	781873	scaffold_4	-	21	7	present	present	verified	21	antiSMASH
BGC0001990|c1|12936-13646|-|AFUA_5G02670|ThiJ/PfpI_family_protein|XP_748075.1	DTO3_FUN_005321-T1	97	236	7	0	1	236	1	236	5.78e-164	451	100	236	236	DTO3	BGC0001990	DTO3_FUN_005321	220486_1	782941	783651	scaffold_4	-	21	7	present	present	verified	21	antiSMASH
BGC0001990|c1|131-1814|-|AFUA_5G02620|P450_family_sporulation-specific_N-formyltyrosine_oxidase_Dit2,_putative|XP_748080.1	DTO4_FUN_005327-T1	98.1	481	9	0	44	524	1	481	0	959	89.4	538	507	DTO4	BGC0001990	DTO4_FUN_005327	220492_1	772349	773986	scaffold_4	-	21	7	present	present	verified	21	antiSMASH
BGC0001990|c1|2040-2779|+|AFUA_5G02630|conserved_hypothetical_protein|XP_748079.1	DTO4_FUN_005328-T1	94.2	226	13	0	1	226	1	226	5.92e-154	425	100	226	234	DTO4	BGC0001990	DTO4_FUN_005328	220491_1	774333	775148	scaffold_4	+	21	7	present	present	verified	21	antiSMASH
BGC0001990|c1|3346-4834|+|AFUA_5G02640|O-methyltransferase,_putative|XP_748078.1	DTO4_FUN_005329-T1	95.1	431	21	0	1	431	1	431	1.59e-307	830	100	431	431	DTO4	BGC0001990	DTO4_FUN_005329	220490_1	775616	777101	scaffold_4	+	21	7	present	present	verified	21	antiSMASH
BGC0001990|c1|5098-5751|-|AFUA_5G02650|hypothetical_protein|XP_001481489.1	DTO4_FUN_005330-T1	82.4	176	11	1	1	156	1	176	1.3e-98	280	100	156	176	DTO4	BGC0001990	DTO4_FUN_005330	220489_1	777226	778274	scaffold_4	-	21	7	present	present	verified	21	antiSMASH
BGC0001990|c1|7911-8988|+|AFUA_5G02655|conserved_hypothetical_protein|XP_001481490.1	DTO4_FUN_005331-T1	91.5	318	27	0	1	318	1	318	2.51e-199	547	100	318	318	DTO4	BGC0001990	DTO4_FUN_005331	220488_1	779914	782206	scaffold_4	+	21	7	present	present	verified	21	antiSMASH
BGC0001990|c1|9515-11850|-|AFUA_5G02660|pyoverdine/dityrosine_biosynthesis_protein,_putative|XP_748076.2	DTO4_FUN_005332-T1	88.4	761	83	1	1	761	1	756	0	1335	100	761	756	DTO4	BGC0001990	DTO4_FUN_005332	220487_1	781546	784069	scaffold_4	-	21	7	present	present	verified	21	antiSMASH
BGC0001990|c1|12936-13646|-|AFUA_5G02670|ThiJ/PfpI_family_protein|XP_748075.1	DTO4_FUN_005333-T1	97	236	7	0	1	236	1	236	5.83e-164	451	100	236	236	DTO4	BGC0001990	DTO4_FUN_005333	220486_1	785011	785995	scaffold_4	-	21	7	present	present	verified	21	antiSMASH
BGC0001990|c1|131-1814|-|AFUA_5G02620|P450_family_sporulation-specific_N-formyltyrosine_oxidase_Dit2,_putative|XP_748080.1	DTO5_FUN_005313-T1	98.1	481	9	0	44	524	1	481	0	959	89.4	538	507	DTO5	BGC0001990	DTO5_FUN_005313	220492_1	770655	772292	scaffold_4	-	21	7	present	present	verified	21	antiSMASH
BGC0001990|c1|2040-2779|+|AFUA_5G02630|conserved_hypothetical_protein|XP_748079.1	DTO5_FUN_005314-T1	94.2	226	13	0	1	226	1	226	4.4e-154	425	100	226	226	DTO5	BGC0001990	DTO5_FUN_005314	220491_1	772631	773475	scaffold_4	+	21	7	present	present	verified	21	antiSMASH
BGC0001990|c1|3346-4834|+|AFUA_5G02640|O-methyltransferase,_putative|XP_748078.1	DTO5_FUN_005315-T1	95.1	431	21	0	1	431	1	431	1.58e-307	830	100	431	431	DTO5	BGC0001990	DTO5_FUN_005315	220490_1	773875	775407	scaffold_4	+	21	7	present	present	verified	21	antiSMASH
BGC0001990|c1|5098-5751|-|AFUA_5G02650|hypothetical_protein|XP_001481489.1	DTO5_FUN_005316-T1	82.4	176	11	1	1	156	1	176	1.29e-98	280	100	156	176	DTO5	BGC0001990	DTO5_FUN_005316	220489_1	775532	776590	scaffold_4	-	21	7	present	present	verified	21	antiSMASH
BGC0001990|c1|7911-8988|+|AFUA_5G02655|conserved_hypothetical_protein|XP_001481490.1	DTO5_FUN_005317-T1	91.5	318	27	0	1	318	1	318	2.49e-199	547	100	318	318	DTO5	BGC0001990	DTO5_FUN_005317	220488_1	778456	779532	scaffold_4	+	21	7	present	present	verified	21	antiSMASH
BGC0001990|c1|9515-11850|-|AFUA_5G02660|pyoverdine/dityrosine_biosynthesis_protein,_putative|XP_748076.2	DTO5_FUN_005318-T1	88.4	761	83	1	1	761	1	756	0	1335	100	761	756	DTO5	BGC0001990	DTO5_FUN_005318	220487_1	780057	782840	scaffold_4	-	21	7	present	present	verified	21	antiSMASH
BGC0001990|c1|12936-13646|-|AFUA_5G02670|ThiJ/PfpI_family_protein|XP_748075.1	DTO5_FUN_005319-T1	97	236	7	0	1	236	1	236	5.78e-164	451	100	236	236	DTO5	BGC0001990	DTO5_FUN_005319	220486_1	783443	784153	scaffold_4	-	21	7	present	present	verified	21	antiSMASH
BGC0001990|c1|131-1814|-|AFUA_5G02620|P450_family_sporulation-specific_N-formyltyrosine_oxidase_Dit2,_putative|XP_748080.1	DTO6_FUN_006365-T1	98.1	481	9	0	44	524	1	481	0	959	89.4	538	507	DTO6	BGC0001990	DTO6_FUN_006365	220492_1	3373460	3375097	scaffold_4	+	21	7	present	present	verified	21	antiSMASH
BGC0001990|c1|2040-2779|+|AFUA_5G02630|conserved_hypothetical_protein|XP_748079.1	DTO6_FUN_006364-T1	94.2	226	13	0	1	226	1	226	5.92e-154	425	100	226	234	DTO6	BGC0001990	DTO6_FUN_006364	220491_1	3372298	3373113	scaffold_4	-	21	7	present	present	verified	21	antiSMASH
BGC0001990|c1|3346-4834|+|AFUA_5G02640|O-methyltransferase,_putative|XP_748078.1	DTO6_FUN_006363-T1	95.1	431	21	0	1	431	1	431	1.59e-307	830	100	431	431	DTO6	BGC0001990	DTO6_FUN_006363	220490_1	3370345	3371827	scaffold_4	-	21	7	present	present	verified	21	antiSMASH
BGC0001990|c1|5098-5751|-|AFUA_5G02650|hypothetical_protein|XP_001481489.1	DTO6_FUN_006362-T1	82.4	176	11	1	1	156	1	176	1.3e-98	280	100	156	176	DTO6	BGC0001990	DTO6_FUN_006362	220489_1	3369433	3370084	scaffold_4	+	21	7	present	present	verified	21	antiSMASH
BGC0001990|c1|7911-8988|+|AFUA_5G02655|conserved_hypothetical_protein|XP_001481490.1	DTO6_FUN_006361-T1	91.5	318	27	0	1	318	1	318	2.51e-199	547	100	318	318	DTO6	BGC0001990	DTO6_FUN_006361	220488_1	3366220	3367296	scaffold_4	-	21	7	present	present	verified	21	antiSMASH
BGC0001990|c1|9515-11850|-|AFUA_5G02660|pyoverdine/dityrosine_biosynthesis_protein,_putative|XP_748076.2	DTO6_FUN_006360-T1	88.4	761	83	1	1	761	1	756	0	1335	100	761	756	DTO6	BGC0001990	DTO6_FUN_006360	220487_1	3363086	3365829	scaffold_4	+	21	7	present	present	verified	21	antiSMASH
BGC0001990|c1|12936-13646|-|AFUA_5G02670|ThiJ/PfpI_family_protein|XP_748075.1	DTO6_FUN_006359-T1	97	236	7	0	1	236	1	236	5.83e-164	451	100	236	236	DTO6	BGC0001990	DTO6_FUN_006359	220486_1	3361599	3362309	scaffold_4	+	21	7	present	present	verified	21	antiSMASH
BGC0001990|c1|131-1814|-|AFUA_5G02620|P450_family_sporulation-specific_N-formyltyrosine_oxidase_Dit2,_putative|XP_748080.1	DTO7_FUN_006496-T1	98.1	481	9	0	44	524	1	481	0	959	89.4	538	507	DTO7	BGC0001990	DTO7_FUN_006496	220492_1	3382013	3383650	scaffold_4	+	21	7	present	present	verified	21	antiSMASH
BGC0001990|c1|2040-2779|+|AFUA_5G02630|conserved_hypothetical_protein|XP_748079.1	DTO7_FUN_006495-T1	94.7	226	12	0	1	226	1	226	5.05e-155	428	100	226	234	DTO7	BGC0001990	DTO7_FUN_006495	220491_1	3380552	3381666	scaffold_4	-	21	7	present	present	verified	21	antiSMASH
BGC0001990|c1|3346-4834|+|AFUA_5G02640|O-methyltransferase,_putative|XP_748078.1	DTO7_FUN_006494-T1	95.1	431	21	0	1	431	1	431	4.55e-307	829	100	431	431	DTO7	BGC0001990	DTO7_FUN_006494	220490_1	3378745	3380413	scaffold_4	-	21	7	present	present	verified	21	antiSMASH
BGC0001990|c1|5098-5751|-|AFUA_5G02650|hypothetical_protein|XP_001481489.1	DTO7_FUN_006493-T1	81.8	176	12	1	1	156	1	176	4.34e-97	276	100	156	176	DTO7	BGC0001990	DTO7_FUN_006493	220489_1	3377984	3378637	scaffold_4	+	21	7	present	present	verified	21	antiSMASH
BGC0001990|c1|7911-8988|+|AFUA_5G02655|conserved_hypothetical_protein|XP_001481490.1	DTO7_FUN_006492-T1	91.5	318	27	0	1	318	1	318	2.5e-199	547	100	318	318	DTO7	BGC0001990	DTO7_FUN_006492	220488_1	3374773	3375849	scaffold_4	-	21	7	present	present	verified	21	antiSMASH
BGC0001990|c1|9515-11850|-|AFUA_5G02660|pyoverdine/dityrosine_biosynthesis_protein,_putative|XP_748076.2	DTO7_FUN_006491-T1	88.6	761	82	1	1	761	1	756	0	1337	100	761	756	DTO7	BGC0001990	DTO7_FUN_006491	220487_1	3371930	3374248	scaffold_4	+	21	7	present	present	verified	21	antiSMASH
BGC0001990|c1|12936-13646|-|AFUA_5G02670|ThiJ/PfpI_family_protein|XP_748075.1	DTO7_FUN_006490-T1	97	236	7	0	1	236	1	236	5.81e-164	451	100	236	236	DTO7	BGC0001990	DTO7_FUN_006490	220486_1	3370152	3370862	scaffold_4	+	21	7	present	present	verified	21	antiSMASH
BGC0001990|c1|131-1814|-|AFUA_5G02620|P450_family_sporulation-specific_N-formyltyrosine_oxidase_Dit2,_putative|XP_748080.1	DTO8_FUN_003753-T1	98.3	481	8	0	44	524	1	481	0	961	89.4	538	507	DTO8	BGC0001990	DTO8_FUN_003753	220492_1	793319	794956	scaffold_3	-	21	7	present	present	verified	21	antiSMASH
BGC0001990|c1|2040-2779|+|AFUA_5G02630|conserved_hypothetical_protein|XP_748079.1	DTO8_FUN_003754-T1	94.7	226	12	0	1	226	1	226	3.97e-155	428	100	226	226	DTO8	BGC0001990	DTO8_FUN_003754	220491_1	795261	796206	scaffold_3	+	21	7	present	present	verified	21	antiSMASH
BGC0001990|c1|3346-4834|+|AFUA_5G02640|O-methyltransferase,_putative|XP_748078.1	DTO8_FUN_003755-T1	95.1	431	21	0	1	431	1	431	4.77e-307	829	100	431	431	DTO8	BGC0001990	DTO8_FUN_003755	220490_1	796589	798071	scaffold_3	+	21	7	present	present	verified	21	antiSMASH
BGC0001990|c1|5098-5751|-|AFUA_5G02650|hypothetical_protein|XP_001481489.1	DTO8_FUN_003756-T1	82.4	176	11	1	1	156	1	176	1.36e-98	280	100	156	176	DTO8	BGC0001990	DTO8_FUN_003756	220489_1	798332	798985	scaffold_3	-	21	7	present	present	verified	21	antiSMASH
BGC0001990|c1|7911-8988|+|AFUA_5G02655|conserved_hypothetical_protein|XP_001481490.1	DTO8_FUN_003757-T1	91.5	318	27	0	1	318	1	318	2.62e-199	547	100	318	318	DTO8	BGC0001990	DTO8_FUN_003757	220488_1	801108	802184	scaffold_3	+	21	7	present	present	verified	21	antiSMASH
BGC0001990|c1|9515-11850|-|AFUA_5G02660|pyoverdine/dityrosine_biosynthesis_protein,_putative|XP_748076.2	DTO8_FUN_003758-T1	88.6	761	82	1	1	761	1	756	0	1337	100	761	756	DTO8	BGC0001990	DTO8_FUN_003758	220487_1	802533	805723	scaffold_3	-	21	7	present	present	verified	21	antiSMASH
BGC0001990|c1|12936-13646|-|AFUA_5G02670|ThiJ/PfpI_family_protein|XP_748075.1	DTO8_FUN_003759-T1	97	236	7	0	1	236	1	236	6.1e-164	451	100	236	236	DTO8	BGC0001990	DTO8_FUN_003759	220486_1	806098	806808	scaffold_3	-	21	7	present	present	verified	21	antiSMASH
BGC0001990|c1|131-1814|-|AFUA_5G02620|P450_family_sporulation-specific_N-formyltyrosine_oxidase_Dit2,_putative|XP_748080.1	DTO9_FUN_005546-T1	97.8	320	7	0	44	363	1	320	5.71e-231	637	59.5	538	336	DTO9	BGC0001990	DTO9_FUN_005546	220492_1	674616	675626	scaffold_4	-	21	7	present	present	verified	21	antiSMASH
BGC0001990|c1|131-1814|-|AFUA_5G02620|P450_family_sporulation-specific_N-formyltyrosine_oxidase_Dit2,_putative|XP_748080.1	DTO9_FUN_005545-T1	99	105	1	0	420	524	1	105	2.16e-73	228	19.5	538	131	DTO9	BGC0001990	DTO9_FUN_005545	220492_2	673989	674431	scaffold_4	-	21	7	present	present	verified	21	antiSMASH
BGC0001990|c1|2040-2779|+|AFUA_5G02630|conserved_hypothetical_protein|XP_748079.1	DTO9_FUN_005547-T1	94.7	226	12	0	1	226	1	226	3.83e-155	428	100	226	226	DTO9	BGC0001990	DTO9_FUN_005547	220491_1	675973	676709	scaffold_4	+	21	7	present	present	verified	21	antiSMASH
BGC0001990|c1|3346-4834|+|AFUA_5G02640|O-methyltransferase,_putative|XP_748078.1	DTO9_FUN_005548-T1	95.1	431	21	0	1	431	1	431	1.61e-307	830	100	431	431	DTO9	BGC0001990	DTO9_FUN_005548	220490_1	677259	678741	scaffold_4	+	21	7	present	present	verified	21	antiSMASH
BGC0001990|c1|5098-5751|-|AFUA_5G02650|hypothetical_protein|XP_001481489.1	DTO9_FUN_005549-T1	82.4	176	11	1	1	156	1	176	1.31e-98	280	100	156	176	DTO9	BGC0001990	DTO9_FUN_005549	220489_1	679002	679653	scaffold_4	-	21	7	present	present	verified	21	antiSMASH
BGC0001990|c1|7911-8988|+|AFUA_5G02655|conserved_hypothetical_protein|XP_001481490.1	DTO9_FUN_005550-T1	91.5	318	27	0	1	318	1	318	2.53e-199	547	100	318	318	DTO9	BGC0001990	DTO9_FUN_005550	220488_1	681790	682866	scaffold_4	+	21	7	present	present	verified	21	antiSMASH
BGC0001990|c1|9515-11850|-|AFUA_5G02660|pyoverdine/dityrosine_biosynthesis_protein,_putative|XP_748076.2	DTO9_FUN_005551-T1	88.4	761	83	1	1	761	1	756	0	1335	100	761	756	DTO9	BGC0001990	DTO9_FUN_005551	220487_1	683197	686091	scaffold_4	-	21	7	present	present	verified	21	antiSMASH
BGC0001990|c1|12936-13646|-|AFUA_5G02670|ThiJ/PfpI_family_protein|XP_748075.1	DTO9_FUN_005552-T1	97	236	7	0	1	236	1	236	5.88e-164	451	100	236	236	DTO9	BGC0001990	DTO9_FUN_005552	220486_1	686777	687487	scaffold_4	-	21	7	present	present	verified	21	antiSMASH
BGC0001475|c1|6-1879|+|ATEG_04415|dihydroxy-acid_dehydratase|XP_001213593.1	DTO11_FUN_006106-T1	98.2	598	11	0	1	598	1	598	0	1161	100	598	598	DTO11	BGC0001475	DTO11_FUN_006106	217531_1	34543	36602	scaffold_5	-	22	4	present	present	verified	22	antiSMASH
BGC0001475|c1|3157-4386|-|ATEG_04416|hypothetical_protein|XP_001213594.1	DTO11_FUN_006105-T1	93.6	409	26	0	1	409	1	409	6.48e-301	812	100	409	412	DTO11	BGC0001475	DTO11_FUN_006105	220772_1	32046	33284	scaffold_5	+	22	4	present	present	verified	22	antiSMASH
BGC0001475|c1|5487-7246|+|ATEG_04417|hypothetical_protein|XP_001213595.1	DTO11_FUN_006104-T1	93.6	512	33	0	1	512	1	512	0	954	100	512	512	DTO11	BGC0001475	DTO11_FUN_006104	220773_1	29501	31263	scaffold_5	-	22	4	present	present	verified	22	antiSMASH
BGC0001475|c1|7903-9618|+|ATEG_04418|hypothetical_protein|XP_001213596.1	DTO11_FUN_006103-T1	93.8	435	27	0	104	538	1	435	6.29e-306	831	80.9	538	435	DTO11	BGC0001475	DTO11_FUN_006103	220774_1	27127	28485	scaffold_5	-	22	4	present	present	verified	22	antiSMASH
BGC0001475|c1|6-1879|+|ATEG_04415|dihydroxy-acid_dehydratase|XP_001213593.1	DTO12_FUN_000011-T1	98	598	12	0	1	598	1	598	0	1160	100	598	598	DTO12	BGC0001475	DTO12_FUN_000011	217531_1	47380	49496	scaffold_1	-	22	4	present	present	verified	22	antiSMASH
BGC0001475|c1|3157-4386|-|ATEG_04416|hypothetical_protein|XP_001213594.1	DTO12_FUN_000010-T1	93.6	409	26	0	1	409	1	409	6.86e-301	812	100	409	412	DTO12	BGC0001475	DTO12_FUN_000010	220772_1	44731	46269	scaffold_1	+	22	4	present	present	verified	22	antiSMASH
BGC0001475|c1|5487-7246|+|ATEG_04417|hypothetical_protein|XP_001213595.1	DTO12_FUN_000009-T1	93.6	512	33	0	1	512	1	512	0	954	100	512	512	DTO12	BGC0001475	DTO12_FUN_000009	220773_1	42142	44205	scaffold_1	-	22	4	present	present	verified	22	antiSMASH
BGC0001475|c1|7903-9618|+|ATEG_04418|hypothetical_protein|XP_001213596.1	DTO12_FUN_000008-T1	93.1	539	36	1	1	538	1	539	0	1022	100	538	539	DTO12	BGC0001475	DTO12_FUN_000008	220774_1	39795	41808	scaffold_1	-	22	4	present	present	verified	22	antiSMASH
BGC0001475|c1|6-1879|+|ATEG_04415|dihydroxy-acid_dehydratase|XP_001213593.1	DTO13_FUN_005203-T1	98	598	12	0	1	598	58	655	0	1160	100	598	655	DTO13	BGC0001475	DTO13_FUN_005203	217531_1	18064	20174	scaffold_4	-	22	4	present	present	verified	22	antiSMASH
BGC0001475|c1|3157-4386|-|ATEG_04416|hypothetical_protein|XP_001213594.1	DTO13_FUN_005202-T1	93.9	409	25	0	1	409	1	409	2.28e-301	813	100	409	412	DTO13	BGC0001475	DTO13_FUN_005202	220772_1	15376	16948	scaffold_4	+	22	4	present	present	verified	22	antiSMASH
BGC0001475|c1|5487-7246|+|ATEG_04417|hypothetical_protein|XP_001213595.1	DTO13_FUN_005201-T1	93.6	512	33	0	1	512	1	512	0	954	100	512	512	DTO13	BGC0001475	DTO13_FUN_005201	220773_1	12770	14882	scaffold_4	-	22	4	present	present	verified	22	antiSMASH
BGC0001475|c1|7903-9618|+|ATEG_04418|hypothetical_protein|XP_001213596.1	DTO13_FUN_005200-T1	93.1	539	36	1	1	538	1	539	0	1022	100	538	539	DTO13	BGC0001475	DTO13_FUN_005200	220774_1	10465	12510	scaffold_4	-	22	4	present	present	verified	22	antiSMASH
BGC0001475|c1|6-1879|+|ATEG_04415|dihydroxy-acid_dehydratase|XP_001213593.1	DTO14_FUN_009665-T1	98.2	598	11	0	1	598	1	598	0	1161	100	598	598	DTO14	BGC0001475	DTO14_FUN_009665	217531_1	27752	29848	scaffold_9	-	22	4	present	present	verified	22	antiSMASH
BGC0001475|c1|3157-4386|-|ATEG_04416|hypothetical_protein|XP_001213594.1	DTO14_FUN_009664-T1	93.6	409	26	0	1	409	1	409	6.81e-301	812	100	409	412	DTO14	BGC0001475	DTO14_FUN_009664	220772_1	25011	26721	scaffold_9	+	22	4	present	present	verified	22	antiSMASH
BGC0001475|c1|5487-7246|+|ATEG_04417|hypothetical_protein|XP_001213595.1	DTO14_FUN_009663-T1	93.6	512	33	0	1	512	1	512	0	954	100	512	512	DTO14	BGC0001475	DTO14_FUN_009663	220773_1	22534	24563	scaffold_9	-	22	4	present	present	verified	22	antiSMASH
BGC0001475|c1|7903-9618|+|ATEG_04418|hypothetical_protein|XP_001213596.1	DTO14_FUN_009662-T1	93.1	539	36	1	1	538	1	539	0	1022	100	538	539	DTO14	BGC0001475	DTO14_FUN_009662	220774_1	20164	22284	scaffold_9	-	22	4	present	present	verified	22	antiSMASH
BGC0001475|c1|6-1879|+|ATEG_04415|dihydroxy-acid_dehydratase|XP_001213593.1	DTO15_FUN_010123-T1	98.2	598	11	0	1	598	58	655	0	1161	100	598	655	DTO15	BGC0001475	DTO15_FUN_010123	217531_1	22457	24575	scaffold_10	-	22	4	present	present	verified	22	antiSMASH
BGC0001475|c1|3157-4386|-|ATEG_04416|hypothetical_protein|XP_001213594.1	DTO15_FUN_010122-T1	93.6	409	26	0	1	409	1	409	6.77e-301	812	100	409	412	DTO15	BGC0001475	DTO15_FUN_010122	220772_1	19824	21530	scaffold_10	+	22	4	present	present	verified	22	antiSMASH
BGC0001475|c1|5487-7246|+|ATEG_04417|hypothetical_protein|XP_001213595.1	DTO15_FUN_010121-T1	93.6	512	33	0	1	512	1	512	0	954	100	512	512	DTO15	BGC0001475	DTO15_FUN_010121	220773_1	17189	19353	scaffold_10	-	22	4	present	present	verified	22	antiSMASH
BGC0001475|c1|7903-9618|+|ATEG_04418|hypothetical_protein|XP_001213596.1	DTO15_FUN_010120-T1	93.1	539	36	1	1	538	1	539	0	1022	100	538	539	DTO15	BGC0001475	DTO15_FUN_010120	220774_1	14867	16902	scaffold_10	-	22	4	present	present	verified	22	antiSMASH
BGC0001475|c1|6-1879|+|ATEG_04415|dihydroxy-acid_dehydratase|XP_001213593.1	DTO16_FUN_003434-T1	98	598	12	0	1	598	1	598	0	1160	100	598	598	DTO16	BGC0001475	DTO16_FUN_003434	217531_1	33521	35618	scaffold_3	-	22	4	present	present	verified	22	antiSMASH
BGC0001475|c1|3157-4386|-|ATEG_04416|hypothetical_protein|XP_001213594.1	DTO16_FUN_003433-T1	93.6	409	26	0	1	409	1	409	6.53e-301	812	100	409	412	DTO16	BGC0001475	DTO16_FUN_003433	220772_1	30868	32404	scaffold_3	+	22	4	present	present	verified	22	antiSMASH
BGC0001475|c1|5487-7246|+|ATEG_04417|hypothetical_protein|XP_001213595.1	DTO16_FUN_003432-T1	93.6	512	33	0	1	512	1	512	0	954	100	512	512	DTO16	BGC0001475	DTO16_FUN_003432	220773_1	28253	30436	scaffold_3	-	22	4	present	present	verified	22	antiSMASH
BGC0001475|c1|7903-9618|+|ATEG_04418|hypothetical_protein|XP_001213596.1	DTO16_FUN_003431-T1	92.9	539	37	1	1	538	1	539	0	1021	100	538	539	DTO16	BGC0001475	DTO16_FUN_003431	220774_1	25930	27959	scaffold_3	-	22	4	present	present	verified	22	antiSMASH
BGC0001475|c1|6-1879|+|ATEG_04415|dihydroxy-acid_dehydratase|XP_001213593.1	DTO1_FUN_004804-T1	98	598	12	0	1	598	1	598	0	1160	100	598	598	DTO1	BGC0001475	DTO1_FUN_004804	217531_1	4077070	4079175	scaffold_3	+	22	4	present	present	verified	22	antiSMASH
BGC0001475|c1|3157-4386|-|ATEG_04416|hypothetical_protein|XP_001213594.1	DTO1_FUN_004805-T1	93.6	409	26	0	1	409	1	409	6.79e-301	812	100	409	412	DTO1	BGC0001475	DTO1_FUN_004805	220772_1	4080412	4081650	scaffold_3	-	22	4	present	present	verified	22	antiSMASH
BGC0001475|c1|5487-7246|+|ATEG_04417|hypothetical_protein|XP_001213595.1	DTO1_FUN_004806-T1	93.6	512	33	0	1	512	1	512	0	954	100	512	512	DTO1	BGC0001475	DTO1_FUN_004806	220773_1	4082305	4084409	scaffold_3	+	22	4	present	present	verified	22	antiSMASH
BGC0001475|c1|7903-9618|+|ATEG_04418|hypothetical_protein|XP_001213596.1	DTO1_FUN_004807-T1	93.1	539	36	1	1	538	1	539	0	1022	100	538	539	DTO1	BGC0001475	DTO1_FUN_004807	220774_1	4084742	4086755	scaffold_3	+	22	4	present	present	verified	22	antiSMASH
BGC0001475|c1|6-1879|+|ATEG_04415|dihydroxy-acid_dehydratase|XP_001213593.1	DTO3_FUN_005047-T1	98.2	598	11	0	1	598	1	598	0	1161	100	598	598	DTO3	BGC0001475	DTO3_FUN_005047	217531_1	59877	61954	scaffold_4	-	22	4	present	present	verified	22	antiSMASH
BGC0001475|c1|3157-4386|-|ATEG_04416|hypothetical_protein|XP_001213594.1	DTO3_FUN_005046-T1	93.6	409	26	0	1	409	1	409	6.55e-301	812	100	409	412	DTO3	BGC0001475	DTO3_FUN_005046	220772_1	57346	58691	scaffold_4	+	22	4	present	present	verified	22	antiSMASH
BGC0001475|c1|5487-7246|+|ATEG_04417|hypothetical_protein|XP_001213595.1	DTO3_FUN_005045-T1	93.6	512	33	0	1	512	1	512	0	954	100	512	512	DTO3	BGC0001475	DTO3_FUN_005045	220773_1	54762	56687	scaffold_4	-	22	4	present	present	verified	22	antiSMASH
BGC0001475|c1|7903-9618|+|ATEG_04418|hypothetical_protein|XP_001213596.1	DTO3_FUN_005044-T1	93.1	539	36	1	1	538	1	539	0	1022	100	538	539	DTO3	BGC0001475	DTO3_FUN_005044	220774_1	52283	54299	scaffold_4	-	22	4	present	present	verified	22	antiSMASH
BGC0001475|c1|6-1879|+|ATEG_04415|dihydroxy-acid_dehydratase|XP_001213593.1	DTO4_FUN_005060-T1	98.2	598	11	0	1	598	1	598	0	1161	100	598	598	DTO4	BGC0001475	DTO4_FUN_005060	217531_1	62089	64110	scaffold_4	-	22	4	present	present	verified	22	antiSMASH
BGC0001475|c1|3157-4386|-|ATEG_04416|hypothetical_protein|XP_001213594.1	DTO4_FUN_005059-T1	93.6	409	26	0	1	409	1	409	6.61e-301	812	100	409	412	DTO4	BGC0001475	DTO4_FUN_005059	220772_1	59513	60957	scaffold_4	+	22	4	present	present	verified	22	antiSMASH
BGC0001475|c1|5487-7246|+|ATEG_04417|hypothetical_protein|XP_001213595.1	DTO4_FUN_005058-T1	93.6	512	33	0	1	512	1	512	0	954	100	512	512	DTO4	BGC0001475	DTO4_FUN_005058	220773_1	56786	58833	scaffold_4	-	22	4	present	present	verified	22	antiSMASH
BGC0001475|c1|7903-9618|+|ATEG_04418|hypothetical_protein|XP_001213596.1	DTO4_FUN_005057-T1	93.1	539	36	1	1	538	1	539	0	1022	100	538	539	DTO4	BGC0001475	DTO4_FUN_005057	220774_1	54488	56463	scaffold_4	-	22	4	present	present	verified	22	antiSMASH
BGC0001475|c1|6-1879|+|ATEG_04415|dihydroxy-acid_dehydratase|XP_001213593.1	DTO5_FUN_005044-T1	98.2	598	11	0	1	598	58	655	0	1161	100	598	655	DTO5	BGC0001475	DTO5_FUN_005044	217531_1	60373	62492	scaffold_4	-	22	4	present	present	verified	22	antiSMASH
BGC0001475|c1|3157-4386|-|ATEG_04416|hypothetical_protein|XP_001213594.1	DTO5_FUN_005043-T1	93.6	409	26	0	1	409	1	409	6.55e-301	812	100	409	412	DTO5	BGC0001475	DTO5_FUN_005043	220772_1	57727	59269	scaffold_4	+	22	4	present	present	verified	22	antiSMASH
BGC0001475|c1|5487-7246|+|ATEG_04417|hypothetical_protein|XP_001213595.1	DTO5_FUN_005042-T1	93.6	512	33	0	1	512	1	512	0	954	100	512	512	DTO5	BGC0001475	DTO5_FUN_005042	220773_1	55115	57185	scaffold_4	-	22	4	present	present	verified	22	antiSMASH
BGC0001475|c1|7903-9618|+|ATEG_04418|hypothetical_protein|XP_001213596.1	DTO5_FUN_005041-T1	93.1	539	36	1	1	538	1	539	0	1022	100	538	539	DTO5	BGC0001475	DTO5_FUN_005041	220774_1	52790	54806	scaffold_4	-	22	4	present	present	verified	22	antiSMASH
BGC0001475|c1|6-1879|+|ATEG_04415|dihydroxy-acid_dehydratase|XP_001213593.1	DTO6_FUN_006638-T1	98.2	598	11	0	1	598	1	598	0	1161	100	598	598	DTO6	BGC0001475	DTO6_FUN_006638	217531_1	4083268	4085395	scaffold_4	+	22	4	present	present	verified	22	antiSMASH
BGC0001475|c1|3157-4386|-|ATEG_04416|hypothetical_protein|XP_001213594.1	DTO6_FUN_006639-T1	93.6	409	26	0	1	409	1	409	6.6e-301	812	100	409	412	DTO6	BGC0001475	DTO6_FUN_006639	220772_1	4086614	4087852	scaffold_4	-	22	4	present	present	verified	22	antiSMASH
BGC0001475|c1|5487-7246|+|ATEG_04417|hypothetical_protein|XP_001213595.1	DTO6_FUN_006640-T1	93.6	512	33	0	1	512	1	512	0	954	100	512	512	DTO6	BGC0001475	DTO6_FUN_006640	220773_1	4088505	4090639	scaffold_4	+	22	4	present	present	verified	22	antiSMASH
BGC0001475|c1|7903-9618|+|ATEG_04418|hypothetical_protein|XP_001213596.1	DTO6_FUN_006641-T1	93.1	539	36	1	1	538	1	539	0	1022	100	538	539	DTO6	BGC0001475	DTO6_FUN_006641	220774_1	4090944	4092961	scaffold_4	+	22	4	present	present	verified	22	antiSMASH
BGC0001475|c1|6-1879|+|ATEG_04415|dihydroxy-acid_dehydratase|XP_001213593.1	DTO7_FUN_006742-T1	98.2	598	11	0	1	598	58	655	0	1163	100	598	655	DTO7	BGC0001475	DTO7_FUN_006742	217531_1	4011517	4013638	scaffold_4	+	22	4	present	present	verified	22	antiSMASH
BGC0001475|c1|3157-4386|-|ATEG_04416|hypothetical_protein|XP_001213594.1	DTO7_FUN_006743-T1	93.9	409	25	0	1	409	1	409	2.3e-301	813	100	409	412	DTO7	BGC0001475	DTO7_FUN_006743	220772_1	4014875	4016113	scaffold_4	-	22	4	present	present	verified	22	antiSMASH
BGC0001475|c1|5487-7246|+|ATEG_04417|hypothetical_protein|XP_001213595.1	DTO7_FUN_006744-T1	93.4	512	34	0	1	512	1	512	0	954	100	512	512	DTO7	BGC0001475	DTO7_FUN_006744	220773_1	4016766	4018920	scaffold_4	+	22	4	present	present	verified	22	antiSMASH
BGC0001475|c1|7903-9618|+|ATEG_04418|hypothetical_protein|XP_001213596.1	DTO7_FUN_006745-T1	92.8	539	38	1	1	538	1	539	0	1017	100	538	539	DTO7	BGC0001475	DTO7_FUN_006745	220774_1	4019205	4021218	scaffold_4	+	22	4	present	present	verified	22	antiSMASH
BGC0001475|c1|6-1879|+|ATEG_04415|dihydroxy-acid_dehydratase|XP_001213593.1	DTO9_FUN_005305-T1	98	598	12	0	1	598	1	598	0	1160	100	598	598	DTO9	BGC0001475	DTO9_FUN_005305	217531_1	51696	53792	scaffold_4	-	22	4	present	present	verified	22	antiSMASH
BGC0001475|c1|3157-4386|-|ATEG_04416|hypothetical_protein|XP_001213594.1	DTO9_FUN_005304-T1	93.6	409	26	0	1	409	1	409	6.66e-301	812	100	409	412	DTO9	BGC0001475	DTO9_FUN_005304	220772_1	49046	50589	scaffold_4	+	22	4	present	present	verified	22	antiSMASH
BGC0001475|c1|5487-7246|+|ATEG_04417|hypothetical_protein|XP_001213595.1	DTO9_FUN_005303-T1	93.8	400	25	0	1	400	1	400	2.76e-272	744	78.1	512	414	DTO9	BGC0001475	DTO9_FUN_005303	220773_1	46435	48470	scaffold_4	-	22	4	present	present	verified	22	antiSMASH
BGC0001475|c1|7903-9618|+|ATEG_04418|hypothetical_protein|XP_001213596.1	DTO9_FUN_005302-T1	93.1	539	36	1	1	538	1	539	0	1022	100	538	539	DTO9	BGC0001475	DTO9_FUN_005302	220774_1	44093	46091	scaffold_4	-	22	4	present	present	verified	22	antiSMASH
BGC0000667|c1|2664-3792|-|PROQFM164_S02g001465|Aristolochene_synthase|CDM31315.1	DTO14_FUN_010913-T1	63	189	68	1	153	341	1	187	2.67e-75	229	55.3	342	196	DTO14	BGC0000667	DTO14_FUN_010913	230504_1	421709	422358	scaffold_12	-	52	4	present	putative	verified	22	antiSMASH
BGC0000667|c1|4715-6430|+|PROQFM164_S02g001466|FAD-binding,_type_2|CDM31316.1	DTO14_FUN_010908-T1	43.1	432	239	5	59	490	20	444	3.15e-110	334	84.4	512	469	DTO14	BGC0000667	DTO14_FUN_010908	230498_1	411857	413553	scaffold_12	-	52	4	present	putative	verified	22	antiSMASH
BGC0000667|c1|6950-7939|-|PROQFM164_S02g001467|Short-chain_dehydrogenase/reductase_SDR|CDM31317.1	DTO14_FUN_010915-T1	50.3	310	141	5	33	329	1	310	2.38e-91	274	90.3	329	324	DTO14	BGC0000667	DTO14_FUN_010915	230506_1	424698	425901	scaffold_12	-	52	4	present	putative	verified	22	antiSMASH
BGC0000667|c1|2664-3792|-|PROQFM164_S02g001465|Aristolochene_synthase|CDM31315.1	DTO15_FUN_009166-T1	63	189	68	1	153	341	1	187	2.66e-75	229	55.3	342	196	DTO15	BGC0000667	DTO15_FUN_009166	230504_1	536538	537187	scaffold_8	-	52	4	present	putative	verified	22	antiSMASH
BGC0000667|c1|4715-6430|+|PROQFM164_S02g001466|FAD-binding,_type_2|CDM31316.1	DTO15_FUN_009161-T1	43.1	432	239	5	59	490	20	444	3.13e-110	334	84.4	512	469	DTO15	BGC0000667	DTO15_FUN_009161	230498_1	526368	528382	scaffold_8	-	52	4	present	putative	verified	22	antiSMASH
BGC0000667|c1|6950-7939|-|PROQFM164_S02g001467|Short-chain_dehydrogenase/reductase_SDR|CDM31317.1	DTO15_FUN_009168-T1	50.3	310	141	5	33	329	1	310	2.37e-91	274	90.3	329	324	DTO15	BGC0000667	DTO15_FUN_009168	230506_1	539431	540728	scaffold_8	-	52	4	present	putative	verified	22	antiSMASH
BGC0002093|c1|8376-20470|-|QBQ83704.1|polyketide_synthase-nonribosomal_peptide_synthetase|QBQ83704.1	DTO12_FUN_003765-T1	56.6	4117	1659	44	10	4012	3	4104	0	4470	99.7	4015	4105	DTO12	BGC0002093	DTO12_FUN_003765	227461_1	2848713	2861480	scaffold_3	+	62	8	present	putative	verified	22	antiSMASH
BGC0002093|c1|21712-23336|+|QBQ83705.1|ring_expansion_P450|QBQ83705.1	DTO12_FUN_003766-T1	65.9	501	165	3	6	504	13	509	2.1e-251	695	99	504	509	DTO12	BGC0002093	DTO12_FUN_003766	227462_1	2861849	2863511	scaffold_3	-	62	8	present	putative	verified	22	antiSMASH
BGC0002093|c1|28927-30159|-|QBQ83706.1|short-chain_dehydrogenase_TIC_32|QBQ83706.1	DTO12_FUN_003762-T1	44	364	172	8	4	365	6	339	1.38e-84	259	99.2	365	339	DTO12	BGC0002093	DTO12_FUN_003762	227459_1	2841192	2842275	scaffold_3	+	62	8	present	putative	verified	22	antiSMASH
BGC0002093|c1|30654-32208|+|QBQ83707.1|epimerase|QBQ83707.1	DTO12_FUN_003770-T1	49.3	410	198	4	1	409	20	420	1.17e-126	380	98.8	414	694	DTO12	BGC0002093	DTO12_FUN_003770	227465_1	2869786	2874930	scaffold_3	-	62	8	present	putative	verified	22	antiSMASH
BGC0002093|c1|33889-35550|+|QBQ83709.1|cytochrome_P450|QBQ83709.1	DTO12_FUN_003771-T1	50	496	234	5	43	534	44	529	3.81e-164	475	91.8	536	529	DTO12	BGC0002093	DTO12_FUN_003771	227467_1	2872394	2874051	scaffold_3	+	62	8	present	putative	verified	22	antiSMASH
BGC0002093|c1|36132-37259|-|QBQ83710.1|trans-enoyl_reductase|QBQ83710.1	DTO12_FUN_003764-T1	64.2	366	125	2	6	371	8	367	3.56e-168	473	97.6	375	369	DTO12	BGC0002093	DTO12_FUN_003764	227460_1	2847142	2848251	scaffold_3	-	62	8	present	putative	verified	22	antiSMASH
BGC0002093|c1|38367-39745|+|QBQ83711.1|NADH-dependent_flavin_oxidoreductase|QBQ83711.1	DTO12_FUN_003770-T1	55.6	405	179	1	3	406	23	427	4.11e-165	478	99.5	406	694	DTO12	BGC0002093	DTO12_FUN_003770	227465_1	2869786	2874930	scaffold_3	-	62	8	present	putative	verified	22	antiSMASH
BGC0002093|c1|8376-20470|-|QBQ83704.1|polyketide_synthase-nonribosomal_peptide_synthetase|QBQ83704.1	DTO2_FUN_001643-T1	56.4	4117	1666	41	10	4012	3	4104	0	4469	99.7	4015	4105	DTO2	BGC0002093	DTO2_FUN_001643	227461_1	4714905	4727341	scaffold_1	+	62	8	present	putative	verified	22	antiSMASH
BGC0002093|c1|21712-23336|+|QBQ83705.1|ring_expansion_P450|QBQ83705.1	DTO2_FUN_001644-T1	66.1	501	164	3	6	504	13	509	2.44e-252	697	99	504	509	DTO2	BGC0002093	DTO2_FUN_001644	227462_1	4727814	4729476	scaffold_1	-	62	8	present	putative	verified	22	antiSMASH
BGC0002093|c1|28927-30159|-|QBQ83706.1|short-chain_dehydrogenase_TIC_32|QBQ83706.1	DTO2_FUN_001640-T1	43.4	364	174	7	4	365	6	339	2.09e-83	256	99.2	365	339	DTO2	BGC0002093	DTO2_FUN_001640	227459_1	4707834	4708917	scaffold_1	+	62	8	present	putative	verified	22	antiSMASH
BGC0002093|c1|30654-32208|+|QBQ83707.1|epimerase|QBQ83707.1	DTO2_FUN_001648-T1	49.3	410	198	4	1	409	20	420	1.11e-126	380	98.8	414	694	DTO2	BGC0002093	DTO2_FUN_001648	227465_1	4735762	4738055	scaffold_1	-	62	8	present	putative	verified	22	antiSMASH
BGC0002093|c1|33889-35550|+|QBQ83709.1|cytochrome_P450|QBQ83709.1	DTO2_FUN_001649-T1	50.2	460	221	4	79	534	37	492	1.39e-154	449	85.1	536	492	DTO2	BGC0002093	DTO2_FUN_001649	227467_1	4738347	4740086	scaffold_1	+	62	8	present	putative	verified	22	antiSMASH
BGC0002093|c1|36132-37259|-|QBQ83710.1|trans-enoyl_reductase|QBQ83710.1	DTO2_FUN_001642-T1	64.2	366	125	2	6	371	8	367	3.38e-168	473	97.6	375	369	DTO2	BGC0002093	DTO2_FUN_001642	227460_1	4713108	4714217	scaffold_1	-	62	8	present	putative	verified	22	antiSMASH
BGC0002093|c1|38367-39745|+|QBQ83711.1|NADH-dependent_flavin_oxidoreductase|QBQ83711.1	DTO2_FUN_001648-T1	55.6	405	179	1	3	406	23	427	3.89e-165	478	99.5	406	694	DTO2	BGC0002093	DTO2_FUN_001648	227465_1	4735762	4738055	scaffold_1	-	62	8	present	putative	verified	22	antiSMASH
BGC0001248|c1|1353-4192|+|ACF70484.1|oxidosqualene_clavarinone_cyclase|ACF70484.1	DTO10_FUN_005131-T1	46.5	710	367	5	16	716	7	712	1.91e-236	674	97.2	721	715	DTO10	BGC0001248	DTO10_FUN_005131	221721_1	820733	823273	scaffold_4	+	26	1	present	present	verified	26	antiSMASH
BGC0001248|c1|1353-4192|+|ACF70484.1|oxidosqualene_clavarinone_cyclase|ACF70484.1	DTO11_FUN_005775-T1	46.5	710	367	5	16	716	7	712	4.62e-237	675	97.2	721	715	DTO11	BGC0001248	DTO11_FUN_005775	221721_1	2640646	2643139	scaffold_4	-	26	1	present	present	verified	26	antiSMASH
BGC0001248|c1|1353-4192|+|ACF70484.1|oxidosqualene_clavarinone_cyclase|ACF70484.1	DTO12_FUN_001841-T1	46.5	710	367	5	16	716	7	712	4.89e-237	675	97.2	721	715	DTO12	BGC0001248	DTO12_FUN_001841	221721_1	785854	788313	scaffold_2	+	26	1	present	present	verified	26	antiSMASH
BGC0001248|c1|1353-4192|+|ACF70484.1|oxidosqualene_clavarinone_cyclase|ACF70484.1	DTO13_FUN_009098-T1	46.5	710	367	5	16	716	7	712	4.66e-237	675	97.2	721	715	DTO13	BGC0001248	DTO13_FUN_009098	221721_1	2567248	2569694	scaffold_6	-	26	1	present	present	verified	26	antiSMASH
BGC0001248|c1|1353-4192|+|ACF70484.1|oxidosqualene_clavarinone_cyclase|ACF70484.1	DTO14_FUN_005719-T1	46.5	710	367	5	16	716	7	712	4.85e-237	675	97.2	721	715	DTO14	BGC0001248	DTO14_FUN_005719	221721_1	2566382	2569042	scaffold_4	-	26	1	present	present	verified	26	antiSMASH
BGC0001248|c1|1353-4192|+|ACF70484.1|oxidosqualene_clavarinone_cyclase|ACF70484.1	DTO15_FUN_005748-T1	46.5	710	367	5	16	716	7	712	4.82e-237	675	97.2	721	715	DTO15	BGC0001248	DTO15_FUN_005748	221721_1	2573961	2576568	scaffold_4	-	26	1	present	present	verified	26	antiSMASH
BGC0001248|c1|1353-4192|+|ACF70484.1|oxidosqualene_clavarinone_cyclase|ACF70484.1	DTO16_FUN_008505-T1	46.5	710	367	5	16	716	7	712	4.65e-237	675	97.2	721	715	DTO16	BGC0001248	DTO16_FUN_008505	221721_1	2599651	2602198	scaffold_6	-	26	1	present	present	verified	26	antiSMASH
BGC0001248|c1|1353-4192|+|ACF70484.1|oxidosqualene_clavarinone_cyclase|ACF70484.1	DTO1_FUN_005744-T1	46.5	710	367	5	16	716	7	712	4.83e-237	675	97.2	721	715	DTO1	BGC0001248	DTO1_FUN_005744	221721_1	2574128	2576565	scaffold_4	-	26	1	present	present	verified	26	antiSMASH
BGC0001248|c1|1353-4192|+|ACF70484.1|oxidosqualene_clavarinone_cyclase|ACF70484.1	DTO2_FUN_008456-T1	46.5	710	367	5	16	716	7	712	4.63e-237	675	97.2	721	715	DTO2	BGC0001248	DTO2_FUN_008456	221721_1	782428	784848	scaffold_6	+	26	1	present	present	verified	26	antiSMASH
BGC0001248|c1|1353-4192|+|ACF70484.1|oxidosqualene_clavarinone_cyclase|ACF70484.1	DTO3_FUN_008941-T1	46.5	710	367	5	16	716	7	712	4.66e-237	675	97.2	721	715	DTO3	BGC0001248	DTO3_FUN_008941	221721_1	2677919	2680411	scaffold_6	-	26	1	present	present	verified	26	antiSMASH
BGC0001248|c1|1353-4192|+|ACF70484.1|oxidosqualene_clavarinone_cyclase|ACF70484.1	DTO4_FUN_008949-T1	46.5	710	367	5	16	716	7	712	4.7e-237	675	97.2	721	715	DTO4	BGC0001248	DTO4_FUN_008949	221721_1	2658793	2661209	scaffold_6	-	26	1	present	present	verified	26	antiSMASH
BGC0001248|c1|1353-4192|+|ACF70484.1|oxidosqualene_clavarinone_cyclase|ACF70484.1	DTO5_FUN_008955-T1	46.5	710	367	5	16	716	7	712	4.66e-237	675	97.2	721	715	DTO5	BGC0001248	DTO5_FUN_008955	221721_1	2669919	2672359	scaffold_6	-	26	1	present	present	verified	26	antiSMASH
BGC0001248|c1|1353-4192|+|ACF70484.1|oxidosqualene_clavarinone_cyclase|ACF70484.1	DTO6_FUN_009059-T1	46.5	710	367	5	16	716	7	712	4.7e-237	675	97.2	721	715	DTO6	BGC0001248	DTO6_FUN_009059	221721_1	2665710	2668175	scaffold_6	-	26	1	present	present	verified	26	antiSMASH
BGC0001248|c1|1353-4192|+|ACF70484.1|oxidosqualene_clavarinone_cyclase|ACF70484.1	DTO7_FUN_008981-T1	46.5	710	367	5	16	716	7	712	4.68e-237	675	97.2	721	715	DTO7	BGC0001248	DTO7_FUN_008981	221721_1	2597695	2600300	scaffold_6	-	26	1	present	present	verified	26	antiSMASH
BGC0001248|c1|1353-4192|+|ACF70484.1|oxidosqualene_clavarinone_cyclase|ACF70484.1	DTO8_FUN_007416-T1	46.5	710	367	5	16	716	7	712	1.98e-236	674	97.2	721	715	DTO8	BGC0001248	DTO8_FUN_007416	221721_1	2603676	2606324	scaffold_5	-	26	1	present	present	verified	26	antiSMASH
BGC0001248|c1|1353-4192|+|ACF70484.1|oxidosqualene_clavarinone_cyclase|ACF70484.1	DTO9_FUN_008582-T1	46.5	710	367	5	16	716	7	712	2.36e-237	676	97.2	721	715	DTO9	BGC0001248	DTO9_FUN_008582	221721_1	800047	802423	scaffold_6	+	26	1	present	present	verified	26	antiSMASH
BGC0001988|c1|6-579|+|P174DRAFT_442171|hypothetical_protein|PKX92291.1	DTO10_FUN_004839-T1	94	149	9	0	1	149	1	149	4.4e-101	285	99.3	150	150	DTO10	BGC0001988	DTO10_FUN_004839	222011_1	107338	107883	scaffold_4	+	63	19	present	present	verified	27	antiSMASH
BGC0001988|c1|863-1660|+|P174DRAFT_371720|hypothetical_protein|PKX92292.1	DTO10_FUN_004840-T1	95.5	265	12	0	1	265	1	265	1.29e-186	511	100	265	265	DTO10	BGC0001988	DTO10_FUN_004840	222010_1	108167	108964	scaffold_4	+	63	19	present	present	verified	27	antiSMASH
BGC0001988|c1|1863-2373|+|P174DRAFT_407796|hypothetical_protein|PKX92293.1	DTO10_FUN_004841-T1	95.4	151	7	0	1	151	1	151	1.94e-109	306	100	151	151	DTO10	BGC0001988	DTO10_FUN_004841	222009_1	109159	109669	scaffold_4	+	63	19	present	present	verified	27	antiSMASH
BGC0001988|c1|2781-4443|+|P174DRAFT_372675|putative_cytochrome_P450_oxidoreductase|PKX92294.1	DTO10_FUN_004842-T1	95.3	515	21	1	1	515	2	513	0	1019	100	515	513	DTO10	BGC0001988	DTO10_FUN_004842	222008_1	110071	111736	scaffold_4	+	63	19	present	present	verified	27	antiSMASH
BGC0001988|c1|4666-5538|-|P174DRAFT_421366|putative_NADP(+)-dependent_dehydrogenase|PKX92295.1	DTO10_FUN_004843-T1	95.2	290	14	0	1	290	1	290	2.31e-197	540	100	290	290	DTO10	BGC0001988	DTO10_FUN_004843	222007_1	111974	112846	scaffold_4	-	63	19	present	present	verified	27	antiSMASH
BGC0001988|c1|6102-7842|-|P174DRAFT_373375|MFS_general_substrate_transporter|PKX92296.1	DTO10_FUN_004844-T1	96.8	502	16	0	1	502	55	556	0	951	99.2	506	559	DTO10	BGC0001988	DTO10_FUN_004844	222006_1	113307	115284	scaffold_4	-	63	19	present	present	verified	27	antiSMASH
BGC0001988|c1|8248-10694|+|P174DRAFT_512928|putative_fungal-specific_transcription_factor|PKX92297.1	DTO10_FUN_004845-T1	91	669	42	1	66	716	36	704	0	1224	90.9	716	704	DTO10	BGC0001988	DTO10_FUN_004845	222005_1	115433	119300	scaffold_4	+	63	19	present	present	verified	27	antiSMASH
BGC0001988|c1|10719-12358|-|P174DRAFT_512929|hypothetical_protein|PKX92298.1	DTO10_FUN_004846-T1	96.1	484	19	0	1	484	1	484	0	939	99.4	487	484	DTO10	BGC0001988	DTO10_FUN_004846	222004_1	117993	119619	scaffold_4	-	63	19	present	present	verified	27	antiSMASH
BGC0001988|c1|12693-14356|+|P174DRAFT_460883|FAD_binding_domain_protein|PKX92299.1	DTO10_FUN_004847-T1	88.6	533	32	2	1	504	1	533	0	944	100	504	533	DTO10	BGC0001988	DTO10_FUN_004847	222003_1	119945	121608	scaffold_4	+	63	19	present	present	verified	27	antiSMASH
BGC0001988|c1|14663-15457|-|P174DRAFT_460884|putative_hydroxysteroid_dehydrogenase|PKX92300.1	DTO10_FUN_004848-T1	99.2	264	2	0	1	264	1	264	8.05e-185	506	100	264	264	DTO10	BGC0001988	DTO10_FUN_004848	222002_1	121924	122718	scaffold_4	-	63	19	present	present	verified	27	antiSMASH
BGC0001988|c1|15742-16344|+|P174DRAFT_451670|putative_scytalone_dehydratase|PKX92301.1	DTO10_FUN_004849-T1	96.9	162	5	0	1	162	1	162	1.33e-119	333	100	162	162	DTO10	BGC0001988	DTO10_FUN_004849	222001_1	122996	123598	scaffold_4	+	63	19	present	present	verified	27	antiSMASH
BGC0001988|c1|16568-18000|-|P174DRAFT_512932|hypothetical_protein|PKX92302.1	DTO10_FUN_004850-T1	95	444	9	2	1	444	43	473	1.67e-293	797	100	444	473	DTO10	BGC0001988	DTO10_FUN_004850	222000_1	123598	125477	scaffold_4	-	63	19	present	present	verified	27	antiSMASH
BGC0001988|c1|18802-19725|-|P174DRAFT_512933|S-adenosyl-L-methionine-dependent_methyltransferase|PKX92303.1	DTO10_FUN_004851-T1	77.3	309	22	3	1	261	1	309	1.73e-166	461	100	261	309	DTO10	BGC0001988	DTO10_FUN_004851	221999_1	126016	126945	scaffold_4	-	63	19	present	present	verified	27	antiSMASH
BGC0001988|c1|20092-21461|+|P174DRAFT_512934|hypothetical_protein|PKX92304.1	DTO10_FUN_004852-T1	88.6	456	29	1	1	433	1	456	2.77e-301	816	100	433	456	DTO10	BGC0001988	DTO10_FUN_004852	221998_1	127301	128683	scaffold_4	+	63	19	present	present	verified	27	antiSMASH
BGC0001988|c1|21655-22240|-|P174DRAFT_372388|hypothetical_protein|PKX92305.1	DTO10_FUN_004853-T1	98	151	3	0	1	151	1	151	1.21e-112	314	100	151	151	DTO10	BGC0001988	DTO10_FUN_004853	221997_1	128873	129435	scaffold_4	-	63	19	present	present	verified	27	antiSMASH
BGC0001988|c1|22456-23007|+|P174DRAFT_373009|DUF1772-domain-containing_protein|PKX92306.1	DTO10_FUN_004854-T1	90.7	162	15	0	1	162	1	162	4.79e-104	293	100	162	162	DTO10	BGC0001988	DTO10_FUN_004854	221996_1	129653	130203	scaffold_4	+	63	19	present	present	verified	27	antiSMASH
BGC0001988|c1|23258-24391|-|P174DRAFT_460891|metallo-beta-lactamase_superfamily_protein|PKX92307.1	DTO10_FUN_004855-T1	97.7	309	7	0	1	309	1	309	3.05e-223	608	96	322	314	DTO10	BGC0001988	DTO10_FUN_004855	221995_1	130568	131573	scaffold_4	-	63	19	present	present	verified	27	antiSMASH
BGC0001988|c1|24740-30462|+|P174DRAFT_487776|putative_polyketide_synthase|PKX92308.1	DTO10_FUN_004856-T1	94.7	1824	62	4	1	1792	1	1821	0	3383	100	1792	1821	DTO10	BGC0001988	DTO10_FUN_004856	221994_1	131909	137607	scaffold_4	+	63	19	present	present	verified	27	antiSMASH
BGC0001988|c1|31035-32171|-|P174DRAFT_372038|hypothetical_protein|PKX92309.1	DTO10_FUN_004857-T1	90.5	378	36	0	1	378	1	378	2.66e-238	651	100	378	378	DTO10	BGC0001988	DTO10_FUN_004857	221993_1	138073	139209	scaffold_4	-	63	19	present	present	verified	27	antiSMASH
BGC0001988|c1|6-579|+|P174DRAFT_442171|hypothetical_protein|PKX92291.1	DTO11_FUN_006065-T1	95.3	149	7	0	1	149	1	149	3.14e-103	290	99.3	150	150	DTO11	BGC0001988	DTO11_FUN_006065	222011_1	3341588	3342221	scaffold_4	-	63	19	present	present	verified	27	antiSMASH
BGC0001988|c1|863-1660|+|P174DRAFT_371720|hypothetical_protein|PKX92292.1	DTO11_FUN_006064-T1	95.8	265	11	0	1	265	1	265	3.75e-188	514	100	265	265	DTO11	BGC0001988	DTO11_FUN_006064	222010_1	3340508	3341305	scaffold_4	-	63	19	present	present	verified	27	antiSMASH
BGC0001988|c1|1863-2373|+|P174DRAFT_407796|hypothetical_protein|PKX92293.1	DTO11_FUN_006063-T1	96	151	6	0	1	151	1	151	1.33e-109	306	100	151	151	DTO11	BGC0001988	DTO11_FUN_006063	222009_1	3339723	3340405	scaffold_4	-	63	19	present	present	verified	27	antiSMASH
BGC0001988|c1|2781-4443|+|P174DRAFT_372675|putative_cytochrome_P450_oxidoreductase|PKX92294.1	DTO11_FUN_006062-T1	95.1	515	22	1	1	515	2	513	0	1017	100	515	513	DTO11	BGC0001988	DTO11_FUN_006062	222008_1	3337736	3339401	scaffold_4	-	63	19	present	present	verified	27	antiSMASH
BGC0001988|c1|4666-5538|-|P174DRAFT_421366|putative_NADP(+)-dependent_dehydrogenase|PKX92295.1	DTO11_FUN_006061-T1	95.9	290	12	0	1	290	1	290	5.52e-198	541	100	290	290	DTO11	BGC0001988	DTO11_FUN_006061	222007_1	3336624	3337496	scaffold_4	+	63	19	present	present	verified	27	antiSMASH
BGC0001988|c1|6102-7842|-|P174DRAFT_373375|MFS_general_substrate_transporter|PKX92296.1	DTO11_FUN_006060-T1	96.8	502	16	0	1	502	56	557	0	951	99.2	506	560	DTO11	BGC0001988	DTO11_FUN_006060	222006_1	3334187	3336206	scaffold_4	+	63	19	present	present	verified	27	antiSMASH
BGC0001988|c1|8248-10694|+|P174DRAFT_512928|putative_fungal-specific_transcription_factor|PKX92297.1	DTO11_FUN_006059-T1	91.3	669	40	1	66	716	36	704	0	1229	90.9	716	704	DTO11	BGC0001988	DTO11_FUN_006059	222005_1	3330089	3333823	scaffold_4	-	63	19	present	present	verified	27	antiSMASH
BGC0001988|c1|10719-12358|-|P174DRAFT_512929|hypothetical_protein|PKX92298.1	DTO11_FUN_006058-T1	93.9	495	19	1	1	484	1	495	0	935	99.4	487	495	DTO11	BGC0001988	DTO11_FUN_006058	222004_1	3329852	3331478	scaffold_4	+	63	19	present	present	verified	27	antiSMASH
BGC0001988|c1|12693-14356|+|P174DRAFT_460883|FAD_binding_domain_protein|PKX92299.1	DTO11_FUN_006057-T1	88.2	533	34	2	1	504	1	533	0	936	100	504	533	DTO11	BGC0001988	DTO11_FUN_006057	222003_1	3327863	3329526	scaffold_4	-	63	19	present	present	verified	27	antiSMASH
BGC0001988|c1|14663-15457|-|P174DRAFT_460884|putative_hydroxysteroid_dehydrogenase|PKX92300.1	DTO11_FUN_006056-T1	98.5	264	4	0	1	264	1	264	1.85e-183	503	100	264	264	DTO11	BGC0001988	DTO11_FUN_006056	222002_1	3326753	3327547	scaffold_4	+	63	19	present	present	verified	27	antiSMASH
BGC0001988|c1|15742-16344|+|P174DRAFT_451670|putative_scytalone_dehydratase|PKX92301.1	DTO11_FUN_006055-T1	85.8	183	5	1	1	162	1	183	2.05e-114	320	100	162	183	DTO11	BGC0001988	DTO11_FUN_006055	222001_1	3325873	3326475	scaffold_4	-	63	19	present	present	verified	27	antiSMASH
BGC0001988|c1|16568-18000|-|P174DRAFT_512932|hypothetical_protein|PKX92302.1	DTO11_FUN_006054-T1	94.8	346	6	1	99	444	1	334	1.02e-225	620	77.9	444	334	DTO11	BGC0001988	DTO11_FUN_006054	222000_1	3324217	3325873	scaffold_4	+	63	19	present	present	verified	27	antiSMASH
BGC0001988|c1|18802-19725|-|P174DRAFT_512933|S-adenosyl-L-methionine-dependent_methyltransferase|PKX92303.1	DTO11_FUN_006053-T1	77.7	309	21	3	1	261	1	309	5.9e-167	462	100	261	309	DTO11	BGC0001988	DTO11_FUN_006053	221999_1	3322551	3323837	scaffold_4	+	63	19	present	present	verified	27	antiSMASH
BGC0001988|c1|20092-21461|+|P174DRAFT_512934|hypothetical_protein|PKX92304.1	DTO11_FUN_006052-T1	87.9	456	32	1	1	433	1	456	6.34e-300	812	100	433	456	DTO11	BGC0001988	DTO11_FUN_006052	221998_1	3320830	3322200	scaffold_4	-	63	19	present	present	verified	27	antiSMASH
BGC0001988|c1|21655-22240|-|P174DRAFT_372388|hypothetical_protein|PKX92305.1	DTO11_FUN_006051-T1	97.4	151	4	0	1	151	1	151	3.39e-112	313	100	151	151	DTO11	BGC0001988	DTO11_FUN_006051	221997_1	3320077	3320639	scaffold_4	+	63	19	present	present	verified	27	antiSMASH
BGC0001988|c1|22456-23007|+|P174DRAFT_373009|DUF1772-domain-containing_protein|PKX92306.1	DTO11_FUN_006050-T1	92	162	13	0	1	162	1	162	1.19e-106	300	100	162	162	DTO11	BGC0001988	DTO11_FUN_006050	221996_1	3319309	3319859	scaffold_4	-	63	19	present	present	verified	27	antiSMASH
BGC0001988|c1|23258-24391|-|P174DRAFT_460891|metallo-beta-lactamase_superfamily_protein|PKX92307.1	DTO11_FUN_006049-T1	96.4	309	11	0	1	309	1	309	1.16e-220	601	96	322	314	DTO11	BGC0001988	DTO11_FUN_006049	221995_1	3317938	3318943	scaffold_4	+	63	19	present	present	verified	27	antiSMASH
BGC0001988|c1|24740-30462|+|P174DRAFT_487776|putative_polyketide_synthase|PKX92308.1	DTO11_FUN_006048-T1	94.8	1824	59	4	1	1792	1	1821	0	3396	100	1792	1821	DTO11	BGC0001988	DTO11_FUN_006048	221994_1	3311904	3317602	scaffold_4	-	63	19	present	present	verified	27	antiSMASH
BGC0001988|c1|31035-32171|-|P174DRAFT_372038|hypothetical_protein|PKX92309.1	DTO11_FUN_006047-T1	91.5	378	32	0	1	378	1	378	9.47e-241	657	100	378	378	DTO11	BGC0001988	DTO11_FUN_006047	221993_1	3310303	3311439	scaffold_4	+	63	19	present	present	verified	27	antiSMASH
BGC0001988|c1|6-579|+|P174DRAFT_442171|hypothetical_protein|PKX92291.1	DTO12_FUN_001555-T1	95.3	149	7	0	1	149	1	149	3.32e-103	290	99.3	150	150	DTO12	BGC0001988	DTO12_FUN_001555	222011_1	88251	88796	scaffold_2	+	63	19	present	present	verified	27	antiSMASH
BGC0001988|c1|863-1660|+|P174DRAFT_371720|hypothetical_protein|PKX92292.1	DTO12_FUN_001556-T1	95.8	265	11	0	1	265	1	265	3.97e-188	514	100	265	265	DTO12	BGC0001988	DTO12_FUN_001556	222010_1	89079	89876	scaffold_2	+	63	19	present	present	verified	27	antiSMASH
BGC0001988|c1|1863-2373|+|P174DRAFT_407796|hypothetical_protein|PKX92293.1	DTO12_FUN_001557-T1	96	151	6	0	1	151	1	151	1.41e-109	306	100	151	151	DTO12	BGC0001988	DTO12_FUN_001557	222009_1	90031	90641	scaffold_2	+	63	19	present	present	verified	27	antiSMASH
BGC0001988|c1|2781-4443|+|P174DRAFT_372675|putative_cytochrome_P450_oxidoreductase|PKX92294.1	DTO12_FUN_001558-T1	95.1	515	22	1	1	515	2	513	0	1017	100	515	513	DTO12	BGC0001988	DTO12_FUN_001558	222008_1	90983	92648	scaffold_2	+	63	19	present	present	verified	27	antiSMASH
BGC0001988|c1|4666-5538|-|P174DRAFT_421366|putative_NADP(+)-dependent_dehydrogenase|PKX92295.1	DTO12_FUN_001559-T1	95.9	290	12	0	1	290	1	290	5.84e-198	541	100	290	290	DTO12	BGC0001988	DTO12_FUN_001559	222007_1	92802	93759	scaffold_2	-	63	19	present	present	verified	27	antiSMASH
BGC0001988|c1|6102-7842|-|P174DRAFT_373375|MFS_general_substrate_transporter|PKX92296.1	DTO12_FUN_001560-T1	96.8	502	16	0	1	502	57	558	0	952	99.2	506	561	DTO12	BGC0001988	DTO12_FUN_001560	222006_1	94161	96337	scaffold_2	-	63	19	present	present	verified	27	antiSMASH
BGC0001988|c1|8248-10694|+|P174DRAFT_512928|putative_fungal-specific_transcription_factor|PKX92297.1	DTO12_FUN_001561-T1	91.3	669	40	1	66	716	36	704	0	1229	90.9	716	704	DTO12	BGC0001988	DTO12_FUN_001561	222005_1	96500	99987	scaffold_2	+	63	19	present	present	verified	27	antiSMASH
BGC0001988|c1|10719-12358|-|P174DRAFT_512929|hypothetical_protein|PKX92298.1	DTO12_FUN_001562-T1	95.9	484	20	0	1	484	1	484	0	941	99.4	487	484	DTO12	BGC0001988	DTO12_FUN_001562	222004_1	98908	100534	scaffold_2	-	63	19	present	present	verified	27	antiSMASH
BGC0001988|c1|12693-14356|+|P174DRAFT_460883|FAD_binding_domain_protein|PKX92299.1	DTO12_FUN_001563-T1	88.4	533	33	2	1	504	1	533	0	938	100	504	533	DTO12	BGC0001988	DTO12_FUN_001563	222003_1	100860	102523	scaffold_2	+	63	19	present	present	verified	27	antiSMASH
BGC0001988|c1|14663-15457|-|P174DRAFT_460884|putative_hydroxysteroid_dehydrogenase|PKX92300.1	DTO12_FUN_001564-T1	99.2	264	2	0	1	264	1	264	8.3e-185	506	100	264	264	DTO12	BGC0001988	DTO12_FUN_001564	222002_1	102839	103633	scaffold_2	-	63	19	present	present	verified	27	antiSMASH
BGC0001988|c1|15742-16344|+|P174DRAFT_451670|putative_scytalone_dehydratase|PKX92301.1	DTO12_FUN_001565-T1	96.9	162	5	0	1	162	1	162	1.37e-119	333	100	162	162	DTO12	BGC0001988	DTO12_FUN_001565	222001_1	103911	104513	scaffold_2	+	63	19	present	present	verified	27	antiSMASH
BGC0001988|c1|16568-18000|-|P174DRAFT_512932|hypothetical_protein|PKX92302.1	DTO12_FUN_001566-T1	95.3	444	8	2	1	444	1	431	6.15e-295	799	100	444	431	DTO12	BGC0001988	DTO12_FUN_001566	222000_1	104492	106151	scaffold_2	-	63	19	present	present	verified	27	antiSMASH
BGC0001988|c1|18802-19725|-|P174DRAFT_512933|S-adenosyl-L-methionine-dependent_methyltransferase|PKX92303.1	DTO12_FUN_001567-T1	77.7	309	21	3	1	261	1	309	6.24e-167	462	100	261	309	DTO12	BGC0001988	DTO12_FUN_001567	221999_1	106906	107835	scaffold_2	-	63	19	present	present	verified	27	antiSMASH
BGC0001988|c1|20092-21461|+|P174DRAFT_512934|hypothetical_protein|PKX92304.1	DTO12_FUN_001568-T1	87.9	456	32	1	1	433	1	456	6.71e-300	812	100	433	456	DTO12	BGC0001988	DTO12_FUN_001568	221998_1	108186	109556	scaffold_2	+	63	19	present	present	verified	27	antiSMASH
BGC0001988|c1|21655-22240|-|P174DRAFT_372388|hypothetical_protein|PKX92305.1	DTO12_FUN_001569-T1	98	151	3	0	1	151	1	151	1.25e-112	314	100	151	151	DTO12	BGC0001988	DTO12_FUN_001569	221997_1	109747	110309	scaffold_2	-	63	19	present	present	verified	27	antiSMASH
BGC0001988|c1|22456-23007|+|P174DRAFT_373009|DUF1772-domain-containing_protein|PKX92306.1	DTO12_FUN_001570-T1	92	162	13	0	1	162	1	162	1.26e-106	300	100	162	162	DTO12	BGC0001988	DTO12_FUN_001570	221996_1	110527	111077	scaffold_2	+	63	19	present	present	verified	27	antiSMASH
BGC0001988|c1|23258-24391|-|P174DRAFT_460891|metallo-beta-lactamase_superfamily_protein|PKX92307.1	DTO12_FUN_001571-T1	96.8	309	10	0	1	309	1	309	8.62e-221	602	96	322	314	DTO12	BGC0001988	DTO12_FUN_001571	221995_1	111443	112448	scaffold_2	-	63	19	present	present	verified	27	antiSMASH
BGC0001988|c1|24740-30462|+|P174DRAFT_487776|putative_polyketide_synthase|PKX92308.1	DTO12_FUN_001572-T1	94.9	1824	58	4	1	1792	1	1821	0	3395	100	1792	1821	DTO12	BGC0001988	DTO12_FUN_001572	221994_1	112784	118482	scaffold_2	+	63	19	present	present	verified	27	antiSMASH
BGC0001988|c1|31035-32171|-|P174DRAFT_372038|hypothetical_protein|PKX92309.1	DTO12_FUN_001573-T1	91.8	378	31	0	1	378	1	378	1.22e-241	659	100	378	378	DTO12	BGC0001988	DTO12_FUN_001573	221993_1	118948	120084	scaffold_2	-	63	19	present	present	verified	27	antiSMASH
BGC0001988|c1|6-579|+|P174DRAFT_442171|hypothetical_protein|PKX92291.1	DTO13_FUN_009385-T1	95.3	149	7	0	1	149	1	149	3.16e-103	290	99.3	150	150	DTO13	BGC0001988	DTO13_FUN_009385	222011_1	3273908	3274658	scaffold_6	-	63	19	present	present	verified	27	antiSMASH
BGC0001988|c1|863-1660|+|P174DRAFT_371720|hypothetical_protein|PKX92292.1	DTO13_FUN_009384-T1	95.8	265	11	0	1	265	1	265	3.78e-188	514	100	265	265	DTO13	BGC0001988	DTO13_FUN_009384	222010_1	3272911	3273708	scaffold_6	-	63	19	present	present	verified	27	antiSMASH
BGC0001988|c1|1863-2373|+|P174DRAFT_407796|hypothetical_protein|PKX92293.1	DTO13_FUN_009383-T1	95.4	151	7	0	1	151	1	151	4.49e-108	303	100	151	151	DTO13	BGC0001988	DTO13_FUN_009383	222009_1	3272121	3272764	scaffold_6	-	63	19	present	present	verified	27	antiSMASH
BGC0001988|c1|2781-4443|+|P174DRAFT_372675|putative_cytochrome_P450_oxidoreductase|PKX92294.1	DTO13_FUN_009382-T1	95.1	515	22	1	1	515	2	513	0	1017	100	515	513	DTO13	BGC0001988	DTO13_FUN_009382	222008_1	3270139	3271804	scaffold_6	-	63	19	present	present	verified	27	antiSMASH
BGC0001988|c1|4666-5538|-|P174DRAFT_421366|putative_NADP(+)-dependent_dehydrogenase|PKX92295.1	DTO13_FUN_009381-T1	95.9	290	12	0	1	290	1	290	5.57e-198	541	100	290	290	DTO13	BGC0001988	DTO13_FUN_009381	222007_1	3269027	3269899	scaffold_6	+	63	19	present	present	verified	27	antiSMASH
BGC0001988|c1|6102-7842|-|P174DRAFT_373375|MFS_general_substrate_transporter|PKX92296.1	DTO13_FUN_009380-T1	96.8	502	16	0	1	502	55	556	0	951	99.2	506	559	DTO13	BGC0001988	DTO13_FUN_009380	222006_1	3266566	3268665	scaffold_6	+	63	19	present	present	verified	27	antiSMASH
BGC0001988|c1|8248-10694|+|P174DRAFT_512928|putative_fungal-specific_transcription_factor|PKX92297.1	DTO13_FUN_009379-T1	91.3	669	40	1	66	716	36	704	0	1229	90.9	716	704	DTO13	BGC0001988	DTO13_FUN_009379	222005_1	3262563	3266238	scaffold_6	-	63	19	present	present	verified	27	antiSMASH
BGC0001988|c1|10719-12358|-|P174DRAFT_512929|hypothetical_protein|PKX92298.1	DTO13_FUN_009378-T1	96.1	484	19	0	1	484	1	484	0	940	99.4	487	484	DTO13	BGC0001988	DTO13_FUN_009378	222004_1	3262258	3263884	scaffold_6	+	63	19	present	present	verified	27	antiSMASH
BGC0001988|c1|12693-14356|+|P174DRAFT_460883|FAD_binding_domain_protein|PKX92299.1	DTO13_FUN_009377-T1	88.4	533	33	2	1	504	1	533	0	943	100	504	533	DTO13	BGC0001988	DTO13_FUN_009377	222003_1	3260269	3261932	scaffold_6	-	63	19	present	present	verified	27	antiSMASH
BGC0001988|c1|14663-15457|-|P174DRAFT_460884|putative_hydroxysteroid_dehydrogenase|PKX92300.1	DTO13_FUN_009376-T1	98.5	264	4	0	1	264	1	264	3.76e-183	502	100	264	264	DTO13	BGC0001988	DTO13_FUN_009376	222002_1	3259159	3259953	scaffold_6	+	63	19	present	present	verified	27	antiSMASH
BGC0001988|c1|15742-16344|+|P174DRAFT_451670|putative_scytalone_dehydratase|PKX92301.1	DTO13_FUN_009375-T1	85.8	183	5	1	1	162	1	183	2.07e-114	320	100	162	183	DTO13	BGC0001988	DTO13_FUN_009375	222001_1	3258279	3258881	scaffold_6	-	63	19	present	present	verified	27	antiSMASH
BGC0001988|c1|16568-18000|-|P174DRAFT_512932|hypothetical_protein|PKX92302.1	DTO13_FUN_009374-T1	95.1	346	5	1	99	444	1	334	1.26e-226	622	77.9	444	334	DTO13	BGC0001988	DTO13_FUN_009374	222000_1	3256465	3258729	scaffold_6	+	63	19	present	present	verified	27	antiSMASH
BGC0001988|c1|18802-19725|-|P174DRAFT_512933|S-adenosyl-L-methionine-dependent_methyltransferase|PKX92303.1	DTO13_FUN_009373-T1	77.3	309	22	3	1	261	1	309	9.83e-166	459	100	261	309	DTO13	BGC0001988	DTO13_FUN_009373	221999_1	3254944	3255873	scaffold_6	+	63	19	present	present	verified	27	antiSMASH
BGC0001988|c1|20092-21461|+|P174DRAFT_512934|hypothetical_protein|PKX92304.1	DTO13_FUN_009372-T1	87.9	456	32	1	1	433	1	456	6.39e-300	812	100	433	456	DTO13	BGC0001988	DTO13_FUN_009372	221998_1	3253227	3254597	scaffold_6	-	63	19	present	present	verified	27	antiSMASH
BGC0001988|c1|21655-22240|-|P174DRAFT_372388|hypothetical_protein|PKX92305.1	DTO13_FUN_009371-T1	98	151	3	0	1	151	1	151	1.19e-112	314	100	151	151	DTO13	BGC0001988	DTO13_FUN_009371	221997_1	3252474	3253036	scaffold_6	+	63	19	present	present	verified	27	antiSMASH
BGC0001988|c1|22456-23007|+|P174DRAFT_373009|DUF1772-domain-containing_protein|PKX92306.1	DTO13_FUN_009370-T1	92	162	13	0	1	162	1	162	1.2e-106	300	100	162	162	DTO13	BGC0001988	DTO13_FUN_009370	221996_1	3251706	3252256	scaffold_6	-	63	19	present	present	verified	27	antiSMASH
BGC0001988|c1|23258-24391|-|P174DRAFT_460891|metallo-beta-lactamase_superfamily_protein|PKX92307.1	DTO13_FUN_009369-T1	96.8	309	10	0	1	309	1	309	8.22e-221	602	96	322	314	DTO13	BGC0001988	DTO13_FUN_009369	221995_1	3250335	3251340	scaffold_6	+	63	19	present	present	verified	27	antiSMASH
BGC0001988|c1|24740-30462|+|P174DRAFT_487776|putative_polyketide_synthase|PKX92308.1	DTO13_FUN_009368-T1	94.8	1824	60	4	1	1792	1	1821	0	3394	100	1792	1821	DTO13	BGC0001988	DTO13_FUN_009368	221994_1	3244301	3249999	scaffold_6	-	63	19	present	present	verified	27	antiSMASH
BGC0001988|c1|31035-32171|-|P174DRAFT_372038|hypothetical_protein|PKX92309.1	DTO13_FUN_009367-T1	91.5	378	32	0	1	378	1	378	1.36e-240	657	100	378	378	DTO13	BGC0001988	DTO13_FUN_009367	221993_1	3242699	3243835	scaffold_6	+	63	19	present	present	verified	27	antiSMASH
BGC0001988|c1|6-579|+|P174DRAFT_442171|hypothetical_protein|PKX92291.1	DTO14_FUN_006006-T1	95.3	149	7	0	1	149	1	149	3.3e-103	290	99.3	150	150	DTO14	BGC0001988	DTO14_FUN_006006	222011_1	3273083	3273949	scaffold_4	-	63	19	present	present	verified	27	antiSMASH
BGC0001988|c1|863-1660|+|P174DRAFT_371720|hypothetical_protein|PKX92292.1	DTO14_FUN_006005-T1	95.8	265	11	0	1	265	1	265	3.94e-188	514	100	265	265	DTO14	BGC0001988	DTO14_FUN_006005	222010_1	3272157	3273026	scaffold_4	-	63	19	present	present	verified	27	antiSMASH
BGC0001988|c1|1863-2373|+|P174DRAFT_407796|hypothetical_protein|PKX92293.1	DTO14_FUN_006004-T1	95.4	151	7	0	1	151	1	151	1.98e-109	306	100	151	151	DTO14	BGC0001988	DTO14_FUN_006004	222009_1	3271379	3272002	scaffold_4	-	63	19	present	present	verified	27	antiSMASH
BGC0001988|c1|2781-4443|+|P174DRAFT_372675|putative_cytochrome_P450_oxidoreductase|PKX92294.1	DTO14_FUN_006003-T1	95.1	515	22	1	1	515	2	513	0	1017	100	515	513	DTO14	BGC0001988	DTO14_FUN_006003	222008_1	3269385	3271050	scaffold_4	-	63	19	present	present	verified	27	antiSMASH
BGC0001988|c1|4666-5538|-|P174DRAFT_421366|putative_NADP(+)-dependent_dehydrogenase|PKX92295.1	DTO14_FUN_006002-T1	95.9	290	12	0	1	290	1	290	5.8e-198	541	100	290	290	DTO14	BGC0001988	DTO14_FUN_006002	222007_1	3268274	3269146	scaffold_4	+	63	19	present	present	verified	27	antiSMASH
BGC0001988|c1|6102-7842|-|P174DRAFT_373375|MFS_general_substrate_transporter|PKX92296.1	DTO14_FUN_006001-T1	97	502	15	0	1	502	55	556	0	952	99.2	506	559	DTO14	BGC0001988	DTO14_FUN_006001	222006_1	3265537	3267803	scaffold_4	+	63	19	present	present	verified	27	antiSMASH
BGC0001988|c1|8248-10694|+|P174DRAFT_512928|putative_fungal-specific_transcription_factor|PKX92297.1	DTO14_FUN_006000-T1	91.2	669	41	1	66	716	36	704	0	1227	90.9	716	704	DTO14	BGC0001988	DTO14_FUN_006000	222005_1	3261740	3265542	scaffold_4	-	63	19	present	present	verified	27	antiSMASH
BGC0001988|c1|10719-12358|-|P174DRAFT_512929|hypothetical_protein|PKX92298.1	DTO14_FUN_005999-T1	96.3	408	15	0	77	484	5	412	2e-295	801	83.8	487	412	DTO14	BGC0001988	DTO14_FUN_005999	222004_1	3261740	3263131	scaffold_4	+	63	19	present	present	verified	27	antiSMASH
BGC0001988|c1|12693-14356|+|P174DRAFT_460883|FAD_binding_domain_protein|PKX92299.1	DTO14_FUN_005998-T1	88.4	533	33	2	1	504	1	533	0	943	100	504	533	DTO14	BGC0001988	DTO14_FUN_005998	222003_1	3259516	3261179	scaffold_4	-	63	19	present	present	verified	27	antiSMASH
BGC0001988|c1|14663-15457|-|P174DRAFT_460884|putative_hydroxysteroid_dehydrogenase|PKX92300.1	DTO14_FUN_005997-T1	98.5	264	4	0	1	264	1	264	3.91e-183	502	100	264	264	DTO14	BGC0001988	DTO14_FUN_005997	222002_1	3258406	3259200	scaffold_4	+	63	19	present	present	verified	27	antiSMASH
BGC0001988|c1|15742-16344|+|P174DRAFT_451670|putative_scytalone_dehydratase|PKX92301.1	DTO14_FUN_005996-T1	85.8	183	5	1	1	162	1	183	2.15e-114	320	100	162	183	DTO14	BGC0001988	DTO14_FUN_005996	222001_1	3257526	3258128	scaffold_4	-	63	19	present	present	verified	27	antiSMASH
BGC0001988|c1|16568-18000|-|P174DRAFT_512932|hypothetical_protein|PKX92302.1	DTO14_FUN_005995-T1	95.1	346	5	1	99	444	1	334	1.31e-226	622	77.9	444	334	DTO14	BGC0001988	DTO14_FUN_005995	222000_1	3255694	3257559	scaffold_4	+	63	19	present	present	verified	27	antiSMASH
BGC0001988|c1|18802-19725|-|P174DRAFT_512933|S-adenosyl-L-methionine-dependent_methyltransferase|PKX92303.1	DTO14_FUN_005994-T1	77.3	309	22	3	1	261	1	309	1.02e-165	459	100	261	309	DTO14	BGC0001988	DTO14_FUN_005994	221999_1	3254191	3255120	scaffold_4	+	63	19	present	present	verified	27	antiSMASH
BGC0001988|c1|20092-21461|+|P174DRAFT_512934|hypothetical_protein|PKX92304.1	DTO14_FUN_005993-T1	87.9	456	32	1	1	433	1	456	6.66e-300	812	100	433	456	DTO14	BGC0001988	DTO14_FUN_005993	221998_1	3252474	3253844	scaffold_4	-	63	19	present	present	verified	27	antiSMASH
BGC0001988|c1|21655-22240|-|P174DRAFT_372388|hypothetical_protein|PKX92305.1	DTO14_FUN_005992-T1	98	151	3	0	1	151	1	151	1.24e-112	314	100	151	151	DTO14	BGC0001988	DTO14_FUN_005992	221997_1	3251721	3252283	scaffold_4	+	63	19	present	present	verified	27	antiSMASH
BGC0001988|c1|22456-23007|+|P174DRAFT_373009|DUF1772-domain-containing_protein|PKX92306.1	DTO14_FUN_005991-T1	92	162	13	0	1	162	1	162	1.25e-106	300	100	162	162	DTO14	BGC0001988	DTO14_FUN_005991	221996_1	3250953	3251503	scaffold_4	-	63	19	present	present	verified	27	antiSMASH
BGC0001988|c1|23258-24391|-|P174DRAFT_460891|metallo-beta-lactamase_superfamily_protein|PKX92307.1	DTO14_FUN_005990-T1	96.8	309	10	0	1	309	1	309	8.56e-221	602	96	322	314	DTO14	BGC0001988	DTO14_FUN_005990	221995_1	3249582	3250587	scaffold_4	+	63	19	present	present	verified	27	antiSMASH
BGC0001988|c1|24740-30462|+|P174DRAFT_487776|putative_polyketide_synthase|PKX92308.1	DTO14_FUN_005989-T1	94.8	1824	60	4	1	1792	1	1821	0	3394	100	1792	1821	DTO14	BGC0001988	DTO14_FUN_005989	221994_1	3243548	3249246	scaffold_4	-	63	19	present	present	verified	27	antiSMASH
BGC0001988|c1|31035-32171|-|P174DRAFT_372038|hypothetical_protein|PKX92309.1	DTO14_FUN_005988-T1	91.5	378	32	0	1	378	1	378	1.41e-240	657	100	378	378	DTO14	BGC0001988	DTO14_FUN_005988	221993_1	3241946	3243082	scaffold_4	+	63	19	present	present	verified	27	antiSMASH
BGC0001988|c1|6-579|+|P174DRAFT_442171|hypothetical_protein|PKX92291.1	DTO15_FUN_006035-T1	95.3	149	7	0	1	149	1	149	3.28e-103	290	99.3	150	150	DTO15	BGC0001988	DTO15_FUN_006035	222011_1	3280620	3281445	scaffold_4	-	63	19	present	present	verified	27	antiSMASH
BGC0001988|c1|863-1660|+|P174DRAFT_371720|hypothetical_protein|PKX92292.1	DTO15_FUN_006034-T1	95.8	265	11	0	1	265	1	265	3.92e-188	514	100	265	265	DTO15	BGC0001988	DTO15_FUN_006034	222010_1	3279684	3280481	scaffold_4	-	63	19	present	present	verified	27	antiSMASH
BGC0001988|c1|1863-2373|+|P174DRAFT_407796|hypothetical_protein|PKX92293.1	DTO15_FUN_006033-T1	95.4	151	7	0	1	151	1	151	1.97e-109	306	100	151	151	DTO15	BGC0001988	DTO15_FUN_006033	222009_1	3278907	3279530	scaffold_4	-	63	19	present	present	verified	27	antiSMASH
BGC0001988|c1|2781-4443|+|P174DRAFT_372675|putative_cytochrome_P450_oxidoreductase|PKX92294.1	DTO15_FUN_006032-T1	95.1	515	22	1	1	515	2	513	0	1017	100	515	513	DTO15	BGC0001988	DTO15_FUN_006032	222008_1	3276912	3278577	scaffold_4	-	63	19	present	present	verified	27	antiSMASH
BGC0001988|c1|4666-5538|-|P174DRAFT_421366|putative_NADP(+)-dependent_dehydrogenase|PKX92295.1	DTO15_FUN_006031-T1	95.9	290	12	0	1	290	1	290	5.77e-198	541	100	290	290	DTO15	BGC0001988	DTO15_FUN_006031	222007_1	3275801	3276673	scaffold_4	+	63	19	present	present	verified	27	antiSMASH
BGC0001988|c1|6102-7842|-|P174DRAFT_373375|MFS_general_substrate_transporter|PKX92296.1	DTO15_FUN_006030-T1	97	502	15	0	1	502	55	556	0	952	99.2	506	559	DTO15	BGC0001988	DTO15_FUN_006030	222006_1	3273105	3275379	scaffold_4	+	63	19	present	present	verified	27	antiSMASH
BGC0001988|c1|8248-10694|+|P174DRAFT_512928|putative_fungal-specific_transcription_factor|PKX92297.1	DTO15_FUN_006029-T1	91.2	669	41	1	66	716	36	704	0	1227	90.9	716	704	DTO15	BGC0001988	DTO15_FUN_006029	222005_1	3269274	3273029	scaffold_4	-	63	19	present	present	verified	27	antiSMASH
BGC0001988|c1|10719-12358|-|P174DRAFT_512929|hypothetical_protein|PKX92298.1	DTO15_FUN_006028-T1	96.1	484	19	0	1	484	1	484	0	940	99.4	487	484	DTO15	BGC0001988	DTO15_FUN_006028	222004_1	3269032	3270658	scaffold_4	+	63	19	present	present	verified	27	antiSMASH
BGC0001988|c1|12693-14356|+|P174DRAFT_460883|FAD_binding_domain_protein|PKX92299.1	DTO15_FUN_006027-T1	88.4	533	33	2	1	504	1	533	0	943	100	504	533	DTO15	BGC0001988	DTO15_FUN_006027	222003_1	3267043	3268706	scaffold_4	-	63	19	present	present	verified	27	antiSMASH
BGC0001988|c1|14663-15457|-|P174DRAFT_460884|putative_hydroxysteroid_dehydrogenase|PKX92300.1	DTO15_FUN_006026-T1	98.5	264	4	0	1	264	1	264	3.89e-183	502	100	264	264	DTO15	BGC0001988	DTO15_FUN_006026	222002_1	3265933	3266727	scaffold_4	+	63	19	present	present	verified	27	antiSMASH
BGC0001988|c1|15742-16344|+|P174DRAFT_451670|putative_scytalone_dehydratase|PKX92301.1	DTO15_FUN_006025-T1	85.8	183	5	1	1	162	1	183	2.14e-114	320	100	162	183	DTO15	BGC0001988	DTO15_FUN_006025	222001_1	3265053	3265860	scaffold_4	-	63	19	present	present	verified	27	antiSMASH
BGC0001988|c1|16568-18000|-|P174DRAFT_512932|hypothetical_protein|PKX92302.1	DTO15_FUN_006024-T1	95.5	444	7	2	1	444	1	431	7.39e-296	801	100	444	431	DTO15	BGC0001988	DTO15_FUN_006024	222000_1	3263286	3266295	scaffold_4	+	63	19	present	present	verified	27	antiSMASH
BGC0001988|c1|18802-19725|-|P174DRAFT_512933|S-adenosyl-L-methionine-dependent_methyltransferase|PKX92303.1	DTO15_FUN_006023-T1	77.3	309	22	3	1	261	1	309	1.02e-165	459	100	261	309	DTO15	BGC0001988	DTO15_FUN_006023	221999_1	3261718	3262647	scaffold_4	+	63	19	present	present	verified	27	antiSMASH
BGC0001988|c1|20092-21461|+|P174DRAFT_512934|hypothetical_protein|PKX92304.1	DTO15_FUN_006022-T1	87.9	456	32	1	1	433	1	456	6.62e-300	812	100	433	456	DTO15	BGC0001988	DTO15_FUN_006022	221998_1	3260001	3261371	scaffold_4	-	63	19	present	present	verified	27	antiSMASH
BGC0001988|c1|21655-22240|-|P174DRAFT_372388|hypothetical_protein|PKX92305.1	DTO15_FUN_006021-T1	98	151	3	0	1	151	1	151	1.23e-112	314	100	151	151	DTO15	BGC0001988	DTO15_FUN_006021	221997_1	3259248	3259810	scaffold_4	+	63	19	present	present	verified	27	antiSMASH
BGC0001988|c1|22456-23007|+|P174DRAFT_373009|DUF1772-domain-containing_protein|PKX92306.1	DTO15_FUN_006020-T1	92	162	13	0	1	162	1	162	1.25e-106	300	100	162	162	DTO15	BGC0001988	DTO15_FUN_006020	221996_1	3258480	3259030	scaffold_4	-	63	19	present	present	verified	27	antiSMASH
BGC0001988|c1|23258-24391|-|P174DRAFT_460891|metallo-beta-lactamase_superfamily_protein|PKX92307.1	DTO15_FUN_006019-T1	96.8	309	10	0	1	309	1	309	8.51e-221	602	96	322	314	DTO15	BGC0001988	DTO15_FUN_006019	221995_1	3257109	3258114	scaffold_4	+	63	19	present	present	verified	27	antiSMASH
BGC0001988|c1|24740-30462|+|P174DRAFT_487776|putative_polyketide_synthase|PKX92308.1	DTO15_FUN_006018-T1	94.8	1824	60	4	1	1792	1	1821	0	3394	100	1792	1821	DTO15	BGC0001988	DTO15_FUN_006018	221994_1	3251075	3256773	scaffold_4	-	63	19	present	present	verified	27	antiSMASH
BGC0001988|c1|31035-32171|-|P174DRAFT_372038|hypothetical_protein|PKX92309.1	DTO15_FUN_006017-T1	91.5	378	32	0	1	378	1	378	1.4e-240	657	100	378	378	DTO15	BGC0001988	DTO15_FUN_006017	221993_1	3249473	3250609	scaffold_4	+	63	19	present	present	verified	27	antiSMASH
BGC0001988|c1|6-579|+|P174DRAFT_442171|hypothetical_protein|PKX92291.1	DTO16_FUN_008793-T1	95.3	149	7	0	1	149	1	149	3.16e-103	290	99.3	150	150	DTO16	BGC0001988	DTO16_FUN_008793	222011_1	3305746	3306355	scaffold_6	-	63	19	present	present	verified	27	antiSMASH
BGC0001988|c1|863-1660|+|P174DRAFT_371720|hypothetical_protein|PKX92292.1	DTO16_FUN_008792-T1	95.8	265	11	0	1	265	1	265	3.78e-188	514	100	265	265	DTO16	BGC0001988	DTO16_FUN_008792	222010_1	3304666	3305463	scaffold_6	-	63	19	present	present	verified	27	antiSMASH
BGC0001988|c1|1863-2373|+|P174DRAFT_407796|hypothetical_protein|PKX92293.1	DTO16_FUN_008791-T1	96	151	6	0	1	151	1	151	1.34e-109	306	100	151	151	DTO16	BGC0001988	DTO16_FUN_008791	222009_1	3303961	3304509	scaffold_6	-	63	19	present	present	verified	27	antiSMASH
BGC0001988|c1|2781-4443|+|P174DRAFT_372675|putative_cytochrome_P450_oxidoreductase|PKX92294.1	DTO16_FUN_008790-T1	95.1	515	22	1	1	515	2	513	0	1016	100	515	513	DTO16	BGC0001988	DTO16_FUN_008790	222008_1	3301894	3303559	scaffold_6	-	63	19	present	present	verified	27	antiSMASH
BGC0001988|c1|4666-5538|-|P174DRAFT_421366|putative_NADP(+)-dependent_dehydrogenase|PKX92295.1	DTO16_FUN_008789-T1	95.5	290	13	0	1	290	1	290	1.12e-197	541	100	290	290	DTO16	BGC0001988	DTO16_FUN_008789	222007_1	3300783	3301655	scaffold_6	+	63	19	present	present	verified	27	antiSMASH
BGC0001988|c1|6102-7842|-|P174DRAFT_373375|MFS_general_substrate_transporter|PKX92296.1	DTO16_FUN_008788-T1	96	253	10	0	250	502	1	253	3.08e-169	476	50	506	256	DTO16	BGC0001988	DTO16_FUN_008788	222006_1	3299425	3300248	scaffold_6	+	63	19	present	present	verified	27	antiSMASH
BGC0001988|c1|8248-10694|+|P174DRAFT_512928|putative_fungal-specific_transcription_factor|PKX92297.1	DTO16_FUN_008785-T1	89	383	24	1	333	697	1	383	7.68e-245	684	51	716	451	DTO16	BGC0001988	DTO16_FUN_008785	222005_1	3295372	3297340	scaffold_6	-	63	19	present	present	verified	27	antiSMASH
BGC0001988|c1|10719-12358|-|P174DRAFT_512929|hypothetical_protein|PKX92298.1	DTO16_FUN_008784-T1	96.1	484	19	0	1	484	1	484	0	940	99.4	487	484	DTO16	BGC0001988	DTO16_FUN_008784	222004_1	3294014	3295640	scaffold_6	+	63	19	present	present	verified	27	antiSMASH
BGC0001988|c1|12693-14356|+|P174DRAFT_460883|FAD_binding_domain_protein|PKX92299.1	DTO16_FUN_008783-T1	88.4	533	33	2	1	504	1	533	0	943	100	504	533	DTO16	BGC0001988	DTO16_FUN_008783	222003_1	3292025	3293688	scaffold_6	-	63	19	present	present	verified	27	antiSMASH
BGC0001988|c1|14663-15457|-|P174DRAFT_460884|putative_hydroxysteroid_dehydrogenase|PKX92300.1	DTO16_FUN_008782-T1	99.2	264	2	0	1	264	1	264	7.9e-185	506	100	264	264	DTO16	BGC0001988	DTO16_FUN_008782	222002_1	3290915	3291709	scaffold_6	+	63	19	present	present	verified	27	antiSMASH
BGC0001988|c1|15742-16344|+|P174DRAFT_451670|putative_scytalone_dehydratase|PKX92301.1	DTO16_FUN_008781-T1	85.8	183	5	1	1	162	1	183	2.07e-114	320	100	162	183	DTO16	BGC0001988	DTO16_FUN_008781	222001_1	3290035	3290637	scaffold_6	-	63	19	present	present	verified	27	antiSMASH
BGC0001988|c1|16568-18000|-|P174DRAFT_512932|hypothetical_protein|PKX92302.1	DTO16_FUN_008780-T1	95.5	444	8	1	1	444	1	432	2.22e-297	805	100	444	432	DTO16	BGC0001988	DTO16_FUN_008780	222000_1	3288397	3289906	scaffold_6	+	63	19	present	present	verified	27	antiSMASH
BGC0001988|c1|18802-19725|-|P174DRAFT_512933|S-adenosyl-L-methionine-dependent_methyltransferase|PKX92303.1	DTO16_FUN_008779-T1	77.7	309	21	3	1	261	1	309	5.94e-167	462	100	261	309	DTO16	BGC0001988	DTO16_FUN_008779	221999_1	3286715	3287644	scaffold_6	+	63	19	present	present	verified	27	antiSMASH
BGC0001988|c1|20092-21461|+|P174DRAFT_512934|hypothetical_protein|PKX92304.1	DTO16_FUN_008778-T1	87.9	456	32	1	1	433	1	456	6.39e-300	812	100	433	456	DTO16	BGC0001988	DTO16_FUN_008778	221998_1	3284994	3286364	scaffold_6	-	63	19	present	present	verified	27	antiSMASH
BGC0001988|c1|21655-22240|-|P174DRAFT_372388|hypothetical_protein|PKX92305.1	DTO16_FUN_008777-T1	98	151	3	0	1	151	1	151	1.19e-112	314	100	151	151	DTO16	BGC0001988	DTO16_FUN_008777	221997_1	3284241	3284803	scaffold_6	+	63	19	present	present	verified	27	antiSMASH
BGC0001988|c1|22456-23007|+|P174DRAFT_373009|DUF1772-domain-containing_protein|PKX92306.1	DTO16_FUN_008776-T1	92	162	13	0	1	162	1	162	1.2e-106	300	100	162	162	DTO16	BGC0001988	DTO16_FUN_008776	221996_1	3283473	3284023	scaffold_6	-	63	19	present	present	verified	27	antiSMASH
BGC0001988|c1|23258-24391|-|P174DRAFT_460891|metallo-beta-lactamase_superfamily_protein|PKX92307.1	DTO16_FUN_008775-T1	96.8	309	10	0	1	309	1	309	8.21e-221	602	96	322	314	DTO16	BGC0001988	DTO16_FUN_008775	221995_1	3282102	3283107	scaffold_6	+	63	19	present	present	verified	27	antiSMASH
BGC0001988|c1|24740-30462|+|P174DRAFT_487776|putative_polyketide_synthase|PKX92308.1	DTO16_FUN_008774-T1	94.8	1824	59	4	1	1792	1	1821	0	3393	100	1792	1821	DTO16	BGC0001988	DTO16_FUN_008774	221994_1	3276068	3281766	scaffold_6	-	63	19	present	present	verified	27	antiSMASH
BGC0001988|c1|31035-32171|-|P174DRAFT_372038|hypothetical_protein|PKX92309.1	DTO16_FUN_008773-T1	91.8	378	31	0	1	378	1	378	1.16e-241	659	100	378	378	DTO16	BGC0001988	DTO16_FUN_008773	221993_1	3274466	3275602	scaffold_6	+	63	19	present	present	verified	27	antiSMASH
BGC0001988|c1|6-579|+|P174DRAFT_442171|hypothetical_protein|PKX92291.1	DTO1_FUN_006033-T1	95.3	149	7	0	1	149	1	149	3.28e-103	290	99.3	150	150	DTO1	BGC0001988	DTO1_FUN_006033	222011_1	3278765	3279315	scaffold_4	-	63	19	present	present	verified	27	antiSMASH
BGC0001988|c1|863-1660|+|P174DRAFT_371720|hypothetical_protein|PKX92292.1	DTO1_FUN_006032-T1	95.8	265	11	0	1	265	1	265	3.93e-188	514	100	265	265	DTO1	BGC0001988	DTO1_FUN_006032	222010_1	3277685	3278482	scaffold_4	-	63	19	present	present	verified	27	antiSMASH
BGC0001988|c1|1863-2373|+|P174DRAFT_407796|hypothetical_protein|PKX92293.1	DTO1_FUN_006031-T1	96	151	6	0	1	151	1	151	1.39e-109	306	100	151	151	DTO1	BGC0001988	DTO1_FUN_006031	222009_1	3276900	3277528	scaffold_4	-	63	19	present	present	verified	27	antiSMASH
BGC0001988|c1|2781-4443|+|P174DRAFT_372675|putative_cytochrome_P450_oxidoreductase|PKX92294.1	DTO1_FUN_006030-T1	95.1	515	22	1	1	515	2	513	0	1016	100	515	513	DTO1	BGC0001988	DTO1_FUN_006030	222008_1	3274913	3276578	scaffold_4	-	63	19	present	present	verified	27	antiSMASH
BGC0001988|c1|4666-5538|-|P174DRAFT_421366|putative_NADP(+)-dependent_dehydrogenase|PKX92295.1	DTO1_FUN_006029-T1	95.5	290	13	0	1	290	1	290	1.17e-197	541	100	290	290	DTO1	BGC0001988	DTO1_FUN_006029	222007_1	3273802	3274674	scaffold_4	+	63	19	present	present	verified	27	antiSMASH
BGC0001988|c1|6102-7842|-|P174DRAFT_373375|MFS_general_substrate_transporter|PKX92296.1	DTO1_FUN_006028-T1	97	502	15	0	1	502	56	557	0	952	99.2	506	560	DTO1	BGC0001988	DTO1_FUN_006028	222006_1	3271348	3273449	scaffold_4	+	63	19	present	present	verified	27	antiSMASH
BGC0001988|c1|8248-10694|+|P174DRAFT_512928|putative_fungal-specific_transcription_factor|PKX92297.1	DTO1_FUN_006027-T1	91	669	42	1	66	716	36	704	0	1224	90.9	716	704	DTO1	BGC0001988	DTO1_FUN_006027	222005_1	3267346	3271270	scaffold_4	-	63	19	present	present	verified	27	antiSMASH
BGC0001988|c1|10719-12358|-|P174DRAFT_512929|hypothetical_protein|PKX92298.1	DTO1_FUN_006026-T1	96.1	484	19	0	1	484	1	484	0	940	99.4	487	484	DTO1	BGC0001988	DTO1_FUN_006026	222004_1	3267029	3268655	scaffold_4	+	63	19	present	present	verified	27	antiSMASH
BGC0001988|c1|12693-14356|+|P174DRAFT_460883|FAD_binding_domain_protein|PKX92299.1	DTO1_FUN_006025-T1	88.4	533	33	2	1	504	1	533	0	943	100	504	533	DTO1	BGC0001988	DTO1_FUN_006025	222003_1	3265040	3266703	scaffold_4	-	63	19	present	present	verified	27	antiSMASH
BGC0001988|c1|14663-15457|-|P174DRAFT_460884|putative_hydroxysteroid_dehydrogenase|PKX92300.1	DTO1_FUN_006024-T1	98.5	264	4	0	1	264	1	264	1.12e-182	501	100	264	264	DTO1	BGC0001988	DTO1_FUN_006024	222002_1	3263930	3264724	scaffold_4	+	63	19	present	present	verified	27	antiSMASH
BGC0001988|c1|15742-16344|+|P174DRAFT_451670|putative_scytalone_dehydratase|PKX92301.1	DTO1_FUN_006023-T1	96.9	162	5	0	1	162	1	162	1.36e-119	333	100	162	162	DTO1	BGC0001988	DTO1_FUN_006023	222001_1	3263050	3263658	scaffold_4	-	63	19	present	present	verified	27	antiSMASH
BGC0001988|c1|16568-18000|-|P174DRAFT_512932|hypothetical_protein|PKX92302.1	DTO1_FUN_006022-T1	95.7	444	7	1	1	444	1	432	2.81e-298	808	100	444	432	DTO1	BGC0001988	DTO1_FUN_006022	222000_1	3261412	3262927	scaffold_4	+	63	19	present	present	verified	27	antiSMASH
BGC0001988|c1|18802-19725|-|P174DRAFT_512933|S-adenosyl-L-methionine-dependent_methyltransferase|PKX92303.1	DTO1_FUN_006021-T1	77.7	309	21	3	1	261	1	309	6.17e-167	462	100	261	309	DTO1	BGC0001988	DTO1_FUN_006021	221999_1	3259728	3260657	scaffold_4	+	63	19	present	present	verified	27	antiSMASH
BGC0001988|c1|20092-21461|+|P174DRAFT_512934|hypothetical_protein|PKX92304.1	DTO1_FUN_006020-T1	87.9	456	32	1	1	433	1	456	6.63e-300	812	100	433	456	DTO1	BGC0001988	DTO1_FUN_006020	221998_1	3258007	3259377	scaffold_4	-	63	19	present	present	verified	27	antiSMASH
BGC0001988|c1|21655-22240|-|P174DRAFT_372388|hypothetical_protein|PKX92305.1	DTO1_FUN_006019-T1	97.4	151	4	0	1	151	1	151	3.55e-112	313	100	151	151	DTO1	BGC0001988	DTO1_FUN_006019	221997_1	3257254	3257816	scaffold_4	+	63	19	present	present	verified	27	antiSMASH
BGC0001988|c1|22456-23007|+|P174DRAFT_373009|DUF1772-domain-containing_protein|PKX92306.1	DTO1_FUN_006018-T1	92	162	13	0	1	162	1	162	1.25e-106	300	100	162	162	DTO1	BGC0001988	DTO1_FUN_006018	221996_1	3256486	3257036	scaffold_4	-	63	19	present	present	verified	27	antiSMASH
BGC0001988|c1|23258-24391|-|P174DRAFT_460891|metallo-beta-lactamase_superfamily_protein|PKX92307.1	DTO1_FUN_006017-T1	96.4	309	11	0	1	309	1	309	1.21e-220	601	96	322	314	DTO1	BGC0001988	DTO1_FUN_006017	221995_1	3255115	3256120	scaffold_4	+	63	19	present	present	verified	27	antiSMASH
BGC0001988|c1|24740-30462|+|P174DRAFT_487776|putative_polyketide_synthase|PKX92308.1	DTO1_FUN_006016-T1	94.8	1824	59	4	1	1792	1	1821	0	3392	100	1792	1821	DTO1	BGC0001988	DTO1_FUN_006016	221994_1	3249081	3254779	scaffold_4	-	63	19	present	present	verified	27	antiSMASH
BGC0001988|c1|31035-32171|-|P174DRAFT_372038|hypothetical_protein|PKX92309.1	DTO1_FUN_006015-T1	91.5	378	32	0	1	378	1	378	9.91e-241	657	100	378	378	DTO1	BGC0001988	DTO1_FUN_006015	221993_1	3247480	3248616	scaffold_4	+	63	19	present	present	verified	27	antiSMASH
BGC0001988|c1|6-579|+|P174DRAFT_442171|hypothetical_protein|PKX92291.1	DTO2_FUN_008171-T1	94.6	149	8	0	1	149	1	149	1.28e-102	289	99.3	150	150	DTO2	BGC0001988	DTO2_FUN_008171	222011_1	75186	75731	scaffold_6	+	63	19	present	present	verified	27	antiSMASH
BGC0001988|c1|863-1660|+|P174DRAFT_371720|hypothetical_protein|PKX92292.1	DTO2_FUN_008172-T1	95.8	265	11	0	1	265	1	265	3.76e-188	514	100	265	265	DTO2	BGC0001988	DTO2_FUN_008172	222010_1	76014	76811	scaffold_6	+	63	19	present	present	verified	27	antiSMASH
BGC0001988|c1|1863-2373|+|P174DRAFT_407796|hypothetical_protein|PKX92293.1	DTO2_FUN_008173-T1	96	151	6	0	1	151	1	151	1.33e-109	306	100	151	151	DTO2	BGC0001988	DTO2_FUN_008173	222009_1	77006	77516	scaffold_6	+	63	19	present	present	verified	27	antiSMASH
BGC0001988|c1|2781-4443|+|P174DRAFT_372675|putative_cytochrome_P450_oxidoreductase|PKX92294.1	DTO2_FUN_008174-T1	94.8	515	24	1	1	515	2	513	0	1013	100	515	513	DTO2	BGC0001988	DTO2_FUN_008174	222008_1	77918	79583	scaffold_6	+	63	19	present	present	verified	27	antiSMASH
BGC0001988|c1|4666-5538|-|P174DRAFT_421366|putative_NADP(+)-dependent_dehydrogenase|PKX92295.1	DTO2_FUN_008175-T1	95.5	290	13	0	1	290	1	290	1.12e-197	541	100	290	290	DTO2	BGC0001988	DTO2_FUN_008175	222007_1	79822	80694	scaffold_6	-	63	19	present	present	verified	27	antiSMASH
BGC0001988|c1|6102-7842|-|P174DRAFT_373375|MFS_general_substrate_transporter|PKX92296.1	DTO2_FUN_008176-T1	96	253	10	0	250	502	1	253	3.07e-169	476	50	506	256	DTO2	BGC0001988	DTO2_FUN_008176	222006_1	81229	82052	scaffold_6	-	63	19	present	present	verified	27	antiSMASH
BGC0001988|c1|8248-10694|+|P174DRAFT_512928|putative_fungal-specific_transcription_factor|PKX92297.1	DTO2_FUN_008179-T1	90	402	22	1	333	716	1	402	4.56e-265	734	53.6	716	402	DTO2	BGC0001988	DTO2_FUN_008179	222005_1	84608	85816	scaffold_6	+	63	19	present	present	verified	27	antiSMASH
BGC0001988|c1|10719-12358|-|P174DRAFT_512929|hypothetical_protein|PKX92298.1	DTO2_FUN_008180-T1	95.9	484	20	0	1	484	1	484	0	942	99.4	487	484	DTO2	BGC0001988	DTO2_FUN_008180	222004_1	85840	87466	scaffold_6	-	63	19	present	present	verified	27	antiSMASH
BGC0001988|c1|12693-14356|+|P174DRAFT_460883|FAD_binding_domain_protein|PKX92299.1	DTO2_FUN_008181-T1	88.6	533	32	2	1	504	1	533	0	943	100	504	533	DTO2	BGC0001988	DTO2_FUN_008181	222003_1	87792	89455	scaffold_6	+	63	19	present	present	verified	27	antiSMASH
BGC0001988|c1|14663-15457|-|P174DRAFT_460884|putative_hydroxysteroid_dehydrogenase|PKX92300.1	DTO2_FUN_008182-T1	98.9	264	3	0	1	264	1	264	3.2e-184	504	100	264	264	DTO2	BGC0001988	DTO2_FUN_008182	222002_1	89770	90564	scaffold_6	-	63	19	present	present	verified	27	antiSMASH
BGC0001988|c1|15742-16344|+|P174DRAFT_451670|putative_scytalone_dehydratase|PKX92301.1	DTO2_FUN_008183-T1	96.9	162	5	0	1	162	1	162	1.3e-119	333	100	162	162	DTO2	BGC0001988	DTO2_FUN_008183	222001_1	90842	91444	scaffold_6	+	63	19	present	present	verified	27	antiSMASH
BGC0001988|c1|16568-18000|-|P174DRAFT_512932|hypothetical_protein|PKX92302.1	DTO2_FUN_008184-T1	95.4	434	8	1	1	434	1	422	1.65e-289	786	97.7	444	457	DTO2	BGC0001988	DTO2_FUN_008184	222000_1	91519	93088	scaffold_6	-	63	19	present	present	verified	27	antiSMASH
BGC0001988|c1|18802-19725|-|P174DRAFT_512933|S-adenosyl-L-methionine-dependent_methyltransferase|PKX92303.1	DTO2_FUN_008185-T1	77.7	309	21	3	1	261	1	309	5.92e-167	462	100	261	309	DTO2	BGC0001988	DTO2_FUN_008185	221999_1	93846	94775	scaffold_6	-	63	19	present	present	verified	27	antiSMASH
BGC0001988|c1|20092-21461|+|P174DRAFT_512934|hypothetical_protein|PKX92304.1	DTO2_FUN_008186-T1	87.5	456	34	1	1	433	1	456	7.41e-299	810	100	433	456	DTO2	BGC0001988	DTO2_FUN_008186	221998_1	95138	96508	scaffold_6	+	63	19	present	present	verified	27	antiSMASH
BGC0001988|c1|21655-22240|-|P174DRAFT_372388|hypothetical_protein|PKX92305.1	DTO2_FUN_008187-T1	98	151	3	0	1	151	1	151	1.19e-112	314	100	151	151	DTO2	BGC0001988	DTO2_FUN_008187	221997_1	96699	97261	scaffold_6	-	63	19	present	present	verified	27	antiSMASH
BGC0001988|c1|22456-23007|+|P174DRAFT_373009|DUF1772-domain-containing_protein|PKX92306.1	DTO2_FUN_008188-T1	92	162	13	0	1	162	1	162	1.2e-106	300	100	162	162	DTO2	BGC0001988	DTO2_FUN_008188	221996_1	97479	98029	scaffold_6	+	63	19	present	present	verified	27	antiSMASH
BGC0001988|c1|23258-24391|-|P174DRAFT_460891|metallo-beta-lactamase_superfamily_protein|PKX92307.1	DTO2_FUN_008189-T1	96.8	309	10	0	1	309	1	309	8.17e-221	602	96	322	314	DTO2	BGC0001988	DTO2_FUN_008189	221995_1	98395	99400	scaffold_6	-	63	19	present	present	verified	27	antiSMASH
BGC0001988|c1|24740-30462|+|P174DRAFT_487776|putative_polyketide_synthase|PKX92308.1	DTO2_FUN_008190-T1	94.7	1824	61	4	1	1792	1	1821	0	3390	100	1792	1821	DTO2	BGC0001988	DTO2_FUN_008190	221994_1	99736	105434	scaffold_6	+	63	19	present	present	verified	27	antiSMASH
BGC0001988|c1|31035-32171|-|P174DRAFT_372038|hypothetical_protein|PKX92309.1	DTO2_FUN_008191-T1	91.8	378	31	0	1	378	1	378	1.16e-241	659	100	378	378	DTO2	BGC0001988	DTO2_FUN_008191	221993_1	105900	107036	scaffold_6	-	63	19	present	present	verified	27	antiSMASH
BGC0001988|c1|6-579|+|P174DRAFT_442171|hypothetical_protein|PKX92291.1	DTO3_FUN_009226-T1	95.3	149	7	0	1	149	1	149	3.17e-103	290	99.3	150	150	DTO3	BGC0001988	DTO3_FUN_009226	222011_1	3380318	3380863	scaffold_6	-	63	19	present	present	verified	27	antiSMASH
BGC0001988|c1|863-1660|+|P174DRAFT_371720|hypothetical_protein|PKX92292.1	DTO3_FUN_009225-T1	95.8	265	11	0	1	265	1	265	3.79e-188	514	100	265	265	DTO3	BGC0001988	DTO3_FUN_009225	222010_1	3379238	3380035	scaffold_6	-	63	19	present	present	verified	27	antiSMASH
BGC0001988|c1|1863-2373|+|P174DRAFT_407796|hypothetical_protein|PKX92293.1	DTO3_FUN_009224-T1	96	151	6	0	1	151	1	151	1.34e-109	306	100	151	151	DTO3	BGC0001988	DTO3_FUN_009224	222009_1	3378533	3379043	scaffold_6	-	63	19	present	present	verified	27	antiSMASH
BGC0001988|c1|2781-4443|+|P174DRAFT_372675|putative_cytochrome_P450_oxidoreductase|PKX92294.1	DTO3_FUN_009223-T1	95.1	515	22	1	1	515	2	513	0	1017	100	515	513	DTO3	BGC0001988	DTO3_FUN_009223	222008_1	3376466	3378131	scaffold_6	-	63	19	present	present	verified	27	antiSMASH
BGC0001988|c1|4666-5538|-|P174DRAFT_421366|putative_NADP(+)-dependent_dehydrogenase|PKX92295.1	DTO3_FUN_009222-T1	95.9	290	12	0	1	290	1	290	5.58e-198	541	100	290	290	DTO3	BGC0001988	DTO3_FUN_009222	222007_1	3375354	3376226	scaffold_6	+	63	19	present	present	verified	27	antiSMASH
BGC0001988|c1|6102-7842|-|P174DRAFT_373375|MFS_general_substrate_transporter|PKX92296.1	DTO3_FUN_009221-T1	96.8	502	16	0	1	502	56	557	0	951	99.2	506	560	DTO3	BGC0001988	DTO3_FUN_009221	222006_1	3372917	3374936	scaffold_6	+	63	19	present	present	verified	27	antiSMASH
BGC0001988|c1|8248-10694|+|P174DRAFT_512928|putative_fungal-specific_transcription_factor|PKX92297.1	DTO3_FUN_009220-T1	91.3	669	40	1	66	716	36	704	0	1229	90.9	716	704	DTO3	BGC0001988	DTO3_FUN_009220	222005_1	3370232	3372552	scaffold_6	-	63	19	present	present	verified	27	antiSMASH
BGC0001988|c1|10719-12358|-|P174DRAFT_512929|hypothetical_protein|PKX92298.1	DTO3_FUN_009219-T1	96.1	484	19	0	1	484	1	484	0	943	99.4	487	484	DTO3	BGC0001988	DTO3_FUN_009219	222004_1	3368582	3370208	scaffold_6	+	63	19	present	present	verified	27	antiSMASH
BGC0001988|c1|12693-14356|+|P174DRAFT_460883|FAD_binding_domain_protein|PKX92299.1	DTO3_FUN_009218-T1	88.2	533	34	2	1	504	1	533	0	936	100	504	533	DTO3	BGC0001988	DTO3_FUN_009218	222003_1	3366593	3368256	scaffold_6	-	63	19	present	present	verified	27	antiSMASH
BGC0001988|c1|14663-15457|-|P174DRAFT_460884|putative_hydroxysteroid_dehydrogenase|PKX92300.1	DTO3_FUN_009217-T1	99.2	264	2	0	1	264	1	264	7.92e-185	506	100	264	264	DTO3	BGC0001988	DTO3_FUN_009217	222002_1	3365483	3366277	scaffold_6	+	63	19	present	present	verified	27	antiSMASH
BGC0001988|c1|15742-16344|+|P174DRAFT_451670|putative_scytalone_dehydratase|PKX92301.1	DTO3_FUN_009216-T1	85.8	183	5	1	1	162	1	183	2.07e-114	320	100	162	183	DTO3	BGC0001988	DTO3_FUN_009216	222001_1	3364603	3365205	scaffold_6	-	63	19	present	present	verified	27	antiSMASH
BGC0001988|c1|16568-18000|-|P174DRAFT_512932|hypothetical_protein|PKX92302.1	DTO3_FUN_009215-T1	94.8	346	6	1	99	444	1	334	1.03e-225	620	77.9	444	334	DTO3	BGC0001988	DTO3_FUN_009215	222000_1	3362963	3364680	scaffold_6	+	63	19	present	present	verified	27	antiSMASH
BGC0001988|c1|18802-19725|-|P174DRAFT_512933|S-adenosyl-L-methionine-dependent_methyltransferase|PKX92303.1	DTO3_FUN_009214-T1	77.7	309	21	3	1	261	1	309	5.96e-167	462	100	261	309	DTO3	BGC0001988	DTO3_FUN_009214	221999_1	3361281	3362521	scaffold_6	+	63	19	present	present	verified	27	antiSMASH
BGC0001988|c1|20092-21461|+|P174DRAFT_512934|hypothetical_protein|PKX92304.1	DTO3_FUN_009213-T1	87.9	456	32	1	1	433	1	456	6.4e-300	812	100	433	456	DTO3	BGC0001988	DTO3_FUN_009213	221998_1	3359556	3360926	scaffold_6	-	63	19	present	present	verified	27	antiSMASH
BGC0001988|c1|21655-22240|-|P174DRAFT_372388|hypothetical_protein|PKX92305.1	DTO3_FUN_009212-T1	98	151	3	0	1	151	1	151	1.19e-112	314	100	151	151	DTO3	BGC0001988	DTO3_FUN_009212	221997_1	3358803	3359365	scaffold_6	+	63	19	present	present	verified	27	antiSMASH
BGC0001988|c1|22456-23007|+|P174DRAFT_373009|DUF1772-domain-containing_protein|PKX92306.1	DTO3_FUN_009211-T1	92	162	13	0	1	162	1	162	1.2e-106	300	100	162	162	DTO3	BGC0001988	DTO3_FUN_009211	221996_1	3358035	3358585	scaffold_6	-	63	19	present	present	verified	27	antiSMASH
BGC0001988|c1|23258-24391|-|P174DRAFT_460891|metallo-beta-lactamase_superfamily_protein|PKX92307.1	DTO3_FUN_009210-T1	96.8	309	10	0	1	309	1	309	8.23e-221	602	96	322	314	DTO3	BGC0001988	DTO3_FUN_009210	221995_1	3356664	3357669	scaffold_6	+	63	19	present	present	verified	27	antiSMASH
BGC0001988|c1|24740-30462|+|P174DRAFT_487776|putative_polyketide_synthase|PKX92308.1	DTO3_FUN_009209-T1	94.8	1824	59	4	1	1792	1	1821	0	3392	100	1792	1821	DTO3	BGC0001988	DTO3_FUN_009209	221994_1	3350630	3356328	scaffold_6	-	63	19	present	present	verified	27	antiSMASH
BGC0001988|c1|31035-32171|-|P174DRAFT_372038|hypothetical_protein|PKX92309.1	DTO3_FUN_009208-T1	91.8	378	31	0	1	378	1	378	1.17e-241	659	100	378	378	DTO3	BGC0001988	DTO3_FUN_009208	221993_1	3349028	3350164	scaffold_6	+	63	19	present	present	verified	27	antiSMASH
BGC0001988|c1|6-579|+|P174DRAFT_442171|hypothetical_protein|PKX92291.1	DTO4_FUN_009234-T1	95.3	149	7	0	1	149	1	149	3.2e-103	290	99.3	150	150	DTO4	BGC0001988	DTO4_FUN_009234	222011_1	3361190	3361740	scaffold_6	-	63	19	present	present	verified	27	antiSMASH
BGC0001988|c1|863-1660|+|P174DRAFT_371720|hypothetical_protein|PKX92292.1	DTO4_FUN_009233-T1	95.8	265	11	0	1	265	1	265	3.82e-188	514	100	265	265	DTO4	BGC0001988	DTO4_FUN_009233	222010_1	3360110	3360907	scaffold_6	-	63	19	present	present	verified	27	antiSMASH
BGC0001988|c1|1863-2373|+|P174DRAFT_407796|hypothetical_protein|PKX92293.1	DTO4_FUN_009232-T1	96	151	6	0	1	151	1	151	1.35e-109	306	100	151	151	DTO4	BGC0001988	DTO4_FUN_009232	222009_1	3359405	3359915	scaffold_6	-	63	19	present	present	verified	27	antiSMASH
BGC0001988|c1|2781-4443|+|P174DRAFT_372675|putative_cytochrome_P450_oxidoreductase|PKX92294.1	DTO4_FUN_009231-T1	95.1	515	22	1	1	515	2	513	0	1017	100	515	513	DTO4	BGC0001988	DTO4_FUN_009231	222008_1	3357338	3359003	scaffold_6	-	63	19	present	present	verified	27	antiSMASH
BGC0001988|c1|4666-5538|-|P174DRAFT_421366|putative_NADP(+)-dependent_dehydrogenase|PKX92295.1	DTO4_FUN_009230-T1	95.9	290	12	0	1	290	1	290	5.63e-198	541	100	290	290	DTO4	BGC0001988	DTO4_FUN_009230	222007_1	3356214	3357098	scaffold_6	+	63	19	present	present	verified	27	antiSMASH
BGC0001988|c1|6102-7842|-|P174DRAFT_373375|MFS_general_substrate_transporter|PKX92296.1	DTO4_FUN_009229-T1	96.8	502	16	0	1	502	56	557	0	951	99.2	506	560	DTO4	BGC0001988	DTO4_FUN_009229	222006_1	3353789	3355691	scaffold_6	+	63	19	present	present	verified	27	antiSMASH
BGC0001988|c1|8248-10694|+|P174DRAFT_512928|putative_fungal-specific_transcription_factor|PKX92297.1	DTO4_FUN_009228-T1	91.3	669	40	1	66	716	36	704	0	1229	90.9	716	704	DTO4	BGC0001988	DTO4_FUN_009228	222005_1	3351104	3353420	scaffold_6	-	63	19	present	present	verified	27	antiSMASH
BGC0001988|c1|10719-12358|-|P174DRAFT_512929|hypothetical_protein|PKX92298.1	DTO4_FUN_009227-T1	93.9	495	19	1	1	484	1	495	0	935	99.4	487	495	DTO4	BGC0001988	DTO4_FUN_009227	222004_1	3349454	3351080	scaffold_6	+	63	19	present	present	verified	27	antiSMASH
BGC0001988|c1|12693-14356|+|P174DRAFT_460883|FAD_binding_domain_protein|PKX92299.1	DTO4_FUN_009226-T1	88.2	533	34	2	1	504	1	533	0	936	100	504	533	DTO4	BGC0001988	DTO4_FUN_009226	222003_1	3347465	3349128	scaffold_6	-	63	19	present	present	verified	27	antiSMASH
BGC0001988|c1|14663-15457|-|P174DRAFT_460884|putative_hydroxysteroid_dehydrogenase|PKX92300.1	DTO4_FUN_009225-T1	99.2	264	2	0	1	264	1	264	7.99e-185	506	100	264	264	DTO4	BGC0001988	DTO4_FUN_009225	222002_1	3346355	3347149	scaffold_6	+	63	19	present	present	verified	27	antiSMASH
BGC0001988|c1|15742-16344|+|P174DRAFT_451670|putative_scytalone_dehydratase|PKX92301.1	DTO4_FUN_009224-T1	85.8	183	5	1	1	162	1	183	2.09e-114	320	100	162	183	DTO4	BGC0001988	DTO4_FUN_009224	222001_1	3345475	3346077	scaffold_6	-	63	19	present	present	verified	27	antiSMASH
BGC0001988|c1|16568-18000|-|P174DRAFT_512932|hypothetical_protein|PKX92302.1	DTO4_FUN_009223-T1	95.3	444	8	2	1	444	1	431	5.92e-295	799	100	444	431	DTO4	BGC0001988	DTO4_FUN_009223	222000_1	3343837	3345271	scaffold_6	+	63	19	present	present	verified	27	antiSMASH
BGC0001988|c1|18802-19725|-|P174DRAFT_512933|S-adenosyl-L-methionine-dependent_methyltransferase|PKX92303.1	DTO4_FUN_009222-T1	77.7	309	21	3	1	261	1	309	6.01e-167	462	100	261	309	DTO4	BGC0001988	DTO4_FUN_009222	221999_1	3342153	3343082	scaffold_6	+	63	19	present	present	verified	27	antiSMASH
BGC0001988|c1|20092-21461|+|P174DRAFT_512934|hypothetical_protein|PKX92304.1	DTO4_FUN_009221-T1	87.9	456	32	1	1	433	1	456	6.46e-300	812	100	433	456	DTO4	BGC0001988	DTO4_FUN_009221	221998_1	3340428	3341798	scaffold_6	-	63	19	present	present	verified	27	antiSMASH
BGC0001988|c1|21655-22240|-|P174DRAFT_372388|hypothetical_protein|PKX92305.1	DTO4_FUN_009220-T1	98	151	3	0	1	151	1	151	1.2e-112	314	100	151	151	DTO4	BGC0001988	DTO4_FUN_009220	221997_1	3339675	3340237	scaffold_6	+	63	19	present	present	verified	27	antiSMASH
BGC0001988|c1|22456-23007|+|P174DRAFT_373009|DUF1772-domain-containing_protein|PKX92306.1	DTO4_FUN_009219-T1	92	162	13	0	1	162	1	162	1.21e-106	300	100	162	162	DTO4	BGC0001988	DTO4_FUN_009219	221996_1	3338907	3339457	scaffold_6	-	63	19	present	present	verified	27	antiSMASH
BGC0001988|c1|23258-24391|-|P174DRAFT_460891|metallo-beta-lactamase_superfamily_protein|PKX92307.1	DTO4_FUN_009218-T1	96.8	309	10	0	1	309	1	309	8.3e-221	602	96	322	314	DTO4	BGC0001988	DTO4_FUN_009218	221995_1	3337536	3338541	scaffold_6	+	63	19	present	present	verified	27	antiSMASH
BGC0001988|c1|24740-30462|+|P174DRAFT_487776|putative_polyketide_synthase|PKX92308.1	DTO4_FUN_009217-T1	94.8	1824	59	4	1	1792	1	1821	0	3392	100	1792	1821	DTO4	BGC0001988	DTO4_FUN_009217	221994_1	3331502	3337200	scaffold_6	-	63	19	present	present	verified	27	antiSMASH
BGC0001988|c1|31035-32171|-|P174DRAFT_372038|hypothetical_protein|PKX92309.1	DTO4_FUN_009216-T1	91.8	378	31	0	1	378	1	378	1.18e-241	659	100	378	378	DTO4	BGC0001988	DTO4_FUN_009216	221993_1	3329900	3331036	scaffold_6	+	63	19	present	present	verified	27	antiSMASH
BGC0001988|c1|6-579|+|P174DRAFT_442171|hypothetical_protein|PKX92291.1	DTO5_FUN_009242-T1	95.3	149	7	0	1	149	1	149	3.17e-103	290	99.3	150	150	DTO5	BGC0001988	DTO5_FUN_009242	222011_1	3372103	3373066	scaffold_6	-	63	19	present	present	verified	27	antiSMASH
BGC0001988|c1|863-1660|+|P174DRAFT_371720|hypothetical_protein|PKX92292.1	DTO5_FUN_009241-T1	95.8	265	11	0	1	265	1	265	3.79e-188	514	100	265	265	DTO5	BGC0001988	DTO5_FUN_009241	222010_1	3371249	3372046	scaffold_6	-	63	19	present	present	verified	27	antiSMASH
BGC0001988|c1|1863-2373|+|P174DRAFT_407796|hypothetical_protein|PKX92293.1	DTO5_FUN_009240-T1	96	151	6	0	1	151	1	151	1.34e-109	306	100	151	151	DTO5	BGC0001988	DTO5_FUN_009240	222009_1	3370460	3371097	scaffold_6	-	63	19	present	present	verified	27	antiSMASH
BGC0001988|c1|2781-4443|+|P174DRAFT_372675|putative_cytochrome_P450_oxidoreductase|PKX92294.1	DTO5_FUN_009239-T1	95.1	515	22	1	1	515	2	513	0	1017	100	515	513	DTO5	BGC0001988	DTO5_FUN_009239	222008_1	3368477	3370142	scaffold_6	-	63	19	present	present	verified	27	antiSMASH
BGC0001988|c1|4666-5538|-|P174DRAFT_421366|putative_NADP(+)-dependent_dehydrogenase|PKX92295.1	DTO5_FUN_009238-T1	95.9	290	12	0	1	290	1	290	5.58e-198	541	100	290	290	DTO5	BGC0001988	DTO5_FUN_009238	222007_1	3367365	3368237	scaffold_6	+	63	19	present	present	verified	27	antiSMASH
BGC0001988|c1|6102-7842|-|P174DRAFT_373375|MFS_general_substrate_transporter|PKX92296.1	DTO5_FUN_009237-T1	96.8	502	16	0	1	502	56	557	0	951	99.2	506	560	DTO5	BGC0001988	DTO5_FUN_009237	222006_1	3364928	3366963	scaffold_6	+	63	19	present	present	verified	27	antiSMASH
BGC0001988|c1|8248-10694|+|P174DRAFT_512928|putative_fungal-specific_transcription_factor|PKX92297.1	DTO5_FUN_009235-T1	91.4	477	23	1	258	716	1	477	0	885	64.1	716	477	DTO5	BGC0001988	DTO5_FUN_009235	222005_1	3361530	3364783	scaffold_6	-	63	19	present	present	verified	27	antiSMASH
BGC0001988|c1|10719-12358|-|P174DRAFT_512929|hypothetical_protein|PKX92298.1	DTO5_FUN_009234-T1	96.1	484	19	0	1	484	1	484	0	943	99.4	487	484	DTO5	BGC0001988	DTO5_FUN_009234	222004_1	3360593	3362219	scaffold_6	+	63	19	present	present	verified	27	antiSMASH
BGC0001988|c1|12693-14356|+|P174DRAFT_460883|FAD_binding_domain_protein|PKX92299.1	DTO5_FUN_009233-T1	88.2	533	34	2	1	504	1	533	0	936	100	504	533	DTO5	BGC0001988	DTO5_FUN_009233	222003_1	3358604	3360267	scaffold_6	-	63	19	present	present	verified	27	antiSMASH
BGC0001988|c1|14663-15457|-|P174DRAFT_460884|putative_hydroxysteroid_dehydrogenase|PKX92300.1	DTO5_FUN_009232-T1	99.2	264	2	0	1	264	1	264	7.92e-185	506	100	264	264	DTO5	BGC0001988	DTO5_FUN_009232	222002_1	3357457	3358288	scaffold_6	+	63	19	present	present	verified	27	antiSMASH
BGC0001988|c1|15742-16344|+|P174DRAFT_451670|putative_scytalone_dehydratase|PKX92301.1	DTO5_FUN_009231-T1	85.8	183	5	1	1	162	1	183	2.07e-114	320	100	162	183	DTO5	BGC0001988	DTO5_FUN_009231	222001_1	3356614	3357216	scaffold_6	-	63	19	present	present	verified	27	antiSMASH
BGC0001988|c1|16568-18000|-|P174DRAFT_512932|hypothetical_protein|PKX92302.1	DTO5_FUN_009230-T1	94.8	346	6	1	99	444	1	334	1.03e-225	620	77.9	444	334	DTO5	BGC0001988	DTO5_FUN_009230	222000_1	3354803	3356799	scaffold_6	+	63	19	present	present	verified	27	antiSMASH
BGC0001988|c1|18802-19725|-|P174DRAFT_512933|S-adenosyl-L-methionine-dependent_methyltransferase|PKX92303.1	DTO5_FUN_009229-T1	77.7	309	21	3	1	261	1	309	5.95e-167	462	100	261	309	DTO5	BGC0001988	DTO5_FUN_009229	221999_1	3353292	3354221	scaffold_6	+	63	19	present	present	verified	27	antiSMASH
BGC0001988|c1|20092-21461|+|P174DRAFT_512934|hypothetical_protein|PKX92304.1	DTO5_FUN_009228-T1	87.9	456	32	1	1	433	1	456	6.4e-300	812	100	433	456	DTO5	BGC0001988	DTO5_FUN_009228	221998_1	3351567	3352937	scaffold_6	-	63	19	present	present	verified	27	antiSMASH
BGC0001988|c1|21655-22240|-|P174DRAFT_372388|hypothetical_protein|PKX92305.1	DTO5_FUN_009227-T1	98	151	3	0	1	151	1	151	1.19e-112	314	100	151	151	DTO5	BGC0001988	DTO5_FUN_009227	221997_1	3350814	3351376	scaffold_6	+	63	19	present	present	verified	27	antiSMASH
BGC0001988|c1|22456-23007|+|P174DRAFT_373009|DUF1772-domain-containing_protein|PKX92306.1	DTO5_FUN_009226-T1	92	162	13	0	1	162	1	162	1.2e-106	300	100	162	162	DTO5	BGC0001988	DTO5_FUN_009226	221996_1	3350046	3350596	scaffold_6	-	63	19	present	present	verified	27	antiSMASH
BGC0001988|c1|23258-24391|-|P174DRAFT_460891|metallo-beta-lactamase_superfamily_protein|PKX92307.1	DTO5_FUN_009225-T1	96.8	309	10	0	1	309	1	309	8.22e-221	602	96	322	314	DTO5	BGC0001988	DTO5_FUN_009225	221995_1	3348675	3349680	scaffold_6	+	63	19	present	present	verified	27	antiSMASH
BGC0001988|c1|24740-30462|+|P174DRAFT_487776|putative_polyketide_synthase|PKX92308.1	DTO5_FUN_009224-T1	94.8	1824	59	4	1	1792	1	1821	0	3392	100	1792	1821	DTO5	BGC0001988	DTO5_FUN_009224	221994_1	3342641	3348339	scaffold_6	-	63	19	present	present	verified	27	antiSMASH
BGC0001988|c1|31035-32171|-|P174DRAFT_372038|hypothetical_protein|PKX92309.1	DTO5_FUN_009223-T1	91.8	378	31	0	1	378	1	378	1.17e-241	659	100	378	378	DTO5	BGC0001988	DTO5_FUN_009223	221993_1	3341039	3342175	scaffold_6	+	63	19	present	present	verified	27	antiSMASH
BGC0001988|c1|6-579|+|P174DRAFT_442171|hypothetical_protein|PKX92291.1	DTO6_FUN_009345-T1	95.3	149	7	0	1	149	1	149	3.2e-103	290	99.3	150	150	DTO6	BGC0001988	DTO6_FUN_009345	222011_1	3367877	3368823	scaffold_6	-	63	19	present	present	verified	27	antiSMASH
BGC0001988|c1|863-1660|+|P174DRAFT_371720|hypothetical_protein|PKX92292.1	DTO6_FUN_009344-T1	95.8	265	11	0	1	265	1	265	3.82e-188	514	100	265	265	DTO6	BGC0001988	DTO6_FUN_009344	222010_1	3367042	3367839	scaffold_6	-	63	19	present	present	verified	27	antiSMASH
BGC0001988|c1|1863-2373|+|P174DRAFT_407796|hypothetical_protein|PKX92293.1	DTO6_FUN_009343-T1	96	151	6	0	1	151	1	151	1.35e-109	306	100	151	151	DTO6	BGC0001988	DTO6_FUN_009343	222009_1	3366257	3366891	scaffold_6	-	63	19	present	present	verified	27	antiSMASH
BGC0001988|c1|2781-4443|+|P174DRAFT_372675|putative_cytochrome_P450_oxidoreductase|PKX92294.1	DTO6_FUN_009342-T1	95.1	515	22	1	1	515	2	513	0	1017	100	515	513	DTO6	BGC0001988	DTO6_FUN_009342	222008_1	3364270	3365935	scaffold_6	-	63	19	present	present	verified	27	antiSMASH
BGC0001988|c1|4666-5538|-|P174DRAFT_421366|putative_NADP(+)-dependent_dehydrogenase|PKX92295.1	DTO6_FUN_009341-T1	95.9	290	12	0	1	290	1	290	5.62e-198	541	100	290	290	DTO6	BGC0001988	DTO6_FUN_009341	222007_1	3363158	3364030	scaffold_6	+	63	19	present	present	verified	27	antiSMASH
BGC0001988|c1|6102-7842|-|P174DRAFT_373375|MFS_general_substrate_transporter|PKX92296.1	DTO6_FUN_009340-T1	96.8	502	16	0	1	502	56	557	0	951	99.2	506	560	DTO6	BGC0001988	DTO6_FUN_009340	222006_1	3360553	3362740	scaffold_6	+	63	19	present	present	verified	27	antiSMASH
BGC0001988|c1|8248-10694|+|P174DRAFT_512928|putative_fungal-specific_transcription_factor|PKX92297.1	DTO6_FUN_009339-T1	91.3	669	40	1	66	716	36	704	0	1229	90.9	716	704	DTO6	BGC0001988	DTO6_FUN_009339	222005_1	3356591	3360524	scaffold_6	-	63	19	present	present	verified	27	antiSMASH
BGC0001988|c1|10719-12358|-|P174DRAFT_512929|hypothetical_protein|PKX92298.1	DTO6_FUN_009338-T1	96.1	484	19	0	1	484	1	484	0	943	99.4	487	484	DTO6	BGC0001988	DTO6_FUN_009338	222004_1	3356386	3358012	scaffold_6	+	63	19	present	present	verified	27	antiSMASH
BGC0001988|c1|12693-14356|+|P174DRAFT_460883|FAD_binding_domain_protein|PKX92299.1	DTO6_FUN_009337-T1	88.2	533	34	2	1	504	1	533	0	936	100	504	533	DTO6	BGC0001988	DTO6_FUN_009337	222003_1	3354397	3356060	scaffold_6	-	63	19	present	present	verified	27	antiSMASH
BGC0001988|c1|14663-15457|-|P174DRAFT_460884|putative_hydroxysteroid_dehydrogenase|PKX92300.1	DTO6_FUN_009336-T1	99.2	264	2	0	1	264	1	264	7.99e-185	506	100	264	264	DTO6	BGC0001988	DTO6_FUN_009336	222002_1	3353287	3354081	scaffold_6	+	63	19	present	present	verified	27	antiSMASH
BGC0001988|c1|15742-16344|+|P174DRAFT_451670|putative_scytalone_dehydratase|PKX92301.1	DTO6_FUN_009335-T1	85.8	183	5	1	1	162	1	183	2.09e-114	320	100	162	183	DTO6	BGC0001988	DTO6_FUN_009335	222001_1	3352407	3353009	scaffold_6	-	63	19	present	present	verified	27	antiSMASH
BGC0001988|c1|16568-18000|-|P174DRAFT_512932|hypothetical_protein|PKX92302.1	DTO6_FUN_009334-T1	95.3	444	8	2	1	444	1	431	5.92e-295	799	100	444	431	DTO6	BGC0001988	DTO6_FUN_009334	222000_1	3350721	3352794	scaffold_6	+	63	19	present	present	verified	27	antiSMASH
BGC0001988|c1|18802-19725|-|P174DRAFT_512933|S-adenosyl-L-methionine-dependent_methyltransferase|PKX92303.1	DTO6_FUN_009333-T1	77.7	309	21	3	1	261	1	309	6.01e-167	462	100	261	309	DTO6	BGC0001988	DTO6_FUN_009333	221999_1	3349085	3350014	scaffold_6	+	63	19	present	present	verified	27	antiSMASH
BGC0001988|c1|20092-21461|+|P174DRAFT_512934|hypothetical_protein|PKX92304.1	DTO6_FUN_009332-T1	87.9	456	32	1	1	433	1	456	6.46e-300	812	100	433	456	DTO6	BGC0001988	DTO6_FUN_009332	221998_1	3347360	3348730	scaffold_6	-	63	19	present	present	verified	27	antiSMASH
BGC0001988|c1|21655-22240|-|P174DRAFT_372388|hypothetical_protein|PKX92305.1	DTO6_FUN_009331-T1	98	151	3	0	1	151	1	151	1.2e-112	314	100	151	151	DTO6	BGC0001988	DTO6_FUN_009331	221997_1	3346607	3347169	scaffold_6	+	63	19	present	present	verified	27	antiSMASH
BGC0001988|c1|22456-23007|+|P174DRAFT_373009|DUF1772-domain-containing_protein|PKX92306.1	DTO6_FUN_009330-T1	92	162	13	0	1	162	1	162	1.21e-106	300	100	162	162	DTO6	BGC0001988	DTO6_FUN_009330	221996_1	3345839	3346389	scaffold_6	-	63	19	present	present	verified	27	antiSMASH
BGC0001988|c1|23258-24391|-|P174DRAFT_460891|metallo-beta-lactamase_superfamily_protein|PKX92307.1	DTO6_FUN_009329-T1	96.8	309	10	0	1	309	1	309	8.3e-221	602	96	322	314	DTO6	BGC0001988	DTO6_FUN_009329	221995_1	3344468	3345473	scaffold_6	+	63	19	present	present	verified	27	antiSMASH
BGC0001988|c1|24740-30462|+|P174DRAFT_487776|putative_polyketide_synthase|PKX92308.1	DTO6_FUN_009328-T1	94.8	1824	59	4	1	1792	1	1821	0	3392	100	1792	1821	DTO6	BGC0001988	DTO6_FUN_009328	221994_1	3338434	3344132	scaffold_6	-	63	19	present	present	verified	27	antiSMASH
BGC0001988|c1|31035-32171|-|P174DRAFT_372038|hypothetical_protein|PKX92309.1	DTO6_FUN_009327-T1	91.8	378	31	0	1	378	1	378	1.18e-241	659	100	378	378	DTO6	BGC0001988	DTO6_FUN_009327	221993_1	3336832	3337968	scaffold_6	+	63	19	present	present	verified	27	antiSMASH
BGC0001988|c1|6-579|+|P174DRAFT_442171|hypothetical_protein|PKX92291.1	DTO7_FUN_009276-T1	95.3	149	7	0	1	149	1	149	3.18e-103	290	99.3	150	150	DTO7	BGC0001988	DTO7_FUN_009276	222011_1	3365127	3366162	scaffold_6	-	63	19	present	present	verified	27	antiSMASH
BGC0001988|c1|863-1660|+|P174DRAFT_371720|hypothetical_protein|PKX92292.1	DTO7_FUN_009275-T1	95.8	265	11	0	1	265	1	265	3.81e-188	514	100	265	265	DTO7	BGC0001988	DTO7_FUN_009275	222010_1	3364380	3365177	scaffold_6	-	63	19	present	present	verified	27	antiSMASH
BGC0001988|c1|1863-2373|+|P174DRAFT_407796|hypothetical_protein|PKX92293.1	DTO7_FUN_009274-T1	96	151	6	0	1	151	1	151	1.35e-109	306	100	151	151	DTO7	BGC0001988	DTO7_FUN_009274	222009_1	3363646	3364245	scaffold_6	-	63	19	present	present	verified	27	antiSMASH
BGC0001988|c1|2781-4443|+|P174DRAFT_372675|putative_cytochrome_P450_oxidoreductase|PKX92294.1	DTO7_FUN_009273-T1	95.1	515	22	1	1	515	2	513	0	1017	100	515	513	DTO7	BGC0001988	DTO7_FUN_009273	222008_1	3361608	3363273	scaffold_6	-	63	19	present	present	verified	27	antiSMASH
BGC0001988|c1|4666-5538|-|P174DRAFT_421366|putative_NADP(+)-dependent_dehydrogenase|PKX92295.1	DTO7_FUN_009272-T1	95.5	290	13	0	1	290	1	290	7.96e-198	541	100	290	290	DTO7	BGC0001988	DTO7_FUN_009272	222007_1	3360497	3361369	scaffold_6	+	63	19	present	present	verified	27	antiSMASH
BGC0001988|c1|6102-7842|-|P174DRAFT_373375|MFS_general_substrate_transporter|PKX92296.1	DTO7_FUN_009271-T1	97	502	15	0	1	502	57	558	0	952	99.2	506	561	DTO7	BGC0001988	DTO7_FUN_009271	222006_1	3357877	3360076	scaffold_6	+	63	19	present	present	verified	27	antiSMASH
BGC0001988|c1|8248-10694|+|P174DRAFT_512928|putative_fungal-specific_transcription_factor|PKX92297.1	DTO7_FUN_009270-T1	91	669	42	1	66	716	36	704	0	1226	90.9	716	704	DTO7	BGC0001988	DTO7_FUN_009270	222005_1	3354022	3357944	scaffold_6	-	63	19	present	present	verified	27	antiSMASH
BGC0001988|c1|10719-12358|-|P174DRAFT_512929|hypothetical_protein|PKX92298.1	DTO7_FUN_009268-T1	94.9	313	16	0	1	313	1	313	1.19e-215	597	64.3	487	338	DTO7	BGC0001988	DTO7_FUN_009268	222004_1	3353722	3354806	scaffold_6	+	63	19	present	present	verified	27	antiSMASH
BGC0001988|c1|12693-14356|+|P174DRAFT_460883|FAD_binding_domain_protein|PKX92299.1	DTO7_FUN_009267-T1	88.6	533	32	2	1	504	1	533	0	944	100	504	533	DTO7	BGC0001988	DTO7_FUN_009267	222003_1	3351733	3353396	scaffold_6	-	63	19	present	present	verified	27	antiSMASH
BGC0001988|c1|14663-15457|-|P174DRAFT_460884|putative_hydroxysteroid_dehydrogenase|PKX92300.1	DTO7_FUN_009266-T1	98.9	264	3	0	1	264	1	264	1.32e-183	503	100	264	264	DTO7	BGC0001988	DTO7_FUN_009266	222002_1	3350623	3351417	scaffold_6	+	63	19	present	present	verified	27	antiSMASH
BGC0001988|c1|15742-16344|+|P174DRAFT_451670|putative_scytalone_dehydratase|PKX92301.1	DTO7_FUN_009264-T1	96.1	103	4	0	60	162	1	103	3.91e-72	211	63.6	162	103	DTO7	BGC0001988	DTO7_FUN_009264	222001_1	3349573	3350055	scaffold_6	-	63	19	present	present	verified	27	antiSMASH
BGC0001988|c1|16568-18000|-|P174DRAFT_512932|hypothetical_protein|PKX92302.1	DTO7_FUN_009263-T1	95.1	346	5	1	99	444	1	334	2.55e-226	622	77.9	444	334	DTO7	BGC0001988	DTO7_FUN_009263	222000_1	3347841	3349611	scaffold_6	+	63	19	present	present	verified	27	antiSMASH
BGC0001988|c1|18802-19725|-|P174DRAFT_512933|S-adenosyl-L-methionine-dependent_methyltransferase|PKX92303.1	DTO7_FUN_009262-T1	77.3	309	22	3	1	261	1	309	2.43e-166	461	100	261	309	DTO7	BGC0001988	DTO7_FUN_009262	221999_1	3346416	3347345	scaffold_6	+	63	19	present	present	verified	27	antiSMASH
BGC0001988|c1|20092-21461|+|P174DRAFT_512934|hypothetical_protein|PKX92304.1	DTO7_FUN_009261-T1	87.9	456	32	1	1	433	1	456	6.43e-300	812	100	433	456	DTO7	BGC0001988	DTO7_FUN_009261	221998_1	3344683	3346053	scaffold_6	-	63	19	present	present	verified	27	antiSMASH
BGC0001988|c1|21655-22240|-|P174DRAFT_372388|hypothetical_protein|PKX92305.1	DTO7_FUN_009260-T1	98	151	3	0	1	151	1	151	1.2e-112	314	100	151	151	DTO7	BGC0001988	DTO7_FUN_009260	221997_1	3343930	3344492	scaffold_6	+	63	19	present	present	verified	27	antiSMASH
BGC0001988|c1|22456-23007|+|P174DRAFT_373009|DUF1772-domain-containing_protein|PKX92306.1	DTO7_FUN_009259-T1	91.4	162	14	0	1	162	1	162	7e-106	298	100	162	162	DTO7	BGC0001988	DTO7_FUN_009259	221996_1	3343163	3343712	scaffold_6	-	63	19	present	present	verified	27	antiSMASH
BGC0001988|c1|23258-24391|-|P174DRAFT_460891|metallo-beta-lactamase_superfamily_protein|PKX92307.1	DTO7_FUN_009258-T1	96.8	309	10	0	1	309	1	309	8.26e-221	602	96	322	314	DTO7	BGC0001988	DTO7_FUN_009258	221995_1	3341793	3342798	scaffold_6	+	63	19	present	present	verified	27	antiSMASH
BGC0001988|c1|24740-30462|+|P174DRAFT_487776|putative_polyketide_synthase|PKX92308.1	DTO7_FUN_009257-T1	94.8	1824	60	4	1	1792	1	1821	0	3390	100	1792	1821	DTO7	BGC0001988	DTO7_FUN_009257	221994_1	3335759	3341457	scaffold_6	-	63	19	present	present	verified	27	antiSMASH
BGC0001988|c1|31035-32171|-|P174DRAFT_372038|hypothetical_protein|PKX92309.1	DTO7_FUN_009256-T1	90.7	378	35	0	1	378	1	378	3.06e-237	648	100	378	378	DTO7	BGC0001988	DTO7_FUN_009256	221993_1	3334157	3335293	scaffold_6	+	63	19	present	present	verified	27	antiSMASH
BGC0001988|c1|6-579|+|P174DRAFT_442171|hypothetical_protein|PKX92291.1	DTO8_FUN_007704-T1	94	149	9	0	1	149	1	149	4.56e-101	285	99.3	150	150	DTO8	BGC0001988	DTO8_FUN_007704	222011_1	3319037	3319582	scaffold_5	-	63	19	present	present	verified	27	antiSMASH
BGC0001988|c1|863-1660|+|P174DRAFT_371720|hypothetical_protein|PKX92292.1	DTO8_FUN_007703-T1	95.5	265	12	0	1	265	1	265	1.34e-186	511	100	265	265	DTO8	BGC0001988	DTO8_FUN_007703	222010_1	3317956	3318753	scaffold_5	-	63	19	present	present	verified	27	antiSMASH
BGC0001988|c1|1863-2373|+|P174DRAFT_407796|hypothetical_protein|PKX92293.1	DTO8_FUN_007702-T1	95.4	151	7	0	1	151	1	151	2.01e-109	306	100	151	151	DTO8	BGC0001988	DTO8_FUN_007702	222009_1	3317251	3317761	scaffold_5	-	63	19	present	present	verified	27	antiSMASH
BGC0001988|c1|2781-4443|+|P174DRAFT_372675|putative_cytochrome_P450_oxidoreductase|PKX92294.1	DTO8_FUN_007701-T1	95.3	515	21	1	1	515	2	513	0	1019	100	515	513	DTO8	BGC0001988	DTO8_FUN_007701	222008_1	3315184	3316849	scaffold_5	-	63	19	present	present	verified	27	antiSMASH
BGC0001988|c1|4666-5538|-|P174DRAFT_421366|putative_NADP(+)-dependent_dehydrogenase|PKX92295.1	DTO8_FUN_007700-T1	95.2	290	14	0	1	290	1	290	2.4e-197	540	100	290	290	DTO8	BGC0001988	DTO8_FUN_007700	222007_1	3314074	3314946	scaffold_5	+	63	19	present	present	verified	27	antiSMASH
BGC0001988|c1|6102-7842|-|P174DRAFT_373375|MFS_general_substrate_transporter|PKX92296.1	DTO8_FUN_007699-T1	96.8	502	16	0	1	502	55	556	0	951	99.2	506	559	DTO8	BGC0001988	DTO8_FUN_007699	222006_1	3311562	3313536	scaffold_5	+	63	19	present	present	verified	27	antiSMASH
BGC0001988|c1|8248-10694|+|P174DRAFT_512928|putative_fungal-specific_transcription_factor|PKX92297.1	DTO8_FUN_007698-T1	91	669	42	1	66	716	36	704	0	1224	90.9	716	704	DTO8	BGC0001988	DTO8_FUN_007698	222005_1	3307546	3311271	scaffold_5	-	63	19	present	present	verified	27	antiSMASH
BGC0001988|c1|10719-12358|-|P174DRAFT_512929|hypothetical_protein|PKX92298.1	DTO8_FUN_007697-T1	96.1	484	19	0	1	484	1	484	0	939	99.4	487	484	DTO8	BGC0001988	DTO8_FUN_007697	222004_1	3307301	3308927	scaffold_5	+	63	19	present	present	verified	27	antiSMASH
BGC0001988|c1|12693-14356|+|P174DRAFT_460883|FAD_binding_domain_protein|PKX92299.1	DTO8_FUN_007696-T1	88.6	533	32	2	1	504	1	533	0	944	100	504	533	DTO8	BGC0001988	DTO8_FUN_007696	222003_1	3305312	3306975	scaffold_5	-	63	19	present	present	verified	27	antiSMASH
BGC0001988|c1|14663-15457|-|P174DRAFT_460884|putative_hydroxysteroid_dehydrogenase|PKX92300.1	DTO8_FUN_007695-T1	99.2	264	2	0	1	264	1	264	8.35e-185	506	100	264	264	DTO8	BGC0001988	DTO8_FUN_007695	222002_1	3304202	3304996	scaffold_5	+	63	19	present	present	verified	27	antiSMASH
BGC0001988|c1|15742-16344|+|P174DRAFT_451670|putative_scytalone_dehydratase|PKX92301.1	DTO8_FUN_007694-T1	85.8	183	5	1	1	162	1	183	2.19e-114	320	100	162	183	DTO8	BGC0001988	DTO8_FUN_007694	222001_1	3303322	3303924	scaffold_5	-	63	19	present	present	verified	27	antiSMASH
BGC0001988|c1|16568-18000|-|P174DRAFT_512932|hypothetical_protein|PKX92302.1	DTO8_FUN_007693-T1	94.5	346	7	1	99	444	1	334	6.29e-225	618	77.9	444	334	DTO8	BGC0001988	DTO8_FUN_007693	222000_1	3301718	3303110	scaffold_5	+	63	19	present	present	verified	27	antiSMASH
BGC0001988|c1|18802-19725|-|P174DRAFT_512933|S-adenosyl-L-methionine-dependent_methyltransferase|PKX92303.1	DTO8_FUN_007692-T1	77.3	309	22	3	1	261	1	309	1.8e-166	461	100	261	309	DTO8	BGC0001988	DTO8_FUN_007692	221999_1	3299972	3300901	scaffold_5	+	63	19	present	present	verified	27	antiSMASH
BGC0001988|c1|20092-21461|+|P174DRAFT_512934|hypothetical_protein|PKX92304.1	DTO8_FUN_007691-T1	88.6	456	29	1	1	433	1	456	2.87e-301	816	100	433	456	DTO8	BGC0001988	DTO8_FUN_007691	221998_1	3298227	3299657	scaffold_5	-	63	19	present	present	verified	27	antiSMASH
BGC0001988|c1|21655-22240|-|P174DRAFT_372388|hypothetical_protein|PKX92305.1	DTO8_FUN_007690-T1	98	151	3	0	1	151	1	151	1.26e-112	314	100	151	151	DTO8	BGC0001988	DTO8_FUN_007690	221997_1	3297482	3298044	scaffold_5	+	63	19	present	present	verified	27	antiSMASH
BGC0001988|c1|22456-23007|+|P174DRAFT_373009|DUF1772-domain-containing_protein|PKX92306.1	DTO8_FUN_007689-T1	90.7	162	15	0	1	162	1	162	4.97e-104	293	100	162	162	DTO8	BGC0001988	DTO8_FUN_007689	221996_1	3296714	3297264	scaffold_5	-	63	19	present	present	verified	27	antiSMASH
BGC0001988|c1|23258-24391|-|P174DRAFT_460891|metallo-beta-lactamase_superfamily_protein|PKX92307.1	DTO8_FUN_007688-T1	97.7	309	7	0	1	309	1	309	3.16e-223	608	96	322	314	DTO8	BGC0001988	DTO8_FUN_007688	221995_1	3295344	3296349	scaffold_5	+	63	19	present	present	verified	27	antiSMASH
BGC0001988|c1|24740-30462|+|P174DRAFT_487776|putative_polyketide_synthase|PKX92308.1	DTO8_FUN_007687-T1	94.7	1824	62	4	1	1792	1	1821	0	3383	100	1792	1821	DTO8	BGC0001988	DTO8_FUN_007687	221994_1	3289310	3295008	scaffold_5	-	63	19	present	present	verified	27	antiSMASH
BGC0001988|c1|31035-32171|-|P174DRAFT_372038|hypothetical_protein|PKX92309.1	DTO8_FUN_007686-T1	90.5	378	36	0	1	378	1	378	2.76e-238	651	100	378	378	DTO8	BGC0001988	DTO8_FUN_007686	221993_1	3287708	3288844	scaffold_5	+	63	19	present	present	verified	27	antiSMASH
BGC0001988|c1|6-579|+|P174DRAFT_442171|hypothetical_protein|PKX92291.1	DTO9_FUN_008287-T1	95.3	149	7	0	1	149	1	149	3.22e-103	290	99.3	150	150	DTO9	BGC0001988	DTO9_FUN_008287	222011_1	86453	87154	scaffold_6	+	63	19	present	present	verified	27	antiSMASH
BGC0001988|c1|863-1660|+|P174DRAFT_371720|hypothetical_protein|PKX92292.1	DTO9_FUN_008288-T1	95.5	265	12	0	1	265	1	265	2.23e-187	513	100	265	265	DTO9	BGC0001988	DTO9_FUN_008288	222010_1	87437	88234	scaffold_6	+	63	19	present	present	verified	27	antiSMASH
BGC0001988|c1|1863-2373|+|P174DRAFT_407796|hypothetical_protein|PKX92293.1	DTO9_FUN_008289-T1	96	151	6	0	1	151	1	151	1.36e-109	306	100	151	151	DTO9	BGC0001988	DTO9_FUN_008289	222009_1	88389	89020	scaffold_6	+	63	19	present	present	verified	27	antiSMASH
BGC0001988|c1|2781-4443|+|P174DRAFT_372675|putative_cytochrome_P450_oxidoreductase|PKX92294.1	DTO9_FUN_008290-T1	95	515	23	1	1	515	2	513	0	1012	100	515	513	DTO9	BGC0001988	DTO9_FUN_008290	222008_1	89341	91006	scaffold_6	+	63	19	present	present	verified	27	antiSMASH
BGC0001988|c1|4666-5538|-|P174DRAFT_421366|putative_NADP(+)-dependent_dehydrogenase|PKX92295.1	DTO9_FUN_008291-T1	95.5	290	13	0	1	290	1	290	1.14e-197	541	100	290	290	DTO9	BGC0001988	DTO9_FUN_008291	222007_1	91245	92117	scaffold_6	-	63	19	present	present	verified	27	antiSMASH
BGC0001988|c1|6102-7842|-|P174DRAFT_373375|MFS_general_substrate_transporter|PKX92296.1	DTO9_FUN_008292-T1	97	502	15	0	1	502	56	557	0	952	99.2	506	560	DTO9	BGC0001988	DTO9_FUN_008292	222006_1	92533	94554	scaffold_6	-	63	19	present	present	verified	27	antiSMASH
BGC0001988|c1|8248-10694|+|P174DRAFT_512928|putative_fungal-specific_transcription_factor|PKX92297.1	DTO9_FUN_008293-T1	91	669	42	1	66	716	36	704	0	1224	90.9	716	704	DTO9	BGC0001988	DTO9_FUN_008293	222005_1	94703	98559	scaffold_6	+	63	19	present	present	verified	27	antiSMASH
BGC0001988|c1|10719-12358|-|P174DRAFT_512929|hypothetical_protein|PKX92298.1	DTO9_FUN_008294-T1	96.1	484	19	0	1	484	1	484	0	940	99.4	487	484	DTO9	BGC0001988	DTO9_FUN_008294	222004_1	97264	98890	scaffold_6	-	63	19	present	present	verified	27	antiSMASH
BGC0001988|c1|12693-14356|+|P174DRAFT_460883|FAD_binding_domain_protein|PKX92299.1	DTO9_FUN_008295-T1	88.4	533	33	2	1	504	1	533	0	943	100	504	533	DTO9	BGC0001988	DTO9_FUN_008295	222003_1	99216	100879	scaffold_6	+	63	19	present	present	verified	27	antiSMASH
BGC0001988|c1|14663-15457|-|P174DRAFT_460884|putative_hydroxysteroid_dehydrogenase|PKX92300.1	DTO9_FUN_008296-T1	98.5	264	4	0	1	264	1	264	1.1e-182	501	100	264	264	DTO9	BGC0001988	DTO9_FUN_008296	222002_1	101195	101989	scaffold_6	-	63	19	present	present	verified	27	antiSMASH
BGC0001988|c1|15742-16344|+|P174DRAFT_451670|putative_scytalone_dehydratase|PKX92301.1	DTO9_FUN_008297-T1	96.9	162	5	0	1	162	1	162	1.33e-119	333	100	162	162	DTO9	BGC0001988	DTO9_FUN_008297	222001_1	102267	102869	scaffold_6	+	63	19	present	present	verified	27	antiSMASH
BGC0001988|c1|16568-18000|-|P174DRAFT_512932|hypothetical_protein|PKX92302.1	DTO9_FUN_008298-T1	95.5	444	7	2	1	444	1	431	7.27e-296	801	100	444	431	DTO9	BGC0001988	DTO9_FUN_008298	222000_1	102749	104730	scaffold_6	-	63	19	present	present	verified	27	antiSMASH
BGC0001988|c1|18802-19725|-|P174DRAFT_512933|S-adenosyl-L-methionine-dependent_methyltransferase|PKX92303.1	DTO9_FUN_008299-T1	77.7	309	21	3	1	261	1	309	6.06e-167	462	100	261	309	DTO9	BGC0001988	DTO9_FUN_008299	221999_1	105262	106191	scaffold_6	-	63	19	present	present	verified	27	antiSMASH
BGC0001988|c1|20092-21461|+|P174DRAFT_512934|hypothetical_protein|PKX92304.1	DTO9_FUN_008300-T1	87.9	456	32	1	1	433	1	456	6.51e-300	812	100	433	456	DTO9	BGC0001988	DTO9_FUN_008300	221998_1	106542	107974	scaffold_6	+	63	19	present	present	verified	27	antiSMASH
BGC0001988|c1|21655-22240|-|P174DRAFT_372388|hypothetical_protein|PKX92305.1	DTO9_FUN_008301-T1	97.4	151	4	0	1	151	1	151	3.48e-112	313	100	151	151	DTO9	BGC0001988	DTO9_FUN_008301	221997_1	108103	108665	scaffold_6	-	63	19	present	present	verified	27	antiSMASH
BGC0001988|c1|22456-23007|+|P174DRAFT_373009|DUF1772-domain-containing_protein|PKX92306.1	DTO9_FUN_008302-T1	92	162	13	0	1	162	1	162	1.22e-106	300	100	162	162	DTO9	BGC0001988	DTO9_FUN_008302	221996_1	108883	109433	scaffold_6	+	63	19	present	present	verified	27	antiSMASH
BGC0001988|c1|23258-24391|-|P174DRAFT_460891|metallo-beta-lactamase_superfamily_protein|PKX92307.1	DTO9_FUN_008303-T1	96.4	309	11	0	1	309	1	309	1.19e-220	601	96	322	314	DTO9	BGC0001988	DTO9_FUN_008303	221995_1	109799	110804	scaffold_6	-	63	19	present	present	verified	27	antiSMASH
BGC0001988|c1|24740-30462|+|P174DRAFT_487776|putative_polyketide_synthase|PKX92308.1	DTO9_FUN_008304-T1	94.8	1824	59	4	1	1792	1	1821	0	3392	100	1792	1821	DTO9	BGC0001988	DTO9_FUN_008304	221994_1	111140	116838	scaffold_6	+	63	19	present	present	verified	27	antiSMASH
BGC0001988|c1|31035-32171|-|P174DRAFT_372038|hypothetical_protein|PKX92309.1	DTO9_FUN_008305-T1	91.5	378	32	0	1	378	1	378	9.73e-241	657	100	378	378	DTO9	BGC0001988	DTO9_FUN_008305	221993_1	117303	118439	scaffold_6	-	63	19	present	present	verified	27	antiSMASH
BGC0001403|c1|4-1512|+|AFUA_4G14450|mannitol_dehydrogenase,_putative|EAL89350.1	DTO10_FUN_004884-T1	96.8	502	16	0	1	502	1	502	0	992	100	502	502	DTO10	BGC0001403	DTO10_FUN_004884	221965_1	198071	199579	scaffold_4	-	27	14	present	present	verified	27	antiSMASH
BGC0001403|c1|1911-2870|-|AFUA_4G14460|conserved_hypothetical_protein|EAL89349.1	DTO10_FUN_004883-T1	92.2	319	25	0	1	319	1	319	6.85e-225	612	100	319	319	DTO10	BGC0001403	DTO10_FUN_004883	221966_1	196656	197615	scaffold_4	+	27	14	present	present	verified	27	antiSMASH
BGC0001403|c1|3224-3759|-|AFUA_4G14480|conserved_hypothetical_protein|EAL89348.2	DTO10_FUN_004882-T1	92	162	12	1	1	161	1	162	1.48e-100	285	100	161	162	DTO10	BGC0001403	DTO10_FUN_004882	221967_1	195762	196299	scaffold_4	+	27	14	present	present	verified	27	antiSMASH
BGC0001403|c1|4034-4560|+|AFUA_4G14470|hypothetical_protein|EAL89347.1	DTO10_FUN_004881-T1	95.8	142	6	0	1	142	1	142	7.92e-101	284	100	142	146	DTO10	BGC0001403	DTO10_FUN_004881	221968_1	194953	195497	scaffold_4	-	27	14	present	present	verified	27	antiSMASH
BGC0001403|c1|4803-6930|+|AFUA_4G14490|extracellular_dihydrogeodin_oxidase/laccase,_putative|EAL89346.1	DTO10_FUN_004880-T1	92.6	609	42	1	1	609	1	606	0	1212	100	609	606	DTO10	BGC0001403	DTO10_FUN_004880	221969_1	192576	194706	scaffold_4	-	27	14	present	present	verified	27	antiSMASH
BGC0001403|c1|7420-8757|+|AFUA_4G14500|conserved_hypothetical_protein|EAL89345.1	DTO10_FUN_004879-T1	91.7	445	37	0	1	445	1	445	8.85e-303	820	100	445	445	DTO10	BGC0001403	DTO10_FUN_004879	221970_1	190738	192075	scaffold_4	-	27	14	present	present	verified	27	antiSMASH
BGC0001403|c1|8918-9941|-|AFUA_4G14510|hypothetical_protein|EAL89344.2	DTO10_FUN_004878-T1	95.4	282	13	0	1	282	1	282	8.52e-205	558	100	282	282	DTO10	BGC0001403	DTO10_FUN_004878	221971_1	189474	190491	scaffold_4	+	27	14	present	present	verified	27	antiSMASH
BGC0001403|c1|10528-11319|+|AFUA_4G14520|toxin_biosynthesis_protein,_putative|EAL89343.1	DTO10_FUN_004877-T1	94.6	261	14	0	1	261	1	261	3.24e-185	507	99.2	263	269	DTO10	BGC0001403	DTO10_FUN_004877	221972_1	188064	188873	scaffold_4	-	27	14	present	present	verified	27	antiSMASH
BGC0001403|c1|11737-12414|+|AFUA_4G14530|glutathione_S-transferase_Ure2-like,_putative|EAL89342.1	DTO10_FUN_004876-T1	93.8	225	14	0	1	225	1	225	1.78e-164	451	100	225	225	DTO10	BGC0001403	DTO10_FUN_004876	221973_1	187015	187692	scaffold_4	-	27	14	present	present	verified	27	antiSMASH
BGC0001403|c1|12504-13694|-|AFUA_4G14540|C6_transcription_factor_(AflR),_putative|EAL89341.2	DTO10_FUN_004875-T1	87.9	396	48	0	1	396	1	396	6.62e-248	677	100	396	396	DTO10	BGC0001403	DTO10_FUN_004875	221974_1	185743	186933	scaffold_4	+	27	14	present	present	verified	27	antiSMASH
BGC0001403|c1|15066-16431|-|AFUA_4G14550|toxin_biosynthesis_regulatory_protein_AflJ,_putative|EAL89340.1	DTO10_FUN_004874-T1	88.7	433	49	0	1	433	23	455	9.82e-272	741	99.1	437	461	DTO10	BGC0001403	DTO10_FUN_004874	221975_1	182898	184335	scaffold_4	+	27	14	present	present	verified	27	antiSMASH
BGC0001403|c1|16737-22267|-|AFUA_4G14560|polyketide_synthase,_putative|EAL89339.1	DTO10_FUN_004873-T1	94	1785	104	1	1	1782	1	1785	0	3328	100	1782	1785	DTO10	BGC0001403	DTO10_FUN_004873	221976_1	177110	182651	scaffold_4	+	27	14	present	present	verified	27	antiSMASH
BGC0001403|c1|22406-23671|+|AFUA_4G14570|metallo-beta-lactamase_domain_protein,_putative|EAL89338.1	DTO10_FUN_004872-T1	88.8	339	19	1	83	421	1	320	1.22e-217	598	80.5	421	320	DTO10	BGC0001403	DTO10_FUN_004872	221977_1	175724	176744	scaffold_4	-	27	14	present	present	verified	27	antiSMASH
BGC0001403|c1|24072-25708|+|AFUA_4G14580|O-methyltransferase,_putative|EAL89337.1	DTO10_FUN_004871-T1	95.6	482	21	0	1	482	38	519	0	932	100	482	519	DTO10	BGC0001403	DTO10_FUN_004871	221978_1	173695	175485	scaffold_4	-	27	14	present	present	verified	27	antiSMASH
BGC0001403|c1|4-1512|+|AFUA_4G14450|mannitol_dehydrogenase,_putative|EAL89350.1	DTO11_FUN_006021-T1	96.8	502	16	0	1	502	1	502	0	992	100	502	502	DTO11	BGC0001403	DTO11_FUN_006021	221965_1	3249224	3251365	scaffold_4	+	27	14	present	present	verified	27	antiSMASH
BGC0001403|c1|1911-2870|-|AFUA_4G14460|conserved_hypothetical_protein|EAL89349.1	DTO11_FUN_006022-T1	91.8	319	26	0	1	319	1	319	3.85e-224	610	100	319	319	DTO11	BGC0001403	DTO11_FUN_006022	221966_1	3251499	3252458	scaffold_4	-	27	14	present	present	verified	27	antiSMASH
BGC0001403|c1|3224-3759|-|AFUA_4G14480|conserved_hypothetical_protein|EAL89348.2	DTO11_FUN_006023-T1	92	162	12	1	1	161	1	162	1.44e-100	285	100	161	162	DTO11	BGC0001403	DTO11_FUN_006023	221967_1	3252815	3253352	scaffold_4	-	27	14	present	present	verified	27	antiSMASH
BGC0001403|c1|4034-4560|+|AFUA_4G14470|hypothetical_protein|EAL89347.1	DTO11_FUN_006024-T1	95.8	142	6	0	1	142	1	142	7.71e-101	284	100	142	146	DTO11	BGC0001403	DTO11_FUN_006024	221968_1	3253616	3254160	scaffold_4	+	27	14	present	present	verified	27	antiSMASH
BGC0001403|c1|4803-6930|+|AFUA_4G14490|extracellular_dihydrogeodin_oxidase/laccase,_putative|EAL89346.1	DTO11_FUN_006025-T1	92.4	609	42	2	1	609	1	605	0	1207	100	609	605	DTO11	BGC0001403	DTO11_FUN_006025	221969_1	3254407	3256534	scaffold_4	+	27	14	present	present	verified	27	antiSMASH
BGC0001403|c1|7420-8757|+|AFUA_4G14500|conserved_hypothetical_protein|EAL89345.1	DTO11_FUN_006026-T1	92.1	445	35	0	1	445	1	445	4.47e-305	825	100	445	445	DTO11	BGC0001403	DTO11_FUN_006026	221970_1	3257039	3258376	scaffold_4	+	27	14	present	present	verified	27	antiSMASH
BGC0001403|c1|8918-9941|-|AFUA_4G14510|hypothetical_protein|EAL89344.2	DTO11_FUN_006027-T1	95.4	282	13	0	1	282	1	282	8.29e-205	558	100	282	282	DTO11	BGC0001403	DTO11_FUN_006027	221971_1	3258624	3259641	scaffold_4	-	27	14	present	present	verified	27	antiSMASH
BGC0001403|c1|10528-11319|+|AFUA_4G14520|toxin_biosynthesis_protein,_putative|EAL89343.1	DTO11_FUN_006028-T1	94.6	261	14	0	1	261	1	261	3.16e-185	507	99.2	263	269	DTO11	BGC0001403	DTO11_FUN_006028	221972_1	3260255	3261064	scaffold_4	+	27	14	present	present	verified	27	antiSMASH
BGC0001403|c1|11737-12414|+|AFUA_4G14530|glutathione_S-transferase_Ure2-like,_putative|EAL89342.1	DTO11_FUN_006029-T1	93.8	225	14	0	1	225	1	225	1.73e-164	451	100	225	225	DTO11	BGC0001403	DTO11_FUN_006029	221973_1	3261400	3262113	scaffold_4	+	27	14	present	present	verified	27	antiSMASH
BGC0001403|c1|12504-13694|-|AFUA_4G14540|C6_transcription_factor_(AflR),_putative|EAL89341.2	DTO11_FUN_006030-T1	87.6	396	49	0	1	396	1	396	1.85e-247	676	100	396	396	DTO11	BGC0001403	DTO11_FUN_006030	221974_1	3262195	3263385	scaffold_4	-	27	14	present	present	verified	27	antiSMASH
BGC0001403|c1|15066-16431|-|AFUA_4G14550|toxin_biosynthesis_regulatory_protein_AflJ,_putative|EAL89340.1	DTO11_FUN_006031-T1	89.1	433	47	0	1	433	1	433	2.85e-273	744	99.1	437	442	DTO11	BGC0001403	DTO11_FUN_006031	221975_1	3264812	3266192	scaffold_4	-	27	14	present	present	verified	27	antiSMASH
BGC0001403|c1|16737-22267|-|AFUA_4G14560|polyketide_synthase,_putative|EAL89339.1	DTO11_FUN_006032-T1	93.7	1785	109	1	1	1782	1	1785	0	3310	100	1782	1785	DTO11	BGC0001403	DTO11_FUN_006032	221976_1	3266521	3272062	scaffold_4	-	27	14	present	present	verified	27	antiSMASH
BGC0001403|c1|22406-23671|+|AFUA_4G14570|metallo-beta-lactamase_domain_protein,_putative|EAL89338.1	DTO11_FUN_006033-T1	88.8	339	19	1	83	421	1	320	1.19e-217	598	80.5	421	320	DTO11	BGC0001403	DTO11_FUN_006033	221977_1	3272453	3273473	scaffold_4	+	27	14	present	present	verified	27	antiSMASH
BGC0001403|c1|24072-25708|+|AFUA_4G14580|O-methyltransferase,_putative|EAL89337.1	DTO11_FUN_006034-T1	95.6	482	21	0	1	482	38	519	0	932	100	482	519	DTO11	BGC0001403	DTO11_FUN_006034	221978_1	3273590	3275502	scaffold_4	+	27	14	present	present	verified	27	antiSMASH
BGC0001403|c1|4-1512|+|AFUA_4G14450|mannitol_dehydrogenase,_putative|EAL89350.1	DTO12_FUN_001598-T1	96.6	502	17	0	1	502	1	502	0	990	100	502	502	DTO12	BGC0001403	DTO12_FUN_001598	221965_1	179355	180863	scaffold_2	-	27	14	present	present	verified	27	antiSMASH
BGC0001403|c1|1911-2870|-|AFUA_4G14460|conserved_hypothetical_protein|EAL89349.1	DTO12_FUN_001597-T1	91.8	319	26	0	1	319	1	319	1.17e-223	609	100	319	319	DTO12	BGC0001403	DTO12_FUN_001597	221966_1	177940	178899	scaffold_2	+	27	14	present	present	verified	27	antiSMASH
BGC0001403|c1|3224-3759|-|AFUA_4G14480|conserved_hypothetical_protein|EAL89348.2	DTO12_FUN_001596-T1	92	162	12	1	1	161	1	162	1.52e-100	285	100	161	162	DTO12	BGC0001403	DTO12_FUN_001596	221967_1	177046	177583	scaffold_2	+	27	14	present	present	verified	27	antiSMASH
BGC0001403|c1|4034-4560|+|AFUA_4G14470|hypothetical_protein|EAL89347.1	DTO12_FUN_001595-T1	95.8	142	6	0	1	142	1	142	8.16e-101	284	100	142	146	DTO12	BGC0001403	DTO12_FUN_001595	221968_1	176237	176781	scaffold_2	-	27	14	present	present	verified	27	antiSMASH
BGC0001403|c1|4803-6930|+|AFUA_4G14490|extracellular_dihydrogeodin_oxidase/laccase,_putative|EAL89346.1	DTO12_FUN_001594-T1	92.3	609	43	2	1	609	1	605	0	1206	100	609	605	DTO12	BGC0001403	DTO12_FUN_001594	221969_1	173863	175990	scaffold_2	-	27	14	present	present	verified	27	antiSMASH
BGC0001403|c1|7420-8757|+|AFUA_4G14500|conserved_hypothetical_protein|EAL89345.1	DTO12_FUN_001593-T1	92.1	445	35	0	1	445	1	445	4.73e-305	825	100	445	445	DTO12	BGC0001403	DTO12_FUN_001593	221970_1	172009	173346	scaffold_2	-	27	14	present	present	verified	27	antiSMASH
BGC0001403|c1|8918-9941|-|AFUA_4G14510|hypothetical_protein|EAL89344.2	DTO12_FUN_001592-T1	95.4	282	13	0	1	282	1	282	8.77e-205	558	100	282	282	DTO12	BGC0001403	DTO12_FUN_001592	221971_1	170742	171759	scaffold_2	+	27	14	present	present	verified	27	antiSMASH
BGC0001403|c1|10528-11319|+|AFUA_4G14520|toxin_biosynthesis_protein,_putative|EAL89343.1	DTO12_FUN_001591-T1	94.6	261	14	0	1	261	1	261	3.34e-185	507	99.2	263	269	DTO12	BGC0001403	DTO12_FUN_001591	221972_1	169319	170128	scaffold_2	-	27	14	present	present	verified	27	antiSMASH
BGC0001403|c1|11737-12414|+|AFUA_4G14530|glutathione_S-transferase_Ure2-like,_putative|EAL89342.1	DTO12_FUN_001590-T1	94.2	225	13	0	1	225	1	225	4.49e-165	453	100	225	225	DTO12	BGC0001403	DTO12_FUN_001590	221973_1	168270	168947	scaffold_2	-	27	14	present	present	verified	27	antiSMASH
BGC0001403|c1|12504-13694|-|AFUA_4G14540|C6_transcription_factor_(AflR),_putative|EAL89341.2	DTO12_FUN_001589-T1	87.6	396	49	0	1	396	1	396	1.95e-247	676	100	396	396	DTO12	BGC0001403	DTO12_FUN_001589	221974_1	166998	168188	scaffold_2	+	27	14	present	present	verified	27	antiSMASH
BGC0001403|c1|15066-16431|-|AFUA_4G14550|toxin_biosynthesis_regulatory_protein_AflJ,_putative|EAL89340.1	DTO12_FUN_001588-T1	89.1	433	47	0	1	433	1	433	3.01e-273	744	99.1	437	442	DTO12	BGC0001403	DTO12_FUN_001588	221975_1	164193	165573	scaffold_2	+	27	14	present	present	verified	27	antiSMASH
BGC0001403|c1|16737-22267|-|AFUA_4G14560|polyketide_synthase,_putative|EAL89339.1	DTO12_FUN_001587-T1	93.7	1785	110	1	1	1782	1	1785	0	3309	100	1782	1785	DTO12	BGC0001403	DTO12_FUN_001587	221976_1	158323	163864	scaffold_2	+	27	14	present	present	verified	27	antiSMASH
BGC0001403|c1|22406-23671|+|AFUA_4G14570|metallo-beta-lactamase_domain_protein,_putative|EAL89338.1	DTO12_FUN_001586-T1	88.8	339	19	1	83	421	1	320	1.26e-217	598	80.5	421	320	DTO12	BGC0001403	DTO12_FUN_001586	221977_1	156912	157932	scaffold_2	-	27	14	present	present	verified	27	antiSMASH
BGC0001403|c1|24072-25708|+|AFUA_4G14580|O-methyltransferase,_putative|EAL89337.1	DTO12_FUN_001585-T1	95.4	482	22	0	1	482	1	482	0	931	100	482	482	DTO12	BGC0001403	DTO12_FUN_001585	221978_1	154883	156514	scaffold_2	-	27	14	present	present	verified	27	antiSMASH
BGC0001403|c1|4-1512|+|AFUA_4G14450|mannitol_dehydrogenase,_putative|EAL89350.1	DTO13_FUN_009341-T1	96.6	502	17	0	1	502	1	502	0	990	100	502	502	DTO13	BGC0001403	DTO13_FUN_009341	221965_1	3181679	3183805	scaffold_6	+	27	14	present	present	verified	27	antiSMASH
BGC0001403|c1|1911-2870|-|AFUA_4G14460|conserved_hypothetical_protein|EAL89349.1	DTO13_FUN_009342-T1	92.2	319	25	0	1	319	1	319	6.72e-225	612	100	319	319	DTO13	BGC0001403	DTO13_FUN_009342	221966_1	3183969	3184928	scaffold_6	-	27	14	present	present	verified	27	antiSMASH
BGC0001403|c1|3224-3759|-|AFUA_4G14480|conserved_hypothetical_protein|EAL89348.2	DTO13_FUN_009343-T1	92	162	12	1	1	161	1	162	1.45e-100	285	100	161	162	DTO13	BGC0001403	DTO13_FUN_009343	221967_1	3185285	3185822	scaffold_6	-	27	14	present	present	verified	27	antiSMASH
BGC0001403|c1|4034-4560|+|AFUA_4G14470|hypothetical_protein|EAL89347.1	DTO13_FUN_009344-T1	95.8	142	6	0	1	142	1	142	7.78e-101	284	100	142	146	DTO13	BGC0001403	DTO13_FUN_009344	221968_1	3186087	3186631	scaffold_6	+	27	14	present	present	verified	27	antiSMASH
BGC0001403|c1|4803-6930|+|AFUA_4G14490|extracellular_dihydrogeodin_oxidase/laccase,_putative|EAL89346.1	DTO13_FUN_009345-T1	92.4	609	42	2	1	609	1	605	0	1207	100	609	605	DTO13	BGC0001403	DTO13_FUN_009345	221969_1	3186878	3189005	scaffold_6	+	27	14	present	present	verified	27	antiSMASH
BGC0001403|c1|7420-8757|+|AFUA_4G14500|conserved_hypothetical_protein|EAL89345.1	DTO13_FUN_009346-T1	91.9	445	36	0	1	445	1	445	2.6e-304	823	100	445	445	DTO13	BGC0001403	DTO13_FUN_009346	221970_1	3189522	3190859	scaffold_6	+	27	14	present	present	verified	27	antiSMASH
BGC0001403|c1|8918-9941|-|AFUA_4G14510|hypothetical_protein|EAL89344.2	DTO13_FUN_009347-T1	95.4	282	13	0	1	282	1	282	8.36e-205	558	100	282	282	DTO13	BGC0001403	DTO13_FUN_009347	221971_1	3191109	3192126	scaffold_6	-	27	14	present	present	verified	27	antiSMASH
BGC0001403|c1|10528-11319|+|AFUA_4G14520|toxin_biosynthesis_protein,_putative|EAL89343.1	DTO13_FUN_009348-T1	94.3	261	15	0	1	261	1	261	1.3e-184	506	99.2	263	269	DTO13	BGC0001403	DTO13_FUN_009348	221972_1	3192740	3193549	scaffold_6	+	27	14	present	present	verified	27	antiSMASH
BGC0001403|c1|11737-12414|+|AFUA_4G14530|glutathione_S-transferase_Ure2-like,_putative|EAL89342.1	DTO13_FUN_009349-T1	94.2	225	13	0	1	225	1	225	4.28e-165	453	100	225	225	DTO13	BGC0001403	DTO13_FUN_009349	221973_1	3193880	3194659	scaffold_6	+	27	14	present	present	verified	27	antiSMASH
BGC0001403|c1|12504-13694|-|AFUA_4G14540|C6_transcription_factor_(AflR),_putative|EAL89341.2	DTO13_FUN_009350-T1	88.1	396	47	0	1	396	1	396	1.13e-248	679	100	396	396	DTO13	BGC0001403	DTO13_FUN_009350	221974_1	3194680	3195872	scaffold_6	-	27	14	present	present	verified	27	antiSMASH
BGC0001403|c1|15066-16431|-|AFUA_4G14550|toxin_biosynthesis_regulatory_protein_AflJ,_putative|EAL89340.1	DTO13_FUN_009351-T1	88.2	433	51	0	1	433	8	440	3.71e-270	737	99.1	437	446	DTO13	BGC0001403	DTO13_FUN_009351	221975_1	3197277	3198669	scaffold_6	-	27	14	present	present	verified	27	antiSMASH
BGC0001403|c1|16737-22267|-|AFUA_4G14560|polyketide_synthase,_putative|EAL89339.1	DTO13_FUN_009352-T1	93.9	1785	105	1	1	1782	1	1785	0	3326	100	1782	1785	DTO13	BGC0001403	DTO13_FUN_009352	221976_1	3198961	3204502	scaffold_6	-	27	14	present	present	verified	27	antiSMASH
BGC0001403|c1|22406-23671|+|AFUA_4G14570|metallo-beta-lactamase_domain_protein,_putative|EAL89338.1	DTO13_FUN_009353-T1	88.8	339	19	1	83	421	1	320	1.2e-217	598	80.5	421	320	DTO13	BGC0001403	DTO13_FUN_009353	221977_1	3204868	3205888	scaffold_6	+	27	14	present	present	verified	27	antiSMASH
BGC0001403|c1|24072-25708|+|AFUA_4G14580|O-methyltransferase,_putative|EAL89337.1	DTO13_FUN_009354-T1	95.4	482	22	0	1	482	1	482	0	931	100	482	482	DTO13	BGC0001403	DTO13_FUN_009354	221978_1	3206286	3207917	scaffold_6	+	27	14	present	present	verified	27	antiSMASH
BGC0001403|c1|4-1512|+|AFUA_4G14450|mannitol_dehydrogenase,_putative|EAL89350.1	DTO14_FUN_005962-T1	96.6	502	17	0	1	502	1	502	0	990	100	502	502	DTO14	BGC0001403	DTO14_FUN_005962	221965_1	3180907	3183058	scaffold_4	+	27	14	present	present	verified	27	antiSMASH
BGC0001403|c1|1911-2870|-|AFUA_4G14460|conserved_hypothetical_protein|EAL89349.1	DTO14_FUN_005963-T1	92.2	319	25	0	1	319	1	319	7e-225	612	100	319	319	DTO14	BGC0001403	DTO14_FUN_005963	221966_1	3183216	3184175	scaffold_4	-	27	14	present	present	verified	27	antiSMASH
BGC0001403|c1|3224-3759|-|AFUA_4G14480|conserved_hypothetical_protein|EAL89348.2	DTO14_FUN_005964-T1	92	162	12	1	1	161	1	162	1.51e-100	285	100	161	162	DTO14	BGC0001403	DTO14_FUN_005964	221967_1	3184532	3185069	scaffold_4	-	27	14	present	present	verified	27	antiSMASH
BGC0001403|c1|4034-4560|+|AFUA_4G14470|hypothetical_protein|EAL89347.1	DTO14_FUN_005965-T1	95.8	142	6	0	1	142	1	142	8.1e-101	284	100	142	146	DTO14	BGC0001403	DTO14_FUN_005965	221968_1	3185334	3185878	scaffold_4	+	27	14	present	present	verified	27	antiSMASH
BGC0001403|c1|4803-6930|+|AFUA_4G14490|extracellular_dihydrogeodin_oxidase/laccase,_putative|EAL89346.1	DTO14_FUN_005966-T1	92.4	609	42	2	1	609	1	605	0	1207	100	609	605	DTO14	BGC0001403	DTO14_FUN_005966	221969_1	3186125	3188252	scaffold_4	+	27	14	present	present	verified	27	antiSMASH
BGC0001403|c1|7420-8757|+|AFUA_4G14500|conserved_hypothetical_protein|EAL89345.1	DTO14_FUN_005967-T1	91.9	445	36	0	1	445	1	445	2.71e-304	823	100	445	445	DTO14	BGC0001403	DTO14_FUN_005967	221970_1	3188769	3190106	scaffold_4	+	27	14	present	present	verified	27	antiSMASH
BGC0001403|c1|8918-9941|-|AFUA_4G14510|hypothetical_protein|EAL89344.2	DTO14_FUN_005968-T1	95.4	282	13	0	1	282	1	282	8.71e-205	558	100	282	282	DTO14	BGC0001403	DTO14_FUN_005968	221971_1	3190356	3191373	scaffold_4	-	27	14	present	present	verified	27	antiSMASH
BGC0001403|c1|10528-11319|+|AFUA_4G14520|toxin_biosynthesis_protein,_putative|EAL89343.1	DTO14_FUN_005969-T1	94.6	261	14	0	1	261	1	261	3.31e-185	507	99.2	263	269	DTO14	BGC0001403	DTO14_FUN_005969	221972_1	3191987	3192796	scaffold_4	+	27	14	present	present	verified	27	antiSMASH
BGC0001403|c1|11737-12414|+|AFUA_4G14530|glutathione_S-transferase_Ure2-like,_putative|EAL89342.1	DTO14_FUN_005970-T1	94.2	225	13	0	1	225	1	225	4.46e-165	453	100	225	225	DTO14	BGC0001403	DTO14_FUN_005970	221973_1	3193168	3193845	scaffold_4	+	27	14	present	present	verified	27	antiSMASH
BGC0001403|c1|12504-13694|-|AFUA_4G14540|C6_transcription_factor_(AflR),_putative|EAL89341.2	DTO14_FUN_005971-T1	88.1	396	47	0	1	396	1	396	1.17e-248	679	100	396	396	DTO14	BGC0001403	DTO14_FUN_005971	221974_1	3193927	3195117	scaffold_4	-	27	14	present	present	verified	27	antiSMASH
BGC0001403|c1|15066-16431|-|AFUA_4G14550|toxin_biosynthesis_regulatory_protein_AflJ,_putative|EAL89340.1	DTO14_FUN_005972-T1	88.2	433	51	0	1	433	8	440	3.86e-270	737	99.1	437	446	DTO14	BGC0001403	DTO14_FUN_005972	221975_1	3196524	3197916	scaffold_4	-	27	14	present	present	verified	27	antiSMASH
BGC0001403|c1|16737-22267|-|AFUA_4G14560|polyketide_synthase,_putative|EAL89339.1	DTO14_FUN_005973-T1	93.9	1785	105	1	1	1782	1	1785	0	3326	100	1782	1785	DTO14	BGC0001403	DTO14_FUN_005973	221976_1	3198208	3203749	scaffold_4	-	27	14	present	present	verified	27	antiSMASH
BGC0001403|c1|22406-23671|+|AFUA_4G14570|metallo-beta-lactamase_domain_protein,_putative|EAL89338.1	DTO14_FUN_005974-T1	88.8	339	19	1	83	421	1	320	1.25e-217	598	80.5	421	320	DTO14	BGC0001403	DTO14_FUN_005974	221977_1	3204115	3205135	scaffold_4	+	27	14	present	present	verified	27	antiSMASH
BGC0001403|c1|24072-25708|+|AFUA_4G14580|O-methyltransferase,_putative|EAL89337.1	DTO14_FUN_005975-T1	95.4	482	22	0	1	482	1	482	0	931	100	482	482	DTO14	BGC0001403	DTO14_FUN_005975	221978_1	3205462	3207164	scaffold_4	+	27	14	present	present	verified	27	antiSMASH
BGC0001403|c1|4-1512|+|AFUA_4G14450|mannitol_dehydrogenase,_putative|EAL89350.1	DTO15_FUN_005991-T1	96.6	502	17	0	1	502	1	502	0	990	100	502	502	DTO15	BGC0001403	DTO15_FUN_005991	221965_1	3188526	3190577	scaffold_4	+	27	14	present	present	verified	27	antiSMASH
BGC0001403|c1|1911-2870|-|AFUA_4G14460|conserved_hypothetical_protein|EAL89349.1	DTO15_FUN_005992-T1	92.2	319	25	0	1	319	1	319	6.96e-225	612	100	319	319	DTO15	BGC0001403	DTO15_FUN_005992	221966_1	3190743	3191702	scaffold_4	-	27	14	present	present	verified	27	antiSMASH
BGC0001403|c1|3224-3759|-|AFUA_4G14480|conserved_hypothetical_protein|EAL89348.2	DTO15_FUN_005993-T1	92	162	12	1	1	161	1	162	1.5e-100	285	100	161	162	DTO15	BGC0001403	DTO15_FUN_005993	221967_1	3191970	3192596	scaffold_4	-	27	14	present	present	verified	27	antiSMASH
BGC0001403|c1|4034-4560|+|AFUA_4G14470|hypothetical_protein|EAL89347.1	DTO15_FUN_005994-T1	95.8	142	6	0	1	142	1	142	8.06e-101	284	100	142	146	DTO15	BGC0001403	DTO15_FUN_005994	221968_1	3192861	3193405	scaffold_4	+	27	14	present	present	verified	27	antiSMASH
BGC0001403|c1|4803-6930|+|AFUA_4G14490|extracellular_dihydrogeodin_oxidase/laccase,_putative|EAL89346.1	DTO15_FUN_005995-T1	92.4	609	42	2	1	609	1	605	0	1207	100	609	605	DTO15	BGC0001403	DTO15_FUN_005995	221969_1	3193652	3195779	scaffold_4	+	27	14	present	present	verified	27	antiSMASH
BGC0001403|c1|7420-8757|+|AFUA_4G14500|conserved_hypothetical_protein|EAL89345.1	DTO15_FUN_005996-T1	91.9	445	36	0	1	445	1	445	2.7e-304	823	100	445	445	DTO15	BGC0001403	DTO15_FUN_005996	221970_1	3196296	3197633	scaffold_4	+	27	14	present	present	verified	27	antiSMASH
BGC0001403|c1|8918-9941|-|AFUA_4G14510|hypothetical_protein|EAL89344.2	DTO15_FUN_005997-T1	95.4	282	13	0	1	282	1	282	8.66e-205	558	100	282	282	DTO15	BGC0001403	DTO15_FUN_005997	221971_1	3197883	3198900	scaffold_4	-	27	14	present	present	verified	27	antiSMASH
BGC0001403|c1|10528-11319|+|AFUA_4G14520|toxin_biosynthesis_protein,_putative|EAL89343.1	DTO15_FUN_005998-T1	94.6	261	14	0	1	261	5	265	3.82e-185	507	99.2	263	273	DTO15	BGC0001403	DTO15_FUN_005998	221972_1	3199313	3200364	scaffold_4	+	27	14	present	present	verified	27	antiSMASH
BGC0001403|c1|11737-12414|+|AFUA_4G14530|glutathione_S-transferase_Ure2-like,_putative|EAL89342.1	DTO15_FUN_005999-T1	94.2	225	13	0	1	225	1	225	4.43e-165	453	100	225	225	DTO15	BGC0001403	DTO15_FUN_005999	221973_1	3200653	3201439	scaffold_4	+	27	14	present	present	verified	27	antiSMASH
BGC0001403|c1|12504-13694|-|AFUA_4G14540|C6_transcription_factor_(AflR),_putative|EAL89341.2	DTO15_FUN_006000-T1	88.1	396	47	0	1	396	1	396	1.17e-248	679	100	396	396	DTO15	BGC0001403	DTO15_FUN_006000	221974_1	3201454	3202644	scaffold_4	-	27	14	present	present	verified	27	antiSMASH
BGC0001403|c1|15066-16431|-|AFUA_4G14550|toxin_biosynthesis_regulatory_protein_AflJ,_putative|EAL89340.1	DTO15_FUN_006001-T1	88.2	433	51	0	1	433	8	440	3.84e-270	737	99.1	437	446	DTO15	BGC0001403	DTO15_FUN_006001	221975_1	3204051	3205443	scaffold_4	-	27	14	present	present	verified	27	antiSMASH
BGC0001403|c1|16737-22267|-|AFUA_4G14560|polyketide_synthase,_putative|EAL89339.1	DTO15_FUN_006002-T1	93.9	1785	105	1	1	1782	1	1785	0	3326	100	1782	1785	DTO15	BGC0001403	DTO15_FUN_006002	221976_1	3205735	3211276	scaffold_4	-	27	14	present	present	verified	27	antiSMASH
BGC0001403|c1|22406-23671|+|AFUA_4G14570|metallo-beta-lactamase_domain_protein,_putative|EAL89338.1	DTO15_FUN_006003-T1	88.8	339	19	1	83	421	1	320	1.24e-217	598	80.5	421	320	DTO15	BGC0001403	DTO15_FUN_006003	221977_1	3211642	3212662	scaffold_4	+	27	14	present	present	verified	27	antiSMASH
BGC0001403|c1|24072-25708|+|AFUA_4G14580|O-methyltransferase,_putative|EAL89337.1	DTO15_FUN_006004-T1	95.4	482	22	0	1	482	1	482	0	931	100	482	482	DTO15	BGC0001403	DTO15_FUN_006004	221978_1	3213060	3214691	scaffold_4	+	27	14	present	present	verified	27	antiSMASH
BGC0001403|c1|4-1512|+|AFUA_4G14450|mannitol_dehydrogenase,_putative|EAL89350.1	DTO16_FUN_008747-T1	96.6	502	17	0	1	502	1	502	0	990	100	502	502	DTO16	BGC0001403	DTO16_FUN_008747	221965_1	3213601	3215610	scaffold_6	+	27	14	present	present	verified	27	antiSMASH
BGC0001403|c1|1911-2870|-|AFUA_4G14460|conserved_hypothetical_protein|EAL89349.1	DTO16_FUN_008748-T1	92.2	319	25	0	1	319	1	319	6.72e-225	612	100	319	319	DTO16	BGC0001403	DTO16_FUN_008748	221966_1	3215777	3216736	scaffold_6	-	27	14	present	present	verified	27	antiSMASH
BGC0001403|c1|3224-3759|-|AFUA_4G14480|conserved_hypothetical_protein|EAL89348.2	DTO16_FUN_008749-T1	91.4	162	13	1	1	161	1	162	8.37e-100	283	100	161	162	DTO16	BGC0001403	DTO16_FUN_008749	221967_1	3217093	3217630	scaffold_6	-	27	14	present	present	verified	27	antiSMASH
BGC0001403|c1|4034-4560|+|AFUA_4G14470|hypothetical_protein|EAL89347.1	DTO16_FUN_008750-T1	95.8	142	6	0	1	142	1	142	7.78e-101	284	100	142	146	DTO16	BGC0001403	DTO16_FUN_008750	221968_1	3217895	3218439	scaffold_6	+	27	14	present	present	verified	27	antiSMASH
BGC0001403|c1|4803-6930|+|AFUA_4G14490|extracellular_dihydrogeodin_oxidase/laccase,_putative|EAL89346.1	DTO16_FUN_008751-T1	92.4	609	42	2	1	609	1	605	0	1207	100	609	605	DTO16	BGC0001403	DTO16_FUN_008751	221969_1	3218686	3220813	scaffold_6	+	27	14	present	present	verified	27	antiSMASH
BGC0001403|c1|7420-8757|+|AFUA_4G14500|conserved_hypothetical_protein|EAL89345.1	DTO16_FUN_008752-T1	92.1	445	35	0	1	445	1	445	4.5e-305	825	100	445	445	DTO16	BGC0001403	DTO16_FUN_008752	221970_1	3221330	3222667	scaffold_6	+	27	14	present	present	verified	27	antiSMASH
BGC0001403|c1|8918-9941|-|AFUA_4G14510|hypothetical_protein|EAL89344.2	DTO16_FUN_008753-T1	95.4	282	13	0	1	282	1	282	8.36e-205	558	100	282	282	DTO16	BGC0001403	DTO16_FUN_008753	221971_1	3222914	3223931	scaffold_6	-	27	14	present	present	verified	27	antiSMASH
BGC0001403|c1|10528-11319|+|AFUA_4G14520|toxin_biosynthesis_protein,_putative|EAL89343.1	DTO16_FUN_008754-T1	94.6	261	14	0	1	261	1	261	3.18e-185	507	99.2	263	269	DTO16	BGC0001403	DTO16_FUN_008754	221972_1	3224532	3225341	scaffold_6	+	27	14	present	present	verified	27	antiSMASH
BGC0001403|c1|11737-12414|+|AFUA_4G14530|glutathione_S-transferase_Ure2-like,_putative|EAL89342.1	DTO16_FUN_008755-T1	93.8	225	14	0	1	225	1	225	1.74e-164	451	100	225	225	DTO16	BGC0001403	DTO16_FUN_008755	221973_1	3225677	3226453	scaffold_6	+	27	14	present	present	verified	27	antiSMASH
BGC0001403|c1|12504-13694|-|AFUA_4G14540|C6_transcription_factor_(AflR),_putative|EAL89341.2	DTO16_FUN_008756-T1	87.9	396	48	0	1	396	1	396	6.5e-248	677	100	396	396	DTO16	BGC0001403	DTO16_FUN_008756	221974_1	3226472	3227662	scaffold_6	-	27	14	present	present	verified	27	antiSMASH
BGC0001403|c1|15066-16431|-|AFUA_4G14550|toxin_biosynthesis_regulatory_protein_AflJ,_putative|EAL89340.1	DTO16_FUN_008757-T1	88.5	433	50	0	1	433	1	433	1.73e-271	740	99.1	437	439	DTO16	BGC0001403	DTO16_FUN_008757	221975_1	3229070	3230441	scaffold_6	-	27	14	present	present	verified	27	antiSMASH
BGC0001403|c1|16737-22267|-|AFUA_4G14560|polyketide_synthase,_putative|EAL89339.1	DTO16_FUN_008758-T1	93.9	1785	105	1	1	1782	1	1785	0	3325	100	1782	1785	DTO16	BGC0001403	DTO16_FUN_008758	221976_1	3230754	3236295	scaffold_6	-	27	14	present	present	verified	27	antiSMASH
BGC0001403|c1|22406-23671|+|AFUA_4G14570|metallo-beta-lactamase_domain_protein,_putative|EAL89338.1	DTO16_FUN_008759-T1	88.8	339	19	1	83	421	1	320	1.2e-217	598	80.5	421	320	DTO16	BGC0001403	DTO16_FUN_008759	221977_1	3236661	3237681	scaffold_6	+	27	14	present	present	verified	27	antiSMASH
BGC0001403|c1|24072-25708|+|AFUA_4G14580|O-methyltransferase,_putative|EAL89337.1	DTO16_FUN_008760-T1	95.4	482	22	0	1	482	1	482	0	931	100	482	482	DTO16	BGC0001403	DTO16_FUN_008760	221978_1	3238079	3239710	scaffold_6	+	27	14	present	present	verified	27	antiSMASH
BGC0001403|c1|4-1512|+|AFUA_4G14450|mannitol_dehydrogenase,_putative|EAL89350.1	DTO1_FUN_005989-T1	96.6	502	17	0	1	502	1	502	0	990	100	502	502	DTO1	BGC0001403	DTO1_FUN_005989	221965_1	3186503	3188649	scaffold_4	+	27	14	present	present	verified	27	antiSMASH
BGC0001403|c1|1911-2870|-|AFUA_4G14460|conserved_hypothetical_protein|EAL89349.1	DTO1_FUN_005990-T1	91.8	319	26	0	1	319	1	319	1.16e-223	609	100	319	319	DTO1	BGC0001403	DTO1_FUN_005990	221966_1	3188810	3189769	scaffold_4	-	27	14	present	present	verified	27	antiSMASH
BGC0001403|c1|3224-3759|-|AFUA_4G14480|conserved_hypothetical_protein|EAL89348.2	DTO1_FUN_005991-T1	92	162	12	1	1	161	1	162	1.5e-100	285	100	161	162	DTO1	BGC0001403	DTO1_FUN_005991	221967_1	3190126	3190663	scaffold_4	-	27	14	present	present	verified	27	antiSMASH
BGC0001403|c1|4034-4560|+|AFUA_4G14470|hypothetical_protein|EAL89347.1	DTO1_FUN_005992-T1	95.8	142	6	0	1	142	1	142	8.07e-101	284	100	142	146	DTO1	BGC0001403	DTO1_FUN_005992	221968_1	3190928	3191472	scaffold_4	+	27	14	present	present	verified	27	antiSMASH
BGC0001403|c1|4803-6930|+|AFUA_4G14490|extracellular_dihydrogeodin_oxidase/laccase,_putative|EAL89346.1	DTO1_FUN_005993-T1	92.4	609	42	2	1	609	1	605	0	1207	100	609	605	DTO1	BGC0001403	DTO1_FUN_005993	221969_1	3191719	3193846	scaffold_4	+	27	14	present	present	verified	27	antiSMASH
BGC0001403|c1|7420-8757|+|AFUA_4G14500|conserved_hypothetical_protein|EAL89345.1	DTO1_FUN_005994-T1	92.1	445	35	0	1	445	1	445	4.67e-305	825	100	445	445	DTO1	BGC0001403	DTO1_FUN_005994	221970_1	3194363	3195700	scaffold_4	+	27	14	present	present	verified	27	antiSMASH
BGC0001403|c1|8918-9941|-|AFUA_4G14510|hypothetical_protein|EAL89344.2	DTO1_FUN_005995-T1	95.4	282	13	0	1	282	1	282	8.68e-205	558	100	282	282	DTO1	BGC0001403	DTO1_FUN_005995	221971_1	3195947	3196964	scaffold_4	-	27	14	present	present	verified	27	antiSMASH
BGC0001403|c1|10528-11319|+|AFUA_4G14520|toxin_biosynthesis_protein,_putative|EAL89343.1	DTO1_FUN_005996-T1	94.6	261	14	0	1	261	1	261	3.3e-185	507	99.2	263	269	DTO1	BGC0001403	DTO1_FUN_005996	221972_1	3197565	3198389	scaffold_4	+	27	14	present	present	verified	27	antiSMASH
BGC0001403|c1|11737-12414|+|AFUA_4G14530|glutathione_S-transferase_Ure2-like,_putative|EAL89342.1	DTO1_FUN_005997-T1	93.8	225	14	0	1	225	1	225	1.81e-164	451	100	225	225	DTO1	BGC0001403	DTO1_FUN_005997	221973_1	3198704	3199479	scaffold_4	+	27	14	present	present	verified	27	antiSMASH
BGC0001403|c1|12504-13694|-|AFUA_4G14540|C6_transcription_factor_(AflR),_putative|EAL89341.2	DTO1_FUN_005998-T1	87.9	396	48	0	1	396	1	396	1.36e-247	676	100	396	396	DTO1	BGC0001403	DTO1_FUN_005998	221974_1	3199505	3200695	scaffold_4	-	27	14	present	present	verified	27	antiSMASH
BGC0001403|c1|15066-16431|-|AFUA_4G14550|toxin_biosynthesis_regulatory_protein_AflJ,_putative|EAL89340.1	DTO1_FUN_005999-T1	88.2	433	51	0	1	433	8	440	3.85e-270	737	99.1	437	446	DTO1	BGC0001403	DTO1_FUN_005999	221975_1	3202102	3203494	scaffold_4	-	27	14	present	present	verified	27	antiSMASH
BGC0001403|c1|16737-22267|-|AFUA_4G14560|polyketide_synthase,_putative|EAL89339.1	DTO1_FUN_006000-T1	93.9	1785	105	1	1	1782	1	1785	0	3326	100	1782	1785	DTO1	BGC0001403	DTO1_FUN_006000	221976_1	3203786	3209327	scaffold_4	-	27	14	present	present	verified	27	antiSMASH
BGC0001403|c1|22406-23671|+|AFUA_4G14570|metallo-beta-lactamase_domain_protein,_putative|EAL89338.1	DTO1_FUN_006001-T1	88.8	339	19	1	83	421	1	320	1.25e-217	598	80.5	421	320	DTO1	BGC0001403	DTO1_FUN_006001	221977_1	3209693	3210713	scaffold_4	+	27	14	present	present	verified	27	antiSMASH
BGC0001403|c1|24072-25708|+|AFUA_4G14580|O-methyltransferase,_putative|EAL89337.1	DTO1_FUN_006002-T1	95.6	482	21	0	1	482	1	482	0	932	100	482	482	DTO1	BGC0001403	DTO1_FUN_006002	221978_1	3211111	3212742	scaffold_4	+	27	14	present	present	verified	27	antiSMASH
BGC0001403|c1|4-1512|+|AFUA_4G14450|mannitol_dehydrogenase,_putative|EAL89350.1	DTO2_FUN_008217-T1	96.7	423	14	0	80	502	1	423	3.05000000000001e-310	840	84.3	502	423	DTO2	BGC0001403	DTO2_FUN_008217	221965_1	168051	170082	scaffold_6	-	27	14	present	present	verified	27	antiSMASH
BGC0001403|c1|1911-2870|-|AFUA_4G14460|conserved_hypothetical_protein|EAL89349.1	DTO2_FUN_008216-T1	91.8	319	26	0	1	319	1	319	7.8e-224	609	100	319	319	DTO2	BGC0001403	DTO2_FUN_008216	221966_1	166929	167888	scaffold_6	+	27	14	present	present	verified	27	antiSMASH
BGC0001403|c1|3224-3759|-|AFUA_4G14480|conserved_hypothetical_protein|EAL89348.2	DTO2_FUN_008215-T1	90.7	162	14	1	1	161	1	162	1.18e-99	282	100	161	162	DTO2	BGC0001403	DTO2_FUN_008215	221967_1	166035	166572	scaffold_6	+	27	14	present	present	verified	27	antiSMASH
BGC0001403|c1|4034-4560|+|AFUA_4G14470|hypothetical_protein|EAL89347.1	DTO2_FUN_008214-T1	95.8	142	6	0	1	142	1	142	7.74e-101	284	100	142	146	DTO2	BGC0001403	DTO2_FUN_008214	221968_1	165226	165770	scaffold_6	-	27	14	present	present	verified	27	antiSMASH
BGC0001403|c1|4803-6930|+|AFUA_4G14490|extracellular_dihydrogeodin_oxidase/laccase,_putative|EAL89346.1	DTO2_FUN_008213-T1	92.4	609	42	2	1	609	1	605	0	1207	100	609	605	DTO2	BGC0001403	DTO2_FUN_008213	221969_1	162852	164979	scaffold_6	-	27	14	present	present	verified	27	antiSMASH
BGC0001403|c1|7420-8757|+|AFUA_4G14500|conserved_hypothetical_protein|EAL89345.1	DTO2_FUN_008212-T1	91.5	445	38	0	1	445	1	445	7.1e-302	817	100	445	445	DTO2	BGC0001403	DTO2_FUN_008212	221970_1	161002	162339	scaffold_6	-	27	14	present	present	verified	27	antiSMASH
BGC0001403|c1|8918-9941|-|AFUA_4G14510|hypothetical_protein|EAL89344.2	DTO2_FUN_008211-T1	95.4	282	13	0	1	282	1	282	8.32e-205	558	100	282	282	DTO2	BGC0001403	DTO2_FUN_008211	221971_1	159738	160755	scaffold_6	+	27	14	present	present	verified	27	antiSMASH
BGC0001403|c1|10528-11319|+|AFUA_4G14520|toxin_biosynthesis_protein,_putative|EAL89343.1	DTO2_FUN_008210-T1	94.6	261	14	0	1	261	1	261	3.17e-185	507	99.2	263	269	DTO2	BGC0001403	DTO2_FUN_008210	221972_1	158328	159137	scaffold_6	-	27	14	present	present	verified	27	antiSMASH
BGC0001403|c1|11737-12414|+|AFUA_4G14530|glutathione_S-transferase_Ure2-like,_putative|EAL89342.1	DTO2_FUN_008209-T1	93.8	225	14	0	1	225	1	225	1.74e-164	451	100	225	225	DTO2	BGC0001403	DTO2_FUN_008209	221973_1	157223	157992	scaffold_6	-	27	14	present	present	verified	27	antiSMASH
BGC0001403|c1|12504-13694|-|AFUA_4G14540|C6_transcription_factor_(AflR),_putative|EAL89341.2	DTO2_FUN_008208-T1	87.9	396	48	0	1	396	1	396	6.47e-248	677	100	396	396	DTO2	BGC0001403	DTO2_FUN_008208	221974_1	156007	157197	scaffold_6	+	27	14	present	present	verified	27	antiSMASH
BGC0001403|c1|15066-16431|-|AFUA_4G14550|toxin_biosynthesis_regulatory_protein_AflJ,_putative|EAL89340.1	DTO2_FUN_008207-T1	88.5	433	50	0	1	433	23	455	3.9e-271	740	99.1	437	461	DTO2	BGC0001403	DTO2_FUN_008207	221975_1	153162	154599	scaffold_6	+	27	14	present	present	verified	27	antiSMASH
BGC0001403|c1|16737-22267|-|AFUA_4G14560|polyketide_synthase,_putative|EAL89339.1	DTO2_FUN_008206-T1	93.9	1785	105	1	1	1782	1	1785	0	3326	100	1782	1785	DTO2	BGC0001403	DTO2_FUN_008206	221976_1	147374	152915	scaffold_6	+	27	14	present	present	verified	27	antiSMASH
BGC0001403|c1|22406-23671|+|AFUA_4G14570|metallo-beta-lactamase_domain_protein,_putative|EAL89338.1	DTO2_FUN_008205-T1	88.8	339	19	1	83	421	1	320	1.2e-217	598	80.5	421	320	DTO2	BGC0001403	DTO2_FUN_008205	221977_1	145988	147008	scaffold_6	-	27	14	present	present	verified	27	antiSMASH
BGC0001403|c1|24072-25708|+|AFUA_4G14580|O-methyltransferase,_putative|EAL89337.1	DTO2_FUN_008204-T1	95.4	482	22	0	1	482	1	482	0	931	100	482	482	DTO2	BGC0001403	DTO2_FUN_008204	221978_1	143959	145590	scaffold_6	-	27	14	present	present	verified	27	antiSMASH
BGC0001403|c1|4-1512|+|AFUA_4G14450|mannitol_dehydrogenase,_putative|EAL89350.1	DTO3_FUN_009183-T1	96.8	502	16	0	1	502	1	502	0	992	100	502	502	DTO3	BGC0001403	DTO3_FUN_009183	221965_1	3288091	3290095	scaffold_6	+	27	14	present	present	verified	27	antiSMASH
BGC0001403|c1|1911-2870|-|AFUA_4G14460|conserved_hypothetical_protein|EAL89349.1	DTO3_FUN_009184-T1	91.8	319	26	0	1	319	1	319	9.56e-225	612	100	319	319	DTO3	BGC0001403	DTO3_FUN_009184	221966_1	3290260	3291219	scaffold_6	-	27	14	present	present	verified	27	antiSMASH
BGC0001403|c1|3224-3759|-|AFUA_4G14480|conserved_hypothetical_protein|EAL89348.2	DTO3_FUN_009185-T1	92	162	12	1	1	161	1	162	1.45e-100	285	100	161	162	DTO3	BGC0001403	DTO3_FUN_009185	221967_1	3291576	3292113	scaffold_6	-	27	14	present	present	verified	27	antiSMASH
BGC0001403|c1|4034-4560|+|AFUA_4G14470|hypothetical_protein|EAL89347.1	DTO3_FUN_009186-T1	95.8	142	6	0	1	142	1	142	7.79e-101	284	100	142	146	DTO3	BGC0001403	DTO3_FUN_009186	221968_1	3292378	3292922	scaffold_6	+	27	14	present	present	verified	27	antiSMASH
BGC0001403|c1|4803-6930|+|AFUA_4G14490|extracellular_dihydrogeodin_oxidase/laccase,_putative|EAL89346.1	DTO3_FUN_009187-T1	92.4	609	42	2	1	609	1	605	0	1207	100	609	605	DTO3	BGC0001403	DTO3_FUN_009187	221969_1	3293169	3295296	scaffold_6	+	27	14	present	present	verified	27	antiSMASH
BGC0001403|c1|7420-8757|+|AFUA_4G14500|conserved_hypothetical_protein|EAL89345.1	DTO3_FUN_009188-T1	92.1	445	35	0	1	445	1	445	4.51e-305	825	100	445	445	DTO3	BGC0001403	DTO3_FUN_009188	221970_1	3295801	3297138	scaffold_6	+	27	14	present	present	verified	27	antiSMASH
BGC0001403|c1|8918-9941|-|AFUA_4G14510|hypothetical_protein|EAL89344.2	DTO3_FUN_009189-T1	95.4	282	13	0	1	282	1	282	8.37e-205	558	100	282	282	DTO3	BGC0001403	DTO3_FUN_009189	221971_1	3297387	3298404	scaffold_6	-	27	14	present	present	verified	27	antiSMASH
BGC0001403|c1|10528-11319|+|AFUA_4G14520|toxin_biosynthesis_protein,_putative|EAL89343.1	DTO3_FUN_009190-T1	94.6	261	14	0	1	261	5	265	3.69e-185	507	99.2	263	273	DTO3	BGC0001403	DTO3_FUN_009190	221972_1	3298903	3299827	scaffold_6	+	27	14	present	present	verified	27	antiSMASH
BGC0001403|c1|11737-12414|+|AFUA_4G14530|glutathione_S-transferase_Ure2-like,_putative|EAL89342.1	DTO3_FUN_009191-T1	94.2	225	13	0	1	225	1	225	4.29e-165	453	100	225	225	DTO3	BGC0001403	DTO3_FUN_009191	221973_1	3300158	3300939	scaffold_6	+	27	14	present	present	verified	27	antiSMASH
BGC0001403|c1|12504-13694|-|AFUA_4G14540|C6_transcription_factor_(AflR),_putative|EAL89341.2	DTO3_FUN_009192-T1	87.6	396	49	0	1	396	1	396	1.86e-247	676	100	396	396	DTO3	BGC0001403	DTO3_FUN_009192	221974_1	3300958	3302148	scaffold_6	-	27	14	present	present	verified	27	antiSMASH
BGC0001403|c1|15066-16431|-|AFUA_4G14550|toxin_biosynthesis_regulatory_protein_AflJ,_putative|EAL89340.1	DTO3_FUN_009193-T1	89.1	433	47	0	1	433	1	433	2.88e-273	744	99.1	437	442	DTO3	BGC0001403	DTO3_FUN_009193	221975_1	3303574	3304954	scaffold_6	-	27	14	present	present	verified	27	antiSMASH
BGC0001403|c1|16737-22267|-|AFUA_4G14560|polyketide_synthase,_putative|EAL89339.1	DTO3_FUN_009194-T1	93.7	1785	109	1	1	1782	1	1785	0	3311	100	1782	1785	DTO3	BGC0001403	DTO3_FUN_009194	221976_1	3305283	3310824	scaffold_6	-	27	14	present	present	verified	27	antiSMASH
BGC0001403|c1|22406-23671|+|AFUA_4G14570|metallo-beta-lactamase_domain_protein,_putative|EAL89338.1	DTO3_FUN_009195-T1	88.8	339	19	1	83	421	1	320	1.2e-217	598	80.5	421	320	DTO3	BGC0001403	DTO3_FUN_009195	221977_1	3311215	3312235	scaffold_6	+	27	14	present	present	verified	27	antiSMASH
BGC0001403|c1|24072-25708|+|AFUA_4G14580|O-methyltransferase,_putative|EAL89337.1	DTO3_FUN_009196-T1	93.9	277	17	0	1	277	1	277	8.09e-186	520	57.5	482	307	DTO3	BGC0001403	DTO3_FUN_009196	221978_1	3312633	3313787	scaffold_6	+	27	14	present	present	verified	27	antiSMASH
BGC0001403|c1|4-1512|+|AFUA_4G14450|mannitol_dehydrogenase,_putative|EAL89350.1	DTO4_FUN_009190-T1	96.8	502	16	0	1	502	1	502	0	992	100	502	502	DTO4	BGC0001403	DTO4_FUN_009190	221965_1	3268955	3270950	scaffold_6	+	27	14	present	present	verified	27	antiSMASH
BGC0001403|c1|1911-2870|-|AFUA_4G14460|conserved_hypothetical_protein|EAL89349.1	DTO4_FUN_009191-T1	91.8	319	26	0	1	319	1	319	9.64e-225	612	100	319	319	DTO4	BGC0001403	DTO4_FUN_009191	221966_1	3271132	3272091	scaffold_6	-	27	14	present	present	verified	27	antiSMASH
BGC0001403|c1|3224-3759|-|AFUA_4G14480|conserved_hypothetical_protein|EAL89348.2	DTO4_FUN_009192-T1	92	162	12	1	1	161	1	162	1.46e-100	285	100	161	162	DTO4	BGC0001403	DTO4_FUN_009192	221967_1	3272448	3272985	scaffold_6	-	27	14	present	present	verified	27	antiSMASH
BGC0001403|c1|4034-4560|+|AFUA_4G14470|hypothetical_protein|EAL89347.1	DTO4_FUN_009193-T1	95.8	142	6	0	1	142	1	142	7.86e-101	284	100	142	146	DTO4	BGC0001403	DTO4_FUN_009193	221968_1	3273250	3273794	scaffold_6	+	27	14	present	present	verified	27	antiSMASH
BGC0001403|c1|4803-6930|+|AFUA_4G14490|extracellular_dihydrogeodin_oxidase/laccase,_putative|EAL89346.1	DTO4_FUN_009194-T1	92.4	609	42	2	1	609	1	605	0	1207	100	609	605	DTO4	BGC0001403	DTO4_FUN_009194	221969_1	3274041	3276168	scaffold_6	+	27	14	present	present	verified	27	antiSMASH
BGC0001403|c1|7420-8757|+|AFUA_4G14500|conserved_hypothetical_protein|EAL89345.1	DTO4_FUN_009195-T1	92.1	445	35	0	1	445	1	445	4.55e-305	825	100	445	445	DTO4	BGC0001403	DTO4_FUN_009195	221970_1	3276673	3278010	scaffold_6	+	27	14	present	present	verified	27	antiSMASH
BGC0001403|c1|8918-9941|-|AFUA_4G14510|hypothetical_protein|EAL89344.2	DTO4_FUN_009196-T1	95.4	282	13	0	1	282	1	282	8.45e-205	558	100	282	282	DTO4	BGC0001403	DTO4_FUN_009196	221971_1	3278259	3279276	scaffold_6	-	27	14	present	present	verified	27	antiSMASH
BGC0001403|c1|10528-11319|+|AFUA_4G14520|toxin_biosynthesis_protein,_putative|EAL89343.1	DTO4_FUN_009197-T1	94.6	261	14	0	1	261	5	265	3.72e-185	507	99.2	263	273	DTO4	BGC0001403	DTO4_FUN_009197	221972_1	3279716	3280699	scaffold_6	+	27	14	present	present	verified	27	antiSMASH
BGC0001403|c1|11737-12414|+|AFUA_4G14530|glutathione_S-transferase_Ure2-like,_putative|EAL89342.1	DTO4_FUN_009198-T1	94.2	225	13	0	1	225	1	225	4.33e-165	453	100	225	225	DTO4	BGC0001403	DTO4_FUN_009198	221973_1	3281029	3281782	scaffold_6	+	27	14	present	present	verified	27	antiSMASH
BGC0001403|c1|12504-13694|-|AFUA_4G14540|C6_transcription_factor_(AflR),_putative|EAL89341.2	DTO4_FUN_009199-T1	87.6	396	49	0	1	396	1	396	1.88e-247	676	100	396	396	DTO4	BGC0001403	DTO4_FUN_009199	221974_1	3281830	3283020	scaffold_6	-	27	14	present	present	verified	27	antiSMASH
BGC0001403|c1|15066-16431|-|AFUA_4G14550|toxin_biosynthesis_regulatory_protein_AflJ,_putative|EAL89340.1	DTO4_FUN_009200-T1	89.1	433	47	0	1	433	1	433	2.9e-273	744	99.1	437	442	DTO4	BGC0001403	DTO4_FUN_009200	221975_1	3284446	3285826	scaffold_6	-	27	14	present	present	verified	27	antiSMASH
BGC0001403|c1|16737-22267|-|AFUA_4G14560|polyketide_synthase,_putative|EAL89339.1	DTO4_FUN_009201-T1	93.7	1785	109	1	1	1782	1	1785	0	3311	100	1782	1785	DTO4	BGC0001403	DTO4_FUN_009201	221976_1	3286155	3291696	scaffold_6	-	27	14	present	present	verified	27	antiSMASH
BGC0001403|c1|22406-23671|+|AFUA_4G14570|metallo-beta-lactamase_domain_protein,_putative|EAL89338.1	DTO4_FUN_009202-T1	88.8	339	19	1	83	421	1	320	1.21e-217	598	80.5	421	320	DTO4	BGC0001403	DTO4_FUN_009202	221977_1	3292087	3293107	scaffold_6	+	27	14	present	present	verified	27	antiSMASH
BGC0001403|c1|24072-25708|+|AFUA_4G14580|O-methyltransferase,_putative|EAL89337.1	DTO4_FUN_009203-T1	95.6	482	21	0	1	482	1	482	0	932	100	482	482	DTO4	BGC0001403	DTO4_FUN_009203	221978_1	3293505	3295136	scaffold_6	+	27	14	present	present	verified	27	antiSMASH
BGC0001403|c1|4-1512|+|AFUA_4G14450|mannitol_dehydrogenase,_putative|EAL89350.1	DTO5_FUN_009197-T1	96.8	502	16	0	1	502	1	502	0	992	100	502	502	DTO5	BGC0001403	DTO5_FUN_009197	221965_1	3280095	3282109	scaffold_6	+	27	14	present	present	verified	27	antiSMASH
BGC0001403|c1|1911-2870|-|AFUA_4G14460|conserved_hypothetical_protein|EAL89349.1	DTO5_FUN_009198-T1	91.8	319	26	0	1	319	1	319	9.56e-225	612	100	319	319	DTO5	BGC0001403	DTO5_FUN_009198	221966_1	3282271	3283230	scaffold_6	-	27	14	present	present	verified	27	antiSMASH
BGC0001403|c1|3224-3759|-|AFUA_4G14480|conserved_hypothetical_protein|EAL89348.2	DTO5_FUN_009199-T1	92	162	12	1	1	161	1	162	1.45e-100	285	100	161	162	DTO5	BGC0001403	DTO5_FUN_009199	221967_1	3283587	3284124	scaffold_6	-	27	14	present	present	verified	27	antiSMASH
BGC0001403|c1|4034-4560|+|AFUA_4G14470|hypothetical_protein|EAL89347.1	DTO5_FUN_009200-T1	95.8	142	6	0	1	142	1	142	7.79e-101	284	100	142	146	DTO5	BGC0001403	DTO5_FUN_009200	221968_1	3284389	3284933	scaffold_6	+	27	14	present	present	verified	27	antiSMASH
BGC0001403|c1|4803-6930|+|AFUA_4G14490|extracellular_dihydrogeodin_oxidase/laccase,_putative|EAL89346.1	DTO5_FUN_009201-T1	92.4	609	42	2	1	609	1	605	0	1207	100	609	605	DTO5	BGC0001403	DTO5_FUN_009201	221969_1	3285180	3287307	scaffold_6	+	27	14	present	present	verified	27	antiSMASH
BGC0001403|c1|7420-8757|+|AFUA_4G14500|conserved_hypothetical_protein|EAL89345.1	DTO5_FUN_009202-T1	92.1	445	35	0	1	445	1	445	4.51e-305	825	100	445	445	DTO5	BGC0001403	DTO5_FUN_009202	221970_1	3287812	3289149	scaffold_6	+	27	14	present	present	verified	27	antiSMASH
BGC0001403|c1|8918-9941|-|AFUA_4G14510|hypothetical_protein|EAL89344.2	DTO5_FUN_009203-T1	95.4	282	13	0	1	282	1	282	8.37e-205	558	100	282	282	DTO5	BGC0001403	DTO5_FUN_009203	221971_1	3289398	3290415	scaffold_6	-	27	14	present	present	verified	27	antiSMASH
BGC0001403|c1|10528-11319|+|AFUA_4G14520|toxin_biosynthesis_protein,_putative|EAL89343.1	DTO5_FUN_009204-T1	94.6	261	14	0	1	261	1	261	3.19e-185	507	99.2	263	269	DTO5	BGC0001403	DTO5_FUN_009204	221972_1	3291029	3291838	scaffold_6	+	27	14	present	present	verified	27	antiSMASH
BGC0001403|c1|11737-12414|+|AFUA_4G14530|glutathione_S-transferase_Ure2-like,_putative|EAL89342.1	DTO5_FUN_009205-T1	94.2	225	13	0	1	225	1	225	4.29e-165	453	100	225	225	DTO5	BGC0001403	DTO5_FUN_009205	221973_1	3292168	3292955	scaffold_6	+	27	14	present	present	verified	27	antiSMASH
BGC0001403|c1|12504-13694|-|AFUA_4G14540|C6_transcription_factor_(AflR),_putative|EAL89341.2	DTO5_FUN_009206-T1	87.6	396	49	0	1	396	1	396	1.86e-247	676	100	396	396	DTO5	BGC0001403	DTO5_FUN_009206	221974_1	3292969	3294159	scaffold_6	-	27	14	present	present	verified	27	antiSMASH
BGC0001403|c1|15066-16431|-|AFUA_4G14550|toxin_biosynthesis_regulatory_protein_AflJ,_putative|EAL89340.1	DTO5_FUN_009207-T1	89.1	433	47	0	1	433	1	433	2.87e-273	744	99.1	437	442	DTO5	BGC0001403	DTO5_FUN_009207	221975_1	3295585	3296965	scaffold_6	-	27	14	present	present	verified	27	antiSMASH
BGC0001403|c1|16737-22267|-|AFUA_4G14560|polyketide_synthase,_putative|EAL89339.1	DTO5_FUN_009208-T1	93.7	1785	109	1	1	1782	1	1785	0	3311	100	1782	1785	DTO5	BGC0001403	DTO5_FUN_009208	221976_1	3297294	3302835	scaffold_6	-	27	14	present	present	verified	27	antiSMASH
BGC0001403|c1|22406-23671|+|AFUA_4G14570|metallo-beta-lactamase_domain_protein,_putative|EAL89338.1	DTO5_FUN_009209-T1	88.8	339	19	1	83	421	1	320	1.2e-217	598	80.5	421	320	DTO5	BGC0001403	DTO5_FUN_009209	221977_1	3303226	3304246	scaffold_6	+	27	14	present	present	verified	27	antiSMASH
BGC0001403|c1|24072-25708|+|AFUA_4G14580|O-methyltransferase,_putative|EAL89337.1	DTO5_FUN_009210-T1	95.6	482	21	0	1	482	1	482	0	932	100	482	482	DTO5	BGC0001403	DTO5_FUN_009210	221978_1	3304644	3306275	scaffold_6	+	27	14	present	present	verified	27	antiSMASH
BGC0001403|c1|4-1512|+|AFUA_4G14450|mannitol_dehydrogenase,_putative|EAL89350.1	DTO6_FUN_009301-T1	96.8	502	16	0	1	502	1	502	0	992	100	502	502	DTO6	BGC0001403	DTO6_FUN_009301	221965_1	3275851	3277899	scaffold_6	+	27	14	present	present	verified	27	antiSMASH
BGC0001403|c1|1911-2870|-|AFUA_4G14460|conserved_hypothetical_protein|EAL89349.1	DTO6_FUN_009302-T1	91.8	319	26	0	1	319	1	319	9.64e-225	612	100	319	319	DTO6	BGC0001403	DTO6_FUN_009302	221966_1	3278064	3279023	scaffold_6	-	27	14	present	present	verified	27	antiSMASH
BGC0001403|c1|3224-3759|-|AFUA_4G14480|conserved_hypothetical_protein|EAL89348.2	DTO6_FUN_009303-T1	92	162	12	1	1	161	1	162	1.46e-100	285	100	161	162	DTO6	BGC0001403	DTO6_FUN_009303	221967_1	3279380	3279917	scaffold_6	-	27	14	present	present	verified	27	antiSMASH
BGC0001403|c1|4034-4560|+|AFUA_4G14470|hypothetical_protein|EAL89347.1	DTO6_FUN_009304-T1	95.8	142	6	0	1	142	1	142	7.86e-101	284	100	142	146	DTO6	BGC0001403	DTO6_FUN_009304	221968_1	3280182	3280726	scaffold_6	+	27	14	present	present	verified	27	antiSMASH
BGC0001403|c1|4803-6930|+|AFUA_4G14490|extracellular_dihydrogeodin_oxidase/laccase,_putative|EAL89346.1	DTO6_FUN_009305-T1	92.4	609	42	2	1	609	1	605	0	1207	100	609	605	DTO6	BGC0001403	DTO6_FUN_009305	221969_1	3280973	3283100	scaffold_6	+	27	14	present	present	verified	27	antiSMASH
BGC0001403|c1|7420-8757|+|AFUA_4G14500|conserved_hypothetical_protein|EAL89345.1	DTO6_FUN_009306-T1	92.1	445	35	0	1	445	1	445	4.55e-305	825	100	445	445	DTO6	BGC0001403	DTO6_FUN_009306	221970_1	3283605	3284942	scaffold_6	+	27	14	present	present	verified	27	antiSMASH
BGC0001403|c1|8918-9941|-|AFUA_4G14510|hypothetical_protein|EAL89344.2	DTO6_FUN_009307-T1	95.4	282	13	0	1	282	1	282	8.44e-205	558	100	282	282	DTO6	BGC0001403	DTO6_FUN_009307	221971_1	3285191	3286208	scaffold_6	-	27	14	present	present	verified	27	antiSMASH
BGC0001403|c1|10528-11319|+|AFUA_4G14520|toxin_biosynthesis_protein,_putative|EAL89343.1	DTO6_FUN_009308-T1	94.6	261	14	0	1	261	5	265	3.72e-185	507	99.2	263	273	DTO6	BGC0001403	DTO6_FUN_009308	221972_1	3286729	3287814	scaffold_6	+	27	14	present	present	verified	27	antiSMASH
BGC0001403|c1|11737-12414|+|AFUA_4G14530|glutathione_S-transferase_Ure2-like,_putative|EAL89342.1	DTO6_FUN_009309-T1	94.2	225	13	0	1	225	1	225	4.32e-165	453	100	225	225	DTO6	BGC0001403	DTO6_FUN_009309	221973_1	3288003	3288680	scaffold_6	+	27	14	present	present	verified	27	antiSMASH
BGC0001403|c1|12504-13694|-|AFUA_4G14540|C6_transcription_factor_(AflR),_putative|EAL89341.2	DTO6_FUN_009310-T1	87.6	396	49	0	1	396	1	396	1.88e-247	676	100	396	396	DTO6	BGC0001403	DTO6_FUN_009310	221974_1	3288762	3289952	scaffold_6	-	27	14	present	present	verified	27	antiSMASH
BGC0001403|c1|15066-16431|-|AFUA_4G14550|toxin_biosynthesis_regulatory_protein_AflJ,_putative|EAL89340.1	DTO6_FUN_009311-T1	89.1	433	47	0	1	433	1	433	2.9e-273	744	99.1	437	442	DTO6	BGC0001403	DTO6_FUN_009311	221975_1	3291378	3292758	scaffold_6	-	27	14	present	present	verified	27	antiSMASH
BGC0001403|c1|16737-22267|-|AFUA_4G14560|polyketide_synthase,_putative|EAL89339.1	DTO6_FUN_009312-T1	93.7	1785	109	1	1	1782	1	1785	0	3311	100	1782	1785	DTO6	BGC0001403	DTO6_FUN_009312	221976_1	3293087	3298628	scaffold_6	-	27	14	present	present	verified	27	antiSMASH
BGC0001403|c1|22406-23671|+|AFUA_4G14570|metallo-beta-lactamase_domain_protein,_putative|EAL89338.1	DTO6_FUN_009313-T1	88.8	339	19	1	83	421	1	320	1.21e-217	598	80.5	421	320	DTO6	BGC0001403	DTO6_FUN_009313	221977_1	3299019	3300039	scaffold_6	+	27	14	present	present	verified	27	antiSMASH
BGC0001403|c1|24072-25708|+|AFUA_4G14580|O-methyltransferase,_putative|EAL89337.1	DTO6_FUN_009314-T1	95.6	482	21	0	1	482	1	482	0	932	100	482	482	DTO6	BGC0001403	DTO6_FUN_009314	221978_1	3300437	3302068	scaffold_6	+	27	14	present	present	verified	27	antiSMASH
BGC0001403|c1|4-1512|+|AFUA_4G14450|mannitol_dehydrogenase,_putative|EAL89350.1	DTO7_FUN_009230-T1	96.6	502	17	0	1	502	1	502	0	990	100	502	502	DTO7	BGC0001403	DTO7_FUN_009230	221965_1	3273244	3275281	scaffold_6	+	27	14	present	present	verified	27	antiSMASH
BGC0001403|c1|1911-2870|-|AFUA_4G14460|conserved_hypothetical_protein|EAL89349.1	DTO7_FUN_009231-T1	90.9	319	29	0	1	319	1	319	1.78e-220	601	100	319	319	DTO7	BGC0001403	DTO7_FUN_009231	221966_1	3275450	3276409	scaffold_6	-	27	14	present	present	verified	27	antiSMASH
BGC0001403|c1|3224-3759|-|AFUA_4G14480|conserved_hypothetical_protein|EAL89348.2	DTO7_FUN_009232-T1	92.6	162	11	1	1	161	1	162	1.52e-102	290	100	161	162	DTO7	BGC0001403	DTO7_FUN_009232	221967_1	3276783	3277320	scaffold_6	-	27	14	present	present	verified	27	antiSMASH
BGC0001403|c1|4034-4560|+|AFUA_4G14470|hypothetical_protein|EAL89347.1	DTO7_FUN_009233-T1	95.8	142	6	0	1	142	1	142	7.83e-101	284	100	142	146	DTO7	BGC0001403	DTO7_FUN_009233	221968_1	3277585	3278129	scaffold_6	+	27	14	present	present	verified	27	antiSMASH
BGC0001403|c1|4803-6930|+|AFUA_4G14490|extracellular_dihydrogeodin_oxidase/laccase,_putative|EAL89346.1	DTO7_FUN_009234-T1	92.6	609	42	1	1	609	1	606	0	1213	100	609	606	DTO7	BGC0001403	DTO7_FUN_009234	221969_1	3278376	3280506	scaffold_6	+	27	14	present	present	verified	27	antiSMASH
BGC0001403|c1|7420-8757|+|AFUA_4G14500|conserved_hypothetical_protein|EAL89345.1	DTO7_FUN_009235-T1	90.8	445	41	0	1	445	1	445	1.39e-299	811	100	445	445	DTO7	BGC0001403	DTO7_FUN_009235	221970_1	3281019	3282356	scaffold_6	+	27	14	present	present	verified	27	antiSMASH
BGC0001403|c1|8918-9941|-|AFUA_4G14510|hypothetical_protein|EAL89344.2	DTO7_FUN_009236-T1	94	282	17	0	1	282	1	282	3.83e-201	549	100	282	282	DTO7	BGC0001403	DTO7_FUN_009236	221971_1	3282598	3283614	scaffold_6	-	27	14	present	present	verified	27	antiSMASH
BGC0001403|c1|10528-11319|+|AFUA_4G14520|toxin_biosynthesis_protein,_putative|EAL89343.1	DTO7_FUN_009237-T1	94.3	261	15	0	1	261	1	261	5.31e-184	504	99.2	263	269	DTO7	BGC0001403	DTO7_FUN_009237	221972_1	3284228	3285069	scaffold_6	+	27	14	present	present	verified	27	antiSMASH
BGC0001403|c1|11737-12414|+|AFUA_4G14530|glutathione_S-transferase_Ure2-like,_putative|EAL89342.1	DTO7_FUN_009238-T1	94.2	225	13	0	1	225	1	225	8.69e-165	452	100	225	225	DTO7	BGC0001403	DTO7_FUN_009238	221973_1	3285366	3286143	scaffold_6	+	27	14	present	present	verified	27	antiSMASH
BGC0001403|c1|12504-13694|-|AFUA_4G14540|C6_transcription_factor_(AflR),_putative|EAL89341.2	DTO7_FUN_009239-T1	87.6	396	49	0	1	396	1	396	1.87e-247	676	100	396	396	DTO7	BGC0001403	DTO7_FUN_009239	221974_1	3286165	3287355	scaffold_6	-	27	14	present	present	verified	27	antiSMASH
BGC0001403|c1|15066-16431|-|AFUA_4G14550|toxin_biosynthesis_regulatory_protein_AflJ,_putative|EAL89340.1	DTO7_FUN_009240-T1	90.1	433	43	0	1	433	1	433	1.63e-276	753	99.1	437	439	DTO7	BGC0001403	DTO7_FUN_009240	221975_1	3288763	3290134	scaffold_6	-	27	14	present	present	verified	27	antiSMASH
BGC0001403|c1|16737-22267|-|AFUA_4G14560|polyketide_synthase,_putative|EAL89339.1	DTO7_FUN_009241-T1	93.3	1785	116	1	1	1782	1	1785	0	3304	100	1782	1785	DTO7	BGC0001403	DTO7_FUN_009241	221976_1	3290463	3296004	scaffold_6	-	27	14	present	present	verified	27	antiSMASH
BGC0001403|c1|22406-23671|+|AFUA_4G14570|metallo-beta-lactamase_domain_protein,_putative|EAL89338.1	DTO7_FUN_009242-T1	89.4	339	17	1	83	421	1	320	2.56e-219	602	80.5	421	320	DTO7	BGC0001403	DTO7_FUN_009242	221977_1	3296369	3297388	scaffold_6	+	27	14	present	present	verified	27	antiSMASH
BGC0001403|c1|24072-25708|+|AFUA_4G14580|O-methyltransferase,_putative|EAL89337.1	DTO7_FUN_009243-T1	95.6	482	21	0	1	482	1	482	0	933	100	482	482	DTO7	BGC0001403	DTO7_FUN_009243	221978_1	3297786	3299417	scaffold_6	+	27	14	present	present	verified	27	antiSMASH
BGC0001403|c1|4-1512|+|AFUA_4G14450|mannitol_dehydrogenase,_putative|EAL89350.1	DTO8_FUN_007659-T1	96.8	502	16	0	1	502	1	502	0	992	100	502	502	DTO8	BGC0001403	DTO8_FUN_007659	221965_1	3227078	3229141	scaffold_5	+	27	14	present	present	verified	27	antiSMASH
BGC0001403|c1|1911-2870|-|AFUA_4G14460|conserved_hypothetical_protein|EAL89349.1	DTO8_FUN_007660-T1	92.2	319	25	0	1	319	1	319	7.1e-225	612	100	319	319	DTO8	BGC0001403	DTO8_FUN_007660	221966_1	3229302	3230261	scaffold_5	-	27	14	present	present	verified	27	antiSMASH
BGC0001403|c1|3224-3759|-|AFUA_4G14480|conserved_hypothetical_protein|EAL89348.2	DTO8_FUN_007661-T1	92	162	12	1	1	161	1	162	1.53e-100	285	100	161	162	DTO8	BGC0001403	DTO8_FUN_007661	221967_1	3230618	3231155	scaffold_5	-	27	14	present	present	verified	27	antiSMASH
BGC0001403|c1|4034-4560|+|AFUA_4G14470|hypothetical_protein|EAL89347.1	DTO8_FUN_007662-T1	95.8	142	6	0	1	142	1	142	8.22e-101	284	100	142	146	DTO8	BGC0001403	DTO8_FUN_007662	221968_1	3231420	3231964	scaffold_5	+	27	14	present	present	verified	27	antiSMASH
BGC0001403|c1|4803-6930|+|AFUA_4G14490|extracellular_dihydrogeodin_oxidase/laccase,_putative|EAL89346.1	DTO8_FUN_007663-T1	92.6	609	42	1	1	609	1	606	0	1212	100	609	606	DTO8	BGC0001403	DTO8_FUN_007663	221969_1	3232211	3234341	scaffold_5	+	27	14	present	present	verified	27	antiSMASH
BGC0001403|c1|7420-8757|+|AFUA_4G14500|conserved_hypothetical_protein|EAL89345.1	DTO8_FUN_007664-T1	91.7	445	37	0	1	445	1	445	9.18e-303	820	100	445	445	DTO8	BGC0001403	DTO8_FUN_007664	221970_1	3234842	3236179	scaffold_5	+	27	14	present	present	verified	27	antiSMASH
BGC0001403|c1|8918-9941|-|AFUA_4G14510|hypothetical_protein|EAL89344.2	DTO8_FUN_007665-T1	95.4	282	13	0	1	282	1	282	8.83e-205	558	100	282	282	DTO8	BGC0001403	DTO8_FUN_007665	221971_1	3236426	3237443	scaffold_5	-	27	14	present	present	verified	27	antiSMASH
BGC0001403|c1|10528-11319|+|AFUA_4G14520|toxin_biosynthesis_protein,_putative|EAL89343.1	DTO8_FUN_007666-T1	94.6	261	14	0	1	261	5	265	3.89e-185	507	99.2	263	273	DTO8	BGC0001403	DTO8_FUN_007666	221972_1	3237954	3238853	scaffold_5	+	27	14	present	present	verified	27	antiSMASH
BGC0001403|c1|11737-12414|+|AFUA_4G14530|glutathione_S-transferase_Ure2-like,_putative|EAL89342.1	DTO8_FUN_007667-T1	93.8	225	14	0	1	225	1	225	1.84e-164	451	100	225	225	DTO8	BGC0001403	DTO8_FUN_007667	221973_1	3239184	3239969	scaffold_5	+	27	14	present	present	verified	27	antiSMASH
BGC0001403|c1|12504-13694|-|AFUA_4G14540|C6_transcription_factor_(AflR),_putative|EAL89341.2	DTO8_FUN_007668-T1	87.9	396	48	0	1	396	1	396	6.87e-248	677	100	396	396	DTO8	BGC0001403	DTO8_FUN_007668	221974_1	3239984	3241174	scaffold_5	-	27	14	present	present	verified	27	antiSMASH
BGC0001403|c1|15066-16431|-|AFUA_4G14550|toxin_biosynthesis_regulatory_protein_AflJ,_putative|EAL89340.1	DTO8_FUN_007669-T1	88.7	433	49	0	1	433	8	440	5.82e-272	741	99.1	437	446	DTO8	BGC0001403	DTO8_FUN_007669	221975_1	3242582	3243974	scaffold_5	-	27	14	present	present	verified	27	antiSMASH
BGC0001403|c1|16737-22267|-|AFUA_4G14560|polyketide_synthase,_putative|EAL89339.1	DTO8_FUN_007670-T1	94	1785	104	1	1	1782	1	1785	0	3328	100	1782	1785	DTO8	BGC0001403	DTO8_FUN_007670	221976_1	3244266	3249807	scaffold_5	-	27	14	present	present	verified	27	antiSMASH
BGC0001403|c1|22406-23671|+|AFUA_4G14570|metallo-beta-lactamase_domain_protein,_putative|EAL89338.1	DTO8_FUN_007671-T1	88.8	339	19	1	83	421	1	320	1.27e-217	598	80.5	421	320	DTO8	BGC0001403	DTO8_FUN_007671	221977_1	3250173	3251193	scaffold_5	+	27	14	present	present	verified	27	antiSMASH
BGC0001403|c1|24072-25708|+|AFUA_4G14580|O-methyltransferase,_putative|EAL89337.1	DTO8_FUN_007672-T1	95.6	482	21	0	1	482	1	482	0	932	100	482	482	DTO8	BGC0001403	DTO8_FUN_007672	221978_1	3251591	3253222	scaffold_5	+	27	14	present	present	verified	27	antiSMASH
BGC0001403|c1|4-1512|+|AFUA_4G14450|mannitol_dehydrogenase,_putative|EAL89350.1	DTO9_FUN_008331-T1	96.6	502	17	0	1	502	1	502	0	990	100	502	502	DTO9	BGC0001403	DTO9_FUN_008331	221965_1	177648	179156	scaffold_6	-	27	14	present	present	verified	27	antiSMASH
BGC0001403|c1|1911-2870|-|AFUA_4G14460|conserved_hypothetical_protein|EAL89349.1	DTO9_FUN_008330-T1	91.8	319	26	0	1	319	1	319	1.13e-223	609	100	319	319	DTO9	BGC0001403	DTO9_FUN_008330	221966_1	176233	177192	scaffold_6	+	27	14	present	present	verified	27	antiSMASH
BGC0001403|c1|3224-3759|-|AFUA_4G14480|conserved_hypothetical_protein|EAL89348.2	DTO9_FUN_008329-T1	92	162	12	1	1	161	1	162	1.48e-100	285	100	161	162	DTO9	BGC0001403	DTO9_FUN_008329	221967_1	175339	175876	scaffold_6	+	27	14	present	present	verified	27	antiSMASH
BGC0001403|c1|4034-4560|+|AFUA_4G14470|hypothetical_protein|EAL89347.1	DTO9_FUN_008328-T1	95.8	142	6	0	1	142	1	142	7.93e-101	284	100	142	146	DTO9	BGC0001403	DTO9_FUN_008328	221968_1	174530	175074	scaffold_6	-	27	14	present	present	verified	27	antiSMASH
BGC0001403|c1|4803-6930|+|AFUA_4G14490|extracellular_dihydrogeodin_oxidase/laccase,_putative|EAL89346.1	DTO9_FUN_008327-T1	92.3	609	43	2	1	609	1	605	0	1206	100	609	605	DTO9	BGC0001403	DTO9_FUN_008327	221969_1	172156	174283	scaffold_6	-	27	14	present	present	verified	27	antiSMASH
BGC0001403|c1|7420-8757|+|AFUA_4G14500|conserved_hypothetical_protein|EAL89345.1	DTO9_FUN_008326-T1	92.1	445	35	0	1	445	1	445	4.59e-305	825	100	445	445	DTO9	BGC0001403	DTO9_FUN_008326	221970_1	170302	171639	scaffold_6	-	27	14	present	present	verified	27	antiSMASH
BGC0001403|c1|8918-9941|-|AFUA_4G14510|hypothetical_protein|EAL89344.2	DTO9_FUN_008325-T1	95.4	282	13	0	1	282	1	282	8.52e-205	558	100	282	282	DTO9	BGC0001403	DTO9_FUN_008325	221971_1	169034	170051	scaffold_6	+	27	14	present	present	verified	27	antiSMASH
BGC0001403|c1|10528-11319|+|AFUA_4G14520|toxin_biosynthesis_protein,_putative|EAL89343.1	DTO9_FUN_008324-T1	94.6	261	14	0	1	261	1	261	3.24e-185	507	99.2	263	269	DTO9	BGC0001403	DTO9_FUN_008324	221972_1	167568	168420	scaffold_6	-	27	14	present	present	verified	27	antiSMASH
BGC0001403|c1|11737-12414|+|AFUA_4G14530|glutathione_S-transferase_Ure2-like,_putative|EAL89342.1	DTO9_FUN_008323-T1	94.2	225	13	0	1	225	1	225	4.36e-165	453	100	225	225	DTO9	BGC0001403	DTO9_FUN_008323	221973_1	166562	167239	scaffold_6	-	27	14	present	present	verified	27	antiSMASH
BGC0001403|c1|12504-13694|-|AFUA_4G14540|C6_transcription_factor_(AflR),_putative|EAL89341.2	DTO9_FUN_008322-T1	87.6	396	49	0	1	396	1	396	1.9e-247	676	100	396	396	DTO9	BGC0001403	DTO9_FUN_008322	221974_1	165290	166480	scaffold_6	+	27	14	present	present	verified	27	antiSMASH
BGC0001403|c1|15066-16431|-|AFUA_4G14550|toxin_biosynthesis_regulatory_protein_AflJ,_putative|EAL89340.1	DTO9_FUN_008321-T1	89.1	433	47	0	1	433	1	433	2.93e-273	744	99.1	437	442	DTO9	BGC0001403	DTO9_FUN_008321	221975_1	162484	163864	scaffold_6	+	27	14	present	present	verified	27	antiSMASH
BGC0001403|c1|16737-22267|-|AFUA_4G14560|polyketide_synthase,_putative|EAL89339.1	DTO9_FUN_008320-T1	93.7	1785	109	1	1	1782	1	1785	0	3311	100	1782	1785	DTO9	BGC0001403	DTO9_FUN_008320	221976_1	156614	162155	scaffold_6	+	27	14	present	present	verified	27	antiSMASH
BGC0001403|c1|22406-23671|+|AFUA_4G14570|metallo-beta-lactamase_domain_protein,_putative|EAL89338.1	DTO9_FUN_008319-T1	88.8	339	19	1	83	421	1	320	1.22e-217	598	80.5	421	320	DTO9	BGC0001403	DTO9_FUN_008319	221977_1	155203	156223	scaffold_6	-	27	14	present	present	verified	27	antiSMASH
BGC0001403|c1|24072-25708|+|AFUA_4G14580|O-methyltransferase,_putative|EAL89337.1	DTO9_FUN_008318-T1	95.6	482	21	0	1	482	38	519	0	932	100	482	519	DTO9	BGC0001403	DTO9_FUN_008318	221978_1	153174	155085	scaffold_6	-	27	14	present	present	verified	27	antiSMASH
BGC0000686|c1|1-2208|-|AFUA_4G14770|squalene-hopene-cyclase,_putative|EAL89318.1	DTO10_FUN_004822-T1	96.7	728	24	0	7	734	1	728	0	1443	99	735	732	DTO10	BGC0000686	DTO10_FUN_004822	222027_1	60658	62856	scaffold_4	-	28	9	present	present	verified	28	antiSMASH
BGC0000686|c1|2643-4385|-|AFUA_4G14780|cytochrome_P450_monooxygenase,_putative|EAL89317.1	DTO10_FUN_004823-T1	97.1	516	15	0	52	567	1	516	0	996	89	580	517	DTO10	BGC0000686	DTO10_FUN_004823	222025_1	63357	64910	scaffold_4	-	28	9	present	present	verified	28	antiSMASH
BGC0000686|c1|4964-6487|+|AFUA_4G14790|cytochrome_P450_monooxygenase,_putative|EAL89316.1	DTO10_FUN_004824-T1	95.9	507	21	0	1	507	1	507	0	983	100	507	507	DTO10	BGC0000686	DTO10_FUN_004824	222024_1	65643	67166	scaffold_4	+	28	9	present	present	verified	28	antiSMASH
BGC0000686|c1|6523-7296|-|AFUA_4G14800|short_chain_dehydrogenase,_putative|EAL89315.1	DTO10_FUN_004825-T1	96.5	257	9	0	1	257	1	257	3.26e-176	484	100	257	257	DTO10	BGC0000686	DTO10_FUN_004825	222022_1	67204	67977	scaffold_4	-	28	9	present	present	verified	28	antiSMASH
BGC0000686|c1|7577-9100|+|AFUA_4G14810|cytochrome_P450_monooxygenase,_putative|EAL89314.2	DTO10_FUN_004826-T1	96.3	507	19	0	1	507	1	507	0	984	100	507	507	DTO10	BGC0000686	DTO10_FUN_004826	222023_1	68266	69800	scaffold_4	+	28	9	present	present	verified	28	antiSMASH
BGC0000686|c1|9525-10961|+|AFUA_4G14820|transferase_family_protein|EAL89313.1	DTO10_FUN_004827-T1	93.6	481	28	1	1	478	1	481	0	879	100	478	481	DTO10	BGC0000686	DTO10_FUN_004827	222021_1	70187	71650	scaffold_4	+	28	9	present	present	verified	28	antiSMASH
BGC0000686|c1|11151-12665|+|AFUA_4G14830|cytochrome_P450_monooxygenase,_putative|EAL89312.1	DTO10_FUN_004828-T1	95.4	504	23	0	1	504	1	504	0	974	100	504	504	DTO10	BGC0000686	DTO10_FUN_004828	222020_1	71831	73350	scaffold_4	+	28	9	present	present	verified	28	antiSMASH
BGC0000686|c1|13067-14458|+|AFUA_4G14840|transferase_family_protein|EAL89311.1	DTO10_FUN_004829-T1	89.8	463	47	0	1	463	1	463	2.41e-300	815	100	463	463	DTO10	BGC0000686	DTO10_FUN_004829	222019_1	73746	75137	scaffold_4	+	28	9	present	present	verified	28	antiSMASH
BGC0000686|c1|14487-16277|-|AFUA_4G14850|extracellular_3-ketosteroid_1-dehydrogenase,_putative|EAL89310.1	DTO10_FUN_004830-T1	93.8	596	37	0	1	596	1	596	0	1133	100	596	596	DTO10	BGC0000686	DTO10_FUN_004830	222018_1	75166	76956	scaffold_4	-	28	9	present	present	verified	28	antiSMASH
BGC0000686|c1|1-2208|-|AFUA_4G14770|squalene-hopene-cyclase,_putative|EAL89318.1	DTO11_FUN_006079-T1	96.7	734	24	0	1	734	1	734	0	1454	99.9	735	738	DTO11	BGC0000686	DTO11_FUN_006079	222027_1	3367202	3369418	scaffold_4	+	28	9	present	present	verified	28	antiSMASH
BGC0000686|c1|2643-4385|-|AFUA_4G14780|cytochrome_P450_monooxygenase,_putative|EAL89317.1	DTO11_FUN_006078-T1	97.1	516	15	0	52	567	1	516	0	996	89	580	517	DTO11	BGC0000686	DTO11_FUN_006078	222025_1	3365166	3366719	scaffold_4	+	28	9	present	present	verified	28	antiSMASH
BGC0000686|c1|4964-6487|+|AFUA_4G14790|cytochrome_P450_monooxygenase,_putative|EAL89316.1	DTO11_FUN_006077-T1	95.7	507	22	0	1	507	1	507	0	985	100	507	507	DTO11	BGC0000686	DTO11_FUN_006077	222024_1	3362909	3364432	scaffold_4	-	28	9	present	present	verified	28	antiSMASH
BGC0000686|c1|6523-7296|-|AFUA_4G14800|short_chain_dehydrogenase,_putative|EAL89315.1	DTO11_FUN_006076-T1	98.1	257	5	0	1	257	1	257	1.64e-178	489	100	257	257	DTO11	BGC0000686	DTO11_FUN_006076	222022_1	3362098	3362871	scaffold_4	+	28	9	present	present	verified	28	antiSMASH
BGC0000686|c1|7577-9100|+|AFUA_4G14810|cytochrome_P450_monooxygenase,_putative|EAL89314.2	DTO11_FUN_006075-T1	95.9	507	21	0	1	507	1	507	0	986	100	507	507	DTO11	BGC0000686	DTO11_FUN_006075	222023_1	3360283	3361806	scaffold_4	-	28	9	present	present	verified	28	antiSMASH
BGC0000686|c1|9525-10961|+|AFUA_4G14820|transferase_family_protein|EAL89313.1	DTO11_FUN_006074-T1	91.9	484	33	1	1	478	1	484	0	868	100	478	484	DTO11	BGC0000686	DTO11_FUN_006074	222021_1	3358414	3359868	scaffold_4	-	28	9	present	present	verified	28	antiSMASH
BGC0000686|c1|11151-12665|+|AFUA_4G14830|cytochrome_P450_monooxygenase,_putative|EAL89312.1	DTO11_FUN_006073-T1	95.6	504	22	0	1	504	1	504	0	978	100	504	504	DTO11	BGC0000686	DTO11_FUN_006073	222020_1	3356701	3358233	scaffold_4	-	28	9	present	present	verified	28	antiSMASH
BGC0000686|c1|13067-14458|+|AFUA_4G14840|transferase_family_protein|EAL89311.1	DTO11_FUN_006072-T1	90.1	463	46	0	1	463	1	463	2.86e-301	817	100	463	463	DTO11	BGC0000686	DTO11_FUN_006072	222019_1	3354927	3356318	scaffold_4	-	28	9	present	present	verified	28	antiSMASH
BGC0000686|c1|14487-16277|-|AFUA_4G14850|extracellular_3-ketosteroid_1-dehydrogenase,_putative|EAL89310.1	DTO11_FUN_006071-T1	93.8	596	37	0	1	596	1	596	0	1135	100	596	596	DTO11	BGC0000686	DTO11_FUN_006071	222018_1	3353108	3354898	scaffold_4	+	28	9	present	present	verified	28	antiSMASH
BGC0000686|c1|1-2208|-|AFUA_4G14770|squalene-hopene-cyclase,_putative|EAL89318.1	DTO12_FUN_001540-T1	96.7	734	24	0	1	734	1	734	0	1454	99.9	735	738	DTO12	BGC0000686	DTO12_FUN_001540	222027_1	60969	63185	scaffold_2	-	28	9	present	present	verified	28	antiSMASH
BGC0000686|c1|2643-4385|-|AFUA_4G14780|cytochrome_P450_monooxygenase,_putative|EAL89317.1	DTO12_FUN_001541-T1	97.1	516	15	0	52	567	1	516	0	996	89	580	517	DTO12	BGC0000686	DTO12_FUN_001541	222025_1	63668	65221	scaffold_2	-	28	9	present	present	verified	28	antiSMASH
BGC0000686|c1|4964-6487|+|AFUA_4G14790|cytochrome_P450_monooxygenase,_putative|EAL89316.1	DTO12_FUN_001542-T1	95.7	507	22	0	1	507	1	507	0	985	100	507	507	DTO12	BGC0000686	DTO12_FUN_001542	222024_1	65955	67478	scaffold_2	+	28	9	present	present	verified	28	antiSMASH
BGC0000686|c1|6523-7296|-|AFUA_4G14800|short_chain_dehydrogenase,_putative|EAL89315.1	DTO12_FUN_001543-T1	98.1	257	5	0	1	257	1	257	1.74e-178	489	100	257	257	DTO12	BGC0000686	DTO12_FUN_001543	222022_1	67516	68289	scaffold_2	-	28	9	present	present	verified	28	antiSMASH
BGC0000686|c1|7577-9100|+|AFUA_4G14810|cytochrome_P450_monooxygenase,_putative|EAL89314.2	DTO12_FUN_001544-T1	95.9	507	21	0	1	507	1	507	0	986	100	507	507	DTO12	BGC0000686	DTO12_FUN_001544	222023_1	68581	70104	scaffold_2	+	28	9	present	present	verified	28	antiSMASH
BGC0000686|c1|9525-10961|+|AFUA_4G14820|transferase_family_protein|EAL89313.1	DTO12_FUN_001545-T1	92.1	484	32	1	1	478	9	492	0	870	100	478	492	DTO12	BGC0000686	DTO12_FUN_001545	222021_1	70371	71973	scaffold_2	+	28	9	present	present	verified	28	antiSMASH
BGC0000686|c1|11151-12665|+|AFUA_4G14830|cytochrome_P450_monooxygenase,_putative|EAL89312.1	DTO12_FUN_001546-T1	95.6	504	22	0	1	504	1	504	0	978	100	504	504	DTO12	BGC0000686	DTO12_FUN_001546	222020_1	72154	73688	scaffold_2	+	28	9	present	present	verified	28	antiSMASH
BGC0000686|c1|13067-14458|+|AFUA_4G14840|transferase_family_protein|EAL89311.1	DTO12_FUN_001547-T1	89.8	463	47	0	1	463	1	463	1.23e-300	816	100	463	463	DTO12	BGC0000686	DTO12_FUN_001547	222019_1	74069	75460	scaffold_2	+	28	9	present	present	verified	28	antiSMASH
BGC0000686|c1|14487-16277|-|AFUA_4G14850|extracellular_3-ketosteroid_1-dehydrogenase,_putative|EAL89310.1	DTO12_FUN_001548-T1	93.8	596	37	0	1	596	1	596	0	1135	100	596	596	DTO12	BGC0000686	DTO12_FUN_001548	222018_1	75489	77279	scaffold_2	-	28	9	present	present	verified	28	antiSMASH
BGC0000686|c1|1-2208|-|AFUA_4G14770|squalene-hopene-cyclase,_putative|EAL89318.1	DTO13_FUN_009399-T1	96.7	734	24	0	1	734	1	734	0	1454	99.9	735	738	DTO13	BGC0000686	DTO13_FUN_009399	222027_1	3299557	3301824	scaffold_6	+	28	9	present	present	verified	28	antiSMASH
BGC0000686|c1|2643-4385|-|AFUA_4G14780|cytochrome_P450_monooxygenase,_putative|EAL89317.1	DTO13_FUN_009398-T1	96.9	516	16	0	52	567	1	516	0	994	89	580	517	DTO13	BGC0000686	DTO13_FUN_009398	222025_1	3297455	3299232	scaffold_6	+	28	9	present	present	verified	28	antiSMASH
BGC0000686|c1|4964-6487|+|AFUA_4G14790|cytochrome_P450_monooxygenase,_putative|EAL89316.1	DTO13_FUN_009397-T1	95.9	507	21	0	1	507	1	507	0	982	100	507	507	DTO13	BGC0000686	DTO13_FUN_009397	222024_1	3295265	3297079	scaffold_6	-	28	9	present	present	verified	28	antiSMASH
BGC0000686|c1|6523-7296|-|AFUA_4G14800|short_chain_dehydrogenase,_putative|EAL89315.1	DTO13_FUN_009396-T1	96.5	257	9	0	1	257	1	257	3.2e-176	484	100	257	257	DTO13	BGC0000686	DTO13_FUN_009396	222022_1	3294470	3295243	scaffold_6	+	28	9	present	present	verified	28	antiSMASH
BGC0000686|c1|7577-9100|+|AFUA_4G14810|cytochrome_P450_monooxygenase,_putative|EAL89314.2	DTO13_FUN_009395-T1	95.7	507	22	0	1	507	1	507	0	985	100	507	507	DTO13	BGC0000686	DTO13_FUN_009395	222023_1	3292591	3294181	scaffold_6	-	28	9	present	present	verified	28	antiSMASH
BGC0000686|c1|9525-10961|+|AFUA_4G14820|transferase_family_protein|EAL89313.1	DTO13_FUN_009394-T1	93.8	481	27	1	1	478	1	481	0	879	100	478	481	DTO13	BGC0000686	DTO13_FUN_009394	222021_1	3290796	3292241	scaffold_6	-	28	9	present	present	verified	28	antiSMASH
BGC0000686|c1|11151-12665|+|AFUA_4G14830|cytochrome_P450_monooxygenase,_putative|EAL89312.1	DTO13_FUN_009393-T1	95.4	504	23	0	1	504	1	504	0	974	100	504	504	DTO13	BGC0000686	DTO13_FUN_009393	222020_1	3289099	3290613	scaffold_6	-	28	9	present	present	verified	28	antiSMASH
BGC0000686|c1|13067-14458|+|AFUA_4G14840|transferase_family_protein|EAL89311.1	DTO13_FUN_009392-T1	89.8	463	47	0	1	463	1	463	1.17e-300	816	100	463	463	DTO13	BGC0000686	DTO13_FUN_009392	222019_1	3287307	3288698	scaffold_6	-	28	9	present	present	verified	28	antiSMASH
BGC0000686|c1|14487-16277|-|AFUA_4G14850|extracellular_3-ketosteroid_1-dehydrogenase,_putative|EAL89310.1	DTO13_FUN_009391-T1	93.6	596	38	0	1	596	1	596	0	1132	100	596	596	DTO13	BGC0000686	DTO13_FUN_009391	222018_1	3285488	3287278	scaffold_6	+	28	9	present	present	verified	28	antiSMASH
BGC0000686|c1|1-2208|-|AFUA_4G14770|squalene-hopene-cyclase,_putative|EAL89318.1	DTO14_FUN_006020-T1	96.7	734	24	0	1	734	1	734	0	1454	99.9	735	738	DTO14	BGC0000686	DTO14_FUN_006020	222027_1	3298850	3301066	scaffold_4	+	28	9	present	present	verified	28	antiSMASH
BGC0000686|c1|2643-4385|-|AFUA_4G14780|cytochrome_P450_monooxygenase,_putative|EAL89317.1	DTO14_FUN_006019-T1	97.1	516	15	0	52	567	1	516	0	996	89	580	517	DTO14	BGC0000686	DTO14_FUN_006019	222025_1	3296814	3298367	scaffold_4	+	28	9	present	present	verified	28	antiSMASH
BGC0000686|c1|4964-6487|+|AFUA_4G14790|cytochrome_P450_monooxygenase,_putative|EAL89316.1	DTO14_FUN_006018-T1	95.7	507	22	0	1	507	1	507	0	985	100	507	507	DTO14	BGC0000686	DTO14_FUN_006018	222024_1	3294557	3296080	scaffold_4	-	28	9	present	present	verified	28	antiSMASH
BGC0000686|c1|6523-7296|-|AFUA_4G14800|short_chain_dehydrogenase,_putative|EAL89315.1	DTO14_FUN_006017-T1	98.1	257	5	0	1	257	1	257	1.72e-178	489	100	257	257	DTO14	BGC0000686	DTO14_FUN_006017	222022_1	3293746	3294519	scaffold_4	+	28	9	present	present	verified	28	antiSMASH
BGC0000686|c1|7577-9100|+|AFUA_4G14810|cytochrome_P450_monooxygenase,_putative|EAL89314.2	DTO14_FUN_006016-T1	95.9	507	21	0	1	507	1	507	0	986	100	507	507	DTO14	BGC0000686	DTO14_FUN_006016	222023_1	3291931	3293454	scaffold_4	-	28	9	present	present	verified	28	antiSMASH
BGC0000686|c1|9525-10961|+|AFUA_4G14820|transferase_family_protein|EAL89313.1	DTO14_FUN_006015-T1	92.1	484	32	1	1	478	1	484	0	870	100	478	484	DTO14	BGC0000686	DTO14_FUN_006015	222021_1	3290062	3291516	scaffold_4	-	28	9	present	present	verified	28	antiSMASH
BGC0000686|c1|11151-12665|+|AFUA_4G14830|cytochrome_P450_monooxygenase,_putative|EAL89312.1	DTO14_FUN_006014-T1	95.6	504	22	0	1	504	1	504	0	978	100	504	504	DTO14	BGC0000686	DTO14_FUN_006014	222020_1	3288367	3289881	scaffold_4	-	28	9	present	present	verified	28	antiSMASH
BGC0000686|c1|13067-14458|+|AFUA_4G14840|transferase_family_protein|EAL89311.1	DTO14_FUN_006013-T1	90.1	463	46	0	1	463	1	463	3.01e-301	817	100	463	463	DTO14	BGC0000686	DTO14_FUN_006013	222019_1	3286575	3287966	scaffold_4	-	28	9	present	present	verified	28	antiSMASH
BGC0000686|c1|14487-16277|-|AFUA_4G14850|extracellular_3-ketosteroid_1-dehydrogenase,_putative|EAL89310.1	DTO14_FUN_006012-T1	93.6	596	38	0	1	596	1	596	0	1132	100	596	596	DTO14	BGC0000686	DTO14_FUN_006012	222018_1	3284756	3286546	scaffold_4	+	28	9	present	present	verified	28	antiSMASH
BGC0000686|c1|1-2208|-|AFUA_4G14770|squalene-hopene-cyclase,_putative|EAL89318.1	DTO15_FUN_006049-T1	97	641	19	0	1	641	1	641	0	1264	87.2	735	650	DTO15	BGC0000686	DTO15_FUN_006049	222027_1	3306376	3308703	scaffold_4	+	28	9	present	present	verified	28	antiSMASH
BGC0000686|c1|2643-4385|-|AFUA_4G14780|cytochrome_P450_monooxygenase,_putative|EAL89317.1	DTO15_FUN_006048-T1	97.1	516	15	0	52	567	1	516	0	996	89	580	517	DTO15	BGC0000686	DTO15_FUN_006048	222025_1	3304155	3306197	scaffold_4	+	28	9	present	present	verified	28	antiSMASH
BGC0000686|c1|4964-6487|+|AFUA_4G14790|cytochrome_P450_monooxygenase,_putative|EAL89316.1	DTO15_FUN_006047-T1	95.7	507	22	0	1	507	1	507	0	985	100	507	507	DTO15	BGC0000686	DTO15_FUN_006047	222024_1	3302084	3303607	scaffold_4	-	28	9	present	present	verified	28	antiSMASH
BGC0000686|c1|6523-7296|-|AFUA_4G14800|short_chain_dehydrogenase,_putative|EAL89315.1	DTO15_FUN_006046-T1	98.1	257	5	0	1	257	1	257	1.71e-178	489	100	257	257	DTO15	BGC0000686	DTO15_FUN_006046	222022_1	3301273	3302046	scaffold_4	+	28	9	present	present	verified	28	antiSMASH
BGC0000686|c1|7577-9100|+|AFUA_4G14810|cytochrome_P450_monooxygenase,_putative|EAL89314.2	DTO15_FUN_006045-T1	95.9	507	21	0	1	507	1	507	0	986	100	507	507	DTO15	BGC0000686	DTO15_FUN_006045	222023_1	3299458	3300981	scaffold_4	-	28	9	present	present	verified	28	antiSMASH
BGC0000686|c1|9525-10961|+|AFUA_4G14820|transferase_family_protein|EAL89313.1	DTO15_FUN_006044-T1	92.1	484	32	1	1	478	9	492	0	870	100	478	492	DTO15	BGC0000686	DTO15_FUN_006044	222021_1	3297589	3299190	scaffold_4	-	28	9	present	present	verified	28	antiSMASH
BGC0000686|c1|11151-12665|+|AFUA_4G14830|cytochrome_P450_monooxygenase,_putative|EAL89312.1	DTO15_FUN_006043-T1	95.6	504	22	0	1	504	1	504	0	978	100	504	504	DTO15	BGC0000686	DTO15_FUN_006043	222020_1	3295774	3297431	scaffold_4	-	28	9	present	present	verified	28	antiSMASH
BGC0000686|c1|13067-14458|+|AFUA_4G14840|transferase_family_protein|EAL89311.1	DTO15_FUN_006042-T1	90.1	463	46	0	1	463	1	463	2.99e-301	817	100	463	463	DTO15	BGC0000686	DTO15_FUN_006042	222019_1	3294102	3295493	scaffold_4	-	28	9	present	present	verified	28	antiSMASH
BGC0000686|c1|14487-16277|-|AFUA_4G14850|extracellular_3-ketosteroid_1-dehydrogenase,_putative|EAL89310.1	DTO15_FUN_006041-T1	93.6	596	38	0	1	596	1	596	0	1132	100	596	596	DTO15	BGC0000686	DTO15_FUN_006041	222018_1	3292283	3294073	scaffold_4	+	28	9	present	present	verified	28	antiSMASH
BGC0000686|c1|1-2208|-|AFUA_4G14770|squalene-hopene-cyclase,_putative|EAL89318.1	DTO16_FUN_008807-T1	96.7	734	24	0	1	734	1	734	0	1454	99.9	735	738	DTO16	BGC0000686	DTO16_FUN_008807	222027_1	3331356	3333572	scaffold_6	+	28	9	present	present	verified	28	antiSMASH
BGC0000686|c1|2643-4385|-|AFUA_4G14780|cytochrome_P450_monooxygenase,_putative|EAL89317.1	DTO16_FUN_008806-T1	96.9	516	16	0	52	567	1	516	0	994	89	580	517	DTO16	BGC0000686	DTO16_FUN_008806	222025_1	3329320	3330873	scaffold_6	+	28	9	present	present	verified	28	antiSMASH
BGC0000686|c1|4964-6487|+|AFUA_4G14790|cytochrome_P450_monooxygenase,_putative|EAL89316.1	DTO16_FUN_008805-T1	96.1	507	20	0	1	507	1	507	0	985	100	507	507	DTO16	BGC0000686	DTO16_FUN_008805	222024_1	3327064	3328587	scaffold_6	-	28	9	present	present	verified	28	antiSMASH
BGC0000686|c1|6523-7296|-|AFUA_4G14800|short_chain_dehydrogenase,_putative|EAL89315.1	DTO16_FUN_008804-T1	96.5	257	9	0	1	257	1	257	3.2e-176	484	100	257	257	DTO16	BGC0000686	DTO16_FUN_008804	222022_1	3326253	3327026	scaffold_6	+	28	9	present	present	verified	28	antiSMASH
BGC0000686|c1|7577-9100|+|AFUA_4G14810|cytochrome_P450_monooxygenase,_putative|EAL89314.2	DTO16_FUN_008803-T1	95.9	507	21	0	1	507	1	507	0	986	100	507	507	DTO16	BGC0000686	DTO16_FUN_008803	222023_1	3324441	3325964	scaffold_6	-	28	9	present	present	verified	28	antiSMASH
BGC0000686|c1|9525-10961|+|AFUA_4G14820|transferase_family_protein|EAL89313.1	DTO16_FUN_008802-T1	92.1	484	32	1	1	478	1	484	0	870	100	478	484	DTO16	BGC0000686	DTO16_FUN_008802	222021_1	3322572	3324026	scaffold_6	-	28	9	present	present	verified	28	antiSMASH
BGC0000686|c1|11151-12665|+|AFUA_4G14830|cytochrome_P450_monooxygenase,_putative|EAL89312.1	DTO16_FUN_008801-T1	95.6	504	22	0	1	504	1	504	0	978	100	504	504	DTO16	BGC0000686	DTO16_FUN_008801	222020_1	3320877	3322417	scaffold_6	-	28	9	present	present	verified	28	antiSMASH
BGC0000686|c1|13067-14458|+|AFUA_4G14840|transferase_family_protein|EAL89311.1	DTO16_FUN_008800-T1	90.1	463	46	0	1	463	1	463	2.89e-301	817	100	463	463	DTO16	BGC0000686	DTO16_FUN_008800	222019_1	3319085	3320476	scaffold_6	-	28	9	present	present	verified	28	antiSMASH
BGC0000686|c1|14487-16277|-|AFUA_4G14850|extracellular_3-ketosteroid_1-dehydrogenase,_putative|EAL89310.1	DTO16_FUN_008799-T1	93.8	596	37	0	1	596	1	596	0	1135	100	596	596	DTO16	BGC0000686	DTO16_FUN_008799	222018_1	3317266	3319056	scaffold_6	+	28	9	present	present	verified	28	antiSMASH
BGC0000686|c1|1-2208|-|AFUA_4G14770|squalene-hopene-cyclase,_putative|EAL89318.1	DTO1_FUN_006048-T1	96.7	734	24	0	1	734	1	734	0	1454	99.9	735	738	DTO1	BGC0000686	DTO1_FUN_006048	222027_1	3304388	3306642	scaffold_4	+	28	9	present	present	verified	28	antiSMASH
BGC0000686|c1|2643-4385|-|AFUA_4G14780|cytochrome_P450_monooxygenase,_putative|EAL89317.1	DTO1_FUN_006047-T1	97.1	516	15	0	52	567	1	516	0	996	89	580	517	DTO1	BGC0000686	DTO1_FUN_006047	222025_1	3302270	3304018	scaffold_4	+	28	9	present	present	verified	28	antiSMASH
BGC0000686|c1|4964-6487|+|AFUA_4G14790|cytochrome_P450_monooxygenase,_putative|EAL89316.1	DTO1_FUN_006046-T1	95.7	507	22	0	1	507	1	507	0	985	100	507	507	DTO1	BGC0000686	DTO1_FUN_006046	222024_1	3300095	3301618	scaffold_4	-	28	9	present	present	verified	28	antiSMASH
BGC0000686|c1|6523-7296|-|AFUA_4G14800|short_chain_dehydrogenase,_putative|EAL89315.1	DTO1_FUN_006045-T1	98.1	257	5	0	1	257	1	257	1.72e-178	489	100	257	257	DTO1	BGC0000686	DTO1_FUN_006045	222022_1	3299284	3300057	scaffold_4	+	28	9	present	present	verified	28	antiSMASH
BGC0000686|c1|7577-9100|+|AFUA_4G14810|cytochrome_P450_monooxygenase,_putative|EAL89314.2	DTO1_FUN_006044-T1	95.9	507	21	0	1	507	1	507	0	986	100	507	507	DTO1	BGC0000686	DTO1_FUN_006044	222023_1	3297469	3298992	scaffold_4	-	28	9	present	present	verified	28	antiSMASH
BGC0000686|c1|9525-10961|+|AFUA_4G14820|transferase_family_protein|EAL89313.1	DTO1_FUN_006043-T1	92.1	484	32	1	1	478	1	484	0	870	100	478	484	DTO1	BGC0000686	DTO1_FUN_006043	222021_1	3295598	3297052	scaffold_4	-	28	9	present	present	verified	28	antiSMASH
BGC0000686|c1|11151-12665|+|AFUA_4G14830|cytochrome_P450_monooxygenase,_putative|EAL89312.1	DTO1_FUN_006042-T1	95.6	504	22	0	1	504	1	504	0	978	100	504	504	DTO1	BGC0000686	DTO1_FUN_006042	222020_1	3293903	3295417	scaffold_4	-	28	9	present	present	verified	28	antiSMASH
BGC0000686|c1|13067-14458|+|AFUA_4G14840|transferase_family_protein|EAL89311.1	DTO1_FUN_006041-T1	90.1	463	46	0	1	463	1	463	3e-301	817	100	463	463	DTO1	BGC0000686	DTO1_FUN_006041	222019_1	3292111	3293502	scaffold_4	-	28	9	present	present	verified	28	antiSMASH
BGC0000686|c1|14487-16277|-|AFUA_4G14850|extracellular_3-ketosteroid_1-dehydrogenase,_putative|EAL89310.1	DTO1_FUN_006040-T1	93.8	596	37	0	1	596	1	596	0	1135	100	596	596	DTO1	BGC0000686	DTO1_FUN_006040	222018_1	3290292	3292082	scaffold_4	+	28	9	present	present	verified	28	antiSMASH
BGC0000686|c1|1-2208|-|AFUA_4G14770|squalene-hopene-cyclase,_putative|EAL89318.1	DTO2_FUN_008157-T1	96.7	734	24	0	1	734	1	734	0	1454	99.9	735	738	DTO2	BGC0000686	DTO2_FUN_008157	222027_1	47867	50107	scaffold_6	-	28	9	present	present	verified	28	antiSMASH
BGC0000686|c1|2643-4385|-|AFUA_4G14780|cytochrome_P450_monooxygenase,_putative|EAL89317.1	DTO2_FUN_008158-T1	97.1	516	15	0	52	567	1	516	0	996	89	580	517	DTO2	BGC0000686	DTO2_FUN_008158	222025_1	50590	52242	scaffold_6	-	28	9	present	present	verified	28	antiSMASH
BGC0000686|c1|4964-6487|+|AFUA_4G14790|cytochrome_P450_monooxygenase,_putative|EAL89316.1	DTO2_FUN_008159-T1	95.7	507	22	0	1	507	1	507	0	985	100	507	507	DTO2	BGC0000686	DTO2_FUN_008159	222024_1	52877	54400	scaffold_6	+	28	9	present	present	verified	28	antiSMASH
BGC0000686|c1|6523-7296|-|AFUA_4G14800|short_chain_dehydrogenase,_putative|EAL89315.1	DTO2_FUN_008160-T1	98.1	257	5	0	1	257	1	257	1.65e-178	489	100	257	257	DTO2	BGC0000686	DTO2_FUN_008160	222022_1	54438	55211	scaffold_6	-	28	9	present	present	verified	28	antiSMASH
BGC0000686|c1|7577-9100|+|AFUA_4G14810|cytochrome_P450_monooxygenase,_putative|EAL89314.2	DTO2_FUN_008161-T1	95.9	507	21	0	1	507	1	507	0	986	100	507	507	DTO2	BGC0000686	DTO2_FUN_008161	222023_1	55503	57026	scaffold_6	+	28	9	present	present	verified	28	antiSMASH
BGC0000686|c1|9525-10961|+|AFUA_4G14820|transferase_family_protein|EAL89313.1	DTO2_FUN_008162-T1	92.1	484	32	1	1	478	9	492	0	870	100	478	492	DTO2	BGC0000686	DTO2_FUN_008162	222021_1	57284	58895	scaffold_6	+	28	9	present	present	verified	28	antiSMASH
BGC0000686|c1|11151-12665|+|AFUA_4G14830|cytochrome_P450_monooxygenase,_putative|EAL89312.1	DTO2_FUN_008163-T1	95.6	503	22	0	1	503	1	503	0	976	99.8	504	504	DTO2	BGC0000686	DTO2_FUN_008163	222020_1	59074	60590	scaffold_6	+	28	9	present	present	verified	28	antiSMASH
BGC0000686|c1|13067-14458|+|AFUA_4G14840|transferase_family_protein|EAL89311.1	DTO2_FUN_008164-T1	91.1	460	41	0	4	463	5	464	1.09e-303	823	99.4	463	464	DTO2	BGC0000686	DTO2_FUN_008164	222019_1	60992	62386	scaffold_6	+	28	9	present	present	verified	28	antiSMASH
BGC0000686|c1|14487-16277|-|AFUA_4G14850|extracellular_3-ketosteroid_1-dehydrogenase,_putative|EAL89310.1	DTO2_FUN_008165-T1	92.4	596	45	0	1	596	1	596	0	1114	100	596	596	DTO2	BGC0000686	DTO2_FUN_008165	222018_1	62415	64222	scaffold_6	-	28	9	present	present	verified	28	antiSMASH
BGC0000686|c1|1-2208|-|AFUA_4G14770|squalene-hopene-cyclase,_putative|EAL89318.1	DTO3_FUN_009240-T1	96.7	734	24	0	1	734	1	734	0	1454	99.9	735	738	DTO3	BGC0000686	DTO3_FUN_009240	222027_1	3405924	3408339	scaffold_6	+	28	9	present	present	verified	28	antiSMASH
BGC0000686|c1|2643-4385|-|AFUA_4G14780|cytochrome_P450_monooxygenase,_putative|EAL89317.1	DTO3_FUN_009239-T1	96.9	516	16	0	52	567	1	516	0	994	89	580	517	DTO3	BGC0000686	DTO3_FUN_009239	222025_1	3403782	3405552	scaffold_6	+	28	9	present	present	verified	28	antiSMASH
BGC0000686|c1|4964-6487|+|AFUA_4G14790|cytochrome_P450_monooxygenase,_putative|EAL89316.1	DTO3_FUN_009238-T1	95.7	507	22	0	1	507	1	507	0	985	100	507	507	DTO3	BGC0000686	DTO3_FUN_009238	222024_1	3401632	3403155	scaffold_6	-	28	9	present	present	verified	28	antiSMASH
BGC0000686|c1|6523-7296|-|AFUA_4G14800|short_chain_dehydrogenase,_putative|EAL89315.1	DTO3_FUN_009237-T1	98.1	257	5	0	1	257	1	257	1.66e-178	489	100	257	257	DTO3	BGC0000686	DTO3_FUN_009237	222022_1	3400821	3401594	scaffold_6	+	28	9	present	present	verified	28	antiSMASH
BGC0000686|c1|7577-9100|+|AFUA_4G14810|cytochrome_P450_monooxygenase,_putative|EAL89314.2	DTO3_FUN_009236-T1	95.9	507	21	0	1	507	1	507	0	986	100	507	507	DTO3	BGC0000686	DTO3_FUN_009236	222023_1	3399006	3400529	scaffold_6	-	28	9	present	present	verified	28	antiSMASH
BGC0000686|c1|9525-10961|+|AFUA_4G14820|transferase_family_protein|EAL89313.1	DTO3_FUN_009235-T1	92.1	484	32	1	1	478	1	484	0	870	100	478	484	DTO3	BGC0000686	DTO3_FUN_009235	222021_1	3397151	3398605	scaffold_6	-	28	9	present	present	verified	28	antiSMASH
BGC0000686|c1|11151-12665|+|AFUA_4G14830|cytochrome_P450_monooxygenase,_putative|EAL89312.1	DTO3_FUN_009234-T1	95.6	504	22	0	1	504	1	504	0	978	100	504	504	DTO3	BGC0000686	DTO3_FUN_009234	222020_1	3395389	3396996	scaffold_6	-	28	9	present	present	verified	28	antiSMASH
BGC0000686|c1|13067-14458|+|AFUA_4G14840|transferase_family_protein|EAL89311.1	DTO3_FUN_009233-T1	89.8	463	47	0	1	463	1	463	1.18e-300	816	100	463	463	DTO3	BGC0000686	DTO3_FUN_009233	222019_1	3393664	3395055	scaffold_6	-	28	9	present	present	verified	28	antiSMASH
BGC0000686|c1|14487-16277|-|AFUA_4G14850|extracellular_3-ketosteroid_1-dehydrogenase,_putative|EAL89310.1	DTO3_FUN_009232-T1	93.6	596	38	0	1	596	1	596	0	1132	100	596	596	DTO3	BGC0000686	DTO3_FUN_009232	222018_1	3391845	3393635	scaffold_6	+	28	9	present	present	verified	28	antiSMASH
BGC0000686|c1|1-2208|-|AFUA_4G14770|squalene-hopene-cyclase,_putative|EAL89318.1	DTO4_FUN_009248-T1	96.7	734	24	0	1	734	1	734	0	1454	99.9	735	738	DTO4	BGC0000686	DTO4_FUN_009248	222027_1	3386797	3389013	scaffold_6	+	28	9	present	present	verified	28	antiSMASH
BGC0000686|c1|2643-4385|-|AFUA_4G14780|cytochrome_P450_monooxygenase,_putative|EAL89317.1	DTO4_FUN_009247-T1	96.9	516	16	0	52	567	1	516	0	994	89	580	517	DTO4	BGC0000686	DTO4_FUN_009247	222025_1	3384661	3386423	scaffold_6	+	28	9	present	present	verified	28	antiSMASH
BGC0000686|c1|4964-6487|+|AFUA_4G14790|cytochrome_P450_monooxygenase,_putative|EAL89316.1	DTO4_FUN_009246-T1	95.7	507	22	0	1	507	1	507	0	985	100	507	507	DTO4	BGC0000686	DTO4_FUN_009246	222024_1	3382504	3384027	scaffold_6	-	28	9	present	present	verified	28	antiSMASH
BGC0000686|c1|6523-7296|-|AFUA_4G14800|short_chain_dehydrogenase,_putative|EAL89315.1	DTO4_FUN_009245-T1	98.1	257	5	0	1	257	1	257	1.67e-178	489	100	257	257	DTO4	BGC0000686	DTO4_FUN_009245	222022_1	3381693	3382466	scaffold_6	+	28	9	present	present	verified	28	antiSMASH
BGC0000686|c1|7577-9100|+|AFUA_4G14810|cytochrome_P450_monooxygenase,_putative|EAL89314.2	DTO4_FUN_009244-T1	95.9	507	21	0	1	507	1	507	0	986	100	507	507	DTO4	BGC0000686	DTO4_FUN_009244	222023_1	3379878	3381401	scaffold_6	-	28	9	present	present	verified	28	antiSMASH
BGC0000686|c1|9525-10961|+|AFUA_4G14820|transferase_family_protein|EAL89313.1	DTO4_FUN_009243-T1	92.1	484	32	1	1	478	1	484	0	870	100	478	484	DTO4	BGC0000686	DTO4_FUN_009243	222021_1	3378023	3379477	scaffold_6	-	28	9	present	present	verified	28	antiSMASH
BGC0000686|c1|11151-12665|+|AFUA_4G14830|cytochrome_P450_monooxygenase,_putative|EAL89312.1	DTO4_FUN_009242-T1	95.6	504	22	0	1	504	1	504	0	978	100	504	504	DTO4	BGC0000686	DTO4_FUN_009242	222020_1	3376328	3377842	scaffold_6	-	28	9	present	present	verified	28	antiSMASH
BGC0000686|c1|13067-14458|+|AFUA_4G14840|transferase_family_protein|EAL89311.1	DTO4_FUN_009241-T1	89.8	463	47	0	1	463	1	463	1.19e-300	816	100	463	463	DTO4	BGC0000686	DTO4_FUN_009241	222019_1	3374536	3375927	scaffold_6	-	28	9	present	present	verified	28	antiSMASH
BGC0000686|c1|14487-16277|-|AFUA_4G14850|extracellular_3-ketosteroid_1-dehydrogenase,_putative|EAL89310.1	DTO4_FUN_009240-T1	93.6	596	38	0	1	596	1	596	0	1132	100	596	596	DTO4	BGC0000686	DTO4_FUN_009240	222018_1	3372717	3374507	scaffold_6	+	28	9	present	present	verified	28	antiSMASH
BGC0000686|c1|1-2208|-|AFUA_4G14770|squalene-hopene-cyclase,_putative|EAL89318.1	DTO5_FUN_009256-T1	96.7	734	24	0	1	734	1	734	0	1454	99.9	735	738	DTO5	BGC0000686	DTO5_FUN_009256	222027_1	3397923	3400188	scaffold_6	+	28	9	present	present	verified	28	antiSMASH
BGC0000686|c1|2643-4385|-|AFUA_4G14780|cytochrome_P450_monooxygenase,_putative|EAL89317.1	DTO5_FUN_009255-T1	96.9	516	16	0	52	567	1	516	0	994	89	580	517	DTO5	BGC0000686	DTO5_FUN_009255	222025_1	3395789	3397664	scaffold_6	+	28	9	present	present	verified	28	antiSMASH
BGC0000686|c1|4964-6487|+|AFUA_4G14790|cytochrome_P450_monooxygenase,_putative|EAL89316.1	DTO5_FUN_009254-T1	95.7	507	22	0	1	507	1	507	0	985	100	507	507	DTO5	BGC0000686	DTO5_FUN_009254	222024_1	3393643	3395166	scaffold_6	-	28	9	present	present	verified	28	antiSMASH
BGC0000686|c1|6523-7296|-|AFUA_4G14800|short_chain_dehydrogenase,_putative|EAL89315.1	DTO5_FUN_009253-T1	98.1	257	5	0	1	257	1	257	1.66e-178	489	100	257	257	DTO5	BGC0000686	DTO5_FUN_009253	222022_1	3392832	3393605	scaffold_6	+	28	9	present	present	verified	28	antiSMASH
BGC0000686|c1|7577-9100|+|AFUA_4G14810|cytochrome_P450_monooxygenase,_putative|EAL89314.2	DTO5_FUN_009252-T1	95.9	507	21	0	1	507	1	507	0	986	100	507	507	DTO5	BGC0000686	DTO5_FUN_009252	222023_1	3391017	3392540	scaffold_6	-	28	9	present	present	verified	28	antiSMASH
BGC0000686|c1|9525-10961|+|AFUA_4G14820|transferase_family_protein|EAL89313.1	DTO5_FUN_009251-T1	92.1	484	32	1	1	478	1	484	0	870	100	478	484	DTO5	BGC0000686	DTO5_FUN_009251	222021_1	3389162	3390616	scaffold_6	-	28	9	present	present	verified	28	antiSMASH
BGC0000686|c1|11151-12665|+|AFUA_4G14830|cytochrome_P450_monooxygenase,_putative|EAL89312.1	DTO5_FUN_009250-T1	95.6	504	22	0	1	504	1	504	0	978	100	504	504	DTO5	BGC0000686	DTO5_FUN_009250	222020_1	3387467	3388992	scaffold_6	-	28	9	present	present	verified	28	antiSMASH
BGC0000686|c1|13067-14458|+|AFUA_4G14840|transferase_family_protein|EAL89311.1	DTO5_FUN_009249-T1	89.8	463	47	0	1	463	1	463	1.18e-300	816	100	463	463	DTO5	BGC0000686	DTO5_FUN_009249	222019_1	3385675	3387066	scaffold_6	-	28	9	present	present	verified	28	antiSMASH
BGC0000686|c1|14487-16277|-|AFUA_4G14850|extracellular_3-ketosteroid_1-dehydrogenase,_putative|EAL89310.1	DTO5_FUN_009248-T1	93.6	596	38	0	1	596	1	596	0	1132	100	596	596	DTO5	BGC0000686	DTO5_FUN_009248	222018_1	3383856	3385646	scaffold_6	+	28	9	present	present	verified	28	antiSMASH
BGC0000686|c1|1-2208|-|AFUA_4G14770|squalene-hopene-cyclase,_putative|EAL89318.1	DTO6_FUN_009360-T1	96.7	734	24	0	1	734	1	734	0	1454	99.9	735	738	DTO6	BGC0000686	DTO6_FUN_009360	222027_1	3393729	3395945	scaffold_6	+	28	9	present	present	verified	28	antiSMASH
BGC0000686|c1|2643-4385|-|AFUA_4G14780|cytochrome_P450_monooxygenase,_putative|EAL89317.1	DTO6_FUN_009359-T1	96.9	516	16	0	52	567	1	516	0	994	89	580	517	DTO6	BGC0000686	DTO6_FUN_009359	222025_1	3391693	3393246	scaffold_6	+	28	9	present	present	verified	28	antiSMASH
BGC0000686|c1|4964-6487|+|AFUA_4G14790|cytochrome_P450_monooxygenase,_putative|EAL89316.1	DTO6_FUN_009358-T1	95.7	507	22	0	1	507	1	507	0	985	100	507	507	DTO6	BGC0000686	DTO6_FUN_009358	222024_1	3389436	3390959	scaffold_6	-	28	9	present	present	verified	28	antiSMASH
BGC0000686|c1|6523-7296|-|AFUA_4G14800|short_chain_dehydrogenase,_putative|EAL89315.1	DTO6_FUN_009357-T1	98.1	257	5	0	1	257	1	257	1.67e-178	489	100	257	257	DTO6	BGC0000686	DTO6_FUN_009357	222022_1	3388625	3389398	scaffold_6	+	28	9	present	present	verified	28	antiSMASH
BGC0000686|c1|7577-9100|+|AFUA_4G14810|cytochrome_P450_monooxygenase,_putative|EAL89314.2	DTO6_FUN_009356-T1	95.9	507	21	0	1	507	1	507	0	986	100	507	507	DTO6	BGC0000686	DTO6_FUN_009356	222023_1	3386810	3388333	scaffold_6	-	28	9	present	present	verified	28	antiSMASH
BGC0000686|c1|9525-10961|+|AFUA_4G14820|transferase_family_protein|EAL89313.1	DTO6_FUN_009355-T1	92.1	484	32	1	1	478	1	484	0	870	100	478	484	DTO6	BGC0000686	DTO6_FUN_009355	222021_1	3384955	3386409	scaffold_6	-	28	9	present	present	verified	28	antiSMASH
BGC0000686|c1|11151-12665|+|AFUA_4G14830|cytochrome_P450_monooxygenase,_putative|EAL89312.1	DTO6_FUN_009354-T1	95.6	504	22	0	1	504	1	504	0	978	100	504	504	DTO6	BGC0000686	DTO6_FUN_009354	222020_1	3383260	3384774	scaffold_6	-	28	9	present	present	verified	28	antiSMASH
BGC0000686|c1|13067-14458|+|AFUA_4G14840|transferase_family_protein|EAL89311.1	DTO6_FUN_009353-T1	89.8	463	47	0	1	463	1	463	1.19e-300	816	100	463	463	DTO6	BGC0000686	DTO6_FUN_009353	222019_1	3381468	3382859	scaffold_6	-	28	9	present	present	verified	28	antiSMASH
BGC0000686|c1|14487-16277|-|AFUA_4G14850|extracellular_3-ketosteroid_1-dehydrogenase,_putative|EAL89310.1	DTO6_FUN_009352-T1	93.6	596	38	0	1	596	1	596	0	1132	100	596	596	DTO6	BGC0000686	DTO6_FUN_009352	222018_1	3379649	3381439	scaffold_6	+	28	9	present	present	verified	28	antiSMASH
BGC0000686|c1|1-2208|-|AFUA_4G14770|squalene-hopene-cyclase,_putative|EAL89318.1	DTO7_FUN_009290-T1	96.9	734	23	0	1	734	1	734	0	1456	99.9	735	738	DTO7	BGC0000686	DTO7_FUN_009290	222027_1	3391074	3393423	scaffold_6	+	28	9	present	present	verified	28	antiSMASH
BGC0000686|c1|2643-4385|-|AFUA_4G14780|cytochrome_P450_monooxygenase,_putative|EAL89317.1	DTO7_FUN_009289-T1	96.9	516	16	0	52	567	1	516	0	992	89	580	517	DTO7	BGC0000686	DTO7_FUN_009289	222025_1	3388825	3390787	scaffold_6	+	28	9	present	present	verified	28	antiSMASH
BGC0000686|c1|4964-6487|+|AFUA_4G14790|cytochrome_P450_monooxygenase,_putative|EAL89316.1	DTO7_FUN_009288-T1	95.9	507	21	0	1	507	1	507	0	982	100	507	507	DTO7	BGC0000686	DTO7_FUN_009288	222024_1	3386744	3388660	scaffold_6	-	28	9	present	present	verified	28	antiSMASH
BGC0000686|c1|6523-7296|-|AFUA_4G14800|short_chain_dehydrogenase,_putative|EAL89315.1	DTO7_FUN_009287-T1	96.5	257	9	0	1	257	1	257	2.64e-175	481	100	257	257	DTO7	BGC0000686	DTO7_FUN_009287	222022_1	3385972	3386745	scaffold_6	+	28	9	present	present	verified	28	antiSMASH
BGC0000686|c1|7577-9100|+|AFUA_4G14810|cytochrome_P450_monooxygenase,_putative|EAL89314.2	DTO7_FUN_009286-T1	95.9	507	21	0	1	507	1	507	0	981	100	507	507	DTO7	BGC0000686	DTO7_FUN_009286	222023_1	3384160	3385683	scaffold_6	-	28	9	present	present	verified	28	antiSMASH
BGC0000686|c1|9525-10961|+|AFUA_4G14820|transferase_family_protein|EAL89313.1	DTO7_FUN_009285-T1	93.8	481	27	1	1	478	9	489	0	880	100	478	489	DTO7	BGC0000686	DTO7_FUN_009285	222021_1	3382299	3383781	scaffold_6	-	28	9	present	present	verified	28	antiSMASH
BGC0000686|c1|11151-12665|+|AFUA_4G14830|cytochrome_P450_monooxygenase,_putative|EAL89312.1	DTO7_FUN_009284-T1	95.2	504	24	0	1	504	1	504	0	972	100	504	504	DTO7	BGC0000686	DTO7_FUN_009284	222020_1	3380602	3382116	scaffold_6	-	28	9	present	present	verified	28	antiSMASH
BGC0000686|c1|13067-14458|+|AFUA_4G14840|transferase_family_protein|EAL89311.1	DTO7_FUN_009283-T1	91.1	460	41	0	4	463	5	464	1.1e-303	823	99.4	463	464	DTO7	BGC0000686	DTO7_FUN_009283	222019_1	3378806	3380200	scaffold_6	-	28	9	present	present	verified	28	antiSMASH
BGC0000686|c1|14487-16277|-|AFUA_4G14850|extracellular_3-ketosteroid_1-dehydrogenase,_putative|EAL89310.1	DTO7_FUN_009282-T1	93.1	596	41	0	1	596	14	609	0	1128	100	596	609	DTO7	BGC0000686	DTO7_FUN_009282	222018_1	3376870	3378777	scaffold_6	+	28	9	present	present	verified	28	antiSMASH
BGC0000686|c1|1-2208|-|AFUA_4G14770|squalene-hopene-cyclase,_putative|EAL89318.1	DTO8_FUN_007721-T1	96.6	734	25	0	1	734	1	734	0	1452	99.9	735	738	DTO8	BGC0000686	DTO8_FUN_007721	222027_1	3363952	3366298	scaffold_5	+	28	9	present	present	verified	28	antiSMASH
BGC0000686|c1|2643-4385|-|AFUA_4G14780|cytochrome_P450_monooxygenase,_putative|EAL89317.1	DTO8_FUN_007720-T1	97.1	516	15	0	52	567	1	516	0	996	89	580	517	DTO8	BGC0000686	DTO8_FUN_007720	222025_1	3361911	3363746	scaffold_5	+	28	9	present	present	verified	28	antiSMASH
BGC0000686|c1|4964-6487|+|AFUA_4G14790|cytochrome_P450_monooxygenase,_putative|EAL89316.1	DTO8_FUN_007719-T1	95.9	507	21	0	1	507	1	507	0	983	100	507	507	DTO8	BGC0000686	DTO8_FUN_007719	222024_1	3359754	3361277	scaffold_5	-	28	9	present	present	verified	28	antiSMASH
BGC0000686|c1|6523-7296|-|AFUA_4G14800|short_chain_dehydrogenase,_putative|EAL89315.1	DTO8_FUN_007718-T1	96.5	257	9	0	1	257	1	257	3.38e-176	484	100	257	257	DTO8	BGC0000686	DTO8_FUN_007718	222022_1	3358943	3359716	scaffold_5	+	28	9	present	present	verified	28	antiSMASH
BGC0000686|c1|7577-9100|+|AFUA_4G14810|cytochrome_P450_monooxygenase,_putative|EAL89314.2	DTO8_FUN_007717-T1	96.3	507	19	0	1	507	1	507	0	984	100	507	507	DTO8	BGC0000686	DTO8_FUN_007717	222023_1	3357131	3358654	scaffold_5	-	28	9	present	present	verified	28	antiSMASH
BGC0000686|c1|9525-10961|+|AFUA_4G14820|transferase_family_protein|EAL89313.1	DTO8_FUN_007716-T1	93.6	481	28	1	1	478	1	481	0	879	100	478	481	DTO8	BGC0000686	DTO8_FUN_007716	222021_1	3355270	3356715	scaffold_5	-	28	9	present	present	verified	28	antiSMASH
BGC0000686|c1|11151-12665|+|AFUA_4G14830|cytochrome_P450_monooxygenase,_putative|EAL89312.1	DTO8_FUN_007715-T1	95.4	504	23	0	1	504	1	504	0	974	100	504	504	DTO8	BGC0000686	DTO8_FUN_007715	222020_1	3353557	3355089	scaffold_5	-	28	9	present	present	verified	28	antiSMASH
BGC0000686|c1|13067-14458|+|AFUA_4G14840|transferase_family_protein|EAL89311.1	DTO8_FUN_007714-T1	89.8	463	47	0	1	463	1	463	2.5e-300	815	100	463	463	DTO8	BGC0000686	DTO8_FUN_007714	222019_1	3351783	3353174	scaffold_5	-	28	9	present	present	verified	28	antiSMASH
BGC0000686|c1|14487-16277|-|AFUA_4G14850|extracellular_3-ketosteroid_1-dehydrogenase,_putative|EAL89310.1	DTO8_FUN_007713-T1	93.8	596	37	0	1	596	1	596	0	1133	100	596	596	DTO8	BGC0000686	DTO8_FUN_007713	222018_1	3349964	3351754	scaffold_5	+	28	9	present	present	verified	28	antiSMASH
BGC0000686|c1|1-2208|-|AFUA_4G14770|squalene-hopene-cyclase,_putative|EAL89318.1	DTO9_FUN_008273-T1	96.6	734	25	0	1	734	1	734	0	1453	99.9	735	738	DTO9	BGC0000686	DTO9_FUN_008273	222027_1	59081	61565	scaffold_6	-	28	9	present	present	verified	28	antiSMASH
BGC0000686|c1|2643-4385|-|AFUA_4G14780|cytochrome_P450_monooxygenase,_putative|EAL89317.1	DTO9_FUN_008274-T1	97.1	516	15	0	52	567	1	516	0	996	89	580	517	DTO9	BGC0000686	DTO9_FUN_008274	222025_1	62028	63581	scaffold_6	-	28	9	present	present	verified	28	antiSMASH
BGC0000686|c1|4964-6487|+|AFUA_4G14790|cytochrome_P450_monooxygenase,_putative|EAL89316.1	DTO9_FUN_008275-T1	95.7	507	22	0	1	507	1	507	0	985	100	507	507	DTO9	BGC0000686	DTO9_FUN_008275	222024_1	64315	65838	scaffold_6	+	28	9	present	present	verified	28	antiSMASH
BGC0000686|c1|6523-7296|-|AFUA_4G14800|short_chain_dehydrogenase,_putative|EAL89315.1	DTO9_FUN_008276-T1	98.1	257	5	0	1	257	1	257	1.69e-178	489	100	257	257	DTO9	BGC0000686	DTO9_FUN_008276	222022_1	65876	66649	scaffold_6	-	28	9	present	present	verified	28	antiSMASH
BGC0000686|c1|7577-9100|+|AFUA_4G14810|cytochrome_P450_monooxygenase,_putative|EAL89314.2	DTO9_FUN_008277-T1	96.6	507	17	0	1	507	1	507	0	991	100	507	507	DTO9	BGC0000686	DTO9_FUN_008277	222023_1	66941	68464	scaffold_6	+	28	9	present	present	verified	28	antiSMASH
BGC0000686|c1|9525-10961|+|AFUA_4G14820|transferase_family_protein|EAL89313.1	DTO9_FUN_008278-T1	92.8	483	30	1	1	478	9	491	0	875	100	478	491	DTO9	BGC0000686	DTO9_FUN_008278	222021_1	68750	70329	scaffold_6	+	28	9	present	present	verified	28	antiSMASH
BGC0000686|c1|11151-12665|+|AFUA_4G14830|cytochrome_P450_monooxygenase,_putative|EAL89312.1	DTO9_FUN_008279-T1	95.6	504	22	0	1	504	1	504	0	978	100	504	504	DTO9	BGC0000686	DTO9_FUN_008279	222020_1	70510	72024	scaffold_6	+	28	9	present	present	verified	28	antiSMASH
BGC0000686|c1|13067-14458|+|AFUA_4G14840|transferase_family_protein|EAL89311.1	DTO9_FUN_008280-T1	90.1	463	46	0	1	463	1	463	2.94e-301	817	100	463	463	DTO9	BGC0000686	DTO9_FUN_008280	222019_1	72425	73816	scaffold_6	+	28	9	present	present	verified	28	antiSMASH
BGC0000686|c1|14487-16277|-|AFUA_4G14850|extracellular_3-ketosteroid_1-dehydrogenase,_putative|EAL89310.1	DTO9_FUN_008281-T1	93.8	596	37	0	1	596	1	596	0	1136	100	596	596	DTO9	BGC0000686	DTO9_FUN_008281	222018_1	73845	75635	scaffold_6	-	28	9	present	present	verified	28	antiSMASH
BGC0002175|c1|215-6865|+|AO090102000545||BAE61567.1	DTO10_FUN_007150-T1	73.1	2151	560	9	1	2141	1	2143	0	3177	100	2141	2144	DTO10	BGC0002175	DTO10_FUN_007150	222089_1	3030185	3037880	scaffold_5	+	29	1	present	present	verified	29	antiSMASH
BGC0002175|c1|215-6865|+|AO090102000545||BAE61567.1	DTO11_FUN_008914-T1	73.1	2149	564	10	1	2141	1	2143	0	3178	100	2141	2144	DTO11	BGC0002175	DTO11_FUN_008914	222089_1	2307859	2316230	scaffold_7	+	29	1	present	present	verified	29	antiSMASH
BGC0002175|c1|215-6865|+|AO090102000545||BAE61567.1	DTO12_FUN_003824-T1	73.2	2151	558	10	1	2141	1	2143	0	3185	100	2141	2144	DTO12	BGC0002175	DTO12_FUN_003824	222089_1	2998720	3005352	scaffold_3	+	29	1	present	present	verified	29	antiSMASH
BGC0002175|c1|215-6865|+|AO090102000545||BAE61567.1	DTO13_FUN_000052-T1	73.2	2149	563	10	1	2141	1	2143	0	3180	100	2141	2144	DTO13	BGC0002175	DTO13_FUN_000052	222089_1	127340	133972	scaffold_1	-	29	1	present	present	verified	29	antiSMASH
BGC0002175|c1|215-6865|+|AO090102000545||BAE61567.1	DTO14_FUN_001726-T1	72.5	2069	541	11	96	2141	26	2088	0	3026	95.6	2141	2089	DTO14	BGC0002175	DTO14_FUN_001726	222089_1	4838240	4846950	scaffold_1	+	29	1	present	present	verified	29	antiSMASH
BGC0002175|c1|215-6865|+|AO090102000545||BAE61567.1	DTO15_FUN_001747-T1	73.2	2149	563	10	1	2141	1	2143	0	3180	100	2141	2144	DTO15	BGC0002175	DTO15_FUN_001747	222089_1	4839183	4845815	scaffold_1	+	29	1	present	present	verified	29	antiSMASH
BGC0002175|c1|215-6865|+|AO090102000545||BAE61567.1	DTO16_FUN_001701-T1	73.3	2151	557	10	1	2141	1	2143	0	3185	100	2141	2144	DTO16	BGC0002175	DTO16_FUN_001701	222089_1	4838539	4845234	scaffold_1	+	29	1	present	present	verified	29	antiSMASH
BGC0002175|c1|215-6865|+|AO090102000545||BAE61567.1	DTO1_FUN_006108-T1	72.8	2166	557	11	1	2141	1	2158	0	3175	100	2141	2159	DTO1	BGC0002175	DTO1_FUN_006108	222089_1	131672	138902	scaffold_5	-	29	1	present	present	verified	29	antiSMASH
BGC0002175|c1|215-6865|+|AO090102000545||BAE61567.1	DTO2_FUN_001699-T1	75.4	1849	439	8	289	2128	1	1842	0	2839	85.9	2141	1842	DTO2	BGC0002175	DTO2_FUN_001699	222089_1	4864976	4870889	scaffold_1	+	29	1	present	present	verified	29	antiSMASH
BGC0002175|c1|215-6865|+|AO090102000545||BAE61567.1	DTO3_FUN_000068-T1	72.6	2164	563	11	1	2141	1	2158	0	3170	100	2141	2159	DTO3	BGC0002175	DTO3_FUN_000068	222089_1	204323	211223	scaffold_1	-	29	1	present	present	verified	29	antiSMASH
BGC0002175|c1|215-6865|+|AO090102000545||BAE61567.1	DTO4_FUN_001710-T1	73.2	2149	563	10	1	2141	1	2143	0	3180	100	2141	2144	DTO4	BGC0002175	DTO4_FUN_001710	222089_1	4831701	4838525	scaffold_1	+	29	1	present	present	verified	29	antiSMASH
BGC0002175|c1|215-6865|+|AO090102000545||BAE61567.1	DTO5_FUN_001697-T1	75.9	1802	422	8	347	2141	2	1798	0	2784	83.8	2141	1799	DTO5	BGC0002175	DTO5_FUN_001697	222089_1	4817284	4823318	scaffold_1	+	29	1	present	present	verified	29	antiSMASH
BGC0002175|c1|215-6865|+|AO090102000545||BAE61567.1	DTO6_FUN_001714-T1	73.2	2149	563	10	1	2141	1	2143	0	3180	100	2141	2144	DTO6	BGC0002175	DTO6_FUN_001714	222089_1	4833635	4840267	scaffold_1	+	29	1	present	present	verified	29	antiSMASH
BGC0002175|c1|215-6865|+|AO090102000545||BAE61567.1	DTO7_FUN_001747-T1	73.2	2151	558	9	1	2141	1	2143	0	3181	100	2141	2144	DTO7	BGC0002175	DTO7_FUN_001747	222089_1	4987635	4994267	scaffold_1	+	29	1	present	present	verified	29	antiSMASH
BGC0002175|c1|215-6865|+|AO090102000545||BAE61567.1	DTO8_FUN_008660-T1	73.1	2151	560	9	1	2141	1	2143	0	3177	100	2141	2144	DTO8	BGC0002175	DTO8_FUN_008660	222089_1	2521020	2527652	scaffold_6	+	29	1	present	present	verified	29	antiSMASH
BGC0002175|c1|215-6865|+|AO090102000545||BAE61567.1	DTO9_FUN_000053-T1	73.2	2151	558	10	1	2141	1	2143	0	3185	100	2141	2144	DTO9	BGC0002175	DTO9_FUN_000053	222089_1	119438	127790	scaffold_1	-	29	1	present	present	verified	29	antiSMASH
BGC0002161|c1|1110-2924|+|PFICI_07100|hypothetical_protein|ETS82098.1	DTO10_FUN_007146-T1	39.1	530	299	12	7	517	4	528	1.38e-120	372	87.5	584	724	DTO10	BGC0002161	DTO10_FUN_007146	222092_1	3023220	3025583	scaffold_5	+	29	5	present	putative	verified	29	antiSMASH
BGC0002161|c1|8064-14662|+|PFICI_07101|hypothetical_protein|ETS82099.1	DTO10_FUN_007150-T1	43.9	2182	1143	33	9	2155	9	2144	0	1700	99.6	2155	2144	DTO10	BGC0002161	DTO10_FUN_007150	222089_1	3030185	3037880	scaffold_5	+	29	5	present	putative	verified	29	antiSMASH
BGC0002161|c1|29165-30071|-|PFICI_07103|hypothetical_protein|ETS82101.1	DTO10_FUN_007148-T1	51.8	257	123	1	19	275	7	262	2.69e-88	262	92.8	277	265	DTO10	BGC0002161	DTO10_FUN_007148	222095_1	3028109	3028999	scaffold_5	-	29	5	present	putative	verified	29	antiSMASH
BGC0002161|c1|1110-2924|+|PFICI_07100|hypothetical_protein|ETS82098.1	DTO11_FUN_008909-T1	37.8	479	274	12	7	466	4	477	5.77e-103	319	78.8	584	509	DTO11	BGC0002161	DTO11_FUN_008909	222093_1	2300683	2302262	scaffold_7	+	29	5	present	putative	verified	29	antiSMASH
BGC0002161|c1|8064-14662|+|PFICI_07101|hypothetical_protein|ETS82099.1	DTO11_FUN_008914-T1	44	2184	1137	34	9	2155	9	2144	0	1698	99.6	2155	2144	DTO11	BGC0002161	DTO11_FUN_008914	222089_1	2307859	2316230	scaffold_7	+	29	5	present	putative	verified	29	antiSMASH
BGC0002161|c1|29165-30071|-|PFICI_07103|hypothetical_protein|ETS82101.1	DTO11_FUN_008912-T1	51	255	124	1	19	273	7	260	8.02e-85	254	92.1	277	276	DTO11	BGC0002161	DTO11_FUN_008912	222095_1	2305596	2306426	scaffold_7	-	29	5	present	putative	verified	29	antiSMASH
BGC0002161|c1|1110-2924|+|PFICI_07100|hypothetical_protein|ETS82098.1	DTO12_FUN_003819-T1	37.8	479	274	12	7	466	4	477	6.1e-103	319	78.8	584	509	DTO12	BGC0002161	DTO12_FUN_003819	222093_1	2990869	2992448	scaffold_3	+	29	5	present	putative	verified	29	antiSMASH
BGC0002161|c1|8064-14662|+|PFICI_07101|hypothetical_protein|ETS82099.1	DTO12_FUN_003824-T1	44.1	2182	1138	33	9	2155	9	2144	0	1704	99.6	2155	2144	DTO12	BGC0002161	DTO12_FUN_003824	222089_1	2998720	3005352	scaffold_3	+	29	5	present	putative	verified	29	antiSMASH
BGC0002161|c1|29165-30071|-|PFICI_07103|hypothetical_protein|ETS82101.1	DTO12_FUN_003822-T1	51	255	124	1	19	273	7	260	8.48e-85	254	92.1	277	276	DTO12	BGC0002161	DTO12_FUN_003822	222095_1	2995785	2996615	scaffold_3	-	29	5	present	putative	verified	29	antiSMASH
BGC0002161|c1|1110-2924|+|PFICI_07100|hypothetical_protein|ETS82098.1	DTO13_FUN_000057-T1	37.8	479	274	12	7	466	4	477	5.82e-103	319	78.8	584	509	DTO13	BGC0002161	DTO13_FUN_000057	222093_1	140244	141823	scaffold_1	-	29	5	present	putative	verified	29	antiSMASH
BGC0002161|c1|8064-14662|+|PFICI_07101|hypothetical_protein|ETS82099.1	DTO13_FUN_000052-T1	44	2184	1137	34	9	2155	9	2144	0	1699	99.6	2155	2144	DTO13	BGC0002161	DTO13_FUN_000052	222089_1	127340	133972	scaffold_1	-	29	5	present	putative	verified	29	antiSMASH
BGC0002161|c1|29165-30071|-|PFICI_07103|hypothetical_protein|ETS82101.1	DTO13_FUN_000054-T1	51	255	124	1	19	273	7	260	8.09e-85	254	92.1	277	276	DTO13	BGC0002161	DTO13_FUN_000054	222095_1	136077	136907	scaffold_1	+	29	5	present	putative	verified	29	antiSMASH
BGC0002161|c1|1110-2924|+|PFICI_07100|hypothetical_protein|ETS82098.1	DTO14_FUN_001721-T1	37.8	479	274	12	7	466	4	477	6.06e-103	319	78.8	584	509	DTO14	BGC0002161	DTO14_FUN_001721	222093_1	4831156	4832735	scaffold_1	+	29	5	present	putative	verified	29	antiSMASH
BGC0002161|c1|8064-14662|+|PFICI_07101|hypothetical_protein|ETS82099.1	DTO14_FUN_001726-T1	44.3	2093	1069	32	115	2155	42	2089	0	1647	94.7	2155	2089	DTO14	BGC0002161	DTO14_FUN_001726	222089_1	4838240	4846950	scaffold_1	+	29	5	present	putative	verified	29	antiSMASH
BGC0002161|c1|29165-30071|-|PFICI_07103|hypothetical_protein|ETS82101.1	DTO14_FUN_001724-T1	51	255	124	1	19	273	7	260	8.42e-85	254	92.1	277	276	DTO14	BGC0002161	DTO14_FUN_001724	222095_1	4836072	4836902	scaffold_1	-	29	5	present	putative	verified	29	antiSMASH
BGC0002161|c1|1110-2924|+|PFICI_07100|hypothetical_protein|ETS82098.1	DTO15_FUN_001742-T1	37.8	479	274	12	7	466	4	477	6.02e-103	319	78.8	584	509	DTO15	BGC0002161	DTO15_FUN_001742	222093_1	4831332	4832911	scaffold_1	+	29	5	present	putative	verified	29	antiSMASH
BGC0002161|c1|8064-14662|+|PFICI_07101|hypothetical_protein|ETS82099.1	DTO15_FUN_001747-T1	44	2184	1137	34	9	2155	9	2144	0	1699	99.6	2155	2144	DTO15	BGC0002161	DTO15_FUN_001747	222089_1	4839183	4845815	scaffold_1	+	29	5	present	putative	verified	29	antiSMASH
BGC0002161|c1|29165-30071|-|PFICI_07103|hypothetical_protein|ETS82101.1	DTO15_FUN_001745-T1	51.4	257	124	1	19	275	7	262	2.22e-87	260	92.8	277	265	DTO15	BGC0002161	DTO15_FUN_001745	222095_1	4835986	4837138	scaffold_1	-	29	5	present	putative	verified	29	antiSMASH
BGC0002161|c1|1110-2924|+|PFICI_07100|hypothetical_protein|ETS82098.1	DTO16_FUN_001696-T1	37.8	479	274	12	7	466	4	477	5.81e-103	319	78.8	584	509	DTO16	BGC0002161	DTO16_FUN_001696	222093_1	4830751	4832330	scaffold_1	+	29	5	present	putative	verified	29	antiSMASH
BGC0002161|c1|8064-14662|+|PFICI_07101|hypothetical_protein|ETS82099.1	DTO16_FUN_001701-T1	44.1	2182	1138	33	9	2155	9	2144	0	1705	99.6	2155	2144	DTO16	BGC0002161	DTO16_FUN_001701	222089_1	4838539	4845234	scaffold_1	+	29	5	present	putative	verified	29	antiSMASH
BGC0002161|c1|29165-30071|-|PFICI_07103|hypothetical_protein|ETS82101.1	DTO16_FUN_001699-T1	51.4	257	124	1	19	275	7	262	2.14e-87	260	92.8	277	265	DTO16	BGC0002161	DTO16_FUN_001699	222095_1	4835606	4836497	scaffold_1	-	29	5	present	putative	verified	29	antiSMASH
BGC0002161|c1|1110-2924|+|PFICI_07100|hypothetical_protein|ETS82098.1	DTO1_FUN_006113-T1	37.8	479	274	12	7	466	4	477	6.03e-103	319	78.8	584	509	DTO1	BGC0002161	DTO1_FUN_006113	222093_1	144722	146301	scaffold_5	-	29	5	present	putative	verified	29	antiSMASH
BGC0002161|c1|8064-14662|+|PFICI_07101|hypothetical_protein|ETS82099.1	DTO1_FUN_006108-T1	43.8	2197	1139	34	9	2155	9	2159	0	1694	99.6	2155	2159	DTO1	BGC0002161	DTO1_FUN_006108	222089_1	131672	138902	scaffold_5	-	29	5	present	putative	verified	29	antiSMASH
BGC0002161|c1|29165-30071|-|PFICI_07103|hypothetical_protein|ETS82101.1	DTO1_FUN_006110-T1	51.4	257	124	1	19	275	7	262	2.22e-87	260	92.8	277	265	DTO1	BGC0002161	DTO1_FUN_006110	222095_1	140555	141446	scaffold_5	+	29	5	present	putative	verified	29	antiSMASH
BGC0002161|c1|1110-2924|+|PFICI_07100|hypothetical_protein|ETS82098.1	DTO2_FUN_001694-T1	37.8	479	274	12	7	466	4	477	4.11e-103	320	78.8	584	509	DTO2	BGC0002161	DTO2_FUN_001694	222093_1	4856450	4858029	scaffold_1	+	29	5	present	putative	verified	29	antiSMASH
BGC0002161|c1|8064-14662|+|PFICI_07101|hypothetical_protein|ETS82099.1	DTO2_FUN_001699-T1	45.9	1879	944	27	294	2139	2	1840	0	1575	85.7	2155	1842	DTO2	BGC0002161	DTO2_FUN_001699	222089_1	4864976	4870889	scaffold_1	+	29	5	present	putative	verified	29	antiSMASH
BGC0002161|c1|29165-30071|-|PFICI_07103|hypothetical_protein|ETS82101.1	DTO2_FUN_001697-T1	51.4	257	124	1	19	275	7	262	2.13e-87	260	92.8	277	265	DTO2	BGC0002161	DTO2_FUN_001697	222095_1	4861045	4862244	scaffold_1	-	29	5	present	putative	verified	29	antiSMASH
BGC0002161|c1|1110-2924|+|PFICI_07100|hypothetical_protein|ETS82098.1	DTO3_FUN_000074-T1	37.8	479	274	12	7	466	4	477	5.82e-103	319	78.8	584	509	DTO3	BGC0002161	DTO3_FUN_000074	222093_1	217355	218934	scaffold_1	-	29	5	present	putative	verified	29	antiSMASH
BGC0002161|c1|8064-14662|+|PFICI_07101|hypothetical_protein|ETS82099.1	DTO3_FUN_000068-T1	43.7	2199	1137	35	9	2155	9	2159	0	1690	99.6	2155	2159	DTO3	BGC0002161	DTO3_FUN_000068	222089_1	204323	211223	scaffold_1	-	29	5	present	putative	verified	29	antiSMASH
BGC0002161|c1|29165-30071|-|PFICI_07103|hypothetical_protein|ETS82101.1	DTO3_FUN_000071-T1	51.4	257	124	1	19	275	7	262	2.14e-87	260	92.8	277	265	DTO3	BGC0002161	DTO3_FUN_000071	222095_1	213188	214079	scaffold_1	+	29	5	present	putative	verified	29	antiSMASH
BGC0002161|c1|1110-2924|+|PFICI_07100|hypothetical_protein|ETS82098.1	DTO4_FUN_001705-T1	39.1	530	299	12	7	517	4	528	1.37e-120	372	87.5	584	724	DTO4	BGC0002161	DTO4_FUN_001705	222092_1	4823898	4826230	scaffold_1	+	29	5	present	putative	verified	29	antiSMASH
BGC0002161|c1|8064-14662|+|PFICI_07101|hypothetical_protein|ETS82099.1	DTO4_FUN_001710-T1	44	2184	1137	34	9	2155	9	2144	0	1699	99.6	2155	2144	DTO4	BGC0002161	DTO4_FUN_001710	222089_1	4831701	4838525	scaffold_1	+	29	5	present	putative	verified	29	antiSMASH
BGC0002161|c1|29165-30071|-|PFICI_07103|hypothetical_protein|ETS82101.1	DTO4_FUN_001708-T1	51.4	257	124	1	19	275	7	262	2.16e-87	260	92.8	277	265	DTO4	BGC0002161	DTO4_FUN_001708	222095_1	4828511	4829693	scaffold_1	-	29	5	present	putative	verified	29	antiSMASH
BGC0002161|c1|1110-2924|+|PFICI_07100|hypothetical_protein|ETS82098.1	DTO5_FUN_001692-T1	37.8	479	274	12	7	466	4	477	5.82e-103	319	78.8	584	509	DTO5	BGC0002161	DTO5_FUN_001692	222093_1	4808410	4809989	scaffold_1	+	29	5	present	putative	verified	29	antiSMASH
BGC0002161|c1|8064-14662|+|PFICI_07101|hypothetical_protein|ETS82099.1	DTO5_FUN_001697-T1	46.9	1811	893	25	377	2155	26	1799	0	1570	82.6	2155	1799	DTO5	BGC0002161	DTO5_FUN_001697	222089_1	4817284	4823318	scaffold_1	+	29	5	present	putative	verified	29	antiSMASH
BGC0002161|c1|29165-30071|-|PFICI_07103|hypothetical_protein|ETS82101.1	DTO5_FUN_001695-T1	51.4	257	124	1	19	275	7	262	2.14e-87	260	92.8	277	265	DTO5	BGC0002161	DTO5_FUN_001695	222095_1	4813265	4814156	scaffold_1	-	29	5	present	putative	verified	29	antiSMASH
BGC0002161|c1|1110-2924|+|PFICI_07100|hypothetical_protein|ETS82098.1	DTO6_FUN_001709-T1	37.8	479	274	12	7	466	4	477	5.87e-103	319	78.8	584	509	DTO6	BGC0002161	DTO6_FUN_001709	222093_1	4825784	4827363	scaffold_1	+	29	5	present	putative	verified	29	antiSMASH
BGC0002161|c1|8064-14662|+|PFICI_07101|hypothetical_protein|ETS82099.1	DTO6_FUN_001714-T1	44	2184	1137	34	9	2155	9	2144	0	1699	99.6	2155	2144	DTO6	BGC0002161	DTO6_FUN_001714	222089_1	4833635	4840267	scaffold_1	+	29	5	present	putative	verified	29	antiSMASH
BGC0002161|c1|29165-30071|-|PFICI_07103|hypothetical_protein|ETS82101.1	DTO6_FUN_001712-T1	51.4	257	124	1	19	275	7	262	2.16e-87	260	92.8	277	265	DTO6	BGC0002161	DTO6_FUN_001712	222095_1	4830639	4831530	scaffold_1	-	29	5	present	putative	verified	29	antiSMASH
BGC0002161|c1|1110-2924|+|PFICI_07100|hypothetical_protein|ETS82098.1	DTO7_FUN_001742-T1	37.8	479	274	12	7	466	4	477	5.85e-103	319	78.8	584	509	DTO7	BGC0002161	DTO7_FUN_001742	222093_1	4979794	4981373	scaffold_1	+	29	5	present	putative	verified	29	antiSMASH
BGC0002161|c1|8064-14662|+|PFICI_07101|hypothetical_protein|ETS82099.1	DTO7_FUN_001747-T1	44	2182	1142	33	9	2155	9	2144	0	1707	99.6	2155	2144	DTO7	BGC0002161	DTO7_FUN_001747	222089_1	4987635	4994267	scaffold_1	+	29	5	present	putative	verified	29	antiSMASH
BGC0002161|c1|29165-30071|-|PFICI_07103|hypothetical_protein|ETS82101.1	DTO7_FUN_001745-T1	51.8	257	123	1	19	275	7	262	2.66e-88	262	92.8	277	265	DTO7	BGC0002161	DTO7_FUN_001745	222095_1	4984550	4985530	scaffold_1	-	29	5	present	putative	verified	29	antiSMASH
BGC0002161|c1|1110-2924|+|PFICI_07100|hypothetical_protein|ETS82098.1	DTO8_FUN_008655-T1	39.1	530	299	12	7	517	4	528	1.43e-120	372	87.5	584	724	DTO8	BGC0002161	DTO8_FUN_008655	222092_1	2513164	2515435	scaffold_6	+	29	5	present	putative	verified	29	antiSMASH
BGC0002161|c1|8064-14662|+|PFICI_07101|hypothetical_protein|ETS82099.1	DTO8_FUN_008660-T1	43.9	2182	1143	33	9	2155	9	2144	0	1700	99.6	2155	2144	DTO8	BGC0002161	DTO8_FUN_008660	222089_1	2521020	2527652	scaffold_6	+	29	5	present	putative	verified	29	antiSMASH
BGC0002161|c1|29165-30071|-|PFICI_07103|hypothetical_protein|ETS82101.1	DTO8_FUN_008658-T1	51.8	257	123	1	19	275	7	262	2.79e-88	262	92.8	277	265	DTO8	BGC0002161	DTO8_FUN_008658	222095_1	2517697	2518968	scaffold_6	-	29	5	present	putative	verified	29	antiSMASH
BGC0002161|c1|1110-2924|+|PFICI_07100|hypothetical_protein|ETS82098.1	DTO9_FUN_000058-T1	39.1	530	299	12	7	517	4	528	1.38e-120	372	87.5	584	724	DTO9	BGC0002161	DTO9_FUN_000058	222092_1	132716	134987	scaffold_1	-	29	5	present	putative	verified	29	antiSMASH
BGC0002161|c1|8064-14662|+|PFICI_07101|hypothetical_protein|ETS82099.1	DTO9_FUN_000053-T1	44.1	2182	1138	33	9	2155	9	2144	0	1704	99.6	2155	2144	DTO9	BGC0002161	DTO9_FUN_000053	222089_1	119438	127790	scaffold_1	-	29	5	present	putative	verified	29	antiSMASH
BGC0002161|c1|29165-30071|-|PFICI_07103|hypothetical_protein|ETS82101.1	DTO9_FUN_000056-T1	51.4	257	124	1	19	275	7	262	2.18e-87	260	92.8	277	265	DTO9	BGC0002161	DTO9_FUN_000056	222095_1	129241	130132	scaffold_1	+	29	5	present	putative	verified	29	antiSMASH
BGC0001621|c1|3191-9487|-|AFLA_064240|nonribosomal_peptide_synthase,_putative|XP_002379984.1	DTO11_FUN_003451-T1	36.6	456	264	9	229	665	253	702	2.44e-72	268	21.1	2074	1679	DTO11	BGC0001621	DTO11_FUN_003451	223171_1	4635432	4640735	scaffold_2	+	30	10	present	putative	verified	30	antiSMASH
BGC0001621|c1|10407-11198|+|AFLA_064250|phenol_2-monooxygenase,_putative|XP_002379985.1	DTO11_FUN_003452-T1	54.9	215	78	2	1	215	122	317	4.09e-74	234	96.4	223	599	DTO11	BGC0001621	DTO11_FUN_003452	223170_1	4641432	4643425	scaffold_2	+	30	10	present	putative	verified	30	antiSMASH
BGC0001621|c1|16947-18112|+|AFLA_064280|N-methyltransferase,_putative|XP_002379988.1	DTO11_FUN_003448-T1	49.5	325	154	4	37	360	35	350	6.3e-107	317	87.8	369	378	DTO11	BGC0001621	DTO11_FUN_003448	223174_1	4625402	4626607	scaffold_2	+	30	10	present	putative	verified	30	antiSMASH
BGC0001621|c1|19549-21060|-|AFLA_064300|fructosyl_amino_acid_oxidase,_putative|XP_002379990.1	DTO11_FUN_003447-T1	46.7	501	225	10	1	470	1	490	2.11e-142	416	98.3	478	497	DTO11	BGC0001621	DTO11_FUN_003447	223175_1	4621544	4624857	scaffold_2	-	30	10	present	putative	verified	30	antiSMASH
BGC0001621|c1|25514-27169|-|AFLA_064330|conserved_hypothetical_protein|XP_002379993.1	DTO11_FUN_003446-T1	32.1	165	98	4	396	551	221	380	1.92e-16	80.1	28.3	551	382	DTO11	BGC0001621	DTO11_FUN_003446	223176_1	4621826	4623063	scaffold_2	+	30	10	present	putative	verified	30	antiSMASH
BGC0001621|c1|3191-9487|-|AFLA_064240|nonribosomal_peptide_synthase,_putative|XP_002379984.1	DTO13_FUN_005177-T1	36.6	456	264	9	229	665	253	702	2.46e-72	268	21.1	2074	1679	DTO13	BGC0001621	DTO13_FUN_005177	223171_1	4621255	4626432	scaffold_3	+	30	10	present	putative	verified	30	antiSMASH
BGC0001621|c1|10407-11198|+|AFLA_064250|phenol_2-monooxygenase,_putative|XP_002379985.1	DTO13_FUN_005178-T1	64	114	39	1	102	215	21	132	2.62e-42	146	51.1	223	414	DTO13	BGC0001621	DTO13_FUN_005178	223170_1	4626913	4629326	scaffold_3	+	30	10	present	putative	verified	30	antiSMASH
BGC0001621|c1|16947-18112|+|AFLA_064280|N-methyltransferase,_putative|XP_002379988.1	DTO13_FUN_005174-T1	49.5	325	154	4	37	360	35	350	3.17e-107	318	87.8	369	378	DTO13	BGC0001621	DTO13_FUN_005174	223174_1	4611016	4612271	scaffold_3	+	30	10	present	putative	verified	30	antiSMASH
BGC0001621|c1|19549-21060|-|AFLA_064300|fructosyl_amino_acid_oxidase,_putative|XP_002379990.1	DTO13_FUN_005173-T1	46.7	501	225	10	1	470	1	490	2.12e-142	416	98.3	478	497	DTO13	BGC0001621	DTO13_FUN_005173	223175_1	4607064	4610527	scaffold_3	-	30	10	present	putative	verified	30	antiSMASH
BGC0001621|c1|25514-27169|-|AFLA_064330|conserved_hypothetical_protein|XP_002379993.1	DTO13_FUN_005172-T1	32.1	165	98	4	396	551	218	377	1.89e-16	80.1	28.3	551	379	DTO13	BGC0001621	DTO13_FUN_005172	223176_1	4607588	4608727	scaffold_3	+	30	10	present	putative	verified	30	antiSMASH
BGC0001621|c1|3191-9487|-|AFLA_064240|nonribosomal_peptide_synthase,_putative|XP_002379984.1	DTO15_FUN_003546-T1	36.6	456	264	9	229	665	253	702	1.11e-72	268	21.1	2074	1378	DTO15	BGC0001621	DTO15_FUN_003546	223171_1	4748861	4754014	scaffold_2	+	30	10	present	putative	verified	30	antiSMASH
BGC0001621|c1|10407-11198|+|AFLA_064250|phenol_2-monooxygenase,_putative|XP_002379985.1	DTO15_FUN_003547-T1	54.9	215	78	2	1	215	119	314	4.02e-74	234	96.4	223	596	DTO15	BGC0001621	DTO15_FUN_003547	223170_1	4754290	4756781	scaffold_2	+	30	10	present	putative	verified	30	antiSMASH
BGC0001621|c1|16947-18112|+|AFLA_064280|N-methyltransferase,_putative|XP_002379988.1	DTO15_FUN_003543-T1	49.5	325	154	4	37	360	35	350	6.58e-107	317	87.8	369	378	DTO15	BGC0001621	DTO15_FUN_003543	223174_1	4738651	4739895	scaffold_2	+	30	10	present	putative	verified	30	antiSMASH
BGC0001621|c1|19549-21060|-|AFLA_064300|fructosyl_amino_acid_oxidase,_putative|XP_002379990.1	DTO15_FUN_003542-T1	46.9	501	224	10	1	470	1	490	5.48e-143	418	98.3	478	497	DTO15	BGC0001621	DTO15_FUN_003542	223175_1	4734617	4738216	scaffold_2	-	30	10	present	putative	verified	30	antiSMASH
BGC0001621|c1|25514-27169|-|AFLA_064330|conserved_hypothetical_protein|XP_002379993.1	DTO15_FUN_003541-T1	32.1	165	98	4	396	551	325	484	3.49e-16	80.1	28.3	551	486	DTO15	BGC0001621	DTO15_FUN_003541	223176_1	4734643	4736457	scaffold_2	+	30	10	present	putative	verified	30	antiSMASH
BGC0001621|c1|3191-9487|-|AFLA_064240|nonribosomal_peptide_synthase,_putative|XP_002379984.1	DTO16_FUN_003414-T1	36.6	456	264	9	229	665	253	702	2.46e-72	268	21.1	2074	1679	DTO16	BGC0001621	DTO16_FUN_003414	223171_1	4767649	4772765	scaffold_2	+	30	10	present	putative	verified	30	antiSMASH
[truncated: 2,202 more rows]
